# Supplementary material for: Integrated Regulation of the Type III Secretion System and Other Virulence Determinants in Ralstonia solanacearum
Source: PubMed Central journal article supplement (PMC1557829; doi:10.1371/journal.ppat.0020082), 2006-08-25
Supplement: ppat.0020082.st001.pdf [file ppat.0020082.st001.pdf]

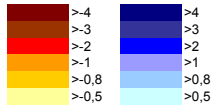

Boxes represent probable operons

| ID                                            | $\Delta hrpG$ | $hrpB \Delta$ | $pBBL12$ | Gene         | Description                                                                       |
|-----------------------------------------------|---------------|---------------|----------|--------------|-----------------------------------------------------------------------------------|
| <b>HrpG-activated independently from HrpB</b> |               |               |          |              |                                                                                   |
| RSc0107                                       |               | 2.08          | 0.00     |              | CONSERVED HYPOTHETICAL PROTEIN                                                    |
| RSc0117                                       |               | 2.16          | 0.00     |              | CONSERVED HYPOTHETICAL PROTEIN                                                    |
| RSc0118                                       |               | 2.42          | 0.00     |              | CONSERVED HYPOTHETICAL PROTEIN                                                    |
| RSc0158                                       |               | 2.17          | 0.00     |              | ARGINASE                                                                          |
| RSc0215                                       | -1.72         | 0.01          | 2.19     | 0.01         | OXIDOREDUCTASE COG1028                                                            |
| RSc0217                                       |               | 2.82          | 0.00     |              | OXIDOREDUCTASE COG0667                                                            |
| RSc0232                                       | 1.16          | 0.01          | 4.53     | 0.00         | HYPOTHETICAL PROTEIN                                                              |
| RSc0293                                       |               | 2.70          | 0.00     |              | SIGNAL PEPTIDE                                                                    |
| RSc0581                                       | -1.11         | 0.00          | 1.88     | 0.00         | PHOSPHOGLYCOLATE PHOSPHATASE                                                      |
| RSc0582                                       | -1.98         | 0.00          | 1.70     | 0.00         | <i>P. syringae</i> AVR-DRELATED PROTEIN                                           |
| RSc0720                                       | -3.07         | 0.00          | 1.45     | 0.03         | TRANSMEMBRANE TYPE 4 FIMBRIAL BIOGENESIS PROTEIN PILW-RELATED PROTEIN             |
| RSc0766                                       |               | 4.52          | 0.01     | <i>cfa2</i>  | CYCLOPROPANE-FATTY-ACYL-PHOSPHOLIPID SYNTHASE                                     |
| RSc0812                                       |               | 2.45          | 0.00     | <i>sorB</i>  | OXIDOREDUCTASE SULFITE:CYTOCHROME C OXIDOREDUCTASE (SUBUNIT A)                    |
| RSc0931                                       |               | 2.27          | 0.00     |              | SIGNAL PEPTIDE                                                                    |
| RSc0957                                       | -2.37         | 0.03          |          |              | HYPOTHETICAL PROTEIN                                                              |
| RSc1027                                       |               | 2.60          | 0.00     |              | TRANSMEMBRANE                                                                     |
| RSc1197                                       |               | 3.06          | 0.00     |              | OXIDOREDUCTASE COG1804                                                            |
| RSc1496                                       |               | 4.01          | 0.02     |              | HYPOTHETICAL PROTEIN                                                              |
| RSc1622                                       |               | 2.33          | 0.00     |              | TRANSMEMBRANE                                                                     |
| RSc1650                                       |               | 2.13          | 0.00     |              | SIGNAL PEPTIDE                                                                    |
| RSc1651                                       |               | 2.14          | 0.00     |              | TWIN-ARGININE TRANSLOCATION PATHWAY SIGNAL SEQUENCE DOMAIN PROTEIN                |
| RSc1676                                       |               | 2.81          | 0.00     |              | HYPOTHETICAL PROTEIN                                                              |
| RSc1725                                       |               | 4.00          | 0.00     |              | HYPOTHETICAL PROTEIN                                                              |
| RSc1726                                       |               | 3.96          | 0.00     |              | CONSERVED HYPOTHETICAL PROTEIN                                                    |
| RSc1727                                       |               | 3.81          | 0.00     |              | CONSERVED HYPOTHETICAL PROTEIN                                                    |
| RSc1733                                       |               | 3.44          | 0.00     |              | SPERMIDINE/PUTRESCINE-BINDING PERIPLASMIC PROTEIN                                 |
| RSc1756                                       | -3.09         | 0.00          | 3.10     | 0.00         | <i>pehB</i> SIGNAL PEPTIDE EXO-POLY-GALACTURONOSIDASE                             |
| RSc1910                                       |               | 2.01          | 0.00     |              | TRANSMEMBRANE                                                                     |
| RSc1926                                       | 0.71          | 0.01          | 2.13     | 0.00         | TRANSMEMBRANE                                                                     |
| RSc1927                                       |               | 1.85          | 0.00     |              | HYPOTHETICAL PROTEIN                                                              |
| RSc1969                                       |               | 2.08          | 0.00     |              | TRANSMEMBRANE                                                                     |
| RSc2024                                       | -2.10         | 0.01          |          |              | TRANSMEMBRANE COG1279                                                             |
| RSc2107                                       |               | 3.02          | 0.00     | <i>rsI</i>   | FUCOSE-BINDING LECTIN                                                             |
| RSc2131                                       |               | 3.08          | 0.00     |              | HYPOTHETICAL PROTEIN                                                              |
| RSc2138                                       |               | 3.26          | 0.00     |              | TRANSCRIPTION REGULATOR COG1733                                                   |
| RSc2281                                       |               | 2.00          | 0.03     |              | TRANSMEMBRANE                                                                     |
| RSc2282                                       | -1.64         | 0.04          | 2.16     | 0.00         | HYPOTHETICAL PROTEIN                                                              |
| RSc2283                                       |               | 1.98          | 0.00     |              | HYPOTHETICAL PROTEIN                                                              |
| RSc2284                                       | 0.49          | 0.05          | 2.61     | 0.11         | TRANSMEMBRANE COG3713                                                             |
| RSc2285                                       | -3.43         | 0.00          | 3.22     | 0.00         | <i>Agrobacterium</i> VIRK-LIKE PROTEIN                                            |
| RSc2286                                       | -3.06         | 0.00          | 3.58     | 0.00         | CYCLOPROPANE FATTY ACID SYNTHASE                                                  |
| RSc2328                                       | -2.78         | 0.00          |          |              | SIGNAL PEPTIDE COG0596                                                            |
| RSc2566                                       |               | 2.27          | 0.00     |              | METHYLATED-DNA--PROTEIN-CYSTEINE METHYLTRANSFERASE                                |
| RSc2858                                       |               | 2.80          | 0.00     |              | ZINC PROTEASE                                                                     |
| RSc2885                                       |               |               |          | <i>trpC1</i> | INDOLE-3-GLYCEROL PHOSPHATE SYNTHASE                                              |
| RSc2906                                       |               | 2.10          | 0.00     |              | TRANSMEMBRANE                                                                     |
| RSc2910                                       |               | 2.50          | 0.00     |              | SIGNAL PEPTIDE                                                                    |
| RSc3072                                       |               | 2.35          | 0.00     |              | CONSERVED HYPOTHETICAL PROTEIN                                                    |
| RSc3101                                       | -5.08         | 0.00          | 3.43     | 0.00         | SERINE PROTEASE                                                                   |
| RSc3288                                       |               | 4.31          | 0.00     |              | MANNOSE/FUCOSE-BINDING LECTIN                                                     |
| RSc3296                                       |               | 2.20          | 0.00     | <i>sdaA2</i> | L-SERINE AMONYA-LYASE, L-SERINE DEHYDRATASE 2 (L-SERINE DEAMINASE)                |
| RSc3315                                       |               | 2.74          | 0.00     |              | TRANSMEMBRANE                                                                     |
| RSp0002                                       | 2.47          | 0.00          | 3.41     | 0.00         | <i>cspD3</i> TRANSCRIPTION REGULATOR COLD SHOCK-LIKE PROTEIN                      |
| RSp0071                                       |               | 2.25          | 0.00     |              | CONSERVED HYPOTHETICAL PROTEIN                                                    |
| RSp0072                                       | -2.60         | 0.02          | 2.61     | 0.00         | CONSERVED HYPOTHETICAL PROTEIN                                                    |
| RSp0101                                       |               | 3.14          | 0.00     |              | CONSERVED HYPOTHETICAL PROTEIN                                                    |
| RSp0161                                       |               | 4.17          | 0.00     |              | TRANSMEMBRANE                                                                     |
| RSp0162                                       |               | 4.20          | 0.00     | <i>egl</i>   | ENDOGLUCANASE PRECURSOR (ENDO-1,4-BETA-GLUCANASE)                                 |
| RSp0198                                       | -2.41         | 0.00          | 1.89     | 0.00         | TRANSMEMBRANE                                                                     |
| RSp0199                                       |               |               |          |              | TRANSMEMBRANE                                                                     |
| RSp0200                                       |               | 3.23          | 0.00     |              | ORNITHINE/ACETYLORNITHINE AMINOTRANSFERASE                                        |
| RSp0201                                       |               | 5.17          | 0.00     |              | CONSERVED HYPOTHETICAL PROTEIN                                                    |
| RSp0275                                       |               | 3.78          | 0.00     |              | TRANSMEMBRANE                                                                     |
| RSp0294                                       |               | 2.62          | 0.01     |              | HEMOLYSIN-TYPE CALCIUM-BINDING PROTEIN                                            |
| RSp0338                                       |               | 2.37          | 0.00     | <i>epsR</i>  | TRANSCRIPTION REGULATOR NEGATIVE REGULATOR OF EXOPOLYSACCHARIDE PRODUCTION        |
| RSp0405                                       |               | 2.68          | 0.00     |              | HYPOTHETICAL PROTEIN                                                              |
| RSp0406                                       |               | 3.32          | 0.00     |              | HYPOTHETICAL PROTEIN                                                              |
| RSp0466                                       | -3.90         | 0.01          |          |              | HYPOTHETICAL PROTEIN                                                              |
| RSp0473                                       |               | 2.10          | 0.01     |              | TRANSMEMBRANE                                                                     |
| RSp0487                                       |               | 3.08          | 0.00     |              | ACETYLORNITHINE DEACETYLASE                                                       |
| RSp0506                                       |               | 2.14          | 0.00     |              | TRANSMEMBRANE GLYCIN-RICH PROTEIN                                                 |
| RSp0535                                       |               | 3.37          | 0.01     |              | TRANSCRIPTION REGULATOR LysR Family                                               |
| RSp0536                                       | -1.43         | 0.01          | 1.53     | 0.00         | TRANSMEMBRANE SUGAR-PROTON SYMPORTER                                              |
| RSp0596                                       |               | 2.77          | 0.00     |              | TRANSMEMBRANE                                                                     |
| RSp0603                                       | -2.65         | 0.00          | 3.13     | 0.00         | SERINE PROTEASE                                                                   |
| RSp0676                                       | -2.02         | 0.00          | 3.92     | 0.00         | <i>metE</i> 5-METHYLTETRAHYDROPTEROYLTRIGLUTAMATE--HOMOCYSTEINE METHYLTRANSFERASE |
| RSp0678                                       | 3.80          | 0.00          | 2.65     | 0.00         | <i>pdxH2</i> OXIDOREDUCTASE PYRIDOXAMINE 5'-PHOSPHATE OXIDASE (PNP/PMP OXIDASE)   |
| RSp0679                                       | 4.24          | 0.00          | 2.12     | 0.00         | DIAMINOPIMELATE DECARBOXYLASE                                                     |
| RSp0680                                       | 3.26          | 0.00          | 2.18     | 0.00         | <i>trpC2</i> INDOLE-3-GLYCEROL PHOSPHATE SYNTHASE                                 |
| RSp0681                                       | 1.47          | 0.00          | 1.20     | 0.00         | <i>trpD2</i> ANTHRANILATE PHOSPHORIBOSYLTRANSFERASE (GLYCOSYLTRANSFERASE)         |
| RSp0682                                       | 4.94          | 0.00          | 2.72     | 0.00         | OXIDOREDUCTASE TRIMETHYLAMINE DEHYDROGENASE                                       |
| RSp0683                                       | 4.26          | 0.00          | 2.58     | 0.00         | COG0325, Predicted enzyme with a TIM-barrel fold                                  |
| RSp0684 RS                                    | 4.35          | 0.00          | 2.69     | 0.00         | CONSERVED HYPOTHETICAL PROTEIN                                                    |
| RSp0685                                       | 3.93          | 0.00          | 3.83     | 0.00         | TRANSMEMBRANE                                                                     |
| RSp0881                                       |               |               |          |              | TRANSMEMBRANE GLYCOSYL HYDROLASE                                                  |
| RSp0883                                       | -1.56         | 0.02          | 3.11     | 0.00         | CHAPERONIN GroEL-RELATED PROTEIN                                                  |
| RSp0898                                       | -3.53         | 0.02          |          | <i>dsbA2</i> | SIGNAL PEPTIDE THIOL:DISULFIDE INTERCHANGE PROTEIN                                |
| RSp0906                                       | -0.55         | 0.03          | 2.54     | 0.00         | SIGNAL PEPTIDE                                                                    |
| RSp0957                                       |               | 1.20          | 0.00     |              | HYPOTHETICAL PROTEIN                                                              |
| RSp0983                                       |               | 2.38          | 0.02     |              | TRANSCRIPTION REGULATOR LuxR family                                               |
| RSp1112                                       | -2.47         | 0.03          |          |              | TRANSMEMBRANE TRANSMEMBRANE MULTIDRUG EFFLUX SYSTEM PROTEIN                       |
| RSp1124                                       | -2.66         | 0.00          | 2.61     | 0.00         | OXIDOREDUCTASE                                                                    |
| RSp1125                                       | -3.26         | 0.00          | 1.96     | 0.02         | HYPOTHETICAL PROTEIN                                                              |
| RSp1260                                       |               | 5.02          | 0.00     |              | HYPOTHETICAL PROTEIN                                                              |
| RSp1364                                       | -4.71         | 0.02          |          | <i>sucA</i>  | OXIDOREDUCTASE 2-OXOGLUTARATE DEHYDROGENASE E1 DECARBOXYLASE COMPONENT            |
| RSp1417                                       | -1.10         | 0.00          | 2.21     | 0.00         | PERMEASE                                                                          |
| RSp1418                                       | -3.49         | 0.00          | 3.02     | 0.00         | HYDROLASE                                                                         |
| RSp1419                                       | -3.09         | 0.00          | 2.80     | 0.00         | PEPTIDE SYNTHASE                                                                  |
| RSp1425                                       |               | 1.77          | 0.00     | <i>pvdA</i>  | OXIDOREDUCTASE L-ORNITHINE 5-MONOXYGENASE                                         |
| RSp1428                                       |               | 2.99          | 0.02     |              | COG0607, Rhodanese-related sulfurtransferase                                      |
| RSp1447                                       |               | 4.82          | 0.00     |              | ABC TRANSPORTER                                                                   |

|         |       |      |      |      |                                                             |
|---------|-------|------|------|------|-------------------------------------------------------------|
| RSp1461 | -3.58 | 0.00 | 3.63 | 0.00 | SIGNAL PEPTIDE                                              |
| RSp1462 |       |      | 3.96 | 0.00 | OUTER-MEMBRANE EFFLUX PROTEIN                               |
| RSp1463 |       |      | 3.88 | 0.00 | ABC TRANSPORTER HlyD family secretion protein               |
| RSp1464 |       |      | 3.23 | 0.00 | ABC TRANSPORTER ABC-type transport system, ATPase component |
| RSp1466 |       |      | 4.56 | 0.00 | SIGNAL PEPTIDE                                              |
| RSp1467 |       |      | 2.99 | 0.00 | SIGNAL PEPTIDE                                              |
| RSp1529 | -1.23 | 0.01 | 4.00 | 0.00 | ETHYLENE-FORMING-ENZYME (EC 1.14.11.-)                      |
| RSp1581 | -1.97 | 0.00 | 2.67 | 0.00 | katE OXIDOREDUCTASE CATALASE hydroperoxidase HP11           |
| RSp1604 |       |      | 1.49 | 0.00 | TRANSMEMBRANE                                               |
| RSp1610 | -4.43 | 0.00 | 2.68 | 0.00 | HYPOTHETICAL PROTEIN                                        |
| RSp1670 |       |      | 2.43 | 0.00 | SIGNAL PEPTIDE                                              |

**HrpG-repressed independently from HrpB**

|            |       |      |       |      |                                                                                                     |
|------------|-------|------|-------|------|-----------------------------------------------------------------------------------------------------|
| RSc0018    | -0.28 | 0.42 | -2.06 | 0.00 | TRANSCRIPTION REGULATOR RESPONSE REGULATOR                                                          |
| RSc0380    |       |      |       |      | nasE ABC TRANSPORTER NITRATE TRANSMEMBRANE PROTEIN                                                  |
| RSc0392    |       |      |       |      | SIGNAL PEPTIDE PROLIN-RICH PROTEIN                                                                  |
| RSc0416    |       |      | -3.07 | 0.00 | COG0693, Intracellular protease/amidase                                                             |
| RSc0599    |       |      |       |      | TRANSCRIPTION REGULATOR (GNTR FAMILY)                                                               |
| RSc0823    |       |      |       |      | HYPOTHETICAL PROTEIN                                                                                |
| RSc0831    |       |      |       |      | secA2 PREPROTEIN TRANSLOCASE SUBUNIT SecA (ATPase, RNA helicase) - RELATED PROTEIN                  |
| RSc0921    |       |      | -2.06 | 0.00 | ABC TRANSPORTER TRANSMEMBRANE PROTEIN                                                               |
| RSc0922    |       |      | -3.54 | 0.00 | ABC TRANSPORTER COG1464, ABC-type metal ion transport system, periplasmic component/surface antigen |
| RSc0962    |       |      | -3.16 | 0.00 | TRANSCRIPTION REGULATOR BACTERIOPHAGE DNA-BINDING PROTEIN                                           |
| RSc1013    |       |      |       |      | RIBOKINASE                                                                                          |
| RSc1023    | 0.25  | 0.89 | -2.07 | 0.00 | hscB CHAPERONE PROTEIN                                                                              |
| RSc1024    | 0.19  | 0.81 | -2.22 | 0.00 | hscA CHAPERONE PROTEIN                                                                              |
| RSc1025    | 0.42  | 0.53 | -2.04 | 0.00 | fdx FERREDOXIN [2FE-2S]                                                                             |
| RSc1026    |       |      | -2.09 | 0.00 | CONSERVED HYPOTHETICAL PROTEIN                                                                      |
| RSc1040    | 0.10  | 0.74 | -0.71 | 0.00 | rne RIBONUCLEASE E (RNASE E)                                                                        |
| RSc1171    | -0.03 | 0.65 | -2.51 | 0.00 | lysC ASPARTATE KINASE                                                                               |
| RSc1287    | -0.25 | 0.61 | -2.00 | 0.05 | CONSERVED HYPOTHETICAL PROTEIN                                                                      |
| RSc1341    | 0.14  | 0.98 | -2.21 | 0.01 | ssuB ABC TRANSPORTER ALIPHATIC SULFONATES ATP-BINDING PROTEIN                                       |
| RSc1673    |       |      | -2.93 | 0.00 | HYPOTHETICAL PROTEIN                                                                                |
| RSc1743    |       |      |       |      | HYPOTHETICAL PROTEIN                                                                                |
| RSc1863    |       |      | -5.13 | 0.00 | CONSERVED HYPOTHETICAL PROTEIN                                                                      |
| RSc2050    |       |      | -2.98 | 0.04 | nuoM OXIDOREDUCTASE TRANSMEMBRANE NADH DEHYDROGENASE I (CHAIN M)                                    |
| RSc2068    | 0.15  | 0.54 | -2.48 | 0.00 | SIGNAL PEPTIDE                                                                                      |
| RSc2678    | 0.32  | 0.18 | -2.75 | 0.01 | TRANSMEMBRANE TYPE 4 FIMBRIAL BIOGENESIS PILV-RELATED PROTEIN                                       |
| RSc2680    |       |      | -2.22 | 0.00 | TRANSMEMBRANE TYPE 4 FIMBRIAL BIOGENESIS PROTEIN                                                    |
| RSc2731    |       |      | -2.32 | 0.00 | panD ASPARTATE 1-DECARBOXYLASE PRECURSOR                                                            |
| RSc2861    |       |      |       |      | fruB MULTIPHOSPHORYL TRANSFER PROTEIN MTP                                                           |
| RSc2919    |       |      | -3.16 | 0.01 | TRANSMEMBRANE IRON TRANSPORT - SENSORY TRANSDUCTION PROTEIN                                         |
| RSc2955    | 0.26  | 0.62 | -2.36 | 0.02 | ABC TRANSPORTER COG0842, ABC-type multidrug transport system, permease component                    |
| RSc3027    | -0.20 | 0.40 | -2.35 | 0.04 | SIGNAL PEPTIDE                                                                                      |
| RSc3067    | 0.07  | 0.65 | -2.05 | 0.00 | TRANSMEMBRANE                                                                                       |
| RSc3168    |       |      | -3.16 | 0.00 | SRso1 ISRso13-TRANSPOSASE                                                                           |
| RSc3179    |       |      | 2.22  | 0.00 | TRANSPOSASE                                                                                         |
| RSc3386    |       |      | -1.74 | 0.01 | ABC TRANSPORTER COG1464, ABC-type metal ion transport system, periplasmic component/surface antigen |
| RSc3420    |       |      |       |      | HYPOTHETICAL PROTEIN                                                                                |
| RSp0005    |       |      | -2.11 | 0.00 | CONSERVED HYPOTHETICAL PROTEIN                                                                      |
| RSp0025    |       |      | -1.40 | 0.01 | HYPOTHETICAL PROTEIN                                                                                |
| RSp0147    |       |      |       |      | HYPOTHETICAL PROTEIN                                                                                |
| RSp0150    |       |      |       |      | TRANSMEMBRANE GENERAL SECRETION PATHWAY GSPG-RELATED PROTEIN                                        |
| RSp0175    |       |      | -2.12 | 0.00 | VGR-RELATED PROTEIN                                                                                 |
| RSp0176    |       |      |       |      | CONSERVED HYPOTHETICAL PROTEIN                                                                      |
| RSp0178    |       |      | -2.74 | 0.00 | HYPOTHETICAL PROTEIN                                                                                |
| RSp0244    | -0.86 | 0.05 | -3.14 | 0.01 | SIGNAL PEPTIDE OUTER MEMBRANE HEMIN RECEPTOR                                                        |
| RSp0285    |       |      |       |      | TRANSCRIPTION REGULATOR (LUXR FAMILY)                                                               |
| RSp0332    | -0.28 | 0.11 | -2.35 | 0.00 | acnB TRANSMEMBRANE ACONITATE HYDRATASE 2                                                            |
| RSp0456    |       |      | -2.28 | 0.03 | SIGNAL PEPTIDE                                                                                      |
| RSp0513    |       |      |       |      | TRANSMEMBRANE                                                                                       |
| RSp0545    | -0.10 | 0.59 | -2.17 | 0.00 | CONSERVED HYPOTHETICAL PROTEIN                                                                      |
| RSp0630    | 0.33  | 0.22 | -3.27 | 0.01 | PHOSPHOLIPASE                                                                                       |
| RSp0736    | 0.39  | 0.91 | -2.39 | 0.02 | TRANSMEMBRANE                                                                                       |
| RSp0741    |       |      | -1.40 | 0.00 | TRANSMEMBRANE                                                                                       |
| RSp0747    |       |      | -2.23 | 0.00 | CONSERVED HYPOTHETICAL PROTEIN                                                                      |
| RSp0749    |       |      | -2.31 | 0.00 | CLPA/B-TYPE CHAPERONE                                                                               |
| RSp0753    |       |      | -2.31 | 0.00 | TRANSMEMBRANE                                                                                       |
| RSp0754    |       |      |       |      | HYPOTHETICAL PROTEIN                                                                                |
| RSp0756    |       |      | -2.99 | 0.00 | HYPOTHETICAL PROTEIN                                                                                |
| RSp0773    |       |      | -2.57 | 0.00 | SIGNAL PEPTIDE                                                                                      |
| RSp1098    |       |      | -2.13 | 0.01 | TRANSCRIPTION REGULATOR HNS-LIKE PROTEIN                                                            |
| RSp1108    |       |      | -3.40 | 0.00 | SIGNAL PEPTIDE LIPASE                                                                               |
| RSp1147 RS | -0.58 | 0.55 | -2.32 | 0.00 | OXIDOREDUCTASE COG2085, Predicted dinucleotide-binding enzymes                                      |
| RSp1254    |       |      |       |      | pseudoge HIPA PROTEIN RELATED(FRAGMENT)                                                             |
| RSp1317    |       |      |       |      | TRANSCRIPTION REGULATOR (LRP/ASNC FAMILY)                                                           |
| RSp1322    | -0.14 | 0.41 | -2.14 | 0.00 | COG0251, Translation initiation inhibitor                                                           |
| RSp1323    | 0.16  | 0.58 | -2.92 | 0.01 | HYPOTHETICAL PROTEIN                                                                                |
| RSp1329    |       |      | -2.34 | 0.01 | TRANSMEMBRANE                                                                                       |
| RSp1353    |       |      | -2.72 | 0.00 | COG0251, Translation initiation inhibitor                                                           |
| RSp1354    | 0.16  | 0.92 | -2.09 | 0.01 | HYPOTHETICAL PROTEIN                                                                                |
| RSp1373    |       |      |       |      | nosL NOSL LIPOPROTEIN                                                                               |
| RSp1413    |       |      |       |      | flhD TRANSCRIPTION REGULATOR FLAGELLAR TRANSCRIPTIONAL ACTIVATOR                                    |
| RSp1550    |       |      | -2.31 | 0.00 | HYPOTHETICAL PROTEIN                                                                                |
| RSp1642    |       |      | -2.29 | 0.00 | TRANSMEMBRANE                                                                                       |
