# Supplementary material for: Integrated Regulation of the Type III Secretion System and Other Virulence Determinants in Ralstonia solanacearum
Source: PubMed Central journal article supplement (PMC1557829; doi:10.1371/journal.ppat.0020082), 2006-08-25
Supplement: ppat.0020082.st002.pdf [file ppat.0020082.st002.pdf]

| ID     | AC      | $\Delta$ hrpG | hrpB $\Delta$ | WT pAM5    | WTpBBL12   | hrpB $\Delta$ pBBL1 | Gene  | Description                                                                    | Class   |
|--------|---------|---------------|---------------|------------|------------|---------------------|-------|--------------------------------------------------------------------------------|---------|
| RS0001 | RS06178 |               |               | -0.30 0.04 |            | -1.09 0.00          | rpmH  | 50S RIBOSOMAL PROTEIN L34                                                      | III.C.2 |
| RS0002 | RS01824 |               |               | -0.57 0.01 |            | -1.52 0.01          | rnvA  | RIBONUCLEASE P PROTEIN COMPONENT                                               | II.A.2  |
| RS0003 | RS01825 |               | 0.38 0.04     | -0.38 0.05 |            | -1.06 0.00          |       | CONSERVED HYPOTHETICAL PROTEIN                                                 | V.I.C   |
| RS0004 | RS01826 |               |               |            | 0.89 0.00  | -0.58 0.02          | yidC  | TRANSMEMBRANE COG0706, Preprotein translocase subunit YidC                     | IV.E.2  |
| RS0005 | RS01827 |               | 0.46 0.02     |            |            |                     | thdF  | THIOPHENE AND FURAN OXIDATION PROTEIN                                          | IV.G.4  |
| RS0006 | RS01828 |               | 0.73 0.03     |            |            |                     |       | COG4551, Predicted protein tyrosine phosphatase                                | V.I.C   |
| RS0007 | RS01829 |               |               |            |            |                     |       | HYPOTHETICAL PROTEIN                                                           | VI.B    |
| RS0008 | RS01830 |               |               | -0.33 0.01 |            |                     | rpsU  | 30S RIBOSOMAL SUBUNIT PROTEIN S21                                              | III.C.2 |
| RS0009 | RS01831 |               |               |            |            |                     |       | DRUG EFFLUX LIPOPROTEIN                                                        | IV.D    |
| RS0010 | RS01832 |               |               | -0.22 0.01 | 1.88 0.02  |                     | acrB  | TRANSMEMBRANE ACRIFLAVIN RESISTANCE PROTEIN                                    | IV.D    |
| RS0011 | RS01833 |               |               |            |            | 0.69 0.04           | acrA  | ACRIFLAVIN RESISTANCE LIPOPROTEIN A PRECURSOR                                  | IV.G.2  |
| RS0012 | RS01834 |               |               | -0.54 0.00 | -0.91 0.02 | 1.24 0.00           | acrR  | TRANSCRIPTION REGULATOR ACRA B OPERON REPRESSOR                                | IV.G.2  |
| RS0013 | RS01835 |               |               | -0.44 0.00 | 1.43 0.01  |                     |       | CONSERVED HYPOTHETICAL PROTEIN                                                 | V.I.C   |
| RS0014 | RS01836 |               | -0.90 0.00    |            |            |                     | gor   | OXIDOREDUCTASE GLUTATHIONE REDUCTASE                                           | I.B.6   |
| RS0015 | RS01837 | -0.51 0.01    | 0.63 0.02     | -0.74 0.00 |            |                     |       | CONSERVED HYPOTHETICAL PROTEIN                                                 | V.I.C   |
| RS0016 | RS01838 |               |               | -0.30 0.01 |            |                     | serA  | OXIDOREDUCTASE D-3-PHOSPHOGLYCERATE DEHYDROGENASE                              | I.A.10  |
| RS0017 | RS01839 |               | 1.06 0.00     |            | 1.46 0.00  |                     | pckA  | PHOSPHOENOLPYRUVATE CARBOXYKINASE                                              | I.F.13  |
| RS0018 | RS01840 |               |               | -0.99 0.00 |            | -2.06 0.00          |       | TRANSCRIPTION REGULATOR RESPONSE REGULATOR                                     | V.I.A   |
| RS0019 | RS01841 |               |               | -0.82 0.00 | -1.37 0.00 | -1.94 0.00          |       | CONSERVED HYPOTHETICAL PROTEIN                                                 | V.I.C   |
| RS0020 | RS01842 |               | 1.25 0.00     | -0.87 0.01 |            |                     |       | COG3622, Hydroxypruvate isomerase                                              | I       |
| RS0021 | RS01843 |               |               |            |            |                     |       | TRANSCRIPTION REGULATOR TRANSMEMBRANE SENSOR HISTIDINE KINASE                  | V.I.A   |
| RS0022 | RS01844 |               |               | -0.82 0.00 | -1.01 0.01 | -1.24 0.00          | cstA  | TRANSMEMBRANE CARBON STARVATION PROTEIN A                                      | IV.F    |
| RS0023 | RS01845 |               |               | -1.06 0.00 | -1.21 0.00 |                     |       | CONSERVED HYPOTHETICAL PROTEIN                                                 | V.I.C   |
| RS0024 | RS01846 |               | 1.34 0.00     | -1.31 0.00 | -0.85 0.01 |                     |       | SIGNAL PEPTIDE                                                                 | V.I.C   |
| RS0025 | RS01848 |               |               |            | 0.81 0.00  | 0.72 0.04           | phaP2 | POLYHYDROXYBUTYRATE GRANULE-ASSOCIATED PROTEIN (PHASIN) PHAP2                  | II.B    |
| RS0026 | RS01849 |               | 0.72 0.00     |            |            |                     | metW  | METHIONINE BIOSYNTHESIS PROTEIN METW                                           | I.A.12  |
| RS0027 | RS01850 |               |               |            |            |                     | metX  | HOMOSERINE O-ACETYLTRANSFERASE                                                 | I.A.12  |
| RS0028 | RS01851 |               |               | -0.72 0.05 |            |                     | gabD1 | OXIDOREDUCTASE SUCCINATE-SEMIALDEHYDE DEHYDROGENASE                            | I.F.18  |
| RS0029 | RS01852 |               |               | -1.43 0.00 |            | 1.83 0.00           | goaG  | 4-AMINOBUTYRATE AMINOTRANSFERASE                                               | I.F.18  |
| RS0030 | RS01853 |               |               |            |            |                     |       | TRANSCRIPTION REGULATOR                                                        | V.I.A   |
| RS0031 | RS01854 |               |               | -0.64 0.00 | -0.42 0.04 |                     |       | TRANSCRIPTION REGULATOR                                                        | V.I.A   |
| RS0032 | RS01855 |               |               |            | -1.32 0.00 |                     |       | COG1011, Hydrolase                                                             | II      |
| RS0033 | RS01856 | -0.77 0.02    | 0.91 0.04     |            | 0.99 0.01  |                     | argB  | ACETYLGLUTAMATE KINASE                                                         | I.A.17  |
| RS0034 | RS01857 |               |               |            | 0.91 0.01  |                     |       | TRANSCRIPTION REGULATOR ECF-FAMILY RNA POLYMERASE SIGMA FACTOR I               | V.I.C   |
| RS0035 | RS01858 | 0.34 0.02     |               | -0.61 0.00 |            | 1.27 0.00           |       | CONSERVED HYPOTHETICAL PROTEIN                                                 | V.I.C   |
| RS0036 | RS01859 |               |               |            |            |                     |       | SIGNAL PEPTIDE                                                                 | VI.D    |
| RS0037 | RS01860 |               |               | -0.49 0.03 |            | 1.78 0.05           |       | HYPOTHETICAL PROTEIN                                                           | VI.D    |
| RS0038 | RS01861 |               | 0.47 0.01     | -0.68 0.01 |            | 0.90 0.03           |       | TRANSMEMBRANE                                                                  | V.I.C   |
| RS0039 | RS01862 |               |               |            | 0.40 0.05  |                     |       | TRANSCRIPTION REGULATOR TRANSMEMBRANE SENSOR HISTIDINE KINASE                  | V.I.A   |
| RS0040 | RS01863 |               |               |            | 2.43 0.00  |                     |       | TRANSCRIPTION REGULATOR RESPONSE REGULATOR                                     | V.I.A   |
| RS0041 | RS01864 |               | -1.92 0.00    | 2.19 0.03  | 2.43 0.00  |                     |       | HYPOTHETICAL PROTEIN                                                           | VI.D    |
| RS0042 | RS01865 |               | 1.12 0.03     |            |            | -1.45 0.00          | hslU  | HEAT SHOCK PROTEIN CHAPERONE                                                   | IV.F.1  |
| RS0043 | RS01866 |               |               |            |            | -0.72 0.00          | hslV  | HEAT SHOCK PROTEIN                                                             | II.A.4  |
| RS0044 | RS01867 |               |               | -0.53 0.02 |            |                     |       | ABC TRANSPORTER SUBSTRATE-BINDING PERIPLASMIC PROTEIN (BBP)                    | IV.D    |
| RS0045 | RS01868 |               | 1.01 0.02     | -0.93 0.00 |            |                     |       | COG0523, GTPase                                                                | V.I.C   |
| RS0046 | RS01869 |               |               |            |            |                     | dkxA  | DNAX SUPPRESSOR PROTEIN                                                        | II.B.8  |
| RS0047 | RS01870 |               |               | -1.36 0.00 |            |                     |       | COG0523, GTPase                                                                | V.I.C   |
| RS0048 | RS01871 |               |               | -0.94 0.00 |            |                     |       | TRANSCRIPTION REGULATOR                                                        | V.I.A   |
| RS0049 | RS01872 |               |               | -0.41 0.00 |            |                     |       | 3-CARBOXYMUCONATE CYCLASE                                                      | I       |
| RS0050 | RS01873 | -0.60 0.04    |               | -1.01 0.00 |            |                     |       | OXIDOREDUCTASE COG0277, FAD/FMN-containing dehydrogenase                       | I       |
| RS0051 | RS01874 |               | 1.47 0.01     | -1.08 0.00 |            |                     |       | COG1092, Predicted SAM-dependent methyltransferase                             | I       |
| RS0052 | RS01875 |               | 0.47 0.05     | -0.41 0.00 |            |                     |       | SITE SPECIFIC INTEGRASE/RECOMBINASE                                            | V.D     |
| RS0053 | RS01876 |               | 0.81 0.00     | -0.46 0.01 | 0.94 0.02  |                     |       | CONSERVED HYPOTHETICAL PROTEIN                                                 | V.I.C   |
| RS0054 | RS01877 |               |               |            | 0.53 0.03  |                     | gatB  | GLU-TRNAGLN AMIDOTRANSFERASE SUBUNIT B                                         | II.D.1  |
| RS0055 | RS01878 |               |               |            |            |                     |       | SIGNAL PEPTIDE COG0412, Dienelactone hydrolase and related enzymes             | I       |
| RS0056 | RS01879 |               |               | -0.51 0.04 |            |                     |       | LIPOPROTEIN                                                                    | V.I.C   |
| RS0057 | RS01880 |               |               |            |            |                     | gatA  | GLU-TRNA (GLN) AMIDOTRANSFERASE (SUBUNIT A)                                    | II.D.1  |
| RS0058 | RS01881 |               |               | -0.27 0.05 |            |                     | gatC  | GLUTAMYL-TRNA GLN AMIDOTRANSFERASE SUBUNIT C                                   | III.C.2 |
| RS0059 | RS01882 |               |               |            | 0.76 0.01  |                     | mreB  | ROD SHAPE-DETERMINING PROTEIN                                                  | III.B.3 |
| RS0060 | RS01883 |               |               |            |            |                     | mreC  | TRANSMEMBRANE ROD SHAPE-DETERMINING PROTEIN MREC                               | III.B.3 |
| RS0061 | RS01884 |               | 0.69 0.00     |            |            |                     | mreD  | TRANSMEMBRANE ROD SHAPE-DETERMINING PROTEIN MRED                               | III.B.3 |
| RS0062 | RS05767 |               |               | -0.55 0.00 | -1.14 0.03 |                     |       | TRANSMEMBRANE SUBSTRATE-BINDING PROTEIN                                        | III.B.3 |
| RS0063 | RS05768 |               |               |            |            |                     | mdrB  | TRANSMEMBRANE ROD SHAPE-DETERMINING PROTEIN (RODA PROTEIN)                     | IV.A    |
| RS0064 | RS05769 |               |               |            |            |                     |       | LONG-CHAIN-FATTY-ACID-CoA LIGASE                                               | I.I.1   |
| RS0065 | RS02244 |               |               | -0.63 0.00 |            |                     |       | TRANSCRIPTION REGULATOR                                                        | V.I.A   |
| RS0066 | RS02245 |               | 0.98 0.01     | -0.61 0.04 | 0.81 0.00  |                     | topB  | DNA TOPOISOMERASE III                                                          | II.B.8  |
| RS0067 | RS02246 |               | 1.05 0.05     | -0.67 0.00 |            |                     |       | THIOREDOXIN                                                                    | II.B.7  |
| RS0068 | RS02247 |               |               |            | -0.75 0.03 |                     | smf   | SMF PROTEIN (COG0758 Predicted Rossmann fold nucleotide-binding protein involv | VI.C    |
| RS0069 | RS02271 |               | 0.53 0.05     |            |            | -0.39 0.02          |       | SIGNAL PEPTIDE                                                                 | V.I.C   |
| RS0070 | RS02248 |               | 0.34 0.01     | -0.40 0.04 | -0.52 0.04 | -0.58 0.04          | def   | POLYPEPTIDE DEFORMYLASE                                                        | II.B.7  |
| RS0071 | RS02249 |               | 1.06 0.01     | -0.40 0.00 |            |                     |       | TRANSMEMBRANE                                                                  | V.I.C   |
| RS0072 | RS02250 |               | 0.62 0.00     |            |            |                     | fmt   | METHIONYL-TRNA FORMYLTRANSFERASE                                               | II.D.1  |
| RS0073 | RS02251 |               | -1.26 0.00    | 1.87 0.00  | 1.91 0.00  |                     |       | TRANSMEMBRANE TRANSPORTER                                                      | IV.D    |
| RS0074 | RS02252 |               |               |            | -0.71 0.01 |                     | htpX  | TRANSMEMBRANE METALLOPROTEASE ZINC                                             | II.A.4  |
| RS0075 | RS02273 | -0.82 0.02    |               | -0.30 0.01 |            |                     | rrmB  | RNA METHYLTRANSFERASE (SUN PROTEIN)                                            | II.B.6  |
| RS0076 | RS02253 |               | 0.44 0.05     | -0.61 0.00 |            | -0.04 0.04          |       | SIGNAL PEPTIDE PROLINE RICH PROTEIN                                            | V.I.C   |
| RS0077 | RS02275 |               |               | -0.75 0.02 |            |                     |       | TRANSCRIPTION REGULATOR TWO COMPONENT SENSOR HISTIDINE KINASE                  | V.I.A   |
| RS0078 | RS02276 |               |               | -0.51 0.00 |            |                     |       | TRANSCRIPTION REGULATOR TWO COMPONENT RESPONSE REGULATOR                       | V.I.A   |
| RS0079 | RS02277 |               |               | -0.42 0.01 |            |                     |       | TRANSMEMBRANE                                                                  | V.I.D   |
| RS0080 | RS02254 |               |               | -0.32 0.02 | -0.24 0.05 |                     |       | TRANSMEMBRANE                                                                  | V.I.D   |
| RS0081 | RS02255 |               |               |            | -1.35 0.03 |                     |       | TRANSCRIPTION REGULATOR COG1737, Transcriptional regulator                     | V.I.A   |
| RS0082 | RS02256 |               |               |            |            |                     |       | COG161, Adenosylmethionine-8-amino-7-oxononanoate aminotransferase             | I       |
| RS0083 | RS02257 |               |               | 0.15 0.05  |            |                     |       | CONSERVED HYPOTHETICAL PROTEIN                                                 | V.I.C   |
| RS0084 | RS02258 |               |               |            |            |                     |       | ABC TRANSPORTER AMINO-ACID-BINDING PERIPLASMIC PROTEIN (BBP)                   | IV.D.2  |
| RS0085 | RS02259 |               | 0.32 0.03     | -0.31 0.05 |            |                     | cca   | tRNA NUCLEOTIDYLTRANSFERASE                                                    | II.D.1  |
| RS0086 | RS02260 |               |               | -0.25 0.05 |            |                     | gstA  | GLUTATHIONE S-TRANSFERASE                                                      | II.B.7  |
| RS0087 | RS02261 |               | 0.45 0.05     |            |            |                     |       | OXIDOREDUCTASE NADH-UBIQUINONE OXIDOREDUCTASE                                  | I.H     |
| RS0088 | RS02278 |               |               |            |            |                     | slt   | TRANSMEMBRANE SOLUBLE LYTIC MUREIN TRANSLYCOSYLASE PRECURSOR                   | III.B.3 |
| RS0089 | RS02262 |               |               | -0.43 0.03 |            |                     |       | COG0212, 5-formyltetrahydrofolate cyclo-ligase                                 | I       |
| RS0090 | RS02263 |               |               | 0.82 0.00  |            | -0.88 0.01          |       | TRANSCRIPTION REGULATOR COG3070, Regulator of competence-specific genes        | V.I.A   |
| RS0091 | RS02264 |               |               | -0.45 0.02 |            | -0.80 0.01          | metF  | OXIDOREDUCTASE 5,10-METHYLENETETRAHYDROFOLATE REDUCTASE                        | I.A.12  |
| RS0092 | RS02279 |               |               |            |            | -0.69 0.05          |       | TRANSMEMBRANE                                                                  | V.I.C   |
| RS0093 | RS02265 |               |               | -0.63 0.00 |            | -1.52 0.00          | ahcY  | ADENOSYLHOMOCYSTEINASE (S-ADENOSYL-L-HOMOCYSTEINE HYDROLASE I                  | V.F     |
| RS0094 | RS02282 |               | 0.48 0.03     | -0.40 0.05 |            |                     |       | TRANSMEMBRANE LIPOPROTEIN                                                      | VI.D    |
| RS0095 | RS02285 |               |               |            |            |                     |       | CONSERVED HYPOTHETICAL PROTEIN                                                 | V.I.C   |
| RS0096 | RS06003 |               | -2.44 0.00    | 3.20 0.00  | 1.32 0.00  |                     |       | HYPOTHETICAL PROTEIN                                                           | VI.D    |
| RS0097 | RS02267 |               | 1.02 0.05     |            |            |                     |       | TRANSMEMBRANE ALKALINE PHOSPHATASE LIPOPROTEIN                                 | I.F.20  |
| RS0098 | RS02280 |               |               | -0.60 0.03 |            |                     |       | SIGNAL PEPTIDE ALKALINE PHOSPHATASE                                            | I.F.20  |
| RS0099 | RS02268 |               |               |            |            |                     |       | SIGNAL PEPTIDE                                                                 | VI.B    |
| RS0100 | RS02611 |               |               | -0.33 0.04 |            |                     | thiD  | BIFUNCTIONAL PROTEIN: HYDROXY-PHOSPHOMETHYLPIRIMIDINE KINASE                   | II.B.8  |
| RS0101 | RS02270 |               |               |            |            |                     |       | TRANSMEMBRANE LIPOPROTEIN                                                      | V.I.C   |
| RS0102 | RS05630 |               | -1.54 0.00    | 1.62 0.01  | -1.01 0.01 |                     |       | CALCIUM BINDING HEMOLYSIN                                                      | IV.G.3  |
| RS0104 | RS00975 | -0.75 0.01    |               | -0.55 0.05 |            |                     |       | HEMOLYSIN-TYPE CALCIUM-BINDING PROTEIN                                         | IV.G.3  |
| RS0105 | RS01614 |               |               |            |            |                     |       | HYPOTHETICAL PROTEIN                                                           | V.I.D   |
| RS0106 | RS01696 |               | 0.38 0.03     |            |            |                     |       | SIGNAL PEPTIDE                                                                 | V.I.D   |
| RS0107 | RS00977 |               |               | -0.61 0.01 |            | 2.08 0.00           |       | CONSERVED HYPOTHETICAL PROTEIN                                                 | V.I.C   |
| RS0108 | RS00978 |               |               |            |            |                     | thiE1 | THIAMINE-PHOSPHATE PYROPHOSPHORYLASE                                           | I.B.8   |
| RS0109 | RS00979 |               |               | -0.35 0.03 | -1.03 0.01 |                     | thiG  | THIF PROTEIN THIAMINE BIOSYNTHESIS                                             | I.B.8   |
| RS0111 | RS00981 |               |               | -0.36 0.04 |            |                     | thiS  | Sulfur transfer protein ThiS                                                   | I.B.8   |
| RS0112 | RS00982 |               |               |            | -1.16 0.05 | -0.60 0.02          |       | OXIDOREDUCTASE D-AMINO ACID OXIDASE FLAVOPROTEIN                               | I       |

|         |         |      |      |       |       |       |      |       |       |       |      |                                                                                     |         |
|---------|---------|------|------|-------|-------|-------|------|-------|-------|-------|------|-------------------------------------------------------------------------------------|---------|
| RSc0113 | RS00983 |      |      |       | -0.56 | 0.00  |      |       | -1.60 | 0.00  | thiC | THIAMINE BIOSYNTHESIS PROTEIN THI C THIAMINE BIOSYNTHESIS                           | I.B.8   |
| RSc0114 | RS00984 |      |      |       |       |       |      |       |       |       |      | OXIDOREDUCTASE DIOXYGENASE related to 2-nitropropane dioxygenase                    | I       |
| RSc0115 | RS00985 |      |      | 0.79  | 0.00  |       |      |       | 1.83  | 0.02  |      | HEMAGGLUTININ-RELATED AUTOTRANSPORTER PROTEIN                                       | III.A   |
| RSc0116 | RS00986 | 0.50 | 0.01 |       |       | -1.00 | 0.00 |       |       |       |      | CONSERVED HYPOTHETICAL PROTEIN                                                      | V.I.C   |
| RSc0117 | RS00987 |      |      |       |       | -0.52 | 0.04 |       |       |       |      | CONSERVED HYPOTHETICAL PROTEIN                                                      | V.I.C   |
| RSc0118 | RS00988 |      |      |       |       | -0.71 | 0.00 |       |       |       |      | CONSERVED HYPOTHETICAL PROTEIN                                                      | V.I.C   |
| RSc0119 | RS00989 |      |      |       |       | -0.59 | 0.00 |       | 1.22  | 0.00  |      | CONSERVED HYPOTHETICAL PROTEIN                                                      | V.I.C   |
| RSc0120 | RS00990 |      |      |       |       |       |      |       |       |       |      | HYPOTHETICAL/UNKNOWN                                                                | V.I.C   |
| RSc0121 | RS00991 |      |      |       |       | -0.42 | 0.04 |       |       |       |      | ACETYLTRANSFERASE                                                                   | V.I.C   |
| RSc0122 | RS00992 |      |      | 0.42  | 0.01  | -0.52 | 0.00 |       |       |       |      | OXIDOREDUCTASE ACYL-COA DEHYDROGENASE                                               | I       |
| RSc0123 | RS00993 |      |      | 0.32  | 0.04  | -0.67 | 0.00 |       |       |       |      | ABC TRANSPORTER SUBSTRATE-BINDING PERIPLASMIC PROTEIN (PBP)                         | I.V.D   |
| RSc0124 | RS00994 |      |      |       |       | -0.44 | 0.02 |       |       |       |      | OXIDOREDUCTASE COG2303, Choline dehydrogenase and related flavoproteins             | I       |
| RSc0125 | RS00995 |      |      |       |       |       |      |       |       |       |      | CONSERVED HYPOTHETICAL PROTEIN                                                      | V.I.C   |
| RSc0126 | RS00996 |      |      | -1.40 | 0.05  |       |      |       |       |       |      | TRANSCRIPTION REGULATOR COG2944, Transcriptional regulator                          | V.I.A   |
| RSc0127 | RS00997 |      |      | -0.86 | 0.05  |       |      |       |       |       |      | HYPOTHETICAL/UNKNOWN                                                                | V.I.D   |
| RSc0128 | RS00998 |      |      |       |       | 0.96  | 0.01 |       |       |       |      | HEMAGGLUTININ-RELATED PROTEIN                                                       | V.I.C   |
| RSc0129 | RS00999 |      |      |       |       | -0.20 | 0.03 |       |       |       |      | TRANSCRIPTION REGULATOR                                                             | V.I.A   |
| RSc0130 | RS01000 |      |      |       |       | -0.56 | 0.01 |       |       |       |      | GLUTATHIONE S-TRANSFERASE                                                           | I.I.B.7 |
| RSc0131 | RS01001 |      |      |       |       |       |      |       |       |       |      | TRANSMEMBRANE COG3448, CBS-domain-containing membrane protein                       | V.I.A   |
| RSc0132 | RS01002 |      |      |       |       |       |      |       |       |       |      | LIPOPROTEIN                                                                         | V.I.C   |
| RSc0133 | RS01003 |      |      |       |       | -0.49 | 0.00 |       |       |       |      | TRANSCRIPTION REGULATOR                                                             | I       |
| RSc0134 | RS01004 |      |      |       |       |       |      |       |       |       |      | CONSERVED HYPOTHETICAL PROTEIN                                                      | V.I.A   |
| RSc0135 | RS01005 |      |      |       |       | -0.46 | 0.00 |       | -0.64 | 0.00  | metK | S-ADENOSYLMETHIONINE SYNTHETASE                                                     | I.F     |
| RSc0136 | RS01006 |      |      |       |       |       |      |       |       |       |      | TRANSMEMBRANE ACYLTRANSFERASE                                                       | I.I.B   |
| RSc0137 | RS01049 |      |      |       |       |       |      |       |       |       |      | ACYLTRANSFERASE                                                                     | I.I.B   |
| RSc0138 | RS01008 |      |      |       |       | 0.65  | 0.04 |       |       |       | dapF | DIAMINOPIMELATE EPIMERASE                                                           | I.A.13  |
| RSc0139 | RS01009 |      |      |       |       |       |      |       |       |       |      | CONSERVED HYPOTHETICAL PROTEIN                                                      | V.I.C   |
| RSc0140 | RS01010 |      |      |       |       |       |      |       |       |       |      | OROTATE PHOSPHORIBOSYLTRANSFERASE                                                   | I.D.1   |
| RSc0141 | RS01011 |      |      |       |       | -0.29 | 0.02 |       |       |       |      | EXODEOXYRIBONUCLEASE III                                                            | I.I.A.1 |
| RSc0142 | RS01012 |      |      |       |       | -0.44 | 0.03 |       |       |       |      | TRANSMEMBRANE                                                                       | V.I.C   |
| RSc0143 | RS01013 |      |      |       |       | -0.60 | 0.00 |       |       |       |      | OXIDOREDUCTASE N-ACETYL-GAMMA-GLUTAMYL-PHOSPHATE REDUCTASE                          | I.A.17  |
| RSc0144 | RS01014 |      |      |       |       | -0.70 | 0.03 |       |       |       |      | CONSERVED HYPOTHETICAL PROTEIN                                                      | V.I.C   |
| RSc0145 | RS01015 |      |      |       |       | -0.58 | 0.05 |       |       |       |      | TRANSCRIPTION REGULATOR                                                             | V.I.A   |
| RSc0146 | RS01016 |      |      |       |       |       |      |       |       |       |      | TRANSMEMBRANE COG0330, Membrane protease subunit, stomatin/prohibitin hom           | I.I.A.4 |
| RSc0147 | RS01017 |      |      | 0.63  | 0.00  | -0.56 | 0.00 |       |       |       |      | TRANSMEMBRANE LIPOPROTEIN                                                           | V.I.C   |
| RSc0148 | RS01018 |      |      |       |       | -0.75 | 0.01 |       |       |       |      | SIGNAL PEPTIDE HYPOTHETICAL                                                         | V.I.B   |
| RSc0149 | RS01019 |      |      |       |       |       |      |       |       |       |      | HYPOTHETICAL/UNKNOWN                                                                | V.I.D   |
| RSc0150 | RS01020 |      |      |       |       | -0.57 | 0.01 |       |       |       |      | TRANSCRIPTION REGULATOR                                                             | V.I.A   |
| RSc0151 | RS01021 |      |      |       |       | -0.74 | 0.02 | -0.44 | 0.03  |       |      | CONSERVED HYPOTHETICAL PROTEIN                                                      | V.I.C   |
| RSc0152 | RS01022 |      |      |       |       | -1.73 | 0.02 | -1.63 | 0.00  |       |      | TRANSMEMBRANE                                                                       | V.I.C   |
| RSc0153 | RS01023 |      |      |       |       | -0.68 | 0.00 |       |       |       |      | LIPOPROTEIN                                                                         | V.I.D   |
| RSc0154 | RS01024 |      |      |       |       |       |      |       |       |       |      | SIGNAL PEPTIDE COG0501, Zn-dependent protease with chaperone function               | I.I.A.4 |
| RSc0155 | RS01025 |      |      |       |       |       |      |       |       |       |      | TRANSMEMBRANE TRANSPORT protein                                                     | I.V.D   |
| RSc0156 | RS01026 |      |      |       |       |       |      |       |       |       |      | CONSERVED HYPOTHETICAL PROTEIN                                                      | V.I.C   |
| RSc0157 | RS01027 |      |      | 0.40  | 0.03  | -0.27 | 0.02 |       |       |       |      | OXIDOREDUCTASE COG1028, Dehydrogenases with different specificities (related t      | I       |
| RSc0158 | RS01028 |      |      |       |       |       |      |       |       |       |      | HYPOTHETICAL PROTEIN                                                                | I.F     |
| RSc0159 | RS01029 |      |      |       |       | -1.24 | 0.00 |       |       |       |      | ARGINASE                                                                            | I.I.3   |
| RSc0160 | RS01030 |      |      |       |       | -1.33 | 0.00 |       |       |       |      | ACETYLMETHYLAMINE AMINOTRANSFERASE                                                  | I.I.3   |
| RSc0161 | RS01031 |      |      |       |       | 0.81  | 0.01 |       |       |       |      | TRANSCRIPTION REGULATOR                                                             | V.I.A   |
| RSc0162 | RS01032 |      |      |       |       |       |      |       |       |       |      | OXIDOREDUCTASE TRANSMEMBRANE ALDEHYDE DEHYDROGENASE                                 | I       |
| RSc0163 | RS01033 |      |      |       |       | -1.59 | 0.00 | 0.91  | 0.00  | -1.71 | 0.00 | TRANSCRIPTION REGULATOR                                                             | V.I.A   |
| RSc0164 | RS01034 |      |      |       |       | -1.64 | 0.00 |       |       | -1.17 | 0.00 | CONSERVED HYPOTHETICAL PROTEIN                                                      | V.I.C   |
| RSc0165 | RS01035 |      |      |       |       | -0.87 | 0.00 |       |       |       |      | ABC TRANSPORTER ATP-BINDING PROTEIN                                                 | I.V.D   |
| RSc0166 | RS01036 |      |      | 0.58  | 0.04  | -0.44 | 0.00 |       |       |       |      | ABC TRANSPORTER ABC-type multidrug transport system, permease component             | I.V.D   |
| RSc0167 | RS01037 |      |      |       |       |       |      |       |       |       |      | Outer membrane channel lipoprotein                                                  | I.V.D   |
| RSc0168 | RS01038 |      |      |       |       | 0.59  | 0.01 | -0.88 | 0.00  |       |      | SIGNAL PEPTIDE                                                                      | V.I.C   |
| RSc0169 | RS01039 |      |      |       |       | 1.19  | 0.01 | -0.51 | 0.00  |       |      | CONSERVED HYPOTHETICAL PROTEIN                                                      | V.I.C   |
| RSc0170 | RS01040 |      |      |       |       | 1.13  | 0.01 |       |       |       |      | COG0451, Nucleoside-diphosphate-sugar epimerase                                     | I       |
| RSc0171 | RS01042 |      |      |       |       | 0.53  | 0.03 |       |       |       |      | TRANSMEMBRANE                                                                       | V.I.C   |
| RSc0172 | RS01043 |      |      |       |       |       |      |       |       |       |      | OXIDOREDUCTASE COG0300, Short-chain dehydrogenases of various substrate spe         | I       |
| RSc0173 | RS01044 |      |      |       |       | 1.97  | 0.04 |       |       |       |      | TRANSMEMBRANE COG0277, FAD/FMN-containing dehydrogenase                             | I       |
| RSc0174 | RS01045 |      |      |       |       | 0.73  | 0.02 | -0.24 | 0.04  |       |      | TRANSMEMBRANE PROTEIN WITH COG0382, 4-hydroxybenzoate polyphenyltransf              | I       |
| RSc0175 | RS01046 |      |      |       |       | -0.62 | 0.02 |       |       |       |      | OXIDOREDUCTASE COG1893, Ketopantoate reductase                                      | I       |
| RSc0176 | RS01047 |      |      |       |       | -0.20 | 0.01 |       |       |       |      | COG0037, Predicted ATPase of the PP-loop superfamily implicated in cell cycle contr | I.V.A   |
| RSc0177 | RS01048 |      |      |       |       | -0.55 | 0.01 |       |       |       |      | LIPOPROTEIN                                                                         | V.I.C   |
| RSc0178 | RS00609 |      |      |       |       | 0.58  | 0.00 |       |       | 0.98  | 0.02 | UDP-N-ACETYLGALUCOSAMINE PYROPHOSPHORYLASE                                          | I.F.10  |
| RSc0179 | RS00610 |      |      |       |       | 0.53  | 0.00 |       |       |       |      | GLUCOSAMINE-FRUCTOSE-6-PHOSPHATE AMINOTRANSFERASE                                   | I.F.8   |
| RSc0180 | RS00611 |      |      |       |       |       |      |       |       |       |      | COG0589, Universal stress protein UspA and related nucleotide-binding proteins      | V.I.C   |
| RSc0181 | RS00612 |      |      |       |       |       |      |       |       |       |      | PSEUDOGENE (ALCOHOL DEHYDROGENASE C-TERMINAL FRAGMENT)                              | V.I.C   |
| RSc0182 | RS00613 |      |      |       |       |       |      |       |       |       |      | PSEUDOGENE (ALCOHOL DEHYDROGENASE N-TERMINAL FRAGMENT)                              | V.I.C   |
| RSc0183 | RS00614 |      |      |       |       | 1.38  | 0.00 | 1.90  | 0.01  |       |      | TRANSMEMBRANE                                                                       | V.I.C   |
| RSc0184 | RS00615 |      |      |       |       |       |      |       |       |       |      | Signal-transduction protein containing a CBS domain                                 | V.I.A   |
| RSc0185 | RS00616 |      |      |       |       | -0.24 | 0.05 |       |       |       |      | COG0589, Universal stress protein UspA and related nucleotide-binding proteins      | V.I.C   |
| RSc0186 | RS00617 |      |      |       |       |       |      |       |       |       |      | Universal stress protein UspA and related nucleotide-binding proteins               | V.I.C   |
| RSc0187 | RS00618 |      |      |       |       |       |      |       |       |       |      | COG2823, Periplasmic or secreted lipoprotein                                        | V.I.C   |
| RSc0188 | RS00619 |      |      |       |       |       |      |       |       |       |      | COG0716, Flavodoxin                                                                 | I       |
| RSc0189 | RS00621 |      |      |       |       |       |      |       |       |       |      | HYPOTHETICAL PROTEIN                                                                | V.I.B   |
| RSc0190 | RS00622 |      |      |       |       |       |      |       |       |       |      | COG2823, Periplasmic or secreted lipoprotein                                        | V.I.C   |
| RSc0191 | RS00623 |      |      |       |       | -1.12 | 0.05 |       |       |       |      | TRANSCRIPTION REGULATOR                                                             | V.I.A   |
| RSc0192 | RS00624 |      |      |       |       |       |      |       |       |       |      | TRANSCRIPTION REGULATOR TRANSMEMBRANE TWO COMPONENT SYSTEM                          | V.I.A   |
| RSc0193 | RS00625 |      |      |       |       |       |      |       |       |       |      | TRANSCRIPTION REGULATOR RESPONSE REGULATOR                                          | V.I.A   |
| RSc0194 | RS00626 |      |      |       |       |       |      |       |       |       |      | HYPOTHETICAL PROTEIN                                                                | V.I.D   |
| RSc0195 | RS00627 |      |      |       |       |       |      |       |       |       |      | OXIDOREDUCTASE ZINC-DEPENDENT ALCOHOL DEHYDROGENASE                                 | I       |
| RSc0196 | RS00628 |      |      |       |       |       |      |       |       |       |      | OXIDOREDUCTASE RIBONUCLEOTIDE REDUCTASE, alpha subunit                              | I       |
| RSc0197 | RS00629 |      |      |       |       | -1.14 | 0.02 | -0.49 | 0.02  |       |      | SIGNAL PEPTIDE CYTOCHROME C1                                                        | I.G.1   |
| RSc0198 | RS00630 |      |      |       |       |       |      | -0.85 | 0.03  |       |      | SIGNAL PEPTIDE CYTOCHROME C                                                         | I.G.1   |
| RSc0199 | RS00631 |      |      |       |       |       |      | -0.77 | 0.01  |       |      | TRANSMEMBRANE                                                                       | V.I.C   |
| RSc0200 | RS00632 |      |      |       |       |       |      |       |       |       |      | TRANSMEMBRANE CYTOCHROME B561 CYTOCHROME                                            | I.G.1   |
| RSc0201 | RS00633 |      |      |       |       |       |      |       |       |       |      | SMALL HEAT SHOCK PROTEIN                                                            | I.V.F.1 |
| RSc0202 | RS00634 |      |      |       |       |       |      |       |       |       |      | COG1236, Exonuclease of the beta-lactamase fold involved in RNA processing          | I.I.B.6 |
| RSc0203 | RS00635 |      |      |       |       |       |      |       |       |       |      | RIBOSE-PHOSPHATE PYROPHOSPHOKINASE                                                  | I.D.2   |
| RSc0204 | RS00636 |      |      |       |       |       |      |       |       |       |      | CONSERVED HYPOTHETICAL PROTEIN                                                      | V.I.C   |
| RSc0205 | RS00637 |      |      |       |       | -1.39 | 0.05 |       |       |       |      | THYMIDINE/PYRIMIDINE-NUCLEOSIDE PHOSPHORYLASE                                       | I.F.1   |
| RSc0206 | RS00638 |      |      |       |       |       |      | 0.40  | 0.05  | -0.74 | 0.01 | TRANSCRIPTION REGULATOR                                                             | V.I.A   |
| RSc0207 | RS00639 |      |      |       |       |       |      |       |       | -0.77 | 0.05 | SIGNAL PEPTIDE COG1073, Hydrolase of the alpha/beta superfamily                     | I.I     |
| RSc0208 | RS00640 |      |      |       |       |       |      |       |       |       |      | TRANSMEMBRANE TRANSPORTER                                                           | I.V.D   |
| RSc0209 | RS00641 |      |      |       |       |       |      |       |       |       |      | TRANSMEMBRANE                                                                       | V.I.D   |
| RSc0210 | RS00642 |      |      |       |       |       |      |       |       |       |      | TRANSCRIPTION REGULATOR                                                             | V.I.A   |
| RSc0211 | RS00643 |      |      |       |       |       |      |       |       |       |      | TRANSMEMBRANE                                                                       | V.I.D   |
| RSc0212 | RS00644 |      |      |       |       |       |      | -0.45 | 0.00  | 0.87  | 0.01 | ASPARTATE RACEMASE                                                                  | I.A.15  |
| RSc0213 | RS00645 |      |      |       |       |       |      | -0.77 | 0.03  |       |      | GLUTAMINE AMIDOTRANSFERASE                                                          | I.D.2   |
| RSc0214 | RS00646 |      |      |       |       |       |      |       |       |       |      | TRANSCRIPTION REGULATOR                                                             | V.I.A   |
| RSc0215 | RS00647 |      |      |       |       |       |      |       |       |       |      | OXIDOREDUCTASE COG1028, Dehydrogenases with different specificities (related t      | I       |
| RSc0216 | RS00648 |      |      |       |       |       |      |       |       |       |      | TRANSMEMBRANE TRANSPORT PROTEIN                                                     | I.V.D   |
| RSc0217 | RS00649 |      |      |       |       |       |      | -1.19 | 0.00  | 4.10  | 0.00 | OXIDOREDUCTASE COG0667, Oxidoreductase (related to aryl-alcohol dehydrogena         | I       |
| RSc0218 | RS00650 |      |      |       |       |       |      | -0.87 | 0.03  | 3.20  | 0.00 | HYPOTHETICAL/UNKNOWN                                                                | V.I.D   |
| RSc0219 | RS00651 |      |      |       |       |       |      | -1.02 | 0.00  |       |      | COG1254, ACYLPHOSPHATASE                                                            | I.H     |
| RSc0220 | RS00652 |      |      |       |       |       |      | -0.68 | 0.02  |       |      | COG4101, Predicted mannose-6-phosphate isomerase                                    | I.F.4   |
| RSc0221 | RS00653 |      |      |       |       |       |      |       |       |       |      | TRANSMEMBRANE COG1752, Esterase of the alpha-beta hydrolase superfamily             | I       |
| RSc0222 | RS00654 |      |      |       |       | -1.91 | 0.00 | -1.83 | 0.01  |       |      | TRANSCRIPTION REGULATOR SIGMA-54 INTERACTING PROTEIN                                | I.I.B.6 |
| RSc0223 | RS00655 |      |      |       |       |       |      | -1.23 | 0.00  | -1.32 | 0.00 | HYPOTHETICAL/UNKNOWN                                                                | V.I.D   |
| RSc0224 | RS00656 |      |      |       |       |       |      | -0.91 | 0.00  | -0.37 | 0.00 | TRANSMEMBRANE                                                                       | V.I.C   |
| RSc0225 | RS00657 |      |      |       |       |       |      | -0.80 | 0.00  |       |      | COG3541, Nucleotidyltransferase                                                     | I.D     |

|         |         |      |       |       |       |       |       |       |      |         |                                                                                  |         |
|---------|---------|------|-------|-------|-------|-------|-------|-------|------|---------|----------------------------------------------------------------------------------|---------|
| RSc0226 | RS00658 |      |       |       |       |       |       |       |      | rtcA    | RNA 3'-TERMINAL PHOSPHATE CYCLASE                                                | II.B.6  |
| RSc0227 | RS06016 | 0,64 | 0,00  | -0,45 | 0,00  |       |       |       |      |         | REMNANT OF A AVRPM1A1/AVRPP1A1 GENE HOMOLOG                                      | VI.B    |
| RSc0228 | RS00660 |      |       |       |       |       |       |       |      |         | REMNANT OF A AVRPM1A1/AVRPP1A1 GENE HOMOLOG                                      | VI.B    |
| RSc0229 | RS00661 | 0,42 | 0,00  | -0,55 | 0,00  |       |       |       |      |         | TRANSCRIPTION REGULATOR COG1167, Transcriptional regulators containing a DVI     | VI.A    |
| RSc0230 | RS00663 |      |       | -0,58 | 0,04  |       |       |       |      |         | TRANSMEMBRANE                                                                    | VI.C    |
| RSc0231 | RS00662 |      | -0,54 | 0,03  |       | 1,15  | 0,00  |       |      |         | TRANSMEMBRANE (HOMOSERINE/HOMOSERINE LACTONE) EFFLUX PROTEIN                     | IV.D.2  |
| RSc0232 | RS00664 | 1,16 | 0,01  | -1,13 | 0,00  | 1,89  | 0,00  | 4,53  | 0,00 |         | HYPOTHETICAL PROTEIN                                                             | VI.B    |
| RSc0233 | RS00665 |      |       |       |       |       |       |       |      |         | TRANSMEMBRANE INTEGRAL MEMBRANE PROTEIN                                          | VI.C    |
| RSc0234 | RS00666 |      |       | -0,90 | 0,00  | -0,96 | 0,02  |       |      |         | TRANSCRIPTION REGULATOR                                                          | VI.A    |
| RSc0235 | RS00667 |      |       |       |       |       |       |       |      |         | CONSERVED HYPOTHETICAL PROTEIN                                                   | VI.C    |
| RSc0236 | RS00668 |      | 0,39  | 0,02  | -0,65 | 0,02  | 1,53  | 0,01  |      |         | SIGNAL PEPTIDE HYPOTHETICAL/UNKNOWN                                              | VI.D    |
| RSc0237 | RS00669 |      |       |       |       |       |       |       |      |         | METHYLMALONYL-CoA MUTASE                                                         | I       |
| RSc0238 | RS00670 |      |       | -1,06 | 0,01  |       | 1,31  | 0,00  |      |         | TRANSMEMBRANE PUTATIVE PERMEASE                                                  | IV.D    |
| RSc0239 | RS00671 |      |       |       |       |       |       |       |      |         | COG1574, Predicted metal-dependent hydrolase with the TIM-barrel fold            | II      |
| RSc0240 | RS00672 |      |       |       |       |       |       |       |      |         | TRANSMEMBRANE                                                                    | VI.C    |
| RSc0241 | RS00673 |      | -0,71 | 0,03  |       |       |       |       |      |         | TRANSMEMBRANE                                                                    | VI.C    |
| RSc0242 | RS00674 |      |       |       |       |       |       |       |      |         | COG1335, Amidase related to nicotinamidase                                       | II      |
| RSc0243 | RS00675 |      |       |       |       | -0,96 | 0,05  |       |      |         | TRANSCRIPTION REGULATOR TRANSCRIPTIONAL REGULATOR                                | VI.A    |
| RSc0244 | RS00676 |      | 0,68  | 0,00  | -0,77 | 0,00  |       |       |      |         | OXIDOREDUCTASE 3-HYDROXYBUTYRYL-CoA DEHYDROGENASE                                | II      |
| RSc0245 | RS00677 |      | -3,22 | 0,00  | 3,59  | 0,00  | 3,16  | 0,00  |      | paaH1   | TYPE III EFFECTOR RIBP                                                           | VI.E    |
| RSc0246 | RS00678 |      |       |       |       |       |       |       |      | ripB    | CALCIUM BINDING HEMOLYSIN                                                        | IV.G.3  |
| RSc0247 | RS00679 |      | 0,65  | 0,04  | -0,86 | 0,00  | -0,96 | 0,01  |      | tISRso6 | ISRS06-TRANSPOSASE ORFA                                                          | VI.B    |
| RSc0248 | RS00680 |      | 0,68  | 0,05  | -0,29 | 0,00  |       |       |      | tISRso6 | ISRS06-TRANSPOSASE ORFB                                                          | VI.B    |
| RSc0249 | RS00683 |      |       |       | -0,38 | 0,04  |       |       |      |         | CALCIUM BINDING HEMOLYSIN                                                        | IV.G.3  |
| RSc0250 | RS00684 |      |       |       |       |       |       |       |      |         | CONSERVED HYPOTHETICAL PROTEIN                                                   | VI.C    |
| RSc0251 | RS00685 |      | -1,29 | 0,02  | 1,16  | 0,00  |       |       |      |         | SIGNAL PEPTIDE                                                                   | VI.D    |
| RSc0253 | RS00688 |      |       |       |       |       |       |       |      |         | COG0384 PREDICTED EPIMERASE (PHENAZINE BIOSYNTHESIS PROTEIN)                     | I       |
| RSc0254 | RS00689 |      |       |       | -0,55 | 0,00  | 0,71  | 0,03  |      |         | TRANSMEMBRANE                                                                    | VI.C    |
| RSc0255 | RS00690 |      |       |       | -0,65 | 0,00  |       |       |      |         | COG2070, Dioxxygenases related to 2-nitropropane dioxxygenase                    | I       |
| RSc0256 | RS00691 |      |       |       | -0,84 | 0,00  |       |       |      |         | HALOACETATE DEHALOGENASE H-1                                                     | II.A    |
| RSc0257 | RS00692 |      | -4,07 | 0,00  | 6,98  | 0,00  | 5,13  | 0,00  |      | dehH    | ANKYRIN REPEAT HARBORING PROTEIN                                                 | VI.B    |
| RSc0258 | RS00693 |      |       |       |       |       |       |       |      |         | BETA LACTAMASE                                                                   | IV.G.4  |
| RSc0259 | RS00694 |      |       |       |       |       |       |       |      |         | COG3133, Fe-S protein                                                            | VI.C    |
| RSc0260 | RS00695 |      |       |       |       |       |       |       |      |         | CONSERVED HYPOTHETICAL PROTEIN                                                   | VI.C    |
| RSc0261 | RS00696 |      | 0,53  | 0,05  |       |       |       |       |      |         | CONSERVED HYPOTHETICAL PROTEIN                                                   | VI.C    |
| RSc0262 | RS00697 |      | -0,53 | 0,01  |       |       |       |       |      |         | OXIDOREDUCTASE COG0111, Phosphoglycerate dehydrogenase and related dehyd         | I       |
| RSc0263 | RS00698 |      |       |       |       |       |       |       |      |         | HYPOTHETICAL PROTEIN                                                             | VI.D    |
| RSc0264 | RS00699 |      | 0,32  | 0,03  |       |       |       |       |      |         | HYPOTHETICAL PROTEIN                                                             | VI.B    |
| RSc0265 | RS05771 |      |       |       |       |       |       |       |      |         | COG4770, Acetyl/propionyl-CoA carboxylase, alpha subunit                         | I       |
| RSc0266 | RS03233 |      | 0,56  | 0,05  |       |       |       |       |      | bioB    | BIOTIN SYNTHASE                                                                  | II.B.15 |
| RSc0267 | RS03234 |      |       |       | -0,72 | 0,03  | -0,34 | 0,03  |      |         | ENOYL-CoA HYDRATASE                                                              | I.A.4   |
| RSc0268 | RS03235 |      |       |       |       |       |       |       |      |         | SIGNAL PEPTIDE COG0412, Dienelactone hydrolase and related enzymes               | I       |
| RSc0269 | RS03236 |      | 0,81  | 0,00  | -0,34 | 0,03  |       |       |      |         | COG4799, Acetyl-Coa carboxylase, carboxyltransferase component (subunits alpha & | I       |
| RSc0270 | RS03237 |      |       |       | -0,26 | 0,01  | 0,88  | 0,04  |      |         | CONSERVED HYPOTHETICAL PROTEIN                                                   | VI.C    |
| RSc0271 | RS03238 |      | 0,70  | 0,05  |       |       |       |       |      |         | COG0637, Phosphatase/phosphohexomutase                                           | I       |
| RSc0272 | RS03239 |      |       |       |       |       |       |       |      |         | COG0607, Rhodanese-related sulfurtransferase                                     | I       |
| RSc0273 | RS03240 |      | 0,95  | 0,04  |       |       |       |       |      |         | 2-HYDROXYCHROMENE-2-CARBOXYLATE ISOMERASE                                        | II.A    |
| RSc0274 | RS03241 |      | -1,05 | 0,01  |       |       |       | 0,76  | 0,00 |         | OXIDOREDUCTASE ACYL CoA DEHYDROGENASE                                            | I       |
| RSc0275 | RS03242 |      | 0,72  | 0,02  |       |       |       |       |      |         | OXIDOREDUCTASE COG0300, Short-chain dehydrogenases of various substrate spe      | I       |
| RSc0276 | RS03243 |      |       |       |       |       |       |       |      |         | ACETYL-CoA ACETYLTRANSFERASE (ACETOACETYL-CoA THIOLASE)                          | II.1    |
| RSc0277 | RS03244 |      | 0,70  | 0,02  |       |       |       |       |      |         | CARBONIC ANHYDRASE                                                               | I.F.18  |
| RSc0278 | RS03245 |      |       |       | -0,26 | 0,00  |       |       |      | aceK    | TRANSMEMBRANE MULTIFUNCTIONAL ENZYME : ISOCITRATE DEHYDROGENA                    | I.F.17  |
| RSc0279 | RS03246 |      |       |       |       |       |       |       |      |         | OXIDOREDUCTASE ACYL-CoA DEHYDROGENASE                                            | II.3    |
| RSc0280 | RS03247 |      |       |       | -0,51 | 0,00  |       |       |      |         | TRANSCRIPTION REGULATOR                                                          | VI.A    |
| RSc0281 | RS03248 |      | 1,00  | 0,01  |       |       |       |       |      |         | COG0491, Zn-dependent hydrolases, including glyoxylases                          | II      |
| RSc0282 | RS03249 |      |       |       |       |       |       |       |      |         | CONSERVED HYPOTHETICAL PROTEIN                                                   | VI.C    |
| RSc0283 | RS03250 |      |       |       | -0,36 | 0,00  |       |       |      |         | ABC TRANSPORTER COG0614, ABC-type Fe3+-hydroxamate transport system, peri        | IV.D.5  |
| RSc0284 | RS03251 |      |       |       | -0,41 | 0,00  |       |       |      |         | OXIDOREDUCTASE COG0300, Short-chain dehydrogenases of various substrate spe      | I       |
| RSc0285 | RS03252 |      |       |       | -0,40 | 0,00  |       |       |      |         | SIGNAL PEPTIDE THIOL-DISULFIDE INTERCHANGE PROTEIN                               | II.B.7  |
| RSc0286 | RS03253 |      | 0,60  | 0,04  | -0,37 | 0,01  | 0,59  | 0,02  |      | dsbA1   | TRANSMEMBRANE Cell division protein FtsN                                         | IV.A    |
| RSc0287 | RS03254 |      |       |       |       |       |       |       |      |         | ARGINYL-TRNA SYNTHETASE (ARGININE--TRNA LIGASE)                                  | II.D.1  |
| RSc0288 | RS03255 |      |       |       | -0,42 | 0,04  |       | 0,61  | 0,00 |         | CONSERVED HYPOTHETICAL PROTEIN                                                   | VI.C    |
| RSc0289 | RS03256 |      |       |       | -0,70 | 0,01  |       |       |      |         | TRANSCRIPTION REGULATOR TRANSMEMBRANE SENSOR KINASE VSRA                         | I.E.1   |
| RSc0290 | RS03257 |      | -0,31 | 0,01  | -0,34 | 0,04  |       |       |      |         | COG5510 : Predicted small secreted protein                                       | III.A   |
| RSc0291 | RS03258 |      |       |       | -0,51 | 0,00  |       |       |      |         | TRANSCRIPTION REGULATOR                                                          | VI.A    |
| RSc0292 | RS03259 |      |       |       | -0,52 | 0,00  |       |       |      |         | TRANSCRIPTION REGULATOR RESPONSE REGULATOR                                       | I.E.1   |
| RSc0293 | RS03260 |      |       |       | -0,45 | 0,01  | 1,13  | 0,00  | 2,70 | 0,00    | SIGNAL PEPTIDE                                                                   | VI.D    |
| RSc0294 | RS03261 |      |       |       |       |       |       |       |      | metHb   | 5-METHYLTETRAHYDROFOLATE--HOMOCYSTEINE METHYLTRANSFERASE (MII                    | A.12    |
| RSc0295 | RS03262 |      | 0,41  | 0,01  | -0,38 | 0,05  |       |       |      | metHa   | 5-METHYLTETRAHYDROFOLATE--HOMOCYSTEINE METHYLTRANSFERASE (MII                    | A.12    |
| RSc0296 | RS03263 |      |       |       | -0,66 | 0,01  | -0,66 | 0,02  | 1,52 | 0,02    | COG0607, Rhodanese-related sulfurtransferase                                     | I       |
| RSc0297 | RS03264 |      |       |       | -1,66 | 0,00  | -1,94 | 0,00  |      |         | CONSERVED HYPOTHETICAL PROTEIN                                                   | VI.C    |
| RSc0298 | RS03265 |      | 0,32  | 0,03  |       |       | -1,11 | 0,05  |      | pcaD2   | B-KETOADIPATE ENOL-LACTONE HYDROLASE                                             | II.A    |
| RSc0299 | RS03266 |      | 0,88  | 0,01  | -0,27 | 0,05  | 0,91  | 0,04  |      |         | SIGNAL PEPTIDE PROLIN-RICH PROTEIN                                               | VI.C    |
| RSc0300 | RS03267 |      |       |       | -0,35 | 0,00  |       |       |      |         | TRANSCRIPTION REGULATOR                                                          | VI.A    |
| RSc0301 | RS03268 |      | 1,75  | 0,01  | -0,34 | 0,02  |       |       |      |         | OXIDOREDUCTASE COG0179, 2-keto-4-pentenolate hydratase/2-oxohepta-3-ene-1,7      | I       |
| RSc0302 | RS03269 |      |       |       | -1,17 | 0,00  |       |       |      |         | TRANSCRIPTION REGULATOR                                                          | VI.A    |
| RSc0303 | RS03270 |      |       |       | -1,52 | 0,00  | -1,62 | 0,01  |      |         | CONSERVED HYPOTHETICAL PROTEIN                                                   | VI.C    |
| RSc0304 | RS03271 |      | 0,65  | 0,02  |       |       |       |       |      |         | ENOYL-CoA HYDRATASE                                                              | II.A    |
| RSc0305 | RS03272 |      |       |       | 0,45  | 0,04  | 1,53  | 0,00  |      |         | CONSERVED HYPOTHETICAL PROTEIN                                                   | VI.C    |
| RSc0306 | RS03273 |      |       |       |       |       |       |       |      |         | COG1752, Esterase of the alpha-beta hydrolase superfamily                        | I       |
| RSc0307 | RS03274 |      |       |       | -0,58 | 0,00  |       |       |      |         | GLUTATHIONE PEROXIDASE                                                           | II.B.7  |
| RSc0308 | RS03275 |      | 0,43  | 0,01  | -0,55 | 0,04  |       |       |      |         | CONSERVED HYPOTHETICAL PROTEIN                                                   | VI.C    |
| RSc0309 | RS03276 |      |       |       |       |       |       |       |      |         | CONSERVED HYPOTHETICAL PROTEIN                                                   | VI.C    |
| RSc0310 | RS03277 |      |       |       |       |       |       |       |      |         | SIGNAL PEPTIDE                                                                   | VI.C    |
| RSc0311 | RS03278 |      |       |       | -0,39 | 0,01  | -0,61 | 0,02  |      |         | TRANSCRIPTION REGULATOR TRANSCRIPTION REGULATION ACCESSORY FA                    | VI.A    |
| RSc0312 | RS03279 |      |       |       |       |       |       |       |      |         | BIFUNCTIONAL PROTEIN: BIOTIN OPERON REPRESSOR AND BIOTIN-[ACETYL                 | I.B.15  |
| RSc0313 | RS03280 |      | 0,41  | 0,02  |       |       |       | -0,48 | 0,04 | birA    | ABC TRANSPORTER COG0767, ABC-type transport system involved in resistance to     | IV.D    |
| RSc0314 | RS03281 |      |       |       |       |       |       |       |      |         | ABC TRANSPORTER COG1127, ABC-type transport system involved in resistance to     | IV.D    |
| RSc0315 | RS03282 |      | 0,59  | 0,01  |       |       |       |       |      |         | ABC TRANSPORTER COG1463, ABC-type transport system involved in resistance to     | IV.D    |
| RSc0316 | RS03283 |      |       |       |       |       | -0,65 | 0,04  |      |         | ABC TRANSPORTER COG3218, ABC-type uncharacterized transport system, auxilia      | IV.D    |
| RSc0317 | RS03284 | 0,47 | 0,02  |       | -0,50 | 0,02  |       |       |      |         | TRANSMEMBRANE                                                                    | VI.C    |
| RSc0318 | RS03285 |      |       |       |       |       | -0,75 | 0,03  |      |         | HYPOTHETICAL PROTEIN                                                             | VI.D    |
| RSc0319 | RS03286 |      |       |       |       |       |       |       |      | plcN    | SIGNAL PEPTIDE NON-HEMOLYTIC PHOSPHOLIPASE C (PHOSPHATIDYLCHOLI                  | I.1     |
| RSc0320 | RS03287 |      | 1,15  | 0,02  | -0,60 | 0,00  | -1,80 | 0,00  |      |         | SIGNAL PEPTIDE                                                                   | VI.C    |
| RSc0321 | RS03288 |      | -2,23 | 0,00  | 3,22  | 0,00  | 2,95  | 0,00  |      |         | HYPOTHETICAL PROTEIN                                                             | VI.D    |
| RSc0322 | RS03289 |      |       |       | -0,65 | 0,02  |       |       |      |         | LIPOIC ACID SYNTHETASE (LIP-SYN) (LIPOATE SYNTHASE)                              | I.B.13  |
| RSc0323 | RS03290 |      |       |       | -0,58 | 0,00  |       |       |      |         | LIPOATE-PROTEIN LIGASE B                                                         | I.B.13  |
| RSc0324 | RS03291 |      |       |       | -0,54 | 0,00  |       | 1,12  | 0,00 | lipB    | HYPOTHETICAL PROTEIN                                                             | VI.B    |
| RSc0325 | RS03292 |      |       |       | -0,65 | 0,01  |       |       |      |         | TRANSCRIPTION REGULATOR                                                          | VI.A    |
| RSc0326 | RS03293 |      |       |       | -0,27 | 0,01  |       |       |      |         | CONSERVED HYPOTHETICAL PROTEIN                                                   | VI.C    |
| RSc0327 | RS03294 |      |       |       | -0,52 | 0,01  |       |       |      |         | TRANSMEMBRANE PENICILLIN-BINDING PROTEIN (D-ALANYL-D-ALANINE CARE                | IV.A    |
| RSc0328 | RS03295 |      | 0,46  | 0,02  |       |       |       | -0,49 | 0,05 | dac     | TRANSMEMBRANE COG2945, Hydrolase of the alpha/beta superfamily                   | II      |
| RSc0329 | RS03296 |      | 0,38  | 0,02  | -0,44 | 0,00  |       |       |      |         | FERREDOXIN 2FE-2S                                                                | I.G.1   |
| RSc0330 | RS03297 |      | 0,38  | 0,01  | -1,24 | 0,00  |       |       |      |         | TRANSMEMBRANE C4-DICARBOXYLATE TRANSPORT PROTEIN                                 | IV.D.3  |
| RSc0331 | RS03298 |      |       |       |       |       | -1,69 | 0,02  |      | dctA1   | TRANSCRIPTION REGULATOR C4-DICARBOXYLATE TRANSPORT SENSOR KIN/                   | IV.D.3  |
| RSc0332 | RS03299 |      |       |       |       |       | -0,47 | 0,02  |      | dctB2   | TRANSCRIPTION REGULATOR C4-DICARBOXYLATE TRANSPORT RESPONSE R                    | IV.D.3  |
| RSc0333 | RS03300 |      |       |       | -0,82 | 0,01  |       |       |      |         | TRANSMEMBRANE COG0526, Thiol-disulfide isomerase and thioredoxins                | II.B.7  |
| RSc0334 | RS03301 |      |       |       | -0,66 | 0,00  | -0,60 | 0,04  |      |         | COG2110, Phosphatase homologous to the C-terminal domain of histone macroH2A     | VI.C    |
| RSc0335 | RS03302 |      |       |       | -0,49 | 0,01  |       |       |      |         | TRANSMEMBRANE                                                                    | VI.C    |
| RSc0336 | RS03303 |      |       |       | -0,72 | 0,00  |       |       |      |         | SIGNAL PEPTIDE                                                                   | VI.D    |
| RSc0337 | RS03304 |      |       |       | -0,88 | 0,01  |       |       |      |         | OXIDOREDUCTASE POLYPHENOL OXIDASE B PRECURSOR (CATECHOL OXIDA                    | I.A.4   |
| RSc0338 | RS03305 |      |       |       | -0,54 | 0,03  |       |       |      |         | COG0606, ATPase with chaperone activity                                          | II.B.7  |

|         |          |      |      |       |       |       |       |       |       |                                                                               |         |      |                                                                                  |         |
|---------|----------|------|------|-------|-------|-------|-------|-------|-------|-------------------------------------------------------------------------------|---------|------|----------------------------------------------------------------------------------|---------|
| RSc0339 | RSc03306 |      |      | -0.57 | 0.00  |       |       | 0.74  | 0.00  | TRANSMEMBRANE                                                                 | VI.C    |      |                                                                                  |         |
| RSc0340 | RSc03307 |      |      |       |       | 0.67  | 0.01  | 0.57  | 0.02  | CONSERVED HYPOTHETICAL PROTEIN                                                | VI.C    |      |                                                                                  |         |
| RSc0341 | RSc03308 |      |      | -0.39 | 0.01  | -1.51 | 0.02  |       |       | SIGNAL PEPTIDE                                                                | VI.C    |      |                                                                                  |         |
| RSc0342 | RSc03309 |      |      |       |       |       |       |       |       | glrK TRANSCRIPTION REGULATOR NITROGEN REGULATORY PROTEIN P-II                 | IA.18   |      |                                                                                  |         |
| RSc0343 | RSc03310 |      |      | -0.45 | 0.01  |       |       |       |       | amtB TRANSMEMBRANE AMMONIUM TRANSPORTER                                       | IF.18   |      |                                                                                  |         |
| RSc0344 | RSc03311 |      |      |       |       |       |       |       |       | CONSERVED HYPOTHETICAL PROTEIN                                                | VI.C    |      |                                                                                  |         |
| RSc0345 | RSc03312 |      |      |       |       |       |       | -1.85 | 0.04  | gshB GLUTATHIONE SYNTHETASE                                                   | IB.6    |      |                                                                                  |         |
| RSc0346 | RSc03313 |      |      | -0.53 | 0.04  |       |       |       |       | COG2893, Phosphotransferase system, mannose/fructose-specific component IIA   | IV.D.3  |      |                                                                                  |         |
| RSc0347 | RSc03314 |      |      |       |       |       |       |       |       | pstH PHOSPHOCARRIER PROTEIN HPR (phosphohistidinoprotein-hexose phosphotransf | IV.D.3  |      |                                                                                  |         |
| RSc0348 | RSc03315 | 0.68 | 0.02 |       | 0.55  | 0.03  |       |       |       | pslI TRANSMEMBRANE PHOSPHOENOLPYRUVATE-PROTEIN PHOSPHOTRANSFER                | IV.D.3  |      |                                                                                  |         |
| RSc0349 | RSc03316 |      |      | -1.63 | 0.00  | -1.44 | 0.00  | -0.80 | 0.02  | bfd BACTERIOFERRITIN-ASSOCIATED FERREDOXIN                                    | IV.F.1  |      |                                                                                  |         |
| RSc0350 | RSc03317 |      |      | -0.24 | 0.02  | -0.78 | 0.00  | -0.78 | 0.00  | bfr BACTERIOFERRITIN BFR (CYTOCHROME B-1) (CYTOCHROME B-557)                  | IV.F.1  |      |                                                                                  |         |
| RSc0351 | RSc03318 |      |      |       | 0.64  | 0.01  |       |       |       | thiF TRANSMEMBRANE THIIF PROTEIN                                              | IB.8    |      |                                                                                  |         |
| RSc0352 | RSc03319 |      |      |       | 0.34  | 0.02  |       |       |       | TRANSMEMBRANE COG0793, Periplasmic protease                                   | IA.4    |      |                                                                                  |         |
| RSc0353 | RSc03320 |      |      |       | -0.46 | 0.00  |       | 0.81  | 0.00  | gpmA PHOSPHOGLYCERATE MUTASE 1 (PHOSPHOGLYCEROMUTASE 1)                       | I.H.8   |      |                                                                                  |         |
| RSc0354 | RSc03321 |      |      |       |       |       |       |       |       | TRANSMEMBRANE COG0607, Rhodanese-related sulfurtransferase                    | I       |      |                                                                                  |         |
| RSc0355 | RSc03322 |      |      |       |       |       |       |       |       | grxC GLUTAREDOXIN 3 (GRX3)                                                    | IB.6    |      |                                                                                  |         |
| RSc0356 | RSc03323 |      |      |       | 0.50  | 0.03  |       |       |       | secB PROTEIN-EXPORT PROTEIN SECB                                              | IV.E.2  |      |                                                                                  |         |
| RSc0357 | RSc03324 |      |      |       | 1.07  | 0.00  |       |       |       | OXIDOREDUCTASE GLYCEROL-3-PHOSPHATE DEHYDROGENASE (NAD(P)+)                   | I.H.3   |      |                                                                                  |         |
| RSc0358 | RSc03326 |      |      |       |       |       |       |       |       | yibK TRNA/RRNA METHYLTRANSFERASE                                              | IB.6    |      |                                                                                  |         |
| RSc0359 | RSc03327 |      |      |       |       |       |       |       |       | COMPETENCE PROTEIN F-RELATED PROTEIN                                          | IV.E    |      |                                                                                  |         |
| RSc0360 | RSc03328 |      |      |       | 0.89  | 0.04  |       |       |       | bioC BIOTIN SYNTHESIS PROTEIN (METHYLTRANSFERASE)                             | IB.15   |      |                                                                                  |         |
| RSc0361 | RSc03329 | 0.39 | 0.04 |       | 0.39  | 0.02  |       | 0.87  | 0.00  | TRANSMEMBRANE                                                                 | VI.C    |      |                                                                                  |         |
| RSc0362 | RSc03330 |      |      |       | 0.74  | 0.00  |       | 0.82  | 0.01  | COX236, Predicted Zn-dependent peptidases                                     | II.3    |      |                                                                                  |         |
| RSc0363 | RSc03331 |      |      |       | 0.67  | 0.05  |       | 1.23  | 0.00  | COX0612, Predicted Zn-dependent peptidases                                    | II.3    |      |                                                                                  |         |
| RSc0364 | RSc03332 |      |      |       |       |       |       | 1.11  | 0.00  | COG0742, N6-adenine-specific methylase                                        | II.B.8  |      |                                                                                  |         |
| RSc0365 | RSc03333 |      |      |       | 0.81  | 0.00  |       | 0.75  | 0.02  | PHOSPHOPANTETHEINE ADENYLYLTRANSFERASE (PANTETHEINE- PHOSPH                   | III.A.1 |      |                                                                                  |         |
| RSc0366 | RSc03334 |      |      |       | 0.34  | 0.00  | -0.30 | 0.03  |       | FERREDOXIN                                                                    | I.G.1   |      |                                                                                  |         |
| RSc0367 | RSc03335 |      |      |       | 0.57  | 0.00  |       |       |       | SIGNAL PEPTIDE                                                                | VI.C    |      |                                                                                  |         |
| RSc0368 | RSc03336 |      |      |       |       |       |       |       |       | COG1660, Predicted P-loop-containing kinase                                   | VI.C    |      |                                                                                  |         |
| RSc0369 | RSc03337 |      |      |       |       |       |       |       |       | SIGNAL PEPTIDE                                                                | VI.C    |      |                                                                                  |         |
| RSc0370 | RSc03338 |      |      |       | 0.72  | 0.04  |       |       |       | PTS2, Predicted Zn-dependent peptidases                                       | II.3    |      |                                                                                  |         |
| RSc0371 | RSc03339 |      |      |       | 1.08  | 0.05  | -0.52 | 0.02  |       | COG0612, Predicted Zn-dependent peptidases                                    | II.3    |      |                                                                                  |         |
| RSc0372 | RSc03340 |      |      |       | 0.91  | 0.00  | -0.31 | 0.00  |       | COG0742, N6-adenine-specific methylase                                        | II.B.8  |      |                                                                                  |         |
| RSc0373 | RSc03341 |      |      |       | 0.44  | 0.00  | -0.67 | 0.00  | 0.72  | 0.03                                                                          | 1.22    | 0.00 | LIPOPROTEIN                                                                      | VI.C    |
| RSc0374 | RSc03342 |      |      |       |       |       | -0.49 | 0.00  |       |                                                                               |         |      | rpoH TRANSCRIPTION REGULATOR RNA POLYMERASE SIGMA H (SIGMA-32) FACTO             | I.E.1   |
| RSc0375 | RSc03343 |      |      |       |       |       | -0.76 | 0.05  |       |                                                                               |         |      | TRANSMEMBRANE SIGNAL TRANSDUCTION PROTEIN GGDEF DOMAIN                           | VI.A    |
| RSc0376 | RSc03344 |      |      |       |       |       |       |       |       |                                                                               |         |      | COG1765, Redox protein, regulator of disulfide bond formation                    | II.B.7  |
| RSc0377 | RSc03345 |      |      |       |       |       |       |       |       |                                                                               |         |      | PIRIN-RELATED PROTEIN                                                            | VI.C    |
| RSc0378 | RSc03346 |      |      |       | 0.35  | 0.01  |       |       |       |                                                                               |         |      | trpD3 ANTHRANILATE PHOSPHORIBOSYLTRANSFERASE                                     | IA.6    |
| RSc0379 | RSc03347 |      |      |       | 0.33  | 0.05  | -0.35 | 0.02  |       |                                                                               |         |      | nasD ABC TRANSPORTER NITRATE ATP-BINDING PROTEIN                                 | IV.D.1  |
| RSc0380 | RSc03348 |      |      |       |       |       |       |       |       |                                                                               |         |      | nasE ABC TRANSPORTER NITRATE TRANSMEMBRANE PROTEIN                               | IV.D.1  |
| RSc0381 | RSc03349 |      |      |       |       |       |       |       |       |                                                                               |         |      | nasF NITRATE TRANSPORTER                                                         | IV.D.1  |
| RSc0382 | RSc03350 |      |      |       |       |       |       |       |       |                                                                               |         |      | TRANSCRIPTION REGULATOR RESPONSE REGULATOR                                       | VI.A    |
| RSc0383 | RSc03351 |      |      |       |       |       |       |       |       |                                                                               |         |      | OXIDOREDUCTASE COG0179, 2-keto-4-pentenolate hydratase / 2-oxohepta-3-ene-1      | I       |
| RSc0384 | RSc03352 |      |      |       |       |       |       |       |       |                                                                               |         |      | mhpD OXIDOREDUCTASE COG0179, 2-keto-4-pentenolate hydratase / 2-oxohepta-3-ene-1 | I       |
| RSc0385 | RSc03353 |      |      |       |       |       |       |       |       |                                                                               |         |      | gslB GLUTATHIONE S-TRANSFERASE                                                   | II.B.7  |
| RSc0386 | RSc03354 |      |      |       | 0.44  | 0.01  |       |       |       |                                                                               |         |      | ftsY TRANSMEMBRANE COG1279, LysE-type efflux permease                            | IV.D    |
| RSc0387 | RSc03355 |      |      |       | 0.66  | 0.03  |       |       |       |                                                                               |         |      | CELL DIVISION PROTEIN                                                            | IV.A    |
| RSc0388 | RSc03356 |      |      |       |       |       | -0.61 | 0.00  | 0.73  | 0.05                                                                          |         |      | SIGNAL PEPTIDE                                                                   | VI.C    |
| RSc0389 | RSc03357 |      |      |       |       |       | -0.43 | 0.00  |       |                                                                               |         |      | COG0612, Predicted Zn-dependent peptidases                                       | II.3    |
| RSc0390 | RSc03358 |      |      |       | 1.02  | 0.01  | -0.51 | 0.01  |       |                                                                               |         |      | SIGNAL PEPTIDE                                                                   | VI.C    |
| RSc0391 | RSc03359 |      |      |       |       |       | -0.51 | 0.00  |       |                                                                               |         |      | COG0742, N6-adenine-specific methylase                                           | II.B.8  |
| RSc0392 | RSc03360 |      |      |       |       |       | -1.05 | 0.00  | -0.80 | 0.00                                                                          |         |      | kdtB PHOSPHOPANTETHEINE ADENYLYLTRANSFERASE (PANTETHEINE- PHOSPHA                | III.A.1 |
| RSc0393 | RSc03361 |      |      |       |       |       | -0.76 | 0.00  | -2.25 | 0.00                                                                          |         |      | FERREDOXIN                                                                       | I.G.1   |
| RSc0394 | RSc03362 |      |      |       |       |       |       |       |       |                                                                               |         |      | SIGNAL PEPTIDE                                                                   | VI.C    |
| RSc0395 | RSc03363 |      |      |       |       |       |       |       |       |                                                                               |         |      | pth PEPTIDYL-TRNA HYDROLASE                                                      | II.D.1  |
| RSc0396 | RSc03364 |      |      |       | 0.88  | 0.02  |       |       | -0.77 | 0.05                                                                          |         |      | rplY 50S RIBOSOMAL SUBUNIT PROTEIN L25                                           | III.C.2 |
| RSc0397 | RSc03365 |      |      |       |       |       | -0.36 | 0.00  |       |                                                                               |         |      | prsA RIBOSE-PHOSPHATE PYROPHOSPHOKINASE                                          | ID.2    |
| RSc0398 | RSc03366 |      |      |       |       |       |       |       |       |                                                                               |         |      | ipk ISOPENYLYL MONOPHOSPHATE KINASE (4-CYTIDINE-5'-DIPHOSPHO-2-C-ME              | IF      |
| RSc0399 | RSc03367 |      |      |       |       |       | -0.56 | 0.01  | 1.26  | 0.01                                                                          |         |      | lolB COG3017, Outer membrane lipoprotein involved in outer membrane biogenesis   | III.B.2 |
| RSc0400 | RSc03368 |      |      |       | 0.37  | 0.01  | -0.49 | 0.00  |       |                                                                               |         |      | mutM TRANSMEMBRANE                                                               | VI.C    |
| RSc0401 | RSc03369 |      |      |       |       |       | -0.40 | 0.00  | -0.42 | 0.05                                                                          |         |      | FORMAMIDOPYRIMIDINE-DNA GLYCOSYLASE                                              | II.B.8  |
| RSc0402 | RSc03370 |      |      |       |       |       |       |       |       |                                                                               |         |      | COG0699, Predicted GTPase (dynammin-related)                                     | VI.C    |
| RSc0403 | RSc03371 |      |      |       |       |       |       |       |       |                                                                               |         |      | mutY AVG-SPECIFIC ADENINE GLYCOSYLASE                                            | II.B.8  |
| RSc0404 | RSc03372 |      |      |       |       |       |       |       |       |                                                                               |         |      | CONSERVED HYPOTHETICAL PROTEIN                                                   | VI.C    |
| RSc0405 | RSc03373 |      |      |       |       |       |       |       |       |                                                                               |         |      | COG1660, Predicted P-loop-containing kinase                                      | VI.C    |
| RSc0406 | RSc03374 |      |      |       |       |       |       |       |       |                                                                               |         |      | SIGNAL PEPTIDE                                                                   | VI.C    |
| RSc0407 | RSc03375 |      |      |       |       |       |       |       |       |                                                                               |         |      | ptsK HPR KINASE AND PHOSPHATASE                                                  | IF      |
| RSc0408 | RSc03376 |      |      |       |       |       |       |       |       |                                                                               |         |      | TRANSCRIPTION REGULATOR NITROGEN REGULATORY IIA PROTEIN (ENZYME                  | I.E.1   |
| RSc0409 | RSc03377 |      |      |       |       |       |       |       |       |                                                                               |         |      | ptsN SIGMA-54 MODULATION PROTEIN                                                 | I.E.1   |
| RSc0410 | RSc03378 |      |      |       | 0.69  | 0.01  |       |       |       |                                                                               |         |      | rpoN1 TRANSCRIPTION REGULATOR RNA POLYMERASE SIGMA N (SIGMA 54) FACTO            | I.E.1   |
| RSc0411 | RSc03379 |      |      |       |       |       |       |       |       |                                                                               |         |      | ABC TRANSPORTER ATP-BINDING PROTEIN                                              | IV.D    |
| RSc0412 | RSc03380 |      |      |       |       |       |       |       |       |                                                                               |         |      | SIGNAL PEPTIDE                                                                   | VI.C    |
| RSc0413 | RSc03381 |      |      |       |       |       |       |       |       |                                                                               |         |      | TRANSMEMBRANE                                                                    | VI.C    |
| RSc0414 | RSc03382 |      |      |       |       |       |       |       |       |                                                                               |         |      | yrbI 3-DEOXY-D-MANNO-OCTULOSONATE 8-PHOSPHATE (KDO 8-P)PHOSPHATASE               | II.B.2  |
| RSc0415 | RSc03383 |      |      |       |       |       |       |       |       |                                                                               |         |      | COG0794, Predicted sugar phosphate isomerase involved in capsule formation       | III.B   |
| RSc0416 | RSc03384 |      |      |       |       |       |       |       |       |                                                                               |         |      | TRANSMEMBRANE GLUTATHIONE-REGULATED POTASSIUM-EFFLUX SYSTEM                      | IV.D.4  |
| RSc0417 | RSc03385 |      |      |       |       |       |       |       |       |                                                                               |         |      | CONSERVED HYPOTHETICAL PROTEIN                                                   | VI.C    |
| RSc0418 | RSc03386 |      |      |       |       |       |       |       |       |                                                                               |         |      | COG0693, Intracellular protease/amidase                                          | II      |
| RSc0419 | RSc03387 |      |      |       |       |       |       |       |       |                                                                               |         |      | apt ADENINE PHOSPHORIBOSYLTRANSFERASE (APRT)                                     | IF.1    |
| RSc0420 | RSc03388 |      |      |       |       |       |       |       |       |                                                                               |         |      | TRANSMEMBRANE TRANSPORT PROTEIN                                                  | IV.D    |
| RSc0421 | RSc03389 |      |      |       |       |       |       |       |       |                                                                               |         |      | TRANSMEMBRANE                                                                    | VI.C    |
| RSc0422 | RSc03390 |      |      |       |       |       |       |       |       |                                                                               |         |      | uvrA1 ABC TRANSPORTER EXCINUCLEASE ABC SUBUNIT A (DNA REPAIR ATP-BINDI           | II.B.8  |
| RSc0423 | RSc03392 |      |      |       |       |       |       |       |       |                                                                               |         |      | TRANSMEMBRANE MULTIDRUG-EFFLUX TRANSPORTER                                       | IV.D    |
| RSc0424 | RSc03393 |      |      |       |       |       |       |       |       |                                                                               |         |      | ssb SINGLE-STRAND BINDING PROTEIN (HELIX-DESTABILIZING PROTEIN)                  | II.B.8  |
| RSc0425 | RSc03394 |      |      |       |       |       |       |       |       |                                                                               |         |      | REMNANT OF A TRANSPOSASE                                                         | VI.A    |
| RSc0426 | RSc03395 |      |      |       |       |       |       |       |       |                                                                               |         |      | SIGNAL PEPTIDE                                                                   | VI.C    |
| RSc0427 | RSc03396 |      |      |       |       |       |       |       |       |                                                                               |         |      | COG4706, 3-hydroxylacyl-(acyl carrier protein) dehydratase                       | I       |
| RSc0428 | RSc03397 |      |      |       |       |       |       |       |       |                                                                               |         |      | CONSERVED HYPOTHETICAL PROTEIN                                                   | VI.C    |
| RSc0429 | RSc03398 |      |      |       |       |       |       |       |       |                                                                               |         |      | 3-OXOACYL-[ACYL-CARRIER-PROTEIN] SYNTHASE (BETA- KETOACYL-ACP SYII               | IB.1    |
| RSc0430 | RSc03399 |      |      |       |       |       |       |       |       |                                                                               |         |      | TRANSMEMBRANE Polysaccharide deacetylase                                         | II.4    |
| RSc0431 | RSc0400  |      |      |       |       |       |       |       |       |                                                                               |         |      | TRANSMEMBRANE COG4258, Predicted exporter                                        | VI.C    |
| RSc0432 | RSc0401  |      |      |       |       |       |       |       |       |                                                                               |         |      | SIGNAL PEPTIDE                                                                   | VI.B    |
| RSc0433 | RSc0402  |      |      |       |       |       |       |       |       |                                                                               |         |      | COG4261 - Predicted acyltransferase                                              | I       |
| RSc0434 | RSc0403  |      |      |       |       |       |       |       |       |                                                                               |         |      | COG0365, Acyl-coenzyme A synthetases/AMP-(fatty) acid ligases                    | I       |
| RSc0435 | RSc0404  |      |      |       |       |       |       |       |       |                                                                               |         |      | TRANSMEMBRANE                                                                    | VI.C    |
| RSc0436 | RSc0405  |      |      |       |       |       |       |       |       |                                                                               |         |      | COG0236, Acyl carrier protein                                                    | I       |
| RSc0437 | RSc0406  |      |      |       |       |       |       |       |       |                                                                               |         |      | OXIDOREDUCTASE 3-OXOACYL-[ACYL-CARRIER-PROTEIN] REDUCTASE                        | IB.1    |
| RSc0438 | RSc0407  |      |      |       |       |       |       |       |       |                                                                               |         |      | COG0463, Glycosyltransferase                                                     | I       |
| RSc0439 | RSc0408  |      |      |       |       |       |       |       |       |                                                                               |         |      | SIGNAL PEPTIDE                                                                   | VI.C    |
| RSc0440 | RSc0409  |      |      |       |       |       |       |       |       |                                                                               |         |      | SIGNAL PEPTIDE                                                                   | VI.C    |
| RSc0441 | RSc0410  |      |      |       |       |       |       |       |       |                                                                               |         |      | LIPASE/ESTERASE                                                                  | II.1    |
| RSc0442 | RSc0411  |      |      |       |       |       |       |       |       |                                                                               |         |      | SIGNAL PEPTIDE                                                                   | VI.B    |
| RSc0443 | RSc0412  |      |      |       |       |       |       |       |       |                                                                               |         |      | gntK THERMORESISTANT GLUCONOKINASE (GLUCONATE KINASE 2)                          | IF.4    |
| RSc0444 | RSc0413  |      |      |       |       |       |       |       |       |                                                                               |         |      | TRANSMEMBRANE FATTY-ACID-COA LIGASE                                              | II.1    |
| RSc0445 | RSc0414  |      |      |       |       |       |       |       |       |                                                                               |         |      | SIGNAL PEPTIDE GLYCIN-RICH PROTEIN                                               | VI.C    |
| RSc0446 | RSc0415  |      |      |       |       |       |       |       |       |                                                                               |         |      | SIGNAL PEPTIDE                                                                   | VI.C    |
| RSc0447 | RSc0416  |      |      |       |       |       |       |       |       |                                                                               |         |      | SIGNAL PEPTIDE COG3271, Predicted double-glycine peptidase                       | II.3    |
| RSc0448 | RSc0417  |      |      |       |       |       |       |       |       |                                                                               |         |      | LIPOPROTEIN                                                                      | VI.B    |
| RSc0449 | RSc0418  |      |      |       |       |       |       |       |       |                                                                               |         |      | CONSERVED HYPOTHETICAL PROTEIN                                                   | VI.C    |
| RSc0450 | RSc0419  |      |      |       |       |       |       |       |       |                                                                               |         |      | CONSERVED HYPOTHETICAL PROTEIN                                                   | VI.C    |
| RSc0451 | RSc0420  |      |      |       |       |       |       |       |       |                                                                               |         |      | TRANSMEMBRANE THREONINE AMONIA-LYASE (THREONINE DEHYDRATASE, I                   | IA.2    |
| RSc0452 | RSc0421  |      |      |       |       |       |       |       |       |                                                                               |         |      | TRANSMEMBRANE ATP-SENSITIVE INWARD RECTIFIER POTASSIUM CHANNEL IV                | IV.D    |



|         |         |  |      |       |       |       |       |       |                                                                                   |                                                                                    |                                                                          |          |
|---------|---------|--|------|-------|-------|-------|-------|-------|-----------------------------------------------------------------------------------|------------------------------------------------------------------------------------|--------------------------------------------------------------------------|----------|
| RSc0451 | RS04451 |  |      | -0.91 | 0.00  | -1.33 | 0.00  |       | TRANSMEMBRANE                                                                     | V.I.D                                                                              |                                                                          |          |
| RSc0452 | RS04450 |  |      | 1.85  | 0.00  |       |       |       | TRANSMEMBRANE                                                                     | V.I.C                                                                              |                                                                          |          |
| RSc0453 | RS04448 |  |      | -0.54 | 0.04  |       |       |       | TRANSMEMBRANE                                                                     | V.I.C                                                                              |                                                                          |          |
| RSc0454 | RS04446 |  |      |       |       |       |       |       | OXIDOREDUCTASE COG0247, Fe-S OXIDOREDUCTASE AND COG0277, FAD/FM1                  |                                                                                    |                                                                          |          |
| RSc0455 | RS04445 |  |      |       |       |       |       |       | COG0537, Diadenosine tetraphosphate (Ap4A) hydrolase and other HIT family hydroly |                                                                                    |                                                                          |          |
| RSc0456 | RS04444 |  |      |       |       |       |       |       | ABC TRANSPORTER ATP-BINDING TRANSPORT PROTEIN                                     | I.V.D                                                                              |                                                                          |          |
| RSc0457 | RS04443 |  |      | -0.44 | 0.01  | 0.60  | 0.00  |       | CONSERVED HYPOTHETICAL PROTEIN                                                    | V.I.C                                                                              |                                                                          |          |
| RSc0458 | RS04441 |  |      |       |       | -0.68 | 0.00  | -0.27 | 0.04                                                                              | ubiE                                                                               | I.B.5                                                                    |          |
| RSc0459 | RS04440 |  |      | -0.70 | 0.00  | -0.54 | 0.04  |       | TRANSMEMBRANE                                                                     | V.I.C                                                                              |                                                                          |          |
| RSc0460 | RS04439 |  |      | -0.45 | 0.01  |       |       | -1.61 | 0.01                                                                              | CONSERVED HYPOTHETICAL PROTEIN                                                     | V.I.C                                                                    |          |
| RSc0461 | RS04437 |  |      | -0.72 | 0.03  |       |       |       | TRANSMEMBRANE UBIQUINONE BIOSYNTHESIS PROTEIN                                     | I.B.5                                                                              |                                                                          |          |
| RSc0462 | RS04436 |  | 0.71 | 0.04  |       |       |       |       | CONSERVED HYPOTHETICAL PROTEIN                                                    | V.I.C                                                                              |                                                                          |          |
| RSc0463 | RS04434 |  | 0.85 | 0.01  | -0.49 | 0.00  |       |       | TRANSMEMBRANE SODIUM/SOLUTE SYMPORTER                                             | I.V.D                                                                              |                                                                          |          |
| RSc0464 | RS04433 |  | 0.49 | 0.01  | -0.34 | 0.00  |       | -0.36 | 0.04                                                                              | CONSERVED HYPOTHETICAL PROTEIN                                                     | V.I.C                                                                    |          |
| RSc0465 | RS04432 |  |      |       | -0.51 | 0.01  | -0.64 | 0.03  | -0.45                                                                             | 0.04                                                                               | TRANSMEMBRANE                                                            | V.I.C    |
| RSc0466 | RS04431 |  | 0.90 | 0.00  | -0.35 | 0.01  |       |       |                                                                                   | aspS                                                                               | I.I.D.1                                                                  |          |
| RSc0467 | RS04430 |  |      |       | -0.57 | 0.02  |       |       |                                                                                   | TRANSMEMBRANE                                                                      | V.I.C                                                                    |          |
| RSc0468 | RS04429 |  |      |       | -0.46 | 0.00  |       |       |                                                                                   | ntpA                                                                               | I.F.9                                                                    |          |
| RSc0469 | RS04427 |  |      |       | -0.53 | 0.00  |       | -0.73 | 0.01                                                                              | COG3568, Metal-dependent hydrolase                                                 | I.I                                                                      |          |
| RSc0470 | RS04425 |  |      |       |       |       |       |       |                                                                                   | COG1502, Phosphatidylserine/phosphatidylglycerophosphate/cardioliipin synthases ar | I                                                                        |          |
| RSc0471 | RS04424 |  | 0.73 | 0.02  | -0.49 | 0.03  |       |       |                                                                                   | COG4670, Acyl CoA:acetate/3-ketoacid CoA transferase                               | I                                                                        |          |
| RSc0472 | RS04423 |  | 0.99 | 0.00  | -1.42 | 0.00  |       |       |                                                                                   | TRANSCRIPTION REGULATOR                                                            | V.I.A                                                                    |          |
| RSc0473 | RS04422 |  | 0.77 | 0.01  | -0.72 | 0.00  | -0.89 | 0.00  |                                                                                   | OXIDOREDUCTASE ACYL-CoA DEHYDROGENASE                                              | I.I.1                                                                    |          |
| RSc0474 | RS04421 |  | 0.90 | 0.01  | -0.48 | 0.01  |       |       |                                                                                   | OXIDOREDUCTASE 3-HYDROXYACYL-CoA DEHYDROGENASE                                     | I.I.1                                                                    |          |
| RSc0475 | RS04420 |  | 0.80 | 0.01  | -0.56 | 0.00  |       |       |                                                                                   | ACETYL-CoA ACYLTRANSFERASE                                                         | I.C                                                                      |          |
| RSc0476 | RS04419 |  |      |       |       |       |       |       |                                                                                   | ENOYL-CoA HYDRATASE                                                                | I.I.4                                                                    |          |
| RSc0477 | RS04418 |  |      |       | -0.79 | 0.00  |       |       |                                                                                   | COG1607, Acyl-CoA hydrolase                                                        | I.I                                                                      |          |
| RSc0478 | RS04417 |  |      |       | -0.66 | 0.01  |       |       |                                                                                   | ABC TRANSPORTER COMPOSITE ATP-BINDING TRANSMEMBRANE PROTEIN                        | I.V.D                                                                    |          |
| RSc0479 | RS04416 |  |      |       | -0.47 | 0.01  |       |       |                                                                                   | TRANSCRIPTION REGULATOR                                                            | V.I.A                                                                    |          |
| RSc0480 | RS04415 |  | 0.49 | 0.01  | -0.36 | 0.04  |       |       |                                                                                   | gdhA                                                                               | I.A.19                                                                   |          |
| RSc0481 | RS04394 |  | 0.36 | 0.05  | -0.54 | 0.00  | 0.82  | 0.00  |                                                                                   | ABC TRANSPORTER AMINO-ACID-BINDING PERIPLASMIC PROTEIN (PBP)                       | I.V.D                                                                    |          |
| RSc0482 | RS04391 |  | 0.72 | 0.00  | -0.36 | 0.00  | 0.95  | 0.03  |                                                                                   | ABC TRANSPORTER GLUTAMATE/ASPARTATE TRANSMEMBRANE PROTEIN                          | I.V.D.2                                                                  |          |
| RSc0483 | RS04390 |  | 0.88 | 0.00  | -0.27 | 0.02  |       |       | -1.31                                                                             | 0.01                                                                               | ABC TRANSPORTER GLUTAMATE/ASPARTATE TRANSMEMBRANE PROTEIN                | I.V.D.2  |
| RSc0484 | RS04389 |  |      |       | -0.41 | 0.00  |       |       | -0.88                                                                             | 0.00                                                                               | ABC TRANSPORTER GLUTAMATE/ASPARTATE TRANSPORT ATP-BINDING PRO            | I.V.D.2  |
| RSc0485 | RS04388 |  |      |       | -0.79 | 0.00  | -0.89 | 0.00  |                                                                                   | COG0121, Predicted glutamine amidotransferase                                      | I                                                                        |          |
| RSc0486 | RS05749 |  |      |       | -0.30 | 0.01  |       |       |                                                                                   | ttuD2                                                                              | I.I.4                                                                    |          |
| RSc0487 | RS05822 |  | 1.20 | 0.01  |       |       |       |       |                                                                                   | DIHYDROOROTASE                                                                     | I.D.1                                                                    |          |
| RSc0488 | RS05751 |  |      |       |       |       |       |       |                                                                                   | CONSERVED HYPOTHETICAL PROTEIN                                                     | V.I.C                                                                    |          |
| RSc0489 | RS05752 |  | 0.59 | 0.03  | -0.63 | 0.00  | -0.64 | 0.00  |                                                                                   | COG1765, Predicted redox protein, regulator of disulfide bond formation            | I.I.B.7                                                                  |          |
| RSc0490 | RS05035 |  |      |       |       |       |       |       | -1.05                                                                             | 0.01                                                                               | 50S RIBOSOMAL PROTEIN L13                                                | I.II.C.2 |
| RSc0491 | RS05034 |  | 0.88 | 0.03  |       |       |       |       | -0.98                                                                             | 0.04                                                                               | 30S RIBOSOMAL PROTEIN S9                                                 | I.II.C.2 |
| RSc0492 | RS05033 |  |      |       | -0.49 | 0.00  |       |       | -0.94                                                                             | 0.00                                                                               | TRANSMEMBRANE                                                            | V.I.C    |
| RSc0493 | RS05032 |  |      |       | -0.42 | 0.01  |       |       |                                                                                   | ccmA                                                                               | I.II.B                                                                   |          |
| RSc0494 | RS05030 |  |      |       | -0.22 | 0.01  |       |       | -0.97                                                                             | 0.00                                                                               | CONSERVED HYPOTHETICAL PROTEIN                                           | V.I.C    |
| RSc0495 | RS05029 |  |      |       | -0.63 | 0.00  |       |       |                                                                                   | COG2377, Predicted molecular chaperone distantly related to HSP70-fold metallopro  | I.I.B.7                                                                  |          |
| RSc0496 | RS05028 |  | 0.82 | 0.05  | -0.17 | 0.05  | 1.21  | 0.01  |                                                                                   | tyrS                                                                               | I.I.D.1                                                                  |          |
| RSc0497 | RS05026 |  | 0.52 | 0.04  |       |       | 0.89  | 0.01  |                                                                                   | COG1490, D-Tyr-IRNAtyr deacylase                                                   | I.I.D.1                                                                  |          |
| RSc0498 | RS05025 |  |      |       |       |       |       |       |                                                                                   | HYPOTHETICAL PROTEIN                                                               | V.I.D                                                                    |          |
| RSc0499 | RS05023 |  |      |       |       |       |       |       | -0.97                                                                             | 0.02                                                                               | gpmB                                                                     | I.I.H.8  |
| RSc0500 | RS05022 |  | 0.75 | 0.05  |       |       | 0.88  | 0.02  |                                                                                   | PHOSPHOGLYCERATE MUTASE 2                                                          | I.I.H.8                                                                  |          |
| RSc0501 | RS05021 |  |      |       |       |       |       |       |                                                                                   | rolB                                                                               | I.I.H.8                                                                  |          |
| RSc0502 | RS05020 |  |      |       | -0.73 | 0.00  |       |       |                                                                                   | HOLLIDAY JUNCTION DNA HELICASE                                                     | I.I.H.8                                                                  |          |
| RSc0503 | RS05019 |  |      |       | -0.44 | 0.01  |       |       |                                                                                   | glpQ                                                                               | I.I.F.11                                                                 |          |
| RSc0504 | RS05018 |  |      |       |       |       |       |       | -1.20                                                                             | 0.00                                                                               | GLYCEROPHOSPHORYL DIESTER PHOSPHODIESTERASE, PERIPLASMIC PROTEIN         | I.I.H.8  |
| RSc0505 | RS05017 |  |      |       |       |       |       |       |                                                                                   | purH                                                                               | I.I.D.2                                                                  |          |
| RSc0506 | RS05006 |  |      |       | -0.52 | 0.00  |       |       |                                                                                   | TRANSMEMBRANE BIFUNCTIONAL PROTEIN : PHOSPHORIBOSYLAMINOIMIDAZI                    | I.I.C                                                                    |          |
| RSc0507 | RS05000 |  |      |       |       |       |       |       |                                                                                   | TRANSCRIPTION REGULATOR FACTOR-FOR-INVERSION-STIMULATION PROTEI                    | I.I.C                                                                    |          |
| RSc0508 | RS04999 |  |      |       |       |       |       |       | -0.39                                                                             | 0.01                                                                               | COG0042, tRNA-dihydrouridine synthase                                    | I.I.D.1  |
| RSc0509 | RS04998 |  |      |       |       |       |       |       |                                                                                   | TRANSMEMBRANE AMINO ACID DEHYDROGENASE                                             | I.I.3                                                                    |          |
| RSc0510 | RS04997 |  |      |       |       |       |       |       | 0.68                                                                              | 0.00                                                                               | OXIDOREDUCTASE 2-OCTAPRENYL-6-METHOXYPHENOL HYDROXYLASE                  | I.I.H.3  |
| RSc0511 | RS04996 |  | 0.51 | 0.02  |       |       |       |       |                                                                                   | pepP                                                                               | I.I.A.4                                                                  |          |
| RSc0512 | RS04995 |  |      |       | -0.52 | 0.02  | 0.99  | 0.00  |                                                                                   | TRANSMEMBRANE SIGNAL TRANSDUCTION PROTEIN EAL - GGDEF DOMAINS                      | V.I.A                                                                    |          |
| RSc0513 | RS04992 |  |      |       | 1.01  | 0.01  |       |       |                                                                                   | COG1208, Nucleoside-diphosphate-sugar pyrophosphorylase involved in lipopolysacc   | V.I.C                                                                    |          |
| RSc0514 | RS04986 |  | 0.47 | 0.01  |       |       |       |       |                                                                                   | TRANSMEMBRANE                                                                      | V.I.C                                                                    |          |
| RSc0515 | RS04980 |  |      |       | -0.32 | 0.02  |       |       |                                                                                   | TRANSMEMBRANE COG1296, Predicted branched-chain amino acid permease (azal          | I.V.D.2                                                                  |          |
| RSc0516 | RS04977 |  |      |       | -0.35 | 0.02  |       |       | -0.93                                                                             | 0.00                                                                               | COG3178, Predicted phosphotransferase related to Ser/Thr protein kinases | V.I.C    |
| RSc0517 | RS04975 |  |      |       | -0.38 | 0.01  |       |       |                                                                                   | TRANSMEMBRANE ORGANIC SOLVENT TOLERANCE PROTEIN                                    | I.V.F.1                                                                  |          |
| RSc0518 | RS04973 |  |      |       | -0.21 | 0.02  |       |       |                                                                                   | PEPTIDYL-PROLYL CIS-TRANS ISOMERASE (ROTAMASE C)                                   | I.V.B                                                                    |          |
| RSc0519 | RS04969 |  |      |       |       |       |       |       |                                                                                   | pdxA                                                                               | I.B.10                                                                   |          |
| RSc0520 | RS04961 |  | 0.88 | 0.02  |       |       |       |       |                                                                                   | ksgA                                                                               | I.V.G.2                                                                  |          |
| RSc0521 | RS04960 |  |      |       |       |       |       |       |                                                                                   | DIMETHYLADENOSINE TRANSFERASE (16S RRNA DIMETHYLASE)                               | V.I.C                                                                    |          |
| RSc0522 | RS04959 |  |      |       | -0.32 | 0.05  |       |       |                                                                                   | TRANSMEMBRANE                                                                      | I.F.17                                                                   |          |
| RSc0523 | RS04957 |  | 0.72 | 0.00  |       |       |       |       |                                                                                   | gloA                                                                               | I.I                                                                      |          |
| RSc0524 | RS04944 |  | 1.24 | 0.00  |       |       |       |       | -0.74                                                                             | 0.00                                                                               | LACTOYLGLUTATHIONE LYASE (METHYLGLYOXALASE)                              | I.I      |
| RSc0525 | RS04943 |  |      |       | -0.30 | 0.00  |       |       |                                                                                   | COG1451, Predicted metal-dependent hydrolase                                       | I.I                                                                      |          |
| RSc0526 | RS04942 |  |      |       |       |       |       |       |                                                                                   | TRANSMEMBRANE PHOSPHATE ACYLTRANSFERASE                                            | I                                                                        |          |
| RSc0527 | RS04941 |  | 1.13 | 0.00  | -0.73 | 0.00  | -0.88 | 0.03  |                                                                                   | COG0241, Histidinol phosphatase and related phosphatases                           | I                                                                        |          |
| RSc0528 | RS04940 |  | 0.49 | 0.02  | -0.60 | 0.00  |       |       |                                                                                   | glyS                                                                               | I.I.D.1                                                                  |          |
| RSc0529 | RS04939 |  |      |       |       |       |       |       |                                                                                   | GLYCYL-TRNA SYNTHETASE BETA CHAIN                                                  | V.I.C                                                                    |          |
| RSc0530 | RS04938 |  |      |       |       |       |       |       |                                                                                   | SIGNAL PEPTIDE                                                                     | V.I.C                                                                    |          |
| RSc0531 | RS04937 |  |      |       |       |       |       |       | 1.07                                                                              | 0.03                                                                               | GLYCYL-TRNA SYNTHETASE ALPHA CHAIN                                       | I.I.D.1  |
| RSc0532 | RS04936 |  |      |       |       |       |       |       |                                                                                   | Int                                                                                | I.I.D.1                                                                  |          |
| RSc0533 | RS04935 |  |      |       |       |       |       |       |                                                                                   | TRANSMEMBRANE APOLIPOPROTEIN N-ACYLTRANSFERASE                                     | I.V.F.1                                                                  |          |
| RSc0534 | RS04933 |  | 0.46 | 0.03  | -0.71 | 0.01  |       |       |                                                                                   | COG4535, Putative Mg2+ and Co2+ transporter                                        | I.V.D                                                                    |          |
| RSc0535 | RS04931 |  | 0.92 | 0.04  |       |       |       |       |                                                                                   | COG0319, Predicted metal-dependent hydrolase                                       | I.I                                                                      |          |
| RSc0537 | RS04929 |  |      |       | -1.04 | 0.00  |       |       |                                                                                   | phoH                                                                               | I.V.F.1                                                                  |          |
| RSc0538 | RS04928 |  |      |       | -1.23 | 0.01  |       |       |                                                                                   | COG0621, 2-methylthioadenine synthetase                                            | I.I.B.7                                                                  |          |
| RSc0539 | RS04927 |  |      |       | -0.50 | 0.01  | -0.41 | 0.00  | -0.50                                                                             | 0.00                                                                               | SIGNAL PEPTIDE                                                           | V.I.C    |
| RSc0540 | RS04926 |  | 0.90 | 0.03  |       |       |       |       |                                                                                   | OXIDOREDUCTASE COG3380, Predicted NAD/FAD-dependent oxidoreductase                 | I                                                                        |          |
| RSc0541 | RS04925 |  | 1.04 | 0.01  | -1.65 | 0.00  |       |       |                                                                                   | TRANSMEMBRANE LIPOPROTEIN                                                          | V.I.C                                                                    |          |
| RSc0542 | RS04924 |  |      |       |       |       |       |       |                                                                                   | SIGNAL PEPTIDE                                                                     | V.I.B                                                                    |          |
| RSc0543 | RS04923 |  |      |       | -0.67 | 0.00  |       |       |                                                                                   | TRANSMEMBRANE SHORT-CHAIN DEHYDROGENASE                                            | I.I                                                                      |          |
| RSc0544 | RS04922 |  |      |       | -0.35 | 0.00  |       |       |                                                                                   | OXIDOREDUCTASE TRANSMEMBRANE ACYL-CoA DEHYDROGENASE                                | I.I                                                                      |          |
| RSc0545 | RS04921 |  |      |       | -0.67 | 0.04  |       |       |                                                                                   | TRANSCRIPTION REGULATOR                                                            | V.I.A                                                                    |          |
| RSc0546 | RS04920 |  |      |       |       |       |       |       |                                                                                   | CONSERVED HYPOTHETICAL PROTEIN                                                     | V.I.C                                                                    |          |
| RSc0547 | RS04919 |  |      |       |       |       |       |       |                                                                                   | OXIDOREDUCTASE                                                                     | I.I                                                                      |          |
| RSc0548 | RS04918 |  |      |       |       |       |       |       |                                                                                   | TRANSMEMBRANE                                                                      | V.I.C                                                                    |          |
| RSc0549 | RS04917 |  |      |       |       |       |       |       | -0.59                                                                             | 0.05                                                                               | TRANSMEMBRANE SUGAR TRANSPORTER                                          | I.V.D.3  |
| RSc0550 | RS04916 |  | 0.39 | 0.05  | -0.70 | 0.01  |       |       |                                                                                   | TRANSCRIPTION REGULATOR TRANSMEMBRANE SENSOR HISTIDINE KINASE                      | V.I.A                                                                    |          |
| RSc0551 | RS04915 |  |      |       |       |       |       |       | -0.59                                                                             | 0.02                                                                               | TRANSCRIPTION REGULATOR RESPONSE REGULATOR                               | V.I.A    |
| RSc0552 | RS04913 |  |      |       | -0.36 | 0.01  |       |       |                                                                                   | recA                                                                               | I.II.B.8                                                                 |          |
| RSc0553 | RS04912 |  |      |       | -0.47 | 0.02  | -1.23 | 0.02  | -1.74                                                                             | 0.00                                                                               | DNA STRAND EXCHANGE AND RECOMBINATION PROTEIN                            | V.I.A    |
| RSc0554 | RS04911 |  |      |       |       |       |       |       | -1.54                                                                             | 0.00                                                                               | REGULATORY PROTEIN RECX                                                  | V.I.C    |
| RSc0555 | RS04910 |  |      |       |       |       |       |       | -1.68                                                                             | 0.00                                                                               | CONSERVED HYPOTHETICAL PROTEIN                                           | V.I.C    |
| RSc0556 | RS04909 |  | 1.17 | 0.04  |       |       |       |       |                                                                                   | sucC                                                                               | I.II.6                                                                   |          |
| RSc0557 | RS04908 |  |      |       | -0.65 | 0.02  |       |       |                                                                                   | sucD                                                                               | I.II.6                                                                   |          |
| RSc0558 | RS04907 |  | 0.79 | 0.01  | -0.29 | 0.00  |       |       |                                                                                   | TRANSMEMBRANE COG0861, Membrane protein TerC, possibly involved in tellurium       | I.II.B.1                                                                 |          |
| RSc0559 | RS04906 |  | 0.84 | 0.02  | -0.62 | 0.00  |       |       |                                                                                   | SIGNAL PEPTIDE TYPE 4 FIMBRIAL PILIN-LIKE PROTEIN                                  | I.II.A.2                                                                 |          |
| RSc0560 | RS04905 |  |      |       | -0.41 | 0.03  |       |       |                                                                                   | SIGNAL PEPTIDE TYPE 4 FIMBRIAL PILIN                                               | I.II.A.2                                                                 |          |
| RSc0561 | RS04904 |  | 0.98 | 0.01  |       |       |       |       |                                                                                   | TRANSMEMBRANE COG3307, Lipid A core - O-antigen ligase and related enzymes         | I.II.A.1                                                                 |          |
| RSc0562 | RS04903 |  |      |       | -0.56 | 0.00  |       |       |                                                                                   | MOLYBDENUM COFACTOR BIOSYNTHESIS PROTEIN C                                         | I.II.12                                                                  |          |
|         |         |  |      |       |       |       |       |       |                                                                                   | SIGNAL PEPTIDE COG4783, Putative Zn-dependent protease, contains TPR repeats       | I.II.A.4                                                                 |          |
|         |         |  |      |       |       |       |       |       |                                                                                   | CONSERVED HYPOTHETICAL PROTEIN                                                     | V.I.C                                                                    |          |



|         |         |       |       |       |       |      |       |       |       |                                                                                    |                                                                           |                                 |        |
|---------|---------|-------|-------|-------|-------|------|-------|-------|-------|------------------------------------------------------------------------------------|---------------------------------------------------------------------------|---------------------------------|--------|
| RSc0678 | RS01583 |       | 0,77  | 0,00  |       |      |       |       | pyrB  | ASPARTATE CARBAMOYLTRANSFERASE (CATALYTIC CHAIN)                                   | I.D.1                                                                     |                                 |        |
| RSc0679 | RS01584 |       | 0,58  | 0,00  | -0,25 | 0,00 |       | -0,59 | pyrX  | DIHYDROOROTASE-LIKE PROTEIN                                                        | I.D.1                                                                     |                                 |        |
| RSc0680 | RS01585 | -0,31 | 0,04  |       |       |      |       | -0,70 | plsC  | TRANSMEMBRANE 1-ACYL-SN-GLYCEROL-3-PHOSPHATE ACYLTRANSFERASE                       | II.B.1                                                                    |                                 |        |
| RSc0681 | RS01586 |       | 0,48  | 0,01  |       |      |       |       | apaH  | BIS(5'-NUCLEOSYL)-TETRAPHOSPHATASE (SYMMETRICAL)                                   | I.F.1                                                                     |                                 |        |
| RSc0682 | RS01587 |       | 0,58  | 0,00  | -0,26 | 0,00 | 0,77  | 0,00  | rfbB  | DTDP-GLUCOSE 4,6-DEHYDRATASE                                                       | I.F.10                                                                    |                                 |        |
| RSc0683 | RS01588 |       | 0,80  | 0,00  |       |      | 0,45  | 0,02  | rfbD  | OXIDOREDUCTASE DTDP-4-DEHYDRORHAMNOSE REDUCTASE                                    | I.F.10                                                                    |                                 |        |
| RSc0684 | RS01589 |       | 0,50  | 0,04  | -0,36 | 0,01 | 0,61  | 0,03  | rfbA  | GLUCOSE-1-PHOSPHATE THYMIDYLTRANSFERASE                                            | I.F.10                                                                    |                                 |        |
| RSc0685 | RS01590 |       | 1,02  | 0,00  | -0,37 | 0,00 |       |       | rfbC  | DTDP-4-DEHYDRORHAMNOSE 3,5-EPIMERASE                                               | I.F.10                                                                    |                                 |        |
| RSc0686 | RS01591 |       |       |       | -0,52 | 0,00 |       |       |       |                                                                                    | TRANSMEMBRANE LIPOPOLYSACCHARIDE O-SIDE CHAIN BIOSYNTHESIS PRO            | II.B.2                          |        |
| RSc0687 | RS01592 |       | 0,39  | 0,00  | -0,46 | 0,04 |       |       | rfbF  | DTDP-RHAMNOSYL TRANSFERASE RFBF                                                    | II.B.2                                                                    |                                 |        |
| RSc0688 | RS01593 |       | 0,57  | 0,05  |       |      |       |       |       | GLYCOSYL TRANSFERASE                                                               | II.B.2                                                                    |                                 |        |
| RSc0689 | RS01594 |       |       |       | -0,25 | 0,02 |       |       | wecA  | TRANSMEMBRANE UNDECAPRENYL PHOSPHATE N-ACETYLGLUCOSAMINYLTHI                       | II.B.2                                                                    |                                 |        |
| RSc0690 | RS01595 |       | 0,50  | 0,04  | -0,39 | 0,00 |       |       |       | TRANSMEMBRANE                                                                      | V.I.C                                                                     |                                 |        |
| RSc0691 | RS01596 |       | 0,48  | 0,02  | -0,30 | 0,00 |       |       |       | PHOSPHOMANNOMUTASE OR PHOSPHOGLUCOMUTASE                                           | I.F.18                                                                    |                                 |        |
| RSc0692 | RS01597 |       | 0,67  | 0,00  | -0,32 | 0,01 |       |       | rfaC1 | LIPOPOLYSACCHARIDE HEPTOSYLTRANSFERASE                                             | II.B.2                                                                    |                                 |        |
| RSc0693 | RS01598 |       |       |       |       |      | -1,04 | 0,02  | kdtA  | TRANSMEMBRANE 3-DEOXY-D-MANNO-OCTULOSONIC-ACID TRANSFERASE                         | II.B.2                                                                    |                                 |        |
| RSc0694 | RS01599 |       |       |       | -0,70 | 0,01 | -0,98 | 0,05  |       | TRANSMEMBRANE COG3187, Heat shock protein                                          | II.B.7                                                                    |                                 |        |
| RSc0695 | RS01600 |       |       |       |       |      |       | -0,99 |       | ABC TRANSPORTER PORIN (OMP)                                                        | I.V.D                                                                     |                                 |        |
| RSc0696 | RS01601 |       | 0,81  | 0,00  |       |      |       |       |       | COG0607, Rhodanese-related sulfurtransferase                                       | I                                                                         |                                 |        |
| RSc0697 | RS01602 |       | 0,65  | 0,03  |       |      | 0,71  | 0,02  | pcm   | PROTEIN-L-ISOASPARTATE O-METHYLTRANSFERASE                                         | II.B.7                                                                    |                                 |        |
| RSc0698 | RS01603 |       | 0,35  | 0,00  | -0,64 | 0,01 |       | 1,02  |       | TRANSCRIPTION REGULATOR                                                            | V.I.A                                                                     |                                 |        |
| RSc0699 | RS01604 |       |       |       | -0,48 | 0,01 |       |       |       | OXIDOREDUCTASE COG0727: Predicted Fe-S-cluster oxidoreductase                      | I                                                                         |                                 |        |
| RSc0700 | RS01605 |       |       |       | 0,38  | 0,00 |       |       |       | TRANSMEMBRANE                                                                      | V.I.C                                                                     |                                 |        |
| RSc0701 | RS01606 |       |       |       | -0,33 | 0,02 |       |       | bacA  | TRANSMEMBRANE BACITRACIN RESISTANCE PROTEIN PUTATIVE UNDECAPRI                     | IV.G.2                                                                    |                                 |        |
| RSc0702 | RS01607 | -0,45 | 0,05  |       |       |      |       |       |       | OXIDOREDUCTASE COG1902, NADH:flavin oxidoreductases                                | I                                                                         |                                 |        |
| RSc0703 | RS01608 |       | 0,77  | 0,05  |       |      |       |       |       | COG0220, Predicted S-adenosylmethionine-dependent methyltransferase                | V.I.C                                                                     |                                 |        |
| RSc0704 | RS01609 |       | 0,52  | 0,01  |       |      |       |       |       | COG0388, Predicted amidohydrolase                                                  | V.I.C                                                                     |                                 |        |
| RSc0705 | RS01610 |       |       |       | 0,76  | 0,00 |       |       |       | TRANSMEMBRANE                                                                      | V.I.D                                                                     |                                 |        |
| RSc0706 | RS05147 |       | 0,32  | 0,03  | -0,53 | 0,00 |       |       |       | CONSERVED HYPOTHETICAL PROTEIN                                                     | V.I.C                                                                     |                                 |        |
| RSc0707 | RS05146 |       |       |       | -0,87 | 0,01 |       |       |       | HYPOTHETICAL PROTEIN                                                               | V.I.D                                                                     |                                 |        |
| RSc0708 | RS05145 |       | 0,78  | 0,01  | -0,68 | 0,01 |       |       | ubiD  | 3-OCTAPRENYL-4-HYDROXYBENZOATE CARBOXY-LYASE (POLYPRENYL P-HY)                     | I.B.5                                                                     |                                 |        |
| RSc0709 | RS05144 |       |       |       |       |      | 1,02  | 0,00  |       | TRANSMEMBRANE TRANSGLYCOSYLASE                                                     | V.I.B                                                                     |                                 |        |
| RSc0710 | RS05143 |       |       |       | 0,54  | 0,01 |       |       |       | AMINOTRANSFERASE                                                                   | I.F.14                                                                    |                                 |        |
| RSc0711 | RS05142 |       | 0,49  | 0,02  | -0,11 | 0,02 | 0,89  | 0,05  | nusB  | TRANSCRIPTION REGULATOR N UTILIZATION SUBSTANCE PROTEIN B (TRANS                   | II.B.6                                                                    |                                 |        |
| RSc0712 | RS05141 |       |       |       |       |      |       |       | ribH  | RIBOFLAVIN SYNTHASE (BETA CHAIN) : 6,7-DIMETHYL-8-RIBITYLLUMAZINE SY               | I.B.7                                                                     |                                 |        |
| RSc0713 | RS05140 |       | 0,35  | 0,03  | -0,34 | 0,01 | -0,71 | 0,00  | ribAB | RIBOFLAVIN BIOSYNTHESIS BIFUNCTIONAL PROTEIN : GTP CYCLOHYDROLASE                  | I.B.7                                                                     |                                 |        |
| RSc0714 | RS05139 |       |       |       |       |      |       |       | ribE  | RIBOFLAVIN SYNTHASE (ALPHA CHAIN)                                                  | I.B.7                                                                     |                                 |        |
| RSc0715 | RS05138 |       |       |       |       |      |       |       | ribD  | OXIDOREDUCTASE RIBOFLAVIN BIOSYNTHESIS BIFUNCTIONAL PROTEIN RIBD                   | I.B.7                                                                     |                                 |        |
| RSc0716 | RS05137 |       |       |       | -0,78 | 0,01 |       |       |       | TRANSMEMBRANE TYPE 4 FIMBRIAL PILIN RELATED PROTEIN                                | III.A.2                                                                   |                                 |        |
| RSc0717 | RS05136 |       |       |       |       |      |       |       |       | SIGNAL PEPTIDE TYPE-4 FRIMBRIAL PILIN-RELATED PROTEIN                              | III.A.2                                                                   |                                 |        |
| RSc0718 | RS05135 |       |       |       | -0,44 | 0,03 |       |       |       | TRANSMEMBRANE TYPE 4 FIMBRIAL BIOGENESIS PROTEIN PILY1-RELATED PFI                 | III.A.2                                                                   |                                 |        |
| RSc0719 | RS05134 |       |       |       | 0,94  | 0,00 |       |       |       | SIGNAL PEPTIDE TYPE 4 FIMBRIAL BIOGENESIS PILX-RELATED PROTEIN                     | III.A.2                                                                   |                                 |        |
| RSc0720 | RS05133 | -3,07 | 0,00  | -1,35 | 0,00  | 1,81 | 0,00  | 1,45  | 0,03  | TRANSMEMBRANE TYPE 4 FIMBRIAL BIOGENESIS PROTEIN PILW-RELATED PRI                  | III.A.2                                                                   |                                 |        |
| RSc0721 | RS05132 |       |       |       |       |      |       |       |       | TRANSMEMBRANE                                                                      | V.I.D                                                                     |                                 |        |
| RSc0722 | RS05131 |       |       |       |       |      |       |       |       | TRANSMEMBRANE TYPE 4 FIMBRIAL PILIN RELATED PROTEIN                                | III.A.2                                                                   |                                 |        |
| RSc0723 | RS05130 |       | 0,38  | 0,02  |       |      |       |       |       | TRANSMEMBRANE TYPE-4 FIMBRIAL PILIN-RELATED PROTEIN                                | III.A.2                                                                   |                                 |        |
| RSc0724 | RS05129 |       |       |       | -0,55 | 0,01 | 1,64  | 0,05  |       | SIGNAL PEPTIDE TYPE-4 FIMBRIAL BIOGENESIS PLY1-RELATED PROTEIN                     | III.A.2                                                                   |                                 |        |
| RSc0725 | RS05128 |       |       |       | -0,40 | 0,00 |       | -0,39 | 0,02  | TRANSMEMBRANE TYPE 4 FIMBRIAL BIOGENESIS PROTEIN PILX-RELATED PR                   | III.A.2                                                                   |                                 |        |
| RSc0726 | RS05127 |       | -0,61 | 0,00  | -0,20 | 0,01 | 1,40  | 0,00  |       | TRANSMEMBRANE TYPE 4 FIMBRIAL BIOGENESIS PROTEIN PILW RELATED PR                   | III.A.2                                                                   |                                 |        |
| RSc0727 | RS05126 |       |       |       | -0,67 | 0,04 |       |       |       | TRANSMEMBRANE TYPE-4 FIMBRIAL BIOGENESIS PILV-RELATED PROTEIN                      | III.A.2                                                                   |                                 |        |
| RSc0728 | RS05125 |       |       |       | -0,67 | 0,00 | 0,72  | 0,04  |       | COG1327, Predicted transcriptional regulator, consists of a Zn-ribbon and ATP-cone | V.I.A                                                                     |                                 |        |
| RSc0729 | RS05124 |       |       |       | -0,96 | 0,00 | 1,12  | 0,01  | 0,99  | 0,02                                                                               | glyA1                                                                     | SERINE HYDROXYMETHYLTRANSFERASE | I.A.11 |
| RSc0730 | RS05123 |       | 0,43  | 0,04  |       |      |       |       |       | OXIDOREDUCTASE                                                                     | I                                                                         |                                 |        |
| RSc0731 | RS05122 |       |       |       | -0,66 | 0,01 |       |       |       | THIOESTERASE                                                                       | I                                                                         |                                 |        |
| RSc0732 | RS05121 |       |       |       | -0,56 | 0,01 |       |       | tolI  | TRANSMEMBRANE TOLQ-RELATED TRANSPORT PROTEIN                                       | IV.E                                                                      |                                 |        |
| RSc0733 | RS05120 |       |       |       | -0,62 | 0,00 |       |       | tolR  | TRANSMEMBRANE TOLR-RELATED PROTEIN TRANSPORT                                       | IV.E                                                                      |                                 |        |
| RSc0734 | RS05119 |       |       |       | -0,74 | 0,00 |       |       | tolA  | TRANSMEMBRANE TOLA-RELATED TRANSPORT PROTEIN                                       | IV.E                                                                      |                                 |        |
| RSc0735 | RS05118 |       |       |       | -0,60 | 0,00 | 0,42  | 0,05  | tolB  | TOLB -RELATED TRANSPORT PROTEIN                                                    | IV.E                                                                      |                                 |        |
| RSc0736 | RS05117 |       |       |       | -0,47 | 0,00 |       |       | pal   | PEPTIDOGLYCAN-ASSOCIATED LIPOPROTEIN PRECURSOR                                     | III.B.3                                                                   |                                 |        |
| RSc0737 | RS05116 |       |       |       | -0,30 | 0,00 |       |       |       | TRANSMEMBRANE                                                                      | V.I.C                                                                     |                                 |        |
| RSc0738 | RS05115 |       |       |       | -0,30 | 0,04 |       |       |       | SIGNAL PEPTIDE COG0603, Predicted PP-loop superfamily ATPase                       | V.I.C                                                                     |                                 |        |
| RSc0739 | RS05114 |       | 0,44  | 0,01  |       |      |       | -0,69 | 0,02  | TRANSMEMBRANE                                                                      | V.I.C                                                                     |                                 |        |
| RSc0740 | RS05113 |       | 0,56  | 0,02  |       |      |       | 0,99  | 0,00  | TRANSMEMBRANE                                                                      | V.I.D                                                                     |                                 |        |
| RSc0741 | RS05112 |       | 0,45  | 0,05  | -0,67 | 0,02 | -0,82 | 0,00  | che   | TRANSCRIPTION REGULATOR CHEMOTAXIS RESPONSE REGULATOR PROTEI                       | IV.C                                                                      |                                 |        |
| RSc0742 | RS05111 |       | 0,68  | 0,01  | -1,10 | 0,00 |       |       | cheZ2 | CHEMOTAXIS PROTEIN CHEZ                                                            | IV.C                                                                      |                                 |        |
| RSc0743 | RS05110 |       | 0,53  | 0,00  | -0,39 | 0,01 |       |       | aroG2 | PHOSPHO-2-DEHYDRO-3-DEOXYHEPTONATE ALDOLASE, PHE-SENSITIVE (DA                     | I.A.5                                                                     |                                 |        |
| RSc0744 | RS05109 |       |       |       | -0,51 | 0,00 |       |       |       | DNA/RNA NON-SPECIFIC ENDONUCLEASE                                                  | I.A                                                                       |                                 |        |
| RSc0745 | RS05108 |       |       |       |       |      |       |       |       | COG3613, Nucleoside 2-deoxyribosyltransferase                                      | I                                                                         |                                 |        |
| RSc0746 | RS05107 |       | 0,66  | 0,01  |       |      |       |       | tauD  | OXIDOREDUCTASE ALPHA-KETOGLUTARATE-DEPENDENT TAURINE DIOXYGE                       | II.1.2                                                                    |                                 |        |
| RSc0747 | RS05106 |       |       |       |       |      |       |       |       | CONSERVED HYPOTHETICAL PROTEIN                                                     | V.I.C                                                                     |                                 |        |
| RSc0748 | RS05105 |       |       |       | -0,36 | 0,03 | -1,03 | 0,05  | -0,69 | 0,00                                                                               | ABC TRANSPORTER COG0390, ABC-type uncharacterized transport system, perme | IV.D                            |        |
| RSc0749 | RS05104 |       |       |       | -0,33 | 0,02 |       |       |       | ABC TRANSPORTER ATP-BINDING PROTEIN                                                | IV.D                                                                      |                                 |        |
| RSc0750 | RS05103 |       |       |       | -1,20 | 0,00 |       |       |       | TRANSMEMBRANE                                                                      | IV.B                                                                      |                                 |        |
| RSc0751 | RS05102 |       |       |       | -0,80 | 0,00 |       |       |       | CONSERVED HYPOTHETICAL PROTEIN                                                     | V.I.C                                                                     |                                 |        |
| RSc0752 | RS05101 |       |       |       | -0,41 | 0,00 |       |       |       | TRANSMEMBRANE                                                                      | V.I.C                                                                     |                                 |        |
| RSc0753 | RS05100 |       |       |       |       |      |       |       |       | TRANSMEMBRANE                                                                      | V.I.C                                                                     |                                 |        |
| RSc0754 | RS05099 |       |       |       | -0,27 | 0,02 | -0,59 | 0,02  |       | OXIDOREDUCTASE ANTIOXIDANT PROTEIN (PEROXIDASE)                                    | IV.G.4                                                                    |                                 |        |
| RSc0755 | RS05098 |       |       |       |       |      |       |       |       | TRANSMEMBRANE COG2252, Permeases                                                   | IV.D                                                                      |                                 |        |
| RSc0756 | RS05097 |       | 0,62  | 0,02  |       |      |       |       | gcdH  | OXIDOREDUCTASE GLUTARYL-CoA DEHYDROGENASE                                          | II.3                                                                      |                                 |        |
| RSc0757 | RS05096 |       |       |       |       |      |       |       |       | TRANSCRIPTION REGULATOR                                                            | V.I.A                                                                     |                                 |        |
| RSc0758 | RS05095 |       |       |       | 0,34  | 0,01 |       |       | kynA  | OXIDOREDUCTASE Tryptophan 2,3-dioxygenase                                          | II.3                                                                      |                                 |        |
| RSc0759 | RS05094 |       |       |       | 0,43  | 0,01 |       |       | kynU  | KYNURENINASE                                                                       | II.3                                                                      |                                 |        |
| RSc0760 | RS05093 |       |       |       |       |      |       |       | kynB  | KYNURENINE FORMIDASE                                                               | II.3                                                                      |                                 |        |
| RSc0761 | RS05092 |       |       |       | -0,77 | 0,00 |       |       |       | TRANSCRIPTION REGULATOR                                                            | V.I.A                                                                     |                                 |        |
| RSc0762 | RS05091 |       | 0,85  | 0,03  | -0,43 | 0,02 |       |       |       | CONSERVED HYPOTHETICAL PROTEIN                                                     | V.I.C                                                                     |                                 |        |
| RSc0763 | RS05090 |       | 0,24  | 0,05  |       |      |       |       |       | OXIDOREDUCTASE MONOOXYGENASE                                                       | I                                                                         |                                 |        |
| RSc0764 | RS05089 | -0,54 | 0,04  |       | -0,65 | 0,04 |       |       | msrA  | OXIDOREDUCTASE PEPTIDE METHIONINE SULFOXIDE REDUCTASE                              | IV.B                                                                      |                                 |        |
| RSc0765 | RS05088 |       |       |       |       |      |       |       |       | CONSERVED HYPOTHETICAL PROTEIN                                                     | V.I.C                                                                     |                                 |        |
| RSc0766 | RS05087 |       |       |       | -0,80 | 0,00 |       |       | cfa2  | CYCLOPROPANE-FATTY-ACYL-PHOSPHOLIPID SYNTHASE                                      | I.C                                                                       |                                 |        |
| RSc0767 | RS05086 |       | 0,75  | 0,05  |       |      |       |       | pdxH1 | OXIDOREDUCTASE PYRIDOXAMINE 5'-PHOSPHATE OXIDASE (PNP/PMP OXIDA                    | I.B.10                                                                    |                                 |        |
| RSc0768 | RS05151 |       |       |       |       |      |       |       |       | HYPOTHETICAL PROTEIN                                                               | V.I.D                                                                     |                                 |        |
| RSc0769 | RS05085 |       | 0,84  | 0,01  |       |      |       |       |       | HYDROLASE GLYCOSIDASE                                                              | II.4                                                                      |                                 |        |
| RSc0770 | RS05084 |       |       |       | -1,00 | 0,01 |       |       |       | OXIDOREDUCTASE TRANSMEMBRANE DEHYDROGENASE (SMALL SUBUNIT)                         | I                                                                         |                                 |        |
| RSc0771 | RS05083 |       |       |       |       |      |       |       |       | OXIDOREDUCTASE TRANSMEMBRANE DEHYDROGENASE (LARGE SUBUNIT)                         | I                                                                         |                                 |        |
| RSc0772 | RS05082 |       |       |       |       |      |       |       |       | SIGNAL PEPTIDE OXIDOREDUCTASE DEHYDROGENASE (CYTOCHROME C SUE                      | I.G.1                                                                     |                                 |        |
| RSc0773 | RS05081 |       |       |       |       |      |       |       | asmA  | TRANSMEMBRANE COG2982, Uncharacterized protein involved in outer membrane          | IV.C                                                                      |                                 |        |
| RSc0774 | RS05080 |       |       |       |       |      |       |       |       | TRANSMEMBRANE COG1179, Dinucleotide-utilizing enzyme involved in molybdopter       | I.B                                                                       |                                 |        |
| RSc0775 | RS05079 |       | 0,80  | 0,00  | 0,32  | 0,02 |       |       | katGb | OXIDOREDUCTASE PEROXIDASE/CATALASE (CATA PROTEIN)                                  | IV.G.4                                                                    |                                 |        |
| RSc0777 | RS05077 |       |       |       |       |      |       |       |       | COG2703, Hemerythrin                                                               | IV.D.5                                                                    |                                 |        |
| RSc0778 | RS05076 |       |       |       | -0,28 | 0,05 |       |       |       | COG3531, Predicted protein-disulfide isomerase                                     | II.B.6                                                                    |                                 |        |
| RSc0779 | RS05075 |       | 0,82  | 0,01  |       |      |       |       |       | THIOREDOXIN                                                                        | I.B.6                                                                     |                                 |        |
| RSc0780 | RS05058 |       |       |       | -0,57 | 0,03 |       |       | fadD2 | LONG-CHAIN-FATTY-ACID-CoA LIGASE                                                   | II.1.1                                                                    |                                 |        |
| RSc0781 | RS05057 |       |       |       |       |      |       |       |       | SIGNAL PEPTIDE ANKYRIN REPEAT HARBORING PROTEIN                                    | V.I.C                                                                     |                                 |        |
| RSc0782 | RS05056 |       |       |       | -0,78 | 0,01 | -0,44 | 0,02  |       | COG3703, Uncharacterized protein involved in cation transport                      | IV.D.4                                                                    |                                 |        |
| RSc0783 | RS05055 |       |       |       | -0,94 | 0,05 |       |       |       | TRANSMEMBRANE                                                                      | IV.D                                                                      |                                 |        |
| RSc0784 | RS05054 |       | 0,48  | 0,01  |       |      |       |       | fkpA  | FKBP-TYPE PEPTIDYL-PROLYL CIS-TRANS ISOMERASE (PPIASE)(IMMUNOPHIL                  | IV.B                                                                      |                                 |        |
| RSc0785 | RS05053 |       | 0,66  | 0,01  |       |      |       |       |       | CONSERVED HYPOTHETICAL PROTEIN                                                     | V.I.C                                                                     |                                 |        |
| RSc0786 | RS05051 |       |       |       | -0,94 | 0,00 |       |       |       | CONSERVED HYPOTHETICAL PROTEIN                                                     | V.I.C                                                                     |                                 |        |
| RSc0787 | RS05050 |       |       |       | -0,63 | 0,03 |       |       |       | TRANSMEMBRANE                                                                      | V.I.C                                                                     |                                 |        |
| RSc0788 | RS05049 |       |       |       |       |      | 0,49  | 0,02  |       | TRANSMEMBRANE                                                                      | V.I.C                                                                     |                                 |        |
| RSc0789 | RS05048 |       | 0,50  | 0,05  |       |      |       | -0,25 | 0,04  | CONSERVED HYPOTHETICAL PROTEIN                                                     | V.I.C                                                                     |                                 |        |
| RSc0790 | RS05047 |       | 0,76  | 0,00  |       |      |       |       |       | SIGNAL PEPTIDE                                                                     | V.I.C                                                                     |                                 |        |

|         |         |       |      |       |      |       |       |       |                                                                                |                                                                              |                                       |                                                                |         |                      |       |
|---------|---------|-------|------|-------|------|-------|-------|-------|--------------------------------------------------------------------------------|------------------------------------------------------------------------------|---------------------------------------|----------------------------------------------------------------|---------|----------------------|-------|
| RSc0791 | RS05046 |       |      | -0.35 | 0.00 | 0.84  | 0.00  | glnS  | GLUTAMINYL-tRNA SYNTHETASE                                                     | II.D.1                                                                       |                                       |                                                                |         |                      |       |
| RSc0792 | RS05045 |       |      |       |      |       |       |       | CONSERVED HYPOTHETICAL PROTEIN                                                 | V.I.C                                                                        |                                       |                                                                |         |                      |       |
| RSc0793 | RS05044 | 1.60  | 0.00 | -0.60 | 0.00 |       |       |       | TRANSMEMBRANE                                                                  | V.I.C                                                                        |                                       |                                                                |         |                      |       |
| RSc0794 | RS05043 | 1.60  | 0.02 | -0.85 | 0.02 |       |       |       | TRANSMEMBRANE                                                                  | V.I.C                                                                        |                                       |                                                                |         |                      |       |
| RSc0795 | RS05042 | 0.54  | 0.04 | -0.34 | 0.01 |       |       |       | TRANSMEMBRANE                                                                  | V.I.C                                                                        |                                       |                                                                |         |                      |       |
| RSc0796 | RS05041 | 0.68  | 0.04 | -0.39 | 0.02 |       |       | alaS  | TRANSMEMBRANE COG1804, Predicted acyl-CoA transferases/carnitine dehydratase I | II.D.1                                                                       |                                       |                                                                |         |                      |       |
| RSc0797 | RS05040 | 0.43  | 0.02 |       |      | -0.77 | 0.03  |       | ALANYL-tRNA SYNTHETASE                                                         | II.D.1                                                                       |                                       |                                                                |         |                      |       |
| RSc0798 | RS05039 |       |      | -0.64 | 0.00 |       |       |       | PURINE NUCLEOSIDE PERMEASE                                                     | IV.D.6                                                                       |                                       |                                                                |         |                      |       |
| RSc0799 | RS05038 | 0.40  | 0.02 | -0.40 | 0.02 |       |       |       | PURINE NUCLEOSIDE PERMEASE                                                     | IV.D.6                                                                       |                                       |                                                                |         |                      |       |
| RSc0800 | RS05037 |       |      |       |      | -1.93 | 0.05  |       | SIGNAL PEPTIDE FERRISIDEROPHORE RECEPTOR                                       | IV.D.5                                                                       |                                       |                                                                |         |                      |       |
| RSc0801 | RS05036 | 0.70  | 0.02 | -1.05 | 0.00 |       |       |       | TRANSMEMBRANE LIPOPROTEIN                                                      | V.I.C                                                                        |                                       |                                                                |         |                      |       |
| RSc0802 | RS05031 |       |      |       |      |       |       |       | TRANSMEMBRANE COG0330, Membrane protease subunit, stomatin/prohibitin homc     | II.A.4                                                                       |                                       |                                                                |         |                      |       |
| RSc0803 | RS05027 | -0.62 | 0.02 | -0.54 | 0.00 |       |       |       | TRANSMEMBRANE COG1030, Membrane-bound serine protease (ClpP class)             | II.A.4                                                                       |                                       |                                                                |         |                      |       |
| RSc0804 | RS05024 |       |      | -0.62 | 0.00 |       |       |       | TRANSCRIPTION REGULATOR                                                        | V.I.A                                                                        |                                       |                                                                |         |                      |       |
| RSc0805 | RS05064 | -0.59 | 0.00 | 0.88  | 0.00 |       |       |       | CONSERVED HYPOTHETICAL PROTEIN                                                 | V.I.C                                                                        |                                       |                                                                |         |                      |       |
| RSc0806 | RS05016 |       |      |       |      |       |       |       | ALDOLASE                                                                       | I                                                                            |                                       |                                                                |         |                      |       |
| RSc0807 | RS05015 |       |      |       |      |       |       |       | TAUTOMERASE (4-OXALOCROTONATE TAUTOMERASE)                                     | II.A                                                                         |                                       |                                                                |         |                      |       |
| RSc0808 | RS05014 | 0.55  | 0.02 |       |      |       |       | ItaA  | LOW SPECIFICITY L-THREONINE ALDOLASE                                           | II.A.11                                                                      |                                       |                                                                |         |                      |       |
| RSc0809 | RS05013 |       |      | -0.53 | 0.00 |       |       |       | HYDROLASE                                                                      | II                                                                           |                                       |                                                                |         |                      |       |
| RSc0810 | RS05012 |       |      | -0.39 | 0.02 | -0.71 | 0.01  |       | COG0425, Predicted redox protein, regulator of disulfide bond formation        | II.B.7                                                                       |                                       |                                                                |         |                      |       |
| RSc0811 | RS05011 |       |      |       |      |       |       | sirA  | OXIDOREDUCTASE SULFITE:CYTOCHROME C OXIDOREDUCTASE (SUBUNIT B)                 | II.F.3                                                                       |                                       |                                                                |         |                      |       |
| RSc0812 | RS05010 |       |      | 1.40  | 0.00 | 2.45  | 0.00  | sorB  | OXIDOREDUCTASE SULFITE:CYTOCHROME C OXIDOREDUCTASE (SUBUNIT A)                 | II.F.3                                                                       |                                       |                                                                |         |                      |       |
| RSc0813 | RS05009 | 0.51  | 0.00 | 0.49  | 0.00 | 0.73  | 0.02  | sorAb | OXIDOREDUCTASE SULFITE:CYTOCHROME C OXIDOREDUCTASE (SUBUNIT A)                 | II.F.3                                                                       |                                       |                                                                |         |                      |       |
| RSc0814 | RS05008 |       |      | -0.83 | 0.00 |       |       |       | TRANSMEMBRANE COG1280, Threonine efflux protein                                | IV.D.2                                                                       |                                       |                                                                |         |                      |       |
| RSc0815 | RS05007 |       |      | -1.18 | 0.00 |       |       |       | TRANSMEMBRANE                                                                  | V.I.B                                                                        |                                       |                                                                |         |                      |       |
| RSc0816 | RS05006 |       |      |       |      |       |       |       | TRANSCRIPTION REGULATOR COG1733, Transcriptional regulator                     | V.I.A                                                                        |                                       |                                                                |         |                      |       |
| RSc0817 | RS05005 |       |      | -0.48 | 0.00 |       |       | gstD  | GLUTATHIONE S-TRANSFERASE                                                      | II.B.7                                                                       |                                       |                                                                |         |                      |       |
| RSc0818 | RS05004 |       |      |       |      |       |       |       | COG4305, Endoglucanase C-terminal domain/subunit and related proteins          | II.A.3                                                                       |                                       |                                                                |         |                      |       |
| RSc0819 | RS05003 |       |      | 1.52  | 0.00 |       |       |       | COG5485, Ester cyclase                                                         | I                                                                            |                                       |                                                                |         |                      |       |
| RSc0820 | RS05179 | 1.53  | 0.04 |       |      |       |       |       | TRANSCRIPTION REGULATOR                                                        | V.I.A                                                                        |                                       |                                                                |         |                      |       |
| RSc0821 | RS05178 |       |      |       |      |       |       |       | NADPH NITROREDUCTASE                                                           | I                                                                            |                                       |                                                                |         |                      |       |
| RSc0822 | RS05171 |       |      |       |      |       |       |       | CONSERVED HYPOTHETICAL PROTEIN                                                 | V.I.B                                                                        |                                       |                                                                |         |                      |       |
| RSc0823 | RS05169 |       |      | -0.89 | 0.00 | -2.07 | 0.01  |       | HYPOTHETICAL PROTEIN                                                           | V.I.D                                                                        |                                       |                                                                |         |                      |       |
| RSc0824 | RS05166 |       |      | -1.73 | 0.02 | 2.39  | 0.00  |       | CONSERVED HYPOTHETICAL PROTEIN                                                 | V.I.C                                                                        |                                       |                                                                |         |                      |       |
| RSc0825 | RS06018 | -1.32 | 0.05 | -2.16 | 0.00 | 3.98  | 0.00  |       | HYPOTHETICAL PROTEIN                                                           | V.I.D                                                                        |                                       |                                                                |         |                      |       |
| RSc0826 | RS05162 |       |      | -1.73 | 0.00 | 3.60  | 0.00  |       | TYPE III EFFECTOR PROTEIN POPP1                                                | V.I.E                                                                        |                                       |                                                                |         |                      |       |
| RSc0827 | RS05161 |       |      |       |      |       |       | popP1 | CONSERVED HYPOTHETICAL PROTEIN                                                 | V.I.C                                                                        |                                       |                                                                |         |                      |       |
| RSc0830 | RS05157 |       |      |       |      |       |       |       | CONSERVED HYPOTHETICAL PROTEIN                                                 | V.I.C                                                                        |                                       |                                                                |         |                      |       |
| RSc0831 | RS05156 |       |      | -0.34 | 0.01 | -2.37 | 0.02  | secA2 | Preprotein translocase subunit SecA (ATPase, RNA helicase) - related protein   | IV.E.2                                                                       |                                       |                                                                |         |                      |       |
| RSc0832 | RS05155 |       |      | -0.52 | 0.00 |       |       |       | HYPOTHETICAL PROTEIN                                                           | V.I.D                                                                        |                                       |                                                                |         |                      |       |
| RSc0833 | RS04994 |       |      | -1.17 | 0.01 |       |       |       | HYPOTHETICAL PROTEIN                                                           | V.I.B                                                                        |                                       |                                                                |         |                      |       |
| RSc0834 | RS04993 |       |      |       |      |       |       |       | HYPOTHETICAL PROTEIN                                                           | V.I.B                                                                        |                                       |                                                                |         |                      |       |
| RSc0835 | RS04991 |       |      |       |      |       |       |       | CONSERVED HYPOTHETICAL PROTEIN                                                 | V.I.C                                                                        |                                       |                                                                |         |                      |       |
| RSc0836 | RS04990 |       |      | -0.63 | 0.00 |       |       |       | CONSERVED HYPOTHETICAL PROTEIN                                                 | V.I.C                                                                        |                                       |                                                                |         |                      |       |
| RSc0837 | RS04989 |       |      |       |      |       |       |       | CONSERVED HYPOTHETICAL PROTEIN                                                 | V.I.C                                                                        |                                       |                                                                |         |                      |       |
| RSc0838 | RS04988 |       |      | -1.01 | 0.04 |       |       |       | HYPOTHETICAL PROTEIN                                                           | V.I.D                                                                        |                                       |                                                                |         |                      |       |
| RSc0839 | RS04987 |       |      | -0.70 | 0.00 |       |       |       | BACTERIOPHAGE-RELATED PROTEIN                                                  | V.D                                                                          |                                       |                                                                |         |                      |       |
| RSc0840 | RS04985 |       |      | -2.87 | 0.03 |       |       |       | CONSERVED HYPOTHETICAL PROTEIN                                                 | V.I.C                                                                        |                                       |                                                                |         |                      |       |
| RSc0841 | RS04984 |       |      |       |      |       |       |       | CONSERVED HYPOTHETICAL PROTEIN                                                 | V.I.C                                                                        |                                       |                                                                |         |                      |       |
| RSc0842 | RS05150 |       |      | -1.04 | 0.00 | -1.40 | 0.00  |       | HYPOTHETICAL PROTEIN                                                           | V.I.D                                                                        |                                       |                                                                |         |                      |       |
| RSc0844 | RS04982 |       |      |       |      |       |       |       | COG0863, DNA modification methylase                                            | II.B.8                                                                       |                                       |                                                                |         |                      |       |
| RSc0845 | RS04981 |       |      |       |      |       |       |       | COG0863, DNA modification methylase                                            | II.B.8                                                                       |                                       |                                                                |         |                      |       |
| RSc0846 | RS04979 |       |      |       |      |       |       |       | HYPOTHETICAL PROTEIN                                                           | V.I.D                                                                        |                                       |                                                                |         |                      |       |
| RSc0847 | RS04978 |       |      |       |      |       |       |       | HYPOTHETICAL PROTEIN                                                           | V.I.B                                                                        |                                       |                                                                |         |                      |       |
| RSc0848 | RS04976 | 0.54  | 0.05 |       |      |       |       |       | CONSERVED HYPOTHETICAL PROTEIN                                                 | V.I.C                                                                        |                                       |                                                                |         |                      |       |
| RSc0849 | RS04974 |       |      |       |      |       |       |       | CONSERVED HYPOTHETICAL PROTEIN                                                 | V.I.C                                                                        |                                       |                                                                |         |                      |       |
| RSc0850 | RS04972 |       |      | -0.56 | 0.00 |       | 0.90  | 0.02  | CONSERVED HYPOTHETICAL PROTEIN                                                 | V.I.C                                                                        |                                       |                                                                |         |                      |       |
| RSc0851 | RS04971 |       |      | -0.51 | 0.03 |       |       |       | HYPOTHETICAL PROTEIN                                                           | V.I.D                                                                        |                                       |                                                                |         |                      |       |
| RSc0852 | RS04970 |       |      | -1.88 | 0.03 | 0.60  | 0.03  | 0.47  | 0.01                                                                           | BACTERIOPHAGE-RELATED PROTEIN                                                | V.D                                   |                                                                |         |                      |       |
| RSc0853 | RS04968 |       |      | -0.72 | 0.03 |       |       |       | BACTERIOPHAGE-RELATED PROTEIN                                                  | V.D                                                                          |                                       |                                                                |         |                      |       |
| RSc0854 | RS04967 |       |      |       |      |       |       |       | HYPOTHETICAL PROTEIN                                                           | V.I.D                                                                        |                                       |                                                                |         |                      |       |
| RSc0855 | RS04966 |       |      |       |      | 0.55  | 0.01  |       | HYPOTHETICAL PROTEIN                                                           | V.I.D                                                                        |                                       |                                                                |         |                      |       |
| RSc0856 | RS04965 |       |      |       |      |       |       |       | HYPOTHETICAL PROTEIN                                                           | V.I.D                                                                        |                                       |                                                                |         |                      |       |
| RSc0857 | RS04964 |       |      |       |      |       |       |       | BACTERIOPHAGE-RELATED PROTEIN                                                  | V.D                                                                          |                                       |                                                                |         |                      |       |
| RSc0858 | RS04963 |       |      |       |      |       |       |       | BACTERIOPHAGE-RELATED PROTEIN                                                  | V.D                                                                          |                                       |                                                                |         |                      |       |
| RSc0859 | RS04962 |       |      | -1.00 | 0.02 |       |       |       | BACTERIOPHAGE-RELATED PROTEIN                                                  | V.D                                                                          |                                       |                                                                |         |                      |       |
| RSc0860 | RS04958 |       |      | -1.14 | 0.01 |       |       |       | BACTERIOPHAGE-RELATED PROTEIN                                                  | V.D                                                                          |                                       |                                                                |         |                      |       |
| RSc0861 | RS04956 |       |      |       |      |       |       |       | HYPOTHETICAL PROTEIN                                                           | V.I.D                                                                        |                                       |                                                                |         |                      |       |
| RSc0862 | RS04955 |       |      |       |      |       |       |       | SIGNAL PEPTIDE                                                                 | V.I.D                                                                        |                                       |                                                                |         |                      |       |
| RSc0863 | RS04954 |       |      |       |      |       |       |       | CONSERVED HYPOTHETICAL PROTEIN                                                 | V.I.C                                                                        |                                       |                                                                |         |                      |       |
| RSc0864 | RS04952 |       |      |       |      |       |       |       | CONSERVED HYPOTHETICAL PROTEIN                                                 | V.I.C                                                                        |                                       |                                                                |         |                      |       |
| RSc0865 | RS04953 |       |      |       |      |       |       |       | HYPOTHETICAL PROTEIN                                                           | V.I.D                                                                        |                                       |                                                                |         |                      |       |
| RSc0866 | RS04951 |       |      |       |      |       |       |       | HYPOTHETICAL PROTEIN                                                           | V.I.B                                                                        |                                       |                                                                |         |                      |       |
| RSc0867 | RS04950 |       |      | 0.55  | 0.02 |       | -0.56 | 0.05  | TRANSCRIPTION REGULATOR HNS-LIKE PROTEIN                                       | V.I.A                                                                        |                                       |                                                                |         |                      |       |
| RSc0868 | RS04882 |       |      | -3.39 | 0.00 | 4.25  | 0.00  | 2.87  | 0.00                                                                           | popP2                                                                        | TYPE III EFFECTOR PROTEIN POPP2       | V.I.E                                                          |         |                      |       |
| RSc0869 | RS04946 |       |      |       |      |       |       |       | BACTERIOPHAGE CYTOSINE-SPECIFIC METHYLTRANSFERASE                              | II.B.8                                                                       |                                       |                                                                |         |                      |       |
| RSc0870 | RS04945 |       |      |       |      |       |       |       | HYPOTHETICAL PROTEIN                                                           | V.I.B                                                                        |                                       |                                                                |         |                      |       |
| RSc0871 | RS04877 |       |      | -0.33 | 0.00 | -0.57 | 0.05  | -0.19 | 0.02                                                                           | PLASMID STABILITY-LIKE PROTEIN                                               | V.B                                   |                                                                |         |                      |       |
| RSc0872 | RS04874 |       |      |       |      | -0.89 | 0.00  | -0.51 | 0.01                                                                           | CONSERVED HYPOTHETICAL PROTEIN                                               | V.I.C                                 |                                                                |         |                      |       |
| RSc0873 | RS04872 |       |      |       |      |       |       |       | TRANSMEMBRANE BACTERIOPHAGE-RELATED PROTEIN                                    | V.D                                                                          |                                       |                                                                |         |                      |       |
| RSc0874 | RS04870 |       |      |       |      |       |       |       | TRANSMEMBRANE                                                                  | V.I.D                                                                        |                                       |                                                                |         |                      |       |
| RSc0875 | RS04868 |       |      |       |      |       |       |       | CONSERVED HYPOTHETICAL PROTEIN                                                 | V.I.C                                                                        |                                       |                                                                |         |                      |       |
| RSc0876 | RS04866 |       |      |       |      |       |       |       | CONSERVED HYPOTHETICAL PROTEIN                                                 | V.I.C                                                                        |                                       |                                                                |         |                      |       |
| RSc0877 | RS04865 |       |      |       |      |       |       |       | HYPOTHETICAL PROTEIN                                                           | V.I.D                                                                        |                                       |                                                                |         |                      |       |
| RSc0878 | RS04864 |       |      |       |      |       |       |       | HYPOTHETICAL PROTEIN                                                           | V.I.D                                                                        |                                       |                                                                |         |                      |       |
| RSc0879 | RS04863 |       |      |       |      | -0.56 | 0.05  |       | TRANSMEMBRANE                                                                  | V.I.B                                                                        |                                       |                                                                |         |                      |       |
| RSc0880 | RS04862 |       |      | -0.42 | 0.03 |       |       |       | CONSERVED HYPOTHETICAL PROTEIN                                                 | V.I.C                                                                        |                                       |                                                                |         |                      |       |
| RSc0881 | RS04861 |       |      |       |      |       |       |       | TRANSMEMBRANE                                                                  | V.I.C                                                                        |                                       |                                                                |         |                      |       |
| RSc0882 | RS04860 |       |      |       |      |       |       |       | TRANSMEMBRANE                                                                  | V.I.C                                                                        |                                       |                                                                |         |                      |       |
| RSc0883 | RS04859 |       |      |       |      |       |       |       | LYSOZYME (ENDOLYSIN)                                                           | II.A.4                                                                       |                                       |                                                                |         |                      |       |
| RSc0884 | RS04858 |       |      |       |      |       |       |       | CONSERVED HYPOTHETICAL PROTEIN                                                 | V.I.C                                                                        |                                       |                                                                |         |                      |       |
| RSc0885 | RS04857 |       |      | -0.45 | 0.01 |       |       |       | CONSERVED HYPOTHETICAL PROTEIN                                                 | V.I.C                                                                        |                                       |                                                                |         |                      |       |
| RSc0886 | RS04856 |       |      | 1.11  | 0.00 | -0.60 | 0.02  |       | CONSERVED HYPOTHETICAL PROTEIN                                                 | V.I.C                                                                        |                                       |                                                                |         |                      |       |
| RSc0887 | RS04855 |       |      |       |      |       |       |       | HEMAGGLUTININ-RELATED PROTEIN                                                  | V.I.C                                                                        |                                       |                                                                |         |                      |       |
| RSc0888 | RS04850 |       |      | -0.61 | 0.00 |       |       |       | ACTIVATION/SECRETION PROTEIN                                                   | IV.E.2                                                                       |                                       |                                                                |         |                      |       |
| RSc0889 | RS04841 |       |      |       |      |       |       |       | COG3677, Transposase and inactivated derivatives                               | V.A                                                                          |                                       |                                                                |         |                      |       |
| RSc0890 | RS04839 |       |      | -1.50 | 0.01 |       |       |       | BACTERIOPHAGE RELATED PROTEIN                                                  | V.D                                                                          |                                       |                                                                |         |                      |       |
| RSc0891 | RS04522 |       |      |       |      | -1.26 | 0.00  |       | SITE-SPECIFIC INTEGRASE/RECOMBINASE                                            | V                                                                            |                                       |                                                                |         |                      |       |
| RSc0892 | RS04521 |       |      |       |      |       |       |       | PHAGE-RELATED PROTEIN                                                          | V.D                                                                          |                                       |                                                                |         |                      |       |
| RSc0893 | RS04520 |       |      | -1.35 | 0.00 | 3.00  | 0.00  | 2.22  | 0.00                                                                           | TRANSPOSAE                                                                   | V.A                                   |                                                                |         |                      |       |
| RSc0894 | RS05563 |       |      | -7.01 | 0.00 | 7.46  | 0.00  | 4.88  | 0.00                                                                           | SIGNAL PEPTIDE                                                               | V.I.C                                 |                                                                |         |                      |       |
| RSc0895 | RS04524 |       |      | -1.47 | 0.00 | -4.10 | 0.00  | 3.88  | 0.00                                                                           | 2.98                                                                         | 0.00                                  | -1.36                                                          | 0.00    | HYPOTHETICAL PROTEIN | V.I.B |
| RSc0896 | RS04519 |       |      |       |      | -0.55 | 0.01  |       |                                                                                | TRANSMEMBRANE                                                                | V.I.C                                 |                                                                |         |                      |       |
| RSc0897 | RS04518 |       |      |       |      | -0.33 | 0.00  |       |                                                                                | COG0546, Phosphatase                                                         | I                                     |                                                                |         |                      |       |
| RSc0898 | RS04517 |       |      |       |      |       |       |       | 3-DEMETHYLBUBIQUINONE-9 3-METHYLTRANSFERASE                                    | I.B.5                                                                        |                                       |                                                                |         |                      |       |
| RSc0899 | RS04516 |       |      | -0.46 | 0.03 |       |       | 0.80  | 0.01                                                                           | TRANSMEMBRANE OUTER MEMBRANE LIPOPROTEIN                                     | III.B.2                               |                                                                |         |                      |       |
| RSc0900 | RS04515 |       |      | 0.37  | 0.00 | -0.25 | 0.05  | 0.51  | 0.02                                                                           | SIGNAL PEPTIDE COG2885, Outer membrane protein and related peptidoglycan-ass | III.B.2                               |                                                                |         |                      |       |
| RSc0901 | RS04514 | -0.38 | 0.05 | 0.56  | 0.01 |       |       |       |                                                                                | DNA GYRASE (SUBUNIT A)(TYPE II TOPOISOMERASE)                                | II.B.8                                |                                                                |         |                      |       |
| RSc0902 | RS04513 |       |      |       |      | -0.48 | 0.00  |       |                                                                                | SIGNAL PEPTIDE                                                               | V.I.C                                 |                                                                |         |                      |       |
| RSc0903 | RS04512 | -0.24 | 0.03 | 0.30  | 0.00 |       |       | -0.70 | 0.00                                                                           | serC                                                                         | PHOSPHOSERINE AMINOTRANSFERASE (PSAT) | II.A.10                                                        |         |                      |       |
| RSc0904 | RS04511 |       |      | 0.71  | 0.01 | -0.38 | 0.00  |       | -0.66                                                                          | 0.04                                                                         | pheA                                  | BIFUNCTIONAL PROTEIN: CHORISMATE MUTASE AND PREPHENATE DEHYDR. | II.F.14 |                      |       |
| RSc0905 | RS04510 |       |      | 0.67  | 0.00 |       |       |       |                                                                                | hisC2                                                                        | HISTIDINOL-PHOSPHATE AMINOTRANSFERASE | II.A.4                                                         |         |                      |       |



|         |         |      |      |       |      |       |      |      |                                                                                 |         |
|---------|---------|------|------|-------|------|-------|------|------|---------------------------------------------------------------------------------|---------|
| RSc0906 | RS04509 | 0.49 | 0.01 | -0.59 | 0.00 | -0.68 | 0.03 | tyrA | OXIDOREDUCTASE PREPHENATE DEHYDROGENASE                                         | I.A.7   |
| RSc0907 | RS04508 | 0.77 | 0.00 | -0.29 | 0.01 |       |      | aroA | 3-PHOSPHOSHIKIMATE 1-CARBOXYVINYLTRANSFERASE (EPSP SYNTHASE)                    | I.A.5   |
| RSc0908 | RS04507 | 0.89 | 0.01 | -0.28 | 0.04 |       |      | cmk  | CYTIDYLATE KINASE                                                               | I.D.1   |
| RSc0909 | RS04506 | 0.45 | 0.02 | -0.30 | 0.01 | 0.80  | 0.00 | rpsA | 30S RIBOSOMAL SUBUNIT PROTEIN S1                                                | III.C.2 |
| RSc0910 | RS04505 |      |      |       |      |       |      | ihfB | INTEGRATION HOST FACTOR BETA-SUBUNIT (IHFB-BETA)                                | V.D     |
| RSc0911 | RS04504 |      |      | -0.42 | 0.00 |       |      |      | TRANSMEMBRANE                                                                   | V.I.C   |
| RSc0912 | RS04503 |      |      | -0.42 | 0.02 |       |      |      | TRANSMEMBRANE COG2956, Predicted N-acetylglucosaminyl transferase               | II      |
| RSc0913 | RS04502 |      |      | -0.73 | 0.01 | -1.37 | 0.00 | ugd  | OXIDOREDUCTASE UDP-GLUCOSE 6-DEHYDROGENASE (UDG PROTEIN)                        | III.A.1 |
| RSc0914 | RS04501 |      |      | -0.63 | 0.04 |       |      | rfaE | ADP-HEPTOSE SYNTHASE                                                            | II.B.2  |
| RSc0915 | RS04500 |      |      |       |      | -0.44 | 0.01 | rfaD | ADP-L-GLYCERO-D-MANNO-HEPTOSE-6-EPIMERASE                                       | I.B     |
| RSc0916 | RS04499 |      |      | -0.79 | 0.00 | -0.53 | 0.04 |      | SIGNAL PEPTIDE                                                                  | V.I.C   |
| RSc0917 | RS04497 |      |      |       |      |       |      | cysM | CYSTEINE SYNTHASE B (CSASE B)                                                   | I.A.9   |
| RSc0918 | RS04496 |      |      |       |      |       |      | mltB | MEMBRANE-BOUND LYTIC MUREIN TRANSGLYCOSYLASE B                                  | III.B.3 |
| RSc0919 | RS04494 | 0.88 | 0.03 |       |      |       |      |      | COG0123, Deacetylase, including acetoin utilization protein                     | I       |
| RSc0920 | RS04495 |      |      |       |      |       |      |      | ABC TRANSPORTER ATP-BINDING PROTEIN                                             | IV.D    |
| RSc0921 | RS04492 |      |      |       |      | -1.72 | 0.00 |      | ABC TRANSPORTER TRANSMEMBRANE PROTEIN                                           | IV.D    |
| RSc0922 | RS04493 |      |      |       |      | -1.56 | 0.00 |      | ABC TRANSPORTER COG1464, ABC-type metal ion transport system, periplasmic cy    | IV.D.5  |
| RSc0923 | RS04491 |      |      |       |      | -0.56 | 0.00 |      | ELECTRON TRANSFER FLAVOPROTEIN (BETA-SUBUNIT)                                   | I.G.1   |
| RSc0924 | RS04490 |      |      | -0.49 | 0.01 |       |      | etfB | ELECTRON TRANSFER FLAVOPROTEIN (ALPHA-SUBUNIT)                                  | I.G.1   |
| RSc0925 | RS04489 |      |      |       |      |       |      | etfA | ELECTRON TRANSFER FLAVOPROTEIN (ALPHA-SUBUNIT)                                  | I.G.1   |
| RSc0926 | RS04488 |      |      |       |      |       |      | dadA | OXIDOREDUCTASE ACYL-CoA DEHYDROGENASE                                           | I       |
| RSc0927 | RS04487 |      |      | -0.68 | 0.00 |       |      | lrp  | SIGNAL PEPTIDE OXIDOREDUCTASE INNER MEMBRANE-BOUND D-AMINO ACID                 | I.I.3   |
| RSc0928 | RS04486 |      |      | -0.41 | 0.03 |       |      |      | TRANSCRIPTION REGULATOR LEUCINE-RESPONSIVE REGULATORY DNA-BINDING               | I.E.1   |
| RSc0929 | RS04485 |      |      | -0.54 | 0.00 |       |      |      | COG1533, DNA repair photolyase                                                  | II.B.8  |
| RSc0930 | RS04484 |      |      | -0.53 | 0.00 |       |      |      | TRANSMEMBRANE                                                                   | V.I.C   |
| RSc0931 | RS04483 |      |      | -1.15 | 0.00 |       |      |      | TRANSMEMBRANE                                                                   | V.I.D   |
| RSc0932 | RS04482 |      |      | -1.37 | 0.00 |       |      |      | SIGNAL PEPTIDE                                                                  | V.I.F   |
| RSc0933 | RS04481 |      |      | -0.44 | 0.02 |       |      | rpsP | OXIDOREDUCTASE COG2133, Glucose/sorbose dehydrogenase                           | III.C.2 |
| RSc0934 | RS04480 |      |      | -0.46 | 0.00 |       |      | rimM | 30S RIBOSOMAL SUBUNIT PROTEIN S16 (DNA-BINDING CATION-DEPENDENT                 | III.C.1 |
| RSc0935 | RS04479 |      |      | -0.45 | 0.03 | 0.78  | 0.00 | trmB | 16S RRNA PROCESSING PROTEIN                                                     | II.D.1  |
| RSc0936 | RS04478 |      |      | -0.43 | 0.01 |       |      | trmB | tRNA (GUANINE-N1)-METHYLTRANSFERASE                                             | III.C.1 |
| RSc0937 | RS04477 |      |      | -0.35 | 0.01 |       |      | rplS | 50S RIBOSOMAL SUBUNIT PROTEIN L19                                               | III.C.2 |
| RSc0938 | RS04475 |      |      | -0.51 | 0.00 |       |      |      | COG0494, NTP pyrophosphohydrolase including oxidative damage repair enzymes     | V.I.C   |
| RSc0939 | RS04472 |      |      | -0.47 | 0.05 | -0.97 | 0.01 |      | TRANSMEMBRANE COBALAMIN BIOSYNTHESIS COBD-RELATED PROTEIN                       | I.B.3   |
| RSc0940 | RS04469 |      |      | 0.46  | 0.03 |       |      |      | CONSERVED HYPOTHETICAL PROTEIN                                                  | V.I.C   |
| RSc0941 | RS04465 |      |      |       |      |       |      |      | COG1162, Predicted GTPase                                                       | V.I.C   |
| RSc0942 | RS04464 |      |      | -0.32 | 0.00 |       |      |      | TRANSMEMBRANE INTEGRAL MEMBRANE PROTEASE                                        | I.A.4   |
| RSc0943 | RS04462 |      |      |       |      |       |      | orn  | OLIGORIBONUCLEASE                                                               | II.A.2  |
| RSc0944 | RS04461 |      |      |       |      |       |      | mog  | MOLYBDOCHETALASE IN MOLYBDOPTERIN BIOSYNTHESIS                                  | I.B.12  |
| RSc0945 | RS04460 |      |      |       |      |       |      |      | CONSERVED HYPOTHETICAL PROTEIN                                                  | V.I.C   |
| RSc0946 | RS04449 |      |      | -0.44 | 0.01 |       |      | pmbA | PMB A PROTEIN (TLDE PROTEIN)                                                    | II.B.7  |
| RSc0947 | RS04447 |      |      | -0.46 | 0.01 | 0.69  | 0.02 | folA | OXIDOREDUCTASE DIHYDROFOLATE REDUCTASE                                          | I.F     |
| RSc0948 | RS04442 |      |      | -0.46 | 0.00 |       |      | thyA | THYMIDYLATE SYNTHASE (TRANSLATION REGULATION REPRESSOR RNA-BINDING              | I.F.2   |
| RSc0949 | RS04438 |      |      | -0.71 | 0.00 |       |      |      | AMINO-ACID DEHYDRATASE                                                          | I.A     |
| RSc0950 | RS04435 |      |      |       |      |       |      |      | TRANSMEMBRANE COG0861, Membrane protein TerC                                    | III.B.1 |
| RSc0951 | RS04428 |      |      |       |      |       |      |      | CONSERVED HYPOTHETICAL PROTEIN                                                  | V.I.C   |
| RSc0952 | RS04426 |      |      | -0.60 | 0.00 | 0.57  | 0.05 |      | HYPOTHETICAL PROTEIN                                                            | V.I.B   |
| RSc0953 | RS04413 |      |      | -1.26 | 0.00 | -1.56 | 0.00 |      | ATP-DEPENDENT RNA HELICASE                                                      | II.B.6  |
| RSc0954 | RS04412 |      |      |       |      | -1.04 | 0.01 |      | TRANSMEMBRANE                                                                   | V.I.D   |
| RSc0955 | RS04411 |      |      | -0.65 | 0.00 | -0.42 | 0.05 |      | HYPOTHETICAL PROTEIN                                                            | V.I.D   |
| RSc0956 | RS04410 |      |      | -0.58 | 0.02 | -1.16 | 0.04 |      | TRANSMEMBRANE                                                                   | V.I.D   |
| RSc0957 | RS04409 |      |      | -1.46 | 0.00 |       |      |      | HYPOTHETICAL PROTEIN                                                            | V.I.D   |
| RSc0958 | RS04407 |      |      | -1.41 | 0.00 |       |      |      | HYPOTHETICAL PROTEIN                                                            | V.I.D   |
| RSc0959 | RS04408 |      |      | -1.38 | 0.00 | -0.55 | 0.04 |      | VGR-RELATED PROTEIN                                                             | V.I.C   |
| RSc0960 | RS04406 |      |      | -1.29 | 0.00 |       |      |      | TRANSMEMBRANE                                                                   | V.I.C   |
| RSc0961 | RS04405 |      |      | -0.76 | 0.02 |       |      |      | CONSERVED HYPOTHETICAL PROTEIN                                                  | V.I.C   |
| RSc0962 | RS04402 |      |      | -1.40 | 0.00 | -1.79 | 0.00 |      | CONSERVED HYPOTHETICAL PROTEIN                                                  | V.I.C   |
| RSc0963 | RS04401 |      |      | -0.88 | 0.00 | -0.61 | 0.04 |      | TRANSCRIPTION REGULATOR BACTERIOPHAGE DNA-BINDING PROTEIN                       | V.D     |
| RSc0964 | RS04403 |      |      | -1.58 | 0.02 |       |      |      | HYPOTHETICAL PROTEIN                                                            | V.I.D   |
| RSc0965 | RS04404 |      |      | -0.70 | 0.00 | -1.42 | 0.01 |      | TRANSCRIPTION REGULATOR BACTERIOPHAGE TRANSCRIPTIONAL ACTIVATOR                 | V.D     |
| RSc0966 | RS04400 |      |      | -0.52 | 0.00 |       |      |      | HYPOTHETICAL PROTEIN                                                            | V.I.D   |
| RSc0967 | RS04399 |      |      |       |      |       |      |      | CONSERVED HYPOTHETICAL PROTEIN                                                  | V.I.C   |
| RSc0968 | RS04398 |      |      | -0.45 | 0.03 | -1.07 | 0.01 |      | CONSERVED HYPOTHETICAL PROTEIN                                                  | V.I.C   |
| RSc0969 | RS04395 |      |      |       |      |       |      |      | CP4-LIKE INTEGRASE                                                              | V.A     |
| RSc0970 | RS04396 |      |      |       |      |       |      |      | TRANSMEMBRANE                                                                   | V.I.C   |
| RSc0971 | RS04393 |      |      | -1.24 | 0.02 | 1.14  | 0.00 |      | SIGNAL PEPTIDE                                                                  | V.I.D   |
| RSc0972 | RS04392 |      |      |       |      | -0.47 | 0.01 |      | HYPOTHETICAL PROTEIN                                                            | V.I.B   |
| RSc0973 | RS04319 |      |      | -0.77 | 0.02 |       |      |      | CONSERVED HYPOTHETICAL PROTEIN                                                  | V.I.C   |
| RSc0974 | RS04318 |      |      | -1.67 | 0.00 | -1.81 | 0.00 |      | ABC TRANSPORTER AMINO-ACID-BINDING PERIPLASMIC PROTEIN (PBP)                    | IV.D.2  |
| RSc0975 | RS04385 |      |      |       |      |       |      |      | TRANSMEMBRANE                                                                   | V.I.D   |
| RSc0976 | RS04316 |      |      |       |      |       |      |      | ABC TRANSPORTER ATP-BINDING PROTEIN                                             | IV.D    |
| RSc0977 | RS04315 |      |      | -0.63 | 0.01 |       |      | parE | DNA TOPOISOMERASE IV (SUBUNIT B)                                                | II.B.8  |
| RSc0978 | RS04314 |      |      |       |      |       |      |      | SIGNAL PEPTIDE TRANSGLYCOSYLASE                                                 | V.I.B   |
| RSc0979 | RS04313 |      |      | 0.89  | 0.02 |       |      | parC | DNA TOPOISOMERASE IV (SUBUNIT A)                                                | II.B.8  |
| RSc0980 | RS04312 |      |      | 1.07  | 0.03 |       |      |      | TRANSMEMBRANE                                                                   | V.I.C   |
| RSc0981 | RS04311 |      |      | 1.51  | 0.01 |       |      |      | TRANSMEMBRANE                                                                   | V.I.C   |
| RSc0982 | RS04310 |      |      | -0.68 | 0.02 |       |      | ltdP | TRANSMEMBRANE L-LACTATE PERMEASE                                                | IV.D.3  |
| RSc0983 | RS04309 |      |      | -0.66 | 0.00 | -0.91 | 0.05 |      | TRANSMEMBRANE                                                                   | V.I.C   |
| RSc0984 | RS04308 |      |      | -0.58 | 0.00 |       |      |      | CONSERVED HYPOTHETICAL PROTEIN                                                  | V.I.C   |
| RSc0985 | RS04307 |      |      |       |      |       |      | gstE | GLUTATHIONE S-TRANSFERASE                                                       | II.B.7  |
| RSc0986 | RS04306 |      |      |       |      |       |      |      | TRANSCRIPTION REGULATOR COG1167, Transcriptional regulators containing a D      | VI.A    |
| RSc0987 | RS04305 |      |      | 0.39  | 0.02 |       |      |      | COG0251, Translation initiation inhibitor                                       | II.B.7  |
| RSc0988 | RS04304 |      |      | -0.45 | 0.00 |       |      |      | TRANSMEMBRANE                                                                   | V.I.C   |
| RSc0989 | RS04303 |      |      |       |      |       |      |      | COG2872, Predicted metal-dependent hydrolases related to alanyl-tRNA synthetase | II.I    |
| RSc0990 | RS04302 |      |      | -0.58 | 0.01 |       |      |      | TRANSCRIPTION REGULATOR                                                         | V.I.A   |
| RSc0991 | RS04301 |      |      |       |      | 0.62  | 0.00 | hptG | CHAPERONE (HEAT SHOCK PROTEIN HTPG)                                             | IV.B    |
| RSc0992 | RS04300 |      |      |       |      |       |      | mug  | COG3663, G:T/U mismatch-specific DNA glycosylase                                | II.B.8  |
| RSc0993 | RS04299 |      |      | -0.59 | 0.00 | -1.19 | 0.05 | gstF | TRANSMEMBRANE GLUTATHIONE S-TRANSFERASE WITH COG3832 (Uncharacter               | II.B.7  |
| RSc0994 | RS04298 |      |      |       |      |       |      |      | TRANSCRIPTION REGULATOR TRANSCRIPTIONAL REGULATORY DNA-BINDING                  | V.I.A   |
| RSc0995 | RS04297 |      |      | 0.63  | 0.03 |       |      |      | TRANSMEMBRANE                                                                   | V.I.C   |
| RSc0996 | RS04296 |      |      |       |      |       |      |      | COG0421, Spermidine synthase                                                    | I.F.15  |
| RSc0997 | RS04295 |      |      |       |      | 0.86  | 0.01 |      | CONSERVED HYPOTHETICAL PROTEIN                                                  | V.I.C   |
| RSc0998 | RS04294 |      |      | -0.34 | 0.00 |       |      |      | COG1670, Acetyltransferase                                                      | I       |
| RSc0999 | RS04293 |      |      |       |      |       |      |      | COG0714, MoxR-like ATPase                                                       | V.I.C   |
| RSc1000 | RS04292 |      |      | 0.15  | 0.01 | 0.56  | 0.00 |      | SIGNAL PEPTIDE PERIPLASMIC CYTOCHROME TYPE-C OXIDOREDUCTASE                     | I.G.1   |
| RSc1001 | RS04291 |      |      | 0.58  | 0.01 | 0.58  | 0.01 |      | SIGNAL PEPTIDE PERIPLASMIC CYTOCHROME TYPE-C OXIDOREDUCTASE                     | I.G.1   |
| RSc1002 | RS04290 |      |      |       |      |       |      |      | CONSERVED HYPOTHETICAL PROTEIN                                                  | V.I.C   |
| RSc1003 | RS04289 |      |      | 0.84  | 0.01 |       |      |      | TRANSMEMBRANE                                                                   | V.I.C   |
| RSc1004 | RS04288 |      |      | -0.43 | 0.03 | 0.86  | 0.00 |      | CARBOXYPEPTIDASE                                                                | II.A.4  |
| RSc1005 | RS04287 |      |      | 0.46  | 0.00 | -0.37 | 0.00 |      | COG0778, Nitroreductase                                                         | I       |
| RSc1006 | RS04286 |      |      | -0.41 | 0.00 | -0.44 | 0.05 | nth  | ENDONUCLEASE III                                                                | I.A.1   |
| RSc1007 | RS04285 |      |      |       |      |       |      |      | FERREDOXIN [4Fe-4S]                                                             | I.G.1   |
| RSc1008 | RS04284 |      |      |       |      | -0.69 | 0.01 |      | TRANSCRIPTION REGULATOR                                                         | V.I.A   |
| RSc1009 | RS04280 |      |      | -0.43 | 0.01 |       |      | phaZ | POLY(DL-3-HYDROXYBUTYRATE) DEPOLYMERASE                                         | I.A     |
| RSc1010 | RS04277 |      |      |       |      |       |      | tyrB | AROMATIC-AMINO-ACID AMINOTRANSFERASE                                            | II.A    |
| RSc1011 | RS04272 |      |      |       |      |       |      | uvrB | EXONUCLEASE ABC SUBUNIT B (SOS RESPONSE EXCISION NUCLEASE DNA                   | III.B.8 |
| RSc1012 | RS04269 |      |      |       |      | -0.73 | 0.03 |      | TRANSMEMBRANE SITE-SPECIFIC RECOMBINASE                                         | V.A     |
| RSc1013 | RS04266 |      |      |       |      | -3.20 | 0.00 |      | RIBOKINASE                                                                      | I       |
| RSc1014 | RS04264 |      |      | 0.83  | 0.03 |       |      |      | TRANSCRIPTION REGULATOR TRANSCRIPTIONAL REGULATORY DNA-BINDING                  | V.I.A   |
| RSc1015 | RS04262 |      |      | 0.54  | 0.00 | -0.54 | 0.01 |      | ABC TRANSPORTER RIBOSE ABC TRANSPORTER, PERMEASE PROTEIN                        | IV.D.3  |
| RSc1016 | RS04260 |      |      |       |      | -1.22 | 0.02 |      | ABC TRANSPORTER RIBOSE ABC TRANSPORTER, ATP-BINDING PROTEIN                     | IV.D.3  |
| RSc1017 | RS04257 |      |      | -0.27 | 0.03 | -0.56 | 0.02 |      | ABC TRANSPORTER RIBOSE ABC TRANSPORTER, PERIPLASMIC RIBOSE-BIND                 | IV.D.3  |
| RSc1018 | RS04257 |      |      | -0.53 | 0.00 | -1.08 | 0.00 |      | TRANSCRIPTION REGULATOR COG1959, Transcriptional regulator                      | V.I.A   |

|         |         |  |  |  |  |  |  |  |       |                                                                                                      |         |
|---------|---------|--|--|--|--|--|--|--|-------|------------------------------------------------------------------------------------------------------|---------|
| RSc1019 | RS04253 |  |  |  |  |  |  |  | iscS  | Cysteine sulfinate desulfinase / cysteine desulfurase                                                | I       |
| RSc1020 | RS04249 |  |  |  |  |  |  |  | iscU  | IRON-BINDING PROTEIN                                                                                 | I.H     |
| RSc1021 | RS04236 |  |  |  |  |  |  |  | iscA  | CONSERVED HYPOTHETICAL PROTEIN                                                                       | V.I.C   |
| RSc1022 | RS04245 |  |  |  |  |  |  |  |       | CONSERVED HYPOTHETICAL PROTEIN                                                                       | V.I.C   |
| RSc1023 | RS04234 |  |  |  |  |  |  |  | hscB  | CHAPERONE PROTEIN                                                                                    | IV.B    |
| RSc1024 | RS04231 |  |  |  |  |  |  |  | hscA  | CHAPERONE PROTEIN                                                                                    | IV.B    |
| RSc1025 | RS04229 |  |  |  |  |  |  |  | fdx   | FERREDOXIN [2FE-2S]                                                                                  | I.G.1   |
| RSc1026 | RS04227 |  |  |  |  |  |  |  |       | CONSERVED HYPOTHETICAL PROTEIN                                                                       | V.I.C   |
| RSc1027 | RS04225 |  |  |  |  |  |  |  |       | TRANSMEMBRANE                                                                                        | V.I.C   |
| RSc1028 | RS04223 |  |  |  |  |  |  |  | lysS  | LYSYL-TRNA SYNTHETASE                                                                                | I.I.D.1 |
| RSc1029 | RS04221 |  |  |  |  |  |  |  |       | OXIDOREDUCTASE SHORT-CHAIN ALCOHOL DEHYDROGENASE                                                     | I       |
| RSc1030 | RS05824 |  |  |  |  |  |  |  | prfB  | PEPTIDE CHAIN RELEASE FACTOR 2 (RF-2)                                                                | II.B.7  |
| RSc1031 | RS04219 |  |  |  |  |  |  |  | pncB  | NICOTINATE PHOSPHORIBOSYLTRANSFERASE (NAPRTASE)                                                      | I.B     |
| RSc1032 | RS04218 |  |  |  |  |  |  |  |       | TRANSMEMBRANE                                                                                        | V.I.C   |
| RSc1033 | RS04217 |  |  |  |  |  |  |  |       | TRANSMEMBRANE COG1055, Na <sup>+</sup> /H <sup>+</sup> antiporter NhaD and related arsenite permease | IV.D    |
| RSc1034 | RS04216 |  |  |  |  |  |  |  |       | OXIDOREDUCTASE COG1052, Lactate dehydrogenase and related dehydrogenases                             | IV      |
| RSc1035 | RS04215 |  |  |  |  |  |  |  |       | CONSERVED HYPOTHETICAL PROTEIN                                                                       | V.I.C   |
| RSc1036 | RS04214 |  |  |  |  |  |  |  |       | TRANSMEMBRANE                                                                                        | V.I.C   |
| RSc1037 | RS04213 |  |  |  |  |  |  |  | moeA1 | MOLYBDOPTERIN BIOSYNTHESIS MOEA PROTEIN                                                              | I.B.12  |
| RSc1038 | RS04212 |  |  |  |  |  |  |  | mobA  | MOLYBDOPTERIN-GUANINE DINUCLEOTIDE BIOSYNTHESIS PROTEIN A (PROT)                                     | I.B.12  |
| RSc1039 | RS04211 |  |  |  |  |  |  |  | moeA  | MOLYBDENUM COFACTOR BIOSYNTHESIS PROTEIN A                                                           | I.B.12  |
| RSc1040 | RS04210 |  |  |  |  |  |  |  | me    | RIBONUCLEASE E (RNASE E)                                                                             | III.A.2 |
| RSc1041 | RS04757 |  |  |  |  |  |  |  | riuC  | RIBOSOMAL LARGE SUBUNIT PSEUDOURIDINE SYNTHASE C                                                     | III.C.1 |
| RSc1042 | RS04208 |  |  |  |  |  |  |  |       | PHOSPHOGLYCOLATE PHOSPHATASE                                                                         | I.I.4   |
| RSc1043 | RS04207 |  |  |  |  |  |  |  |       | COG2146, Ferredoxin subunits of nitrite reductase and ring-hydroxylating dioxygenase                 | I       |
| RSc1044 | RS04206 |  |  |  |  |  |  |  |       | TRANSMEMBRANE PROTEASE                                                                               | II.A.4  |
| RSc1045 | RS04205 |  |  |  |  |  |  |  |       | TRANSMEMBRANE COG0313, Methyltransferase                                                             | V.I.C   |
| RSc1046 | RS04204 |  |  |  |  |  |  |  |       | COG0424, Nucleotide-binding protein implicated in inhibition of septum formation                     | IV.A    |
| RSc1047 | RS04197 |  |  |  |  |  |  |  |       | COG1399, Predicted metal-binding, possibly nucleic acid-binding protein                              | V.I.C   |
| RSc1048 | RS04194 |  |  |  |  |  |  |  | rpmF  | 50S RIBOSOMAL SUBUNIT PROTEIN L32                                                                    | III.C.2 |
| RSc1049 | RS04184 |  |  |  |  |  |  |  | plsX  | FATTY ACID/PHOSPHOLIPID BIOSYNTHESIS ENZYME                                                          | I       |
| RSc1050 | RS04180 |  |  |  |  |  |  |  | fabH  | 3-OXOACYL-[ACYL-CARRIER-PROTEIN] SYNTHASE III                                                        | I.B.1   |
| RSc1051 | RS04178 |  |  |  |  |  |  |  | fabD  | MALONYL COA-[ACYL-CARRIER-PROTEIN] TRANSACYLASE                                                      | I.B.1   |
| RSc1052 | RS04176 |  |  |  |  |  |  |  | fabG1 | OXIDOREDUCTASE 3-OXOACYL-[ACYL-CARRIER-PROTEIN] REDUCTASE                                            | I.B.1   |
| RSc1053 | RS04175 |  |  |  |  |  |  |  | acpP  | ACYL CARRIER PROTEIN                                                                                 | I.B.1   |
| RSc1054 | RS04165 |  |  |  |  |  |  |  | fabF1 | 3-OXOACYL-[ACYL-CARRIER-PROTEIN] SYNTHASE II                                                         | I.B.1   |
| RSc1055 | RS04163 |  |  |  |  |  |  |  | rpoE1 | TRANSCRIPTION REGULATOR RNA POLYMERASE SIGMA-E FACTOR (SIGMA-2)                                      | II.B.6  |
| RSc1056 | RS04161 |  |  |  |  |  |  |  | rseA  | TRANSCRIPTION REGULATOR TRANSMEMBRANE SIGMA-E FACTOR NEGATIVE                                        | II.B.6  |
| RSc1057 | RS04159 |  |  |  |  |  |  |  | rseB  | TRANSCRIPTION REGULATOR SIGMA-E FACTOR REGULATORY PROTEIN (NEG)                                      | II.B.6  |
| RSc1058 | RS04156 |  |  |  |  |  |  |  |       | SIGNAL PEPTIDE PERIPLASMIC PROTEASE                                                                  | II.A.4  |
| RSc1059 | RS04149 |  |  |  |  |  |  |  |       | CONSERVED HYPOTHETICAL PROTEIN                                                                       | V.I.C   |
| RSc1060 | RS04148 |  |  |  |  |  |  |  | lepA  | GTP-BINDING ELONGATION FACTOR                                                                        | II.B.7  |
| RSc1061 | RS04147 |  |  |  |  |  |  |  | lepB  | TRANSMEMBRANE SIGNAL PEPTIDASE I (SPASE I)                                                           | II.B.7  |
| RSc1062 | RS04145 |  |  |  |  |  |  |  |       | TRANSMEMBRANE                                                                                        | V.I.C   |
| RSc1063 | RS04144 |  |  |  |  |  |  |  | mc    | RIBONUCLEASE III (RNASE III)                                                                         | II.A.2  |
| RSc1064 | RS04143 |  |  |  |  |  |  |  | era   | GTP-BINDING PROTEIN                                                                                  | IV.A    |
| RSc1065 | RS04139 |  |  |  |  |  |  |  | recO  | DNA REPAIR PROTEIN RECO (RECOMBINATION PROTEIN O)                                                    | II.B.8  |
| RSc1066 | RS04138 |  |  |  |  |  |  |  | pdxJ  | PYRIDOXAL PHOSPHATE BIOSYNTHETIC PROTEIN                                                             | I.B     |
| RSc1067 | RS04136 |  |  |  |  |  |  |  | acpS  | HOLO-[ACYL-CARRIER-PROTEIN] SYNTHASE                                                                 | I.B.1   |
| RSc1068 | RS04135 |  |  |  |  |  |  |  |       | HEXOSAMINIDASE                                                                                       | II.I.4  |
| RSc1069 | RS04133 |  |  |  |  |  |  |  | efp   | ELONGATION FACTOR P                                                                                  | II.B.7  |
| RSc1070 | RS04117 |  |  |  |  |  |  |  |       | CONSERVED HYPOTHETICAL PROTEIN                                                                       | V.I.C   |
| RSc1071 | RS04116 |  |  |  |  |  |  |  | uvrC  | EXCINUCLEASE ABC SUBUNIT C (SOS RESPONSE DNA REPAIR PROTEIN)                                         | II.A.1  |
| RSc1072 | RS04115 |  |  |  |  |  |  |  | pgsA  | TRANSMEMBRANE CDP-DIACYLGLYCEROL--GLYCEROL-3-PHOSPHATE 3-PHO                                         | II.B.1  |
| RSc1073 | RS04114 |  |  |  |  |  |  |  |       | TRANSCRIPTION REGULATOR TWO-COMPONENT SYSTEM RESPONSE REGUL                                          | V.I.C   |
| RSc1074 | RS04113 |  |  |  |  |  |  |  |       | SIGNAL PEPTIDE                                                                                       | V.I.C   |
| RSc1075 | RS04112 |  |  |  |  |  |  |  |       | TRANSCRIPTION REGULATOR TWO-COMPONENT SYSTEM SENSOR HISTIDINE                                        | V.I.A   |
| RSc1076 | RS04111 |  |  |  |  |  |  |  |       | TRANSCRIPTION REGULATOR TWO-COMPONENT SYSTEM RESPONSE REGUL                                          | V.I.A   |
| RSc1077 | RS04110 |  |  |  |  |  |  |  |       | TRANSMEMBRANE                                                                                        | V.I.C   |
| RSc1078 | RS04109 |  |  |  |  |  |  |  |       | TRANSCRIPTION REGULATOR TRANSCRIPTIONAL REGULATORY DNA-BINDING                                       | V.I.A   |
| RSc1079 | RS04108 |  |  |  |  |  |  |  | gudD1 | GLUCARATE DEHYDRATASE                                                                                | I.I.4   |
| RSc1080 | RS04107 |  |  |  |  |  |  |  | exuT2 | TRANSMEMBRANE HEXURONATE TRANSPORTER                                                                 | IV.D    |
| RSc1081 | RS04106 |  |  |  |  |  |  |  |       | GLUCOSIDASE                                                                                          | I       |
| RSc1082 | RS04105 |  |  |  |  |  |  |  |       | OUTER MEMBRANE PORIN                                                                                 | III.B.2 |
| RSc1083 | RS04104 |  |  |  |  |  |  |  |       | COG2017, GALACTOSE MUTAROTASE AND RELATED ENZYMES                                                    | I       |
| RSc1084 | RS04103 |  |  |  |  |  |  |  |       | TRANSMEMBRANE COG3203, Outer membrane protein (porin)                                                | III.B.2 |
| RSc1085 | RS04102 |  |  |  |  |  |  |  | nagL  | GLUTATHIONE S-TRANSFERASE                                                                            | II      |
| RSc1086 | RS04101 |  |  |  |  |  |  |  | nagK  | ISOMERASE-DECARBOXYLASE HOMOLOG                                                                      | II      |
| RSc1087 | RS04100 |  |  |  |  |  |  |  | nagI  | OXIDOREDUCTASE GENTISATE 1,2-DIOXYGENASE                                                             | II      |
| RSc1088 | RS04099 |  |  |  |  |  |  |  | nagAb | OXIDOREDUCTASE Ferredoxin subunit of a ring-hydroxylating dioxygenase                                | II      |
| RSc1089 | RS04098 |  |  |  |  |  |  |  | nagH  | OXIDOREDUCTASE SALICYLATE-5-HYDROXYLASE SMALL OXYGENASE COMP                                         | II      |
| RSc1090 | RS04097 |  |  |  |  |  |  |  | nagG  | OXIDOREDUCTASE SALICYLATE-5-HYDROXYLASE LARGE OXYGENASE COMP                                         | II      |
| RSc1091 | RS04096 |  |  |  |  |  |  |  | nagAa | OXIDOREDUCTASE FERREDOXIN OXIDOREDUCTASE                                                             | II      |
| RSc1092 | RS04095 |  |  |  |  |  |  |  |       | TRANSCRIPTION REGULATOR TRANSCRIPTIONAL REGULATORY DNA-BINDING                                       | V.I.A   |
| RSc1093 | RS04094 |  |  |  |  |  |  |  | pcaK  | TRANSMEMBRANE 4-HYDROXYBENZOATE TRANSPORTER                                                          | IV.D.3  |
| RSc1094 | RS04084 |  |  |  |  |  |  |  |       | TRANSCRIPTION REGULATOR TRANSCRIPTIONAL REGULATORY DNA-BINDING                                       | V.I.A   |
| RSc1095 | RS04073 |  |  |  |  |  |  |  |       | TRANSMEMBRANE COG0679, Predicted permease                                                            | IV.D    |
| RSc1096 | RS04070 |  |  |  |  |  |  |  | aspC  | ASPARTATE AMINOTRANSFERASE                                                                           | I.A.15  |
| RSc1097 | RS04067 |  |  |  |  |  |  |  |       | TRANSCRIPTION REGULATOR                                                                              | V.I.A   |
| RSc1098 | RS04066 |  |  |  |  |  |  |  |       | TRANSCRIPTION REGULATOR TRANSCRIPTIONAL REGULATORY DNA-BINDING                                       | V.I.A   |
| RSc1099 | RS04061 |  |  |  |  |  |  |  | sda2a | INACTIVATED L-SERINE AMONYA-LYASE, L-SERINE DEHYDRATASE 2 (L-SERIN                                   | I.I.3   |
| RSc1100 | RS04059 |  |  |  |  |  |  |  | sda2b | INACTIVATED L-SERINE AMONYA-LYASE, L-SERINE DEHYDRATASE 2 (L-SERIN                                   | I.I.3   |
| RSc1101 | RS04056 |  |  |  |  |  |  |  | soxB2 | OXIDOREDUCTASE SARCOSINE OXIDASE (BETA SUBUNIT)                                                      | II      |
| RSc1102 | RS04055 |  |  |  |  |  |  |  | soxD2 | OXIDOREDUCTASE SARCOSINE OXIDASE (DELTA SUBUNIT)                                                     | II      |
| RSc1103 | RS04054 |  |  |  |  |  |  |  | soxA2 | OXIDOREDUCTASE SARCOSINE OXIDASE (ALPHA SUBUNIT)                                                     | II      |
| RSc1104 | RS04053 |  |  |  |  |  |  |  | soxG2 | OXIDOREDUCTASE SARCOSINE OXIDASE (GAMMA SUBUNIT)                                                     | II      |
| RSc1105 | RS04050 |  |  |  |  |  |  |  | folB2 | DIHYDRONEOPTERIN ALDOLASE                                                                            | I.B.14  |
| RSc1106 | RS04039 |  |  |  |  |  |  |  | purU3 | FORMYLTETRAHYDROFOLATE DEFORMYLASE                                                                   | I.D.2   |
| RSc1107 | RS04032 |  |  |  |  |  |  |  |       | TRANSMEMBRANE PSEUDOGENE (ABC TRANSPORTER N-TERMINAL FRAGME                                          | V.I.D   |
| RSc1108 | RS04035 |  |  |  |  |  |  |  |       | TRANSCRIPTION REGULATOR TRANSCRIPTIONAL REGULATORY DNA-BINDING                                       | V.I.A   |
| RSc1109 | RS04024 |  |  |  |  |  |  |  |       | PSEUDOGENE (DEHYDROGENASE FRAGMENT)                                                                  | V.I.D   |
| RSc1110 | RS04021 |  |  |  |  |  |  |  |       | TRANSCRIPTION REGULATOR TRANSCRIPTIONAL REGULATORY DNA-BINDING                                       | V.I.A   |
| RSc1111 | RS04015 |  |  |  |  |  |  |  |       | TRANSMEMBRANE                                                                                        | V.I.C   |
| RSc1112 | RS04011 |  |  |  |  |  |  |  |       | TRANSCRIPTION REGULATOR                                                                              | V.I.A   |
| RSc1113 | RS04007 |  |  |  |  |  |  |  |       | CONSERVED HYPOTHETICAL PROTEIN                                                                       | V.I.C   |
| RSc1114 | RS04006 |  |  |  |  |  |  |  | fdxA  | FERREDOXIN                                                                                           | I.G.1   |
| RSc1115 | RS05755 |  |  |  |  |  |  |  | recJ  | SINGLE-STRANDED-DNA-SPECIFIC EXONUCLEASE                                                             | II.A.1  |
| RSc1116 | RS05756 |  |  |  |  |  |  |  |       | SIGNAL PEPTIDE HYPOTHETICAL PROTEIN                                                                  | V.I.B   |
| RSc1117 | RS05757 |  |  |  |  |  |  |  |       | TRANSMEMBRANE LIPOPROTEIN RELEASING SYSTEM PROTEIN                                                   | IV.E.2  |
| RSc1118 | RS05758 |  |  |  |  |  |  |  | loID  | ABC TRANSPORTER LIPOPROTEIN RELEASING SYSTEM ATP-BINDING PROTEI                                      | IV.E.2  |
| RSc1119 | RS04635 |  |  |  |  |  |  |  |       | DEOXYRIBONUCLEASE                                                                                    | II.A.1  |
| RSc1120 | RS04634 |  |  |  |  |  |  |  |       | TRANSMEMBRANE COG2333, Predicted hydrolase (metallo-beta-lactamase superfa                           | II      |
| RSc1121 | RS04633 |  |  |  |  |  |  |  |       | CONSERVED HYPOTHETICAL PROTEIN                                                                       | V.I.C   |
| RSc1122 | RS04632 |  |  |  |  |  |  |  |       | CONSERVED HYPOTHETICAL PROTEIN                                                                       | V.I.C   |
| RSc1123 | RS04630 |  |  |  |  |  |  |  |       | COG1305, Transglutaminase-like enzyme, putative cysteine protease                                    | I       |
| RSc1124 | RS04629 |  |  |  |  |  |  |  |       | COG3484, Predicted proteasome-type protease                                                          | II.A.4  |
| RSc1125 | RS04628 |  |  |  |  |  |  |  |       | COG0596, Hydrolase or acyltransferase (alpha/beta hydrolase superfamily)                             | I       |
| RSc1126 | RS04627 |  |  |  |  |  |  |  | pyrG  | CTP SYNTHASE                                                                                         | I.D.1   |
| RSc1127 | RS04626 |  |  |  |  |  |  |  | kdsA  | 2-DEHYDRO-3-DEOXYPHOSPHOCTONATE ALDOLASE                                                             | III.A.1 |
| RSc1128 | RS04625 |  |  |  |  |  |  |  |       | CONSERVED HYPOTHETICAL PROTEIN                                                                       | V.I.C   |
| RSc1129 | RS04624 |  |  |  |  |  |  |  | eno   | ENOLASE (2-PHOSPHOGLYCERATE DEHYDRATASE)                                                             | I.H.8   |
| RSc1130 | RS04623 |  |  |  |  |  |  |  |       | TRANSMEMBRANE COG2919, Septum formation initiator                                                    | IV.A    |

|         |         |       |      |       |      |       |      |       |                                                                                      |         |
|---------|---------|-------|------|-------|------|-------|------|-------|--------------------------------------------------------------------------------------|---------|
| RSc1131 | RS04622 |       |      | -0.53 | 0.00 |       |      |       | TRANSMEMBRANE                                                                        | VI.C    |
| RSc1132 | RS04621 | 0.69  | 0.00 |       |      |       |      | -0.62 | REDOX REGULATED MOLECULAR CHAPERONE HEAT-SHOCK-LIKE PROTEIN                          | IV.B    |
| RSc1133 | RS04620 |       |      |       |      |       |      |       | COG0663, Carbonic anhydrase/acyltransferase                                          | I       |
| RSc1134 | RS04619 |       |      |       |      |       |      |       | CONSERVED HYPOTHETICAL PROTEIN                                                       | VI.C    |
| RSc1135 | RS04618 |       |      | -0.98 | 0.00 | -1.24 | 0.01 |       | COG0596, Hydrolase or acyltransferase (alpha/beta hydrolase superfamily)             | I       |
| RSc1136 | RS04617 |       |      |       |      | -0.83 | 0.00 |       | CONSERVED HYPOTHETICAL PROTEIN                                                       | VI.C    |
| RSc1137 | RS04616 |       |      | 0.76  | 0.02 |       |      |       | CONSERVED HYPOTHETICAL PROTEIN                                                       | VI.C    |
| RSc1138 | RS04615 |       |      | -0.33 | 0.01 | -0.61 | 0.04 |       | OXIDOREDUCTASE COG1748: Saccharopine dehydrogenase and related proteins              | I       |
| RSc1139 | RS04614 |       |      |       |      |       |      |       | OXIDOREDUCTASE THIOREDOXIN REDUCTASE                                                 | II.F.2  |
| RSc1140 | RS04613 |       |      | -0.54 | 0.00 |       |      |       | COG0613, Predicted metal-dependent phosphoesterase                                   | I       |
| RSc1141 | RS04612 |       |      |       |      |       |      |       | COG0009, Translation factor                                                          | II.B.7  |
| RSc1142 | RS04611 | 0.52  | 0.01 |       |      |       |      | -1.13 | TRANSMEMBRANE COG1994, Zn-dependent protease                                         | II.A.4  |
| RSc1143 | RS04610 | 0.63  | 0.03 | -0.30 | 0.00 |       |      |       | TRYPHOPHANYL-TRNA SYNTHETASE (SYW PROTEIN)                                           | II.D.1  |
| RSc1144 | RS04609 |       |      |       |      | -0.92 | 0.00 | -0.61 | CONSERVED HYPOTHETICAL PROTEIN                                                       | VI.C    |
| RSc1145 | RS04756 |       |      | -0.46 | 0.00 |       |      | -0.19 | CONSERVED HYPOTHETICAL PROTEIN                                                       | VI.C    |
| RSc1146 | RS04607 |       |      | -0.48 | 0.04 | -0.64 | 0.03 | -0.74 | DIHYDRODIPICOLINATE SYNTHASE                                                         | II.A.13 |
| RSc1147 | RS04606 |       |      | -0.49 | 0.01 |       |      | -0.78 | TRANSMEMBRANE                                                                        | VI.C    |
| RSc1148 | RS04604 | 0.66  | 0.01 |       |      |       |      |       | COG1235, Metal-dependent hydrolase of the beta-lactamase superfamily I               | II      |
| RSc1149 | RS04602 |       |      | -0.64 | 0.00 | -0.59 | 0.01 |       | CONSERVED HYPOTHETICAL PROTEIN                                                       | VI.C    |
| RSc1150 | RS04601 |       |      |       |      |       |      |       | FKBP-TYPE PEPTIDYL-PROLYL CIS- TRANS ISOMERASE (ROTAMASE)                            | IV.B    |
| RSc1151 | RS04600 |       |      |       |      | 0.42  | 0.04 |       | TRANSMEMBRANE                                                                        | VI.C    |
| RSc1152 | RS04599 |       |      |       |      |       |      |       | DNA MISMATCH REPAIR PROTEIN                                                          | II.B.8  |
| RSc1153 | RS04598 |       |      |       |      |       |      |       | TRANSCRIPTION REGULATOR                                                              | VI.A    |
| RSc1154 | RS04597 |       |      | -0.44 | 0.05 |       |      |       | TRANSMEMBRANE TRANSMEMBRANE EFFLUX PROTEIN                                           | IV.D    |
| RSc1155 | RS04596 | 0.33  | 0.05 |       |      |       |      |       | OXIDOREDUCTASE COG0656, Aldo/keto reductases, related to diketoglucuronate reductase | I       |
| RSc1156 | RS04595 |       |      |       |      |       |      |       | TRANSMEMBRANE METHYL-ACCEPTING CHEMOTAXIS TRANSDUCER PROTEIN IV.C                    | IV.C    |
| RSc1157 | RS04594 | -0.55 | 0.01 | 1.25  | 0.00 |       |      |       | TRANSMEMBRANE METHYL-ACCEPTING CHEMOTAXIS TRANSDUCER PROTEIN IV.C                    | IV.C    |
| RSc1158 | RS04593 |       |      | -1.93 | 0.00 |       |      |       | CONSERVED HYPOTHETICAL PROTEIN                                                       | VI.C    |
| RSc1159 | RS04592 |       |      |       |      | -0.83 | 0.01 |       | COG0518, GMP synthase - Glutamine amidotransferase domain                            | II.D    |
| RSc1160 | RS04755 |       |      | -0.61 | 0.03 | -0.28 | 0.05 |       | TRANSCRIPTION REGULATOR                                                              | VI.A    |
| RSc1161 | RS04590 |       |      |       |      | -0.56 | 0.00 |       | INHOSITOL MONOPHOSPHATASE (EXTRAGENIC SUPPRESSOR PROTEIN)                            | II.B.6  |
| RSc1162 | RS04589 |       |      |       |      |       |      |       | TRNA/RRNA METHYLTRANSFERASE                                                          | II.B.6  |
| RSc1163 | RS04585 |       |      |       |      |       |      |       | O-ACETYL SERINE SYNTHASE (SERINE ACETYLTRANSFERASE)                                  | II.A.9  |
| RSc1164 | RS04581 | 0.45  | 0.01 |       |      | -0.92 | 0.00 |       | UDP-2,3-DIACYLGLUCOSAMINE HYDROLASE                                                  | II.B.2  |
| RSc1165 | RS04579 | 0.35  | 0.02 |       |      |       |      |       | PEPTIDYL-PROLYL CIS-TRANS ISOMERASE B (PPIASE B) (ROTAMASE B)(CYBP)                  | IV.B    |
| RSc1166 | RS04578 |       |      | -0.50 | 0.00 | 0.39  | 0.02 |       | SIGNAL PEPTIDE PEPTIDYL-PROLYL CIS-TRANS ISOMERASE A (PPIASE A)(ROTIV)               | II.B    |
| RSc1167 | RS04577 |       |      |       |      | 0.53  | 0.04 |       | SIGNAL PEPTIDE TPR DOMAIN PROTEIN                                                    | VI.B    |
| RSc1168 | RS04576 |       |      |       |      |       |      |       | CYSTEINYL-TRNA SYNTHETASE (SYC PROTEIN)                                              | II.D.1  |
| RSc1169 | RS04560 | 0.48  | 0.00 |       |      | 0.69  | 0.01 |       | COG0122, 3-methyladenine DNA glycosylase/8-oxoguanine DNA glycosylase                | II.B.8  |
| RSc1170 | RS04559 |       |      | -0.68 | 0.04 |       |      |       | ACETYL-COENZYME A CARBOXYLASE CARBOXYL TRANSFERASE (ALPHA SUB)                       | II.B.1  |
| RSc1171 | RS04558 | 0.72  | 0.00 | -0.31 | 0.02 | -0.37 | 0.05 | -2.51 | CELL CYCLE PROTEIN                                                                   | IV.A    |
| RSc1172 | RS04754 |       |      |       |      |       |      | 0.89  | ASPARTATE KINASE                                                                     | II.A.13 |
| RSc1173 | RS04555 |       |      |       |      |       |      |       | OXIDOREDUCTASE ENOYL-[ACYL-CARRIER-PROTEIN] REDUCTASE [NADH]                         | II.B.1  |
| RSc1174 | RS04551 |       |      | -0.50 | 0.00 |       |      |       | ABC TRANSPORTER SUBSTRATE-BINDING PERIPLASMIC PROTEIN (PBP)                          | IV.D    |
| RSc1175 | RS04550 |       |      |       |      |       |      | 0.49  | ABC TRANSPORTER TRANSMEMBRANE PROTEIN                                                | IV.D    |
| RSc1176 | RS04549 | 0.63  | 0.03 |       |      |       |      |       | ABC TRANSPORTER TRANSMEMBRANE PROTEIN                                                | IV.D    |
| RSc1177 | RS04548 |       |      | -0.51 | 0.00 |       |      | -0.44 | ABC TRANSPORTER ATP-BINDING PROTEIN                                                  | IV.D    |
| RSc1178 | RS04543 | 0.51  | 0.02 |       |      |       |      |       | TRANSMEMBRANE COG0791, Cell wall-associated hydrolase                                | II.B    |
| RSc1179 | RS04541 |       |      | -0.37 | 0.04 |       |      | -0.86 | TRANSMEMBRANE COG1752, Esterase of the alpha-beta hydrolase superfamily              | I       |
| RSc1180 | RS05712 |       |      |       |      | -0.56 | 0.02 |       | GLUTAMATE-IRNA SYNTHETASE (CATALYTIC SUBUNIT)(SYE PROTEIN)                           | II.D.1  |
| RSc1181 | RS05713 |       |      | -0.38 | 0.00 |       |      |       | TRANSMEMBRANE COG0534, Na <sup>+</sup> -driven multidrug efflux pump                 | IV.D    |
| RSc1182 | RS05714 |       |      | -0.41 | 0.05 |       |      | -0.95 | TRANSMEMBRANE COG1807, 4-amino-4-deoxy-L-arabinose transferase and related           | II.B    |
| RSc1183 | RS05715 |       |      | -0.44 | 0.02 |       |      |       | 50S RIBOSOMAL SUBUNIT PROTEIN L31                                                    | III.C.2 |
| RSc1184 | RS05716 | 0.65  | 0.03 | -0.78 | 0.00 |       |      |       | SIGNAL PEPTIDE                                                                       | VI.D    |
| RSc1185 | RS05717 |       |      | -0.93 | 0.00 |       |      | 1.21  | CONSERVED HYPOTHETICAL PROTEIN                                                       | VI.C    |
| RSc1186 | RS05718 |       |      | -0.80 | 0.00 |       |      |       | TRANSCRIPTION REGULATOR                                                              | VI.A    |
| RSc1187 | RS05719 | 0.60  | 0.00 | -0.27 | 0.02 |       |      | -0.84 | TRANSCRIPTION REGULATOR SIGMA-54 INTERACTING PROTEIN                                 | VI.A    |
| RSc1188 | RS05720 | 0.47  | 0.05 | -0.56 | 0.00 |       |      |       | TRANSCRIPTION TERMINATION FACTOR RHO (HELICASE)                                      | II.B.6  |
| RSc1189 | RS05721 |       |      |       |      |       |      |       | THIOREDOXIN 1 (REDOX FACTOR)                                                         | II.B.6  |
| RSc1190 | RS05722 | 1.48  | 0.03 |       |      |       |      |       | COG3893, Inactivated superfamily I helicase AND COG2887, RecB family exonuclease     | II.B.8  |
| RSc1191 | RS05723 | 0.56  | 0.01 |       |      |       |      |       | ATP-dependent exoDNase (exonuclease V) beta subunit (contains helicase and exon)     | II.B.8  |
| RSc1192 | RS05724 | 0.76  | 0.03 |       |      |       |      |       | DNA POLYMERASE III (SUBUNITS TAU AND GAMMA)                                          | II.B.8  |
| RSc1193 | RS05725 | 0.53  | 0.01 |       |      | -0.50 | 0.05 |       | CONSERVED HYPOTHETICAL PROTEIN                                                       | VI.C    |
| RSc1194 | RS05726 | 0.48  | 0.02 | -0.11 | 0.04 | 0.42  | 0.05 |       | HYPOTHETICAL PROTEIN                                                                 | VI.D    |
| RSc1195 | RS05727 |       |      |       |      |       |      |       | DNA REPAIR DNA RECOMBINATION ZINC-FINGER PROTEIN RECR                                | II.B.8  |
| RSc1196 | RS05728 |       |      |       |      | -0.46 | 0.04 |       | CONSERVED HYPOTHETICAL PROTEIN                                                       | VI.C    |
| RSc1197 | RS05729 |       |      |       |      |       |      | 3.06  | TRANSCRIPTION REGULATOR DNA-BINDING TRANSCRIPTIONAL REGULATORY                       | VI.A    |
| RSc1198 | RS05730 | -0.35 | 0.02 |       |      |       |      |       | OXIDOREDUCTASE COG1804, Acyl-CoA transferases/carnitine dehydratase                  | I       |
| RSc1199 | RS02665 | 0.64  | 0.00 | -0.44 | 0.04 | 0.91  | 0.01 |       | ABC TRANSPORTER COG0715, ABC-type nitrate/sulfonate/bicarbonate transport sys        | IV.D    |
| RSc1200 | RS02669 | 0.65  | 0.01 |       |      |       |      |       | ABC TRANSPORTER COG1116, ABC-type nitrate/sulfonate/bicarbonate transport sys        | IV.D    |
| RSc1201 | RS02672 |       |      | -0.20 | 0.05 |       |      |       | ABC TRANSPORTER COG0600, ABC-type nitrate/sulfonate/bicarbonate transport sys        | IV.D    |
| RSc1202 | RS02674 | -1.58 | 0.04 | -1.55 | 0.00 | -1.85 | 0.00 |       | TRANSCRIPTION REGULATOR                                                              | VI.A    |
| RSc1203 | RS02677 | -1.11 | 0.04 | -1.11 | 0.00 |       |      |       | OXIDOREDUCTASE FLAVOPROTEIN NADH-DEPENDENT                                           | II.F    |
| RSc1204 | RS02681 |       |      | -1.14 | 0.00 |       |      |       | OXIDOREDUCTASE                                                                       | I       |
| RSc1205 | RS02685 | 0.37  | 0.05 | -0.53 | 0.00 | 0.42  | 0.04 |       | STATIONARY-PHASE SURVIVAL PROTEIN                                                    | IV.G    |
| RSc1206 | RS02686 |       |      | -0.62 | 0.00 | -0.92 | 0.03 | -0.85 | COG2518, Protein-L-isoaspartate carboxylmethyltransferase                            | II.B.7  |
| RSc1207 | RS02688 |       |      | -0.31 | 0.04 |       |      |       | LIPOPROTEIN                                                                          | VI.C    |
| RSc1208 | RS02691 |       |      | -0.57 | 0.01 |       |      |       | TRANSCRIPTION REGULATOR RNA POLYMERASE SIGMA S (SIGMA-38) FACTOR                     | II.E.1  |
| RSc1209 | RS02696 | 0.91  | 0.01 |       |      |       |      |       | COG3568, Metal-dependent hydrolase                                                   | II      |
| RSc1210 | RS02699 |       |      |       |      |       |      |       | RNA METHYLTRANSFERASE                                                                | II.B.6  |
| RSc1211 | RS02703 | 0.61  | 0.01 |       |      | 0.51  | 0.03 | -0.45 | TRANSMEMBRANE                                                                        | VI.C    |
| RSc1212 | RS02704 | 0.42  | 0.03 |       |      |       |      | -0.93 | NUCLEOSIDE-DIPHOSPHATE KINASE PROTEIN                                                | II.D.2  |
| RSc1213 | RS02705 | 0.34  | 0.04 | -0.41 | 0.00 |       |      | -0.32 | COG0820, Fe-S-cluster redox enzyme                                                   | I       |
| RSc1214 | RS02709 |       |      | -0.34 | 0.00 |       |      |       | TYPE 4 FIMBRIAL BIOGENESIS PROTEIN                                                   | II.A.2  |
| RSc1215 | RS02710 |       |      | -0.47 | 0.00 |       |      |       | TRANSMEMBRANE                                                                        | VI.C    |
| RSc1216 | RS02790 | 0.51  | 0.01 |       |      |       |      | -0.63 | COG0821, GcpE enzyme involved in the deoxyxylulose pathway of isoprenoid biosyn      | I       |
| RSc1217 | RS02712 |       |      |       |      |       |      |       | HISTIDINE-TRNA SYNTHETASE                                                            | II.D.1  |
| RSc1218 | RS02713 | 0.48  | 0.02 | -0.28 | 0.01 |       |      | -0.52 | TRANSMEMBRANE                                                                        | VI.C    |
| RSc1219 | RS02721 |       |      |       |      |       |      |       | TRANSMEMBRANE COG1520, FOG: WD40-like repeat                                         | VI.C    |
| RSc1220 | RS02722 |       |      | -0.23 | 0.04 | -0.75 | 0.02 |       | COG1160, GTPase                                                                      | VI.C    |
| RSc1221 | RS02723 | 0.51  | 0.03 | -0.56 | 0.00 |       |      | -0.96 | HOST FACTOR-I PROTEIN                                                                | VI.D    |
| RSc1222 | RS02724 |       |      | -0.68 | 0.00 |       |      |       | COG2262, GTPase                                                                      | VI.C    |
| RSc1223 | RS02730 | 0.51  | 0.01 |       |      |       |      | -0.41 | TRANSMEMBRANE COG0330, Membrane protease subunits, stomatin/prohibitin hor           | II.B.7  |
| RSc1224 | RS02731 |       |      | -0.48 | 0.00 |       |      |       | TRANSMEMBRANE SERINE PROTEASE                                                        | VI.A    |
| RSc1225 | RS02732 | 0.63  | 0.02 |       |      |       |      |       | TRANSMEMBRANE                                                                        | VI.C    |
| RSc1226 | RS02733 |       |      |       |      | -0.41 | 0.01 |       | COG3705, ATP phosphoribosyltransferase involved in histidine biosynthesis            | II.A.4  |
| RSc1227 | RS02734 |       |      |       |      |       |      |       | ADENYLOSUCCINATE SYNTHETASE                                                          | II.D.2  |
| RSc1228 | RS02735 | 0.66  | 0.02 |       |      |       |      | -0.66 | NUCLEOTIDE PHOSPHORIBOSYLTRANSFERASE                                                 | II.F.9  |
| RSc1229 | RS02736 | 0.51  | 0.02 |       |      |       |      |       | EXORIBONUCLEASE RNase R (VACB PROTEIN)                                               | II.A.2  |
| RSc1230 | RS02737 |       |      |       |      |       |      |       | TRNA/RRNA METHYLTRANSFERASE PROTEIN                                                  | II.B.6  |
| RSc1231 | RS02738 |       |      |       |      | 1.48  | 0.00 |       | COG0846, NAD-dependent protein deacetylase                                           | II.B.6  |
| RSc1232 | RS02791 | 0.91  | 0.01 | -0.34 | 0.04 |       |      | -0.95 | TRANSALDOLASE                                                                        | II.F.19 |
| RSc1233 | RS02740 |       |      |       |      |       |      |       | RIBOSE 5-PHOSPHATE ISOMERASE                                                         | II.F.19 |
| RSc1234 | RS02741 |       |      | 0.35  | 0.00 |       |      |       | TRANSMEMBRANE COG1953, Cytosine/uracil/thiamine/allantoin permease                   | IV.D    |
| RSc1235 | RS02742 |       |      |       |      | -1.34 | 0.01 | -1.13 | TRANSMEMBRANE METHYL-ACCEPTING CHEMOTAXIS PROTEIN                                    | IV.C    |
| RSc1236 | RS02744 |       |      |       |      |       |      |       | CONSERVED HYPOTHETICAL PROTEIN                                                       | VI.C    |
| RSc1237 | RS02745 |       |      | -0.99 | 0.02 |       |      |       | OUTER MEMBRANE PROTEIN (PORIN)                                                       | III.B.2 |
| RSc1238 | RS02746 |       |      | -0.43 | 0.04 |       |      |       | MYO-INOSITOL CATABOLISM PROTEIN                                                      | II.A    |
| RSc1239 | RS02747 |       |      |       |      |       |      |       | MYO-INOSITOL CATABOLISM PROTEIN                                                      | II.A    |
| RSc1240 | RS02748 |       |      |       |      |       |      |       | ACETOLACTATE SYNTHASE                                                                | II.A    |
| RSc1241 | RS02749 |       |      |       |      |       |      |       | TRANSFERASE KINASE                                                                   | II.A    |
| RSc1242 | RS02750 |       |      |       |      |       |      |       | SIGNAL PEPTIDE RHIZOPINE-BINDING PROTEIN PRECURSOR                                   | II.A    |
|         |         |       |      |       |      |       |      |       | ABC TRANSPORTER SUGAR ATP-BINDING PROTEIN                                            | IV.D.3  |





|         |         |       |      |       |      |      |      |      |      |                                                                               |          |
|---------|---------|-------|------|-------|------|------|------|------|------|-------------------------------------------------------------------------------|----------|
| RSc1356 | RS04638 |       |      |       |      |      |      |      | ripG | TYPE III EFFECTOR PROTEIN GALA6                                               | V.I.E    |
| RSc1357 | RS04639 | -3.02 | 0.00 | -4.22 | 0.00 | 4.62 | 0.00 | 4.71 | 0.00 | LRR-GALA FAMILY TYPE III EFFECTOR PROTEIN (GALA 7)                            | V.I.C    |
| RSc1358 | RS04640 |       |      |       |      |      |      |      | aceA | ISOCITRATE LYASE                                                              | I.F.17   |
| RSc1359 | RS04641 | 0.64  | 0.05 | -0.33 | 0.05 | 0.49 | 0.00 | 0.78 | 0.04 | COG589, Universal stress protein UspA and related nucleotide-binding proteins | I.V.G    |
| RSc1360 | RS04642 |       |      |       |      |      |      |      |      | TRANSCRIPTION REGULATOR                                                       | V.I.A    |
| RSc1361 | RS04643 |       |      |       |      |      |      |      |      | TRANSMEMBRANE                                                                 | V.I.D    |
| RSc1362 | RS04644 |       |      |       |      |      |      |      |      | COG1011, Predicted hydrolase                                                  | I.I      |
| RSc1363 | RS04645 |       |      |       |      |      |      |      |      | MALATE SYNTHASE A (MSA OR MASY PROTEIN)                                       | I.F.17   |
| RSc1364 | RS04646 |       |      |       |      |      |      |      |      | CONSERVED HYPOTHETICAL PROTEIN                                                | V.I.C    |
| RSc1365 | RS04647 |       |      |       |      |      |      |      |      | TRANSMEMBRANE MULTIDRUG RESISTANCE-LIKE EFFLUX PROTEIN                        | I.V.D.7  |
| RSc1366 | RS04648 |       |      |       |      |      |      |      |      | ACYL-COA-BINDING PROTEIN                                                      | I.V.D.7  |
| RSc1367 | RS04650 |       |      |       |      |      |      |      |      | TRANSMEMBRANE COG1214, Inactive homolog of metal-dependent proteases, puta    | V.I.C    |
| RSc1368 | RS04651 |       |      |       |      |      |      |      |      | ACETYLTRANSFERASE                                                             | I        |
| RSc1369 | RS04652 |       |      |       |      |      |      |      |      | COG1573, Uracil-DNA glycosylase                                               | I.I.B.8  |
| RSc1370 | RS04653 |       |      |       |      |      |      |      |      | TRANSMEMBRANE                                                                 | V.I.C    |
| RSc1371 | RS04748 |       |      |       |      |      |      |      |      | ALANINE RACEMASE                                                              | I.A.3    |
| RSc1372 | RS04749 |       |      |       |      |      |      |      |      | ATP-DEPENDENT PROTEASE, DNA REPAIR (ATP-BINDING DNA-BINDING) PROTI            | I.II.A.4 |
| RSc1373 | RS04656 |       |      |       |      |      |      |      |      | OXIDOREDUCTASE TRANSMEMBRANE DISULFIDE BOND FORMATION PROTI                   | I.II.B.7 |
| RSc1374 | RS04657 |       |      |       |      |      |      |      |      | CONSERVED HYPOTHETICAL PROTEIN                                                | V.I.C    |
| RSc1375 | RS04658 |       |      |       |      |      |      |      |      | TRANSMEMBRANE COG1804, Predicted acyl-CoA transferases/carnitine dehydratas   | I        |
| RSc1376 | RS04659 |       |      |       |      |      |      |      |      | ABC TRANSPORTER ATP-BINDING PROTEIN                                           | I.V.D    |
| RSc1377 | RS04660 |       |      |       |      |      |      |      |      | TRANSCRIPTION REGULATOR                                                       | V.I.A    |
| RSc1378 | RS04661 |       |      |       |      |      |      |      |      | L-ASPARAGINASE PRECURSOR                                                      | I        |
| RSc1379 | RS04662 |       |      |       |      |      |      |      |      | ABC TRANSPORTER ATP-BINDING PROTEIN                                           | I.V.D    |
| RSc1380 | RS04663 |       |      |       |      |      |      |      |      | ABC TRANSPORTER SUBSTATE-BINDING PERIPLASMIC PROTEIN (PBP)                    | I.V.D    |
| RSc1381 | RS04750 |       |      |       |      |      |      |      |      | ABC TRANSPORTER TRANSMEMBRANE PROTEIN                                         | I.V.D    |
| RSc1382 | RS04665 |       |      |       |      |      |      |      |      | ABC TRANSPORTER TRANSMEMBRANE PROTEIN                                         | I.V.D    |
| RSc1383 | RS04666 |       |      |       |      |      |      |      |      | COG3191, L-aminopeptidase/D-esterase                                          | I.II.A.4 |
| RSc1384 | RS04667 |       |      |       |      |      |      |      |      | COG2362, D-aminopeptidase                                                     | I.II.A.4 |
| RSc1385 | RS04668 |       |      |       |      |      |      |      |      | TRANSMEMBRANE LIPOPROTEIN                                                     | V.I.D    |
| RSc1386 | RS04669 |       |      |       |      |      |      |      |      | CONSERVED HYPOTHETICAL PROTEIN                                                | V.I.C    |
| RSc1387 | RS04670 |       |      |       |      |      |      |      |      | GTP CYCLOHYDROLASE I                                                          | I.B.14   |
| RSc1388 | RS04671 |       |      |       |      |      |      |      |      | METHYLASE/METHYLTRANSFERASE                                                   | I.II.B.8 |
| RSc1389 | RS04672 |       |      |       |      |      |      |      |      | COG1437, Adenylate cyclase, class 2 (thermophilic)                            | I        |
| RSc1390 | RS04673 |       |      |       |      |      |      |      |      | SUCCINYL-DIAMINOPIMELATE DESUCCINYLASE                                        | I.A.13   |
| RSc1391 | RS04674 |       |      |       |      |      |      |      |      | COG1393, Arsenate reductase and related proteins                              | I        |
| RSc1392 | RS04675 |       |      |       |      |      |      |      |      | TRANSMEMBRANE                                                                 | V.I.C    |
| RSc1393 | RS04676 |       |      |       |      |      |      |      |      | 2,3,4,5-TETRAHYDROPYRIDINE-2-CARBOXYLATE N-SUCCINYLTRANSFERASE                | I.A.13   |
| RSc1394 | RS04677 |       |      |       |      |      |      |      |      | SUCCINYLDIAMINOPIMELATE AMINOTRANSFERASE                                      | I.A.13   |
| RSc1395 | RS05759 |       |      |       |      |      |      |      |      | TRANSMEMBRANE                                                                 | V.I.C    |
| RSc1396 | RS05760 |       |      |       |      |      |      |      |      | TRANSMEMBRANE COG5096, Predicted hydrolases or acyltransferases (alpha/beta)  | I        |
| RSc1397 | RS05762 |       |      |       |      |      |      |      |      | TRANSMEMBRANE                                                                 | V.I.C    |
| RSc1398 | RS05294 |       |      |       |      |      |      |      |      | DNA LIGASE (POLYDEOXYRIBONUCLEOTIDE SYNTHASE [NAD+])                          | I.II.B.8 |
| RSc1399 | RS05293 |       |      |       |      |      |      |      |      | POLYPEPTIDE DEFORMYLASE                                                       | I.II.B.7 |
| RSc1400 | RS05292 |       |      |       |      |      |      |      |      | TRANSMEMBRANE                                                                 | V.I.C    |
| RSc1401 | RS05291 |       |      |       |      |      |      |      |      | HYPOTHETICAL PROTEIN                                                          | V.I.B    |
| RSc1402 | RS05290 |       |      |       |      |      |      |      |      | PROTEIN-PII URIDYLTRANSFERASE                                                 | I.A.18   |
| RSc1403 | RS05289 |       |      |       |      |      |      |      |      | METHIONINE AMINOPEPTIDASE                                                     | I.II.B.7 |
| RSc1404 | RS05288 |       |      |       |      |      |      |      |      | 30S RIBOSOMAL PROTEIN S2                                                      | I.II.C.2 |
| RSc1405 | RS05287 |       |      |       |      |      |      |      |      | ELONGATION FACTOR TS (EF-TS)                                                  | I.II.B.7 |
| RSc1406 | RS05286 |       |      |       |      |      |      |      |      | URIDYLATE KINASE                                                              | I.F.9    |
| RSc1407 | RS05285 |       |      |       |      |      |      |      |      | RIBOSOME RECYCLING FACTOR (RIBOSOME RELEASING FACTOR)                         | I.II.B.7 |
| RSc1408 | RS05284 |       |      |       |      |      |      |      |      | UNDECAPRENYL PYROPHOSPHATE SYNTHETASE                                         | I.II.B.3 |
| RSc1409 | RS05283 |       |      |       |      |      |      |      |      | TRANSMEMBRANE PHOSPHATIDATE CYTIDYLTRANSFERASE                                | I.II.1   |
| RSc1410 | RS05282 |       |      |       |      |      |      |      |      | OXIDOREDUCTASE 1-DEOXY-D-XYLULOSE 5-PHOSPHATE REDUCTOISOMERA                  | I.II.B.5 |
| RSc1411 | RS05281 |       |      |       |      |      |      |      |      | TRANSMEMBRANE COG0750, Predicted membrane-associated Zn-dependent prote       | I.II.A.4 |
| RSc1412 | RS05280 |       |      |       |      |      |      |      |      | SIGNAL PEPTIDE COG4775, Outer membrane protein                                | I.II.B.2 |
| RSc1413 | RS05279 |       |      |       |      |      |      |      |      | TRANSMEMBRANE COG2825, OUTER MEMBRANE PROTEIN                                 | I.II.B.2 |
| RSc1414 | RS05278 |       |      |       |      |      |      |      |      | UDP-3-O-3-HYDROXYMYRISTOYL GLUCOSAMINE N-ACYLTRANSFERASE                      | I.II.A.1 |
| RSc1415 | RS05277 |       |      |       |      |      |      |      |      | 3R-HYDROXYMYRISTOYL-ACYL CARRIER PROTEIN DEHYDRATASE                          | I.II.A.1 |
| RSc1416 | RS05276 |       |      |       |      |      |      |      |      | ACYL-ACYL-CARRIER-PROTEIN-UDP-N-ACETYLGUCOSAMINE O-ACYLTRANS                  | I.II.A.1 |
| RSc1417 | RS05275 |       |      |       |      |      |      |      |      | LIPID-A-DISACCHARIDE SYNTHASE                                                 | I.II.A.1 |
| RSc1418 | RS05274 |       |      |       |      |      |      |      |      | RIBONUCLEASE HII                                                              | I.II.A.2 |
| RSc1419 | RS05273 |       |      |       |      |      |      |      |      | COG566, rRNA methylases                                                       | I.II.C.1 |
| RSc1420 | RS05272 |       |      |       |      |      |      |      |      | ATP-BINDING PROTEIN                                                           | V.I.C    |
| RSc1421 | RS05271 |       |      |       |      |      |      |      |      | PHOSPHOENOLPYRUVATE SYNTHASE                                                  | I.F.13   |
| RSc1422 | RS05270 |       |      |       |      |      |      |      |      | TRANSMEMBRANE COG1585, Membrane protein implicated in regulation of membra    | I.II.B.1 |
| RSc1423 | RS05269 |       |      |       |      |      |      |      |      | TRANSMEMBRANE COG0330, Membrane protease subunits, stomatin/prohibitin hor    | I.II.B.1 |
| RSc1424 | RS05268 |       |      |       |      |      |      |      |      | tmRNA-BINDING PROTEIN (SMALL PROTEIN B)                                       | I.V.B    |
| RSc1425 | RS05267 |       |      |       |      |      |      |      |      | COG2867, Oligoketide cyclase/lipid transport protein                          | I        |
| RSc1426 | RS05266 |       |      |       |      |      |      |      |      | CONSERVED HYPOTHETICAL PROTEIN                                                | V.I.C    |
| RSc1427 | RS05265 |       |      |       |      |      |      |      |      | TRANSMEMBRANE                                                                 | V.I.C    |
| RSc1428 | RS05264 |       |      |       |      |      |      |      |      | TRANSMEMBRANE                                                                 | V.I.C    |
| RSc1429 | RS05263 |       |      |       |      |      |      |      |      | OXIDOREDUCTASE INOSINE-5'-MONOPHOSPHATE DEHYDROGENASE                         | I.D.2    |
| RSc1430 | RS05261 |       |      |       |      |      |      |      |      | TRANSMEMBRANE                                                                 | V.I.C    |
| RSc1431 | RS05262 |       |      |       |      |      |      |      |      | GMP SYNTHASE GLUTAMINE-HYDROLYZING (GLUTAMINE AMIDOTRANSFERA                  | I.D.2    |
| RSc1432 | RS05734 |       |      |       |      |      |      |      |      | TRANSCRIPTION REGULATOR                                                       | V.I.A    |
| RSc1433 | RS05735 |       |      |       |      |      |      |      |      | TRANSMEMBRANE                                                                 | V.I.D    |
| RSc1440 | RS03867 |       |      |       |      |      |      |      |      | TRANSCRIPTION REGULATOR TRANSCRIPTIONAL REGULATORY DNA-BINDING                | I.II.4   |
| RSc1441 | RS03866 |       |      |       |      |      |      |      |      | OXIDOREDUCTASE PROTOCATECHUATE 3,4-DIOXYGENASE (BETA CHAIN)                   | I.I.4    |
| RSc1442 | RS03865 |       |      |       |      |      |      |      |      | OXIDOREDUCTASE PROTOCATECHUATE 3,4-DIOXYGENASE (ALPHA CHAIN)                  | I.I.4    |
| RSc1443 | RS03864 |       |      |       |      |      |      |      |      | 2H PHOSPHOESTERASE (2'-5' RNA LIGASE)                                         | I.II.B.6 |
| RSc1444 | RS03863 |       |      |       |      |      |      |      |      | COG3531, Predicted protein-disulfide isomerase                                | I.II.B.7 |
| RSc1445 | RS03862 |       |      |       |      |      |      |      |      | TRANSMEMBRANE COG2814, Arabinose efflux permease                              | I.V.D.3  |
| RSc1446 | RS03861 |       |      |       |      |      |      |      |      | TRANSCRIPTION REGULATOR HIPA PROTEIN                                          | I.II.B.3 |
| RSc1447 | RS03860 |       |      |       |      |      |      |      |      | TRANSCRIPTION REGULATOR                                                       | V.I.A    |
| RSc1448 | RS03859 |       |      |       |      |      |      |      |      | COG2513, PEP phosphonmutase and related enzymes                               | I        |
| RSc1449 | RS03858 |       |      |       |      |      |      |      |      | COG0602, Organic radical activating enzymes                                   | I.II.B.7 |
| RSc1450 | RS03857 |       |      |       |      |      |      |      |      | 6-PYRUVOYL TETRAHYDROBIOPTERIN SYNTHASE                                       | I        |
| RSc1451 | RS03856 |       |      |       |      |      |      |      |      | COG0590, Cytosine/adenosine deaminase                                         | I        |
| RSc1452 | RS03855 |       |      |       |      |      |      |      |      | TRANSMEMBRANE                                                                 | V.I.C    |
| RSc1453 | RS03854 |       |      |       |      |      |      |      |      | ABC TRANSPORTER ATP-BINDING PROTEIN                                           | I.V.D    |
| RSc1454 | RS03853 |       |      |       |      |      |      |      |      | SIGNAL PEPTIDE                                                                | V.I.D    |
| RSc1455 | RS03852 |       |      |       |      |      |      |      |      | PROLINE-RICH PROTEIN                                                          | V.I.B    |
| RSc1456 | RS03851 |       |      |       |      |      |      |      |      | OXIDOREDUCTASE BETAINE ALDEHYDE DEHYDROGENASE (BADH)                          | I.F      |
| RSc1457 | RS03850 |       |      |       |      |      |      |      |      | COG3313, Predicted Fe-S protein                                               | V.I.C    |
| RSc1458 | RS03849 |       |      |       |      |      |      |      |      | COG3387, Glucoamylase and related glycosyl hydrolases                         | I.II.3   |
| RSc1459 | RS03848 |       |      |       |      |      |      |      |      | CONSERVED HYPOTHETICAL PROTEIN                                                | V.I.C    |
| RSc1460 | RS03847 |       |      |       |      |      |      |      |      | TRANSMEMBRANE METHYL-ACCEPTING CHEMOTAXIS TRANSDUCER PROTEIN                  | I.V.C    |
| RSc1461 | RS03846 |       |      |       |      |      |      |      |      | TRANSMEMBRANE TRANSPORTER PROTEIN                                             | I.V.D    |
| RSc1462 | RS03845 |       |      |       |      |      |      |      |      | SIGNAL PEPTIDE COG0451, Nucleoside-diphosphate-sugar epimerase                | I        |
| RSc1463 | RS03844 |       |      |       |      |      |      |      |      | COG1975: Xanthine and CO dehydrogenases maturation factor                     | I.II.B.7 |
| RSc1464 | RS03843 |       |      |       |      |      |      |      |      | TRANSMEMBRANE                                                                 | V.I.C    |
| RSc1465 | RS03842 |       |      |       |      |      |      |      |      | COG3552, Protein containing von Willebrand factor type A (vWA) domain         | V.I.B    |
| RSc1466 | RS03841 |       |      |       |      |      |      |      |      | COG0714 : MoxR- like ATPase                                                   | V.I.C    |
| RSc1467 | RS03840 |       |      |       |      |      |      |      |      | OXIDOREDUCTASE COG1319, Aerobic-type carbon monoxide dehydrogenase, mid       | I        |
| RSc1468 | RS03839 |       |      |       |      |      |      |      |      | OXIDOREDUCTASE COG1529, Aerobic-type carbon monoxide dehydrogenase, large     | I        |
| RSc1469 | RS03838 |       |      |       |      |      |      |      |      | OXIDOREDUCTASE COG2080, Aerobic-type carbon monoxide dehydrogenase, smal      | I        |
| RSc1470 | RS03837 |       |      |       |      |      |      |      |      | HYPOTHETICAL PROTEIN                                                          | V.I.D    |
| RSc1471 | RS03836 |       |      |       |      |      |      |      |      | SIGNAL PEPTIDE CREA PROTEIN                                                   | V.I.C    |
| RSc1472 | RS03835 |       |      |       |      |      |      |      |      | TRANSCRIPTION REGULATOR                                                       | V.I.A    |
| RSc1473 | RS03834 |       |      |       |      |      |      |      |      | TRANSMEMBRANE MULTIDRUG RESISTANCE-LIKE PROTEIN                               | I.V.D.7  |



|         |         |  |       |       |       |      |  |         |                                                                 |          |
|---------|---------|--|-------|-------|-------|------|--|---------|-----------------------------------------------------------------|----------|
| RSc1591 | RS03953 |  |       | -0.95 | 0.00  |      |  | hpaI1   | OXIDOREDUCTASE 2,4-DIHYDROXYHEPT-2-ENE-1,7-DIOIC ACID ALDOLASE  | I.I.4    |
| RSc1592 | RS03954 |  |       | -1.08 | 0.00  |      |  |         | TRANSCRIPTION REGULATOR                                         | V.I.A    |
| RSc1593 | RS03955 |  |       |       |       |      |  | xthA    | EXODEOXYRIBONUCLEASE III                                        | I.I.A.1  |
| RSc1594 | RS03956 |  |       | -0.38 | 0.03  |      |  | codA    | CYTOSINE DEAMINASE (CYTOSINE AMINOHYDROLASE)                    | I.F.9    |
| RSc1595 | RS03957 |  | 0.53  | 0.01  |       |      |  | prfC    | OLIGOPEPTIDASE A (OPDA PROTEIN)                                 | I.I.A.4  |
| RSc1596 | RS03958 |  |       |       |       |      |  | folD    | OXIDOREDUCTASE BIFUNCTIONAL PROTEIN : METHYLENETETRAHYDROFOLATE | I.B.14   |
| RSc1597 | RS03959 |  | 0.31  | 0.04  | -0.41 | 0.03 |  |         | TRANSCRIPTION REGULATOR RESPONSE REGULATOR                      | V.I.A    |
| RSc1598 | RS03960 |  |       |       |       |      |  |         | TRANSCRIPTION REGULATOR TWO-COMPONENT TRANSMEMBRANE SENSOR      | V.I.A    |
| RSc1599 | RS03961 |  |       |       |       |      |  |         | HYPOTHETICAL PROTEIN                                            | V.I.D    |
| RSc1600 | RS03962 |  | 0.89  | 0.03  | -0.57 | 0.01 |  | aceE    | OXIDOREDUCTASE PYRUVATE DEHYDROGENASE E1 COMPONENT              | I.H.7    |
| RSc1601 | RS03963 |  | 0.78  | 0.00  | -0.65 | 0.01 |  | aceF    | DIHYDROLIPOAMIDE ACETYLTRANSFERASE COMPONENT OF PYRUVATE DEH    | I.H.7    |
| RSc1602 | RS03964 |  | 0.77  | 0.01  | -0.68 | 0.00 |  |         | CONSERVED HYPOTHETICAL PROTEIN                                  | V.I.C    |
| RSc1603 | RS03965 |  | 1.12  | 0.00  | -0.70 | 0.00 |  | lpdA    | DIHYDROLIPOAMIDE DEHYDROGENASE (E3 COMPONENT OF PYRUVATE AND    | I.H.7    |
| RSc1604 | RS03966 |  |       |       | -0.68 | 0.00 |  |         | TRANSMEMBRANE                                                   | V.I.D    |
| RSc1605 | RS03967 |  |       |       |       |      |  |         | TRANSMEMBRANE                                                   | V.I.D    |
| RSc1606 | RS03969 |  | 0.39  | 0.05  |       |      |  | phaP1   | POLYHYDROXYBUTYRATE GRANULE-ASSOCIATED PROTEIN (PHASIN) PHAP1   | I.I.B    |
| RSc1607 | RS03968 |  | 0.60  | 0.05  | -0.49 | 0.03 |  |         | CONSERVED HYPOTHETICAL PROTEIN                                  | V.I.C    |
| RSc1608 | RS03971 |  |       |       |       |      |  |         | TRANSMEMBRANE                                                   | V.I.C    |
| RSc1609 | RS03972 |  |       |       |       |      |  |         | OXIDOREDUCTASE                                                  | V.I.C    |
| RSc1610 | RS03973 |  |       |       | -0.50 | 0.00 |  |         | D-ALANYL-D-ALANINE- ENDOPEPTIDASE (PENICILLIN-BINDING PROTEIN)  | I.V.A    |
| RSc1611 | RS03974 |  |       |       |       |      |  |         | TRANSCRIPTION REGULATOR                                         | V.I.A    |
| RSc1612 | RS03975 |  | 1.25  | 0.02  |       |      |  |         | CONSERVED HYPOTHETICAL PROTEIN                                  | V.I.C    |
| RSc1613 | RS03976 |  |       |       |       |      |  |         | IRON-SULFUR BINDING PROTEIN                                     | V.I.C    |
| RSc1614 | RS03977 |  | -0.99 | 0.01  | 1.28  | 0.00 |  |         | HYPOTHETICAL PROTEIN                                            | V.I.D    |
| RSc1615 | RS03978 |  |       |       |       |      |  |         | TRANSMEMBRANE                                                   | V.I.B    |
| RSc1616 | RS03979 |  |       |       |       |      |  |         | TRANSMEMBRANE                                                   | V.I.D    |
| RSc1617 | RS03980 |  |       |       | -0.84 | 0.00 |  |         | CONSERVED HYPOTHETICAL PROTEIN                                  | V.I.C    |
| RSc1618 | RS03981 |  |       |       | -0.38 | 0.05 |  | aat     | LEUCYL(PHENYLALANYL-TRNA--PROTEIN TRANSFERASE                   | I.I.A.4  |
| RSc1619 | RS03982 |  |       |       |       |      |  |         | HYPOTHETICAL PROTEIN                                            | V.I.B    |
| RSc1620 | RS03983 |  |       |       | -0.67 | 0.00 |  | pyrD    | OXIDOREDUCTASE DIHYDROOROTATE DEHYDROGENASE                     | I.D.1    |
| RSc1621 | RS03984 |  |       |       | -0.60 | 0.00 |  |         | TRANSMEMBRANE                                                   | V.I.D    |
| RSc1622 | RS03985 |  |       |       |       |      |  | kup2    | TRANSMEMBRANE POTASSIUM UPTAKE PROTEIN                          | I.V.D.4  |
| RSc1623 | RS03986 |  | 1.07  | 0.04  | -0.53 | 0.02 |  |         | TRANSMEMBRANE                                                   | V.I.D    |
| RSc1624 | RS03987 |  |       |       | -0.42 | 0.03 |  | tex     | TRANSCRIPTION ACCESSORY PROTEIN                                 | V.I.C    |
| RSc1625 | RS03988 |  |       |       | -0.70 | 0.00 |  |         | CONSERVED HYPOTHETICAL PROTEIN                                  | V.I.C    |
| RSc1626 | RS03989 |  |       |       |       |      |  |         | CONSERVED HYPOTHETICAL PROTEIN                                  | V.I.C    |
| RSc1627 | RS03990 |  |       |       |       |      |  |         | ATP-DEPENDENT DNA HELICASE-RELATED PROTEIN                      | I.I.B.8  |
| RSc1628 | RS03991 |  |       |       |       |      |  |         | TRANSMEMBRANE                                                   | V.I.C    |
| RSc1629 | RS03992 |  |       |       |       |      |  | rluD    | RIBOSOMAL LARGE SUBUNIT PSEUDOURIDINE SYNTHASE D                | I.II.C.1 |
| RSc1630 | RS03993 |  |       |       | -0.45 | 0.03 |  |         | CONSERVED HYPOTHETICAL PROTEIN                                  | V.I.C    |
| RSc1631 | RS03994 |  | 0.57  | 0.00  | -0.38 | 0.03 |  |         | CONSERVED HYPOTHETICAL PROTEIN                                  | V.I.D    |
| RSc1632 | RS03995 |  | 0.63  | 0.04  |       |      |  | phbC    | TRANSMEMBRANE POLY-BETA-HYDROXYBUTYRATE POLYMERASE              | I.I.B    |
| RSc1633 | RS03996 |  |       |       |       |      |  | phbA    | ACETYL-COA ACETYLTRANSFERASE (ACETOACETYL-COA THIOLEASE)        | I.I.B    |
| RSc1634 | RS03997 |  |       |       |       |      |  | phbB    | OXIDOREDUCTASE ACETOACETYL-COA REDUCTASE                        | I.I.B    |
| RSc1635 | RS03998 |  |       |       |       |      |  |         | CONSERVED HYPOTHETICAL PROTEIN                                  | V.I.C    |
| RSc1636 | RS03999 |  | 1.54  | 0.00  |       |      |  |         | CONSERVED HYPOTHETICAL PROTEIN                                  | V.I.C    |
| RSc1637 | RS05826 |  | 0.48  | 0.01  | -0.35 | 0.01 |  | bktB    | BETA-KETOTHIOLASE                                               | I.I.B    |
| RSc1638 | RS04012 |  |       |       |       |      |  |         | SIGNAL PEPTIDE                                                  | V.I.D    |
| RSc1639 | RS04013 |  |       |       | 0.65  | 0.00 |  | metC    | CYSTATHIONINE BETA-LYASE (CYSTEINE LYASE)                       | I.A.12   |
| RSc1640 | RS04014 |  | -0.61 | 0.02  | 1.26  | 0.01 |  | serB    | PHOSPHOSERINE PHOSPHATASE                                       | I.A.10   |
| RSc1641 | RS04016 |  |       |       |       |      |  | argE    | ACETYLMORNITHINE DEACETYLASE (ACETYLMORNITHINASE)               | I.A.17   |
| RSc1642 | RS04017 |  | 0.77  | 0.00  |       |      |  | mfd     | TRANSCRIPTION-REPAIR COUPLING FACTOR                            | I.I.B.6  |
| RSc1643 | RS04018 |  | 0.92  | 0.02  |       |      |  |         | CONSERVED HYPOTHETICAL PROTEIN                                  | V.I.C    |
| RSc1644 | RS04019 |  | 0.61  | 0.00  |       |      |  |         | CONSERVED HYPOTHETICAL PROTEIN                                  | V.I.C    |
| RSc1645 | RS04020 |  |       |       |       |      |  | ahpD    | ANTIOXIDANT PROTEIN                                             | I.V.G.4  |
| RSc1646 | RS04022 |  |       |       |       |      |  | ahpC2   | OXIDOREDUCTASE ALKYL HYDROPEROXIDE REDUCTASE (SUBUNIT C)        | I.V.G.4  |
| RSc1647 | RS04023 |  | 0.62  | 0.01  |       |      |  | risS    | TRANSCRIPTION REGULATOR OXIDATIVE STRESS RESISTANCE TWO-COMP    | I.V.G.4  |
| RSc1648 | RS04025 |  |       |       | -0.38 | 0.00 |  | risA    | TRANSCRIPTION REGULATOR OXIDATIVE STRESS RESISTANCE TWO-COMP    | I.V.G.4  |
| RSc1649 | RS04026 |  |       |       | -0.68 | 0.00 |  |         | TRANSMEMBRANE                                                   | V.I.D    |
| RSc1650 | RS04027 |  |       |       |       |      |  |         | SIGNAL PEPTIDE                                                  | V.I.B    |
| RSc1651 | RS04028 |  |       |       | -0.19 | 0.00 |  |         | CONSERVED HYPOTHETICAL PROTEIN                                  | V.I.C    |
| RSc1652 | RS04029 |  | 0.73  | 0.01  | -0.48 | 0.00 |  | criB    | PHYTOENE SYNTHASE                                               | I        |
| RSc1653 | RS04030 |  | 0.66  | 0.00  | -0.43 | 0.00 |  |         | TRANSMEMBRANE TRANSPORT/EFFLUX PROTEIN                          | I.V.D    |
| RSc1654 | RS04031 |  |       |       |       |      |  |         | TRANSMEMBRANE DRUG EFFLUX PROTEIN                               | I.V.D    |
| RSc1655 | RS04034 |  |       |       | -0.27 | 0.04 |  |         | INTEGRASE/RECOMBINASE                                           | V.A      |
| RSc1656 | RS04036 |  |       |       |       |      |  |         | HYPOTHETICAL PROTEIN                                            | V.I.B    |
| RSc1657 | RS04037 |  |       |       |       |      |  |         | HYPOTHETICAL PROTEIN                                            | V.I.B    |
| RSc1658 | RS04038 |  |       |       |       |      |  |         | JAMM ISOPEPTIDASE                                               | V.I.B    |
| RSc1659 | RS04040 |  |       |       |       |      |  |         | HYPOTHETICAL PROTEIN                                            | V.I.D    |
| RSc1660 | RS04041 |  |       |       |       |      |  |         | HYPOTHETICAL PROTEIN                                            | V.I.D    |
| RSc1661 | RS04042 |  | -0.88 | 0.03  |       |      |  |         | HYPOTHETICAL PROTEIN                                            | V.I.D    |
| RSc1662 | RS04043 |  |       |       | -0.54 | 0.04 |  |         | HYPOTHETICAL PROTEIN                                            | V.I.D    |
| RSc1663 | RS04044 |  |       |       |       |      |  |         | HYPOTHETICAL PROTEIN                                            | V.I.D    |
| RSc1664 | RS04045 |  |       |       |       |      |  |         | HYPOTHETICAL PROTEIN                                            | V.I.D    |
| RSc1665 | RS04046 |  |       |       |       |      |  |         | HYPOTHETICAL PROTEIN                                            | V.I.D    |
| RSc1666 | RS04047 |  |       |       |       |      |  |         | TRANSMEMBRANE                                                   | V.I.D    |
| RSc1667 | RS04048 |  |       |       | -1.23 | 0.01 |  |         | HYPOTHETICAL PROTEIN                                            | V.I.D    |
| RSc1668 | RS04049 |  |       |       |       |      |  |         | HYPOTHETICAL PROTEIN                                            | V.I.D    |
| RSc1669 | RS04051 |  |       |       |       |      |  |         | TRANSMEMBRANE                                                   | V.I.D    |
| RSc1670 | RS04057 |  | 0.79  | 0.00  | -0.68 | 0.00 |  |         | HYPOTHETICAL PROTEIN                                            | V.I.D    |
| RSc1671 | RS04060 |  |       |       | -1.01 | 0.00 |  |         | HYPOTHETICAL PROTEIN                                            | V.I.D    |
| RSc1672 | RS04062 |  |       |       | -0.52 | 0.03 |  |         | TRANSCRIPTION REGULATOR                                         | V.I.A    |
| RSc1673 | RS04063 |  |       |       |       |      |  |         | HYPOTHETICAL PROTEIN                                            | V.I.D    |
| RSc1674 | RS04064 |  |       |       |       |      |  |         | HYPOTHETICAL PROTEIN                                            | V.I.D    |
| RSc1675 | RS04066 |  | -0.68 | 0.01  | -0.44 | 0.00 |  |         | TRANSMEMBRANE                                                   | V.I.D    |
| RSc1676 | RS04065 |  |       |       |       |      |  |         | TRANSMEMBRANE                                                   | V.I.D    |
| RSc1677 | RS04069 |  |       |       |       |      |  |         | HYPOTHETICAL PROTEIN                                            | V.I.D    |
| RSc1678 | RS04071 |  |       |       |       |      |  |         | HYPOTHETICAL PROTEIN                                            | V.I.D    |
| RSc1679 | RS04072 |  |       |       |       |      |  |         | PHAGE PHI-105 HOLIN-LIKE PROTEIN                                | V.D      |
| RSc1680 | RS04075 |  |       |       |       |      |  |         | TRANSMEMBRANE                                                   | V.I.D    |
| RSc1681 | RS04076 |  |       |       |       |      |  |         | TRANSMEMBRANE                                                   | V.I.D    |
| RSc1682 | RS04077 |  |       |       |       |      |  |         | PHAGE PHI-105 ORF25-LIKE PROTEIN                                | V.D      |
| RSc1683 | RS04077 |  | -1.53 | 0.03  | 1.49  | 0.01 |  |         | PHAGE PHI-105 ORF26-LIKE PROTEIN                                | V.D      |
| RSc1684 | RS04078 |  |       |       |       |      |  |         | PHAGE PHI-C31 GP36-LIKE PROTEIN                                 | V.D      |
| RSc1685 | RS04079 |  |       |       |       |      |  |         | BACTERIOPHAGE-RELATED PROTEIN                                   | V.D      |
| RSc1686 | RS04080 |  |       |       |       |      |  |         | phage HK022 GP9-RELATED PROTEIN                                 | V.D      |
| RSc1687 | RS04081 |  |       |       |       |      |  |         | HYPOTHETICAL PROTEIN                                            | V.I.B    |
| RSc1688 | RS04082 |  |       |       |       |      |  |         | HYPOTHETICAL PROTEIN                                            | V.I.B    |
| RSc1689 | RS04083 |  |       |       |       |      |  |         | HYPOTHETICAL PROTEIN                                            | V.I.B    |
| RSc1690 | RS04086 |  |       |       |       |      |  |         | PHAGE HK97 TAIL LENGTH TAPE MEASURE-RELATED PROTEIN             | V.D      |
| RSc1691 | RS04087 |  |       |       |       |      |  |         | PHAGE HK97 GP17-RELATED PROTEIN                                 | V.D      |
| RSc1692 | RS04088 |  |       |       |       |      |  |         | HYPOTHETICAL PROTEIN                                            | V.I.B    |
| RSc1693 | RS04089 |  |       |       |       |      |  |         | TAIL FIBER ASSEMBLY PROTEIN HOMOLOG                             | V.D      |
| RSc1694 | RS04090 |  |       |       |       |      |  |         | PHAGE HK022 GP18-RELATED PROTEIN                                | V.D      |
| RSc1695 | RS04091 |  |       |       |       |      |  |         | PHAGE HK022 GP19-RELATED PROTEIN                                | V.D      |
| RSc1696 | RS04092 |  |       |       |       |      |  |         | PHAGE HK022 GP20-RELATED PROTEIN                                | V.D      |
| RSc1697 | RS04093 |  |       |       | -0.51 | 0.00 |  |         | CONSERVED HYPOTHETICAL PROTEIN                                  | V.I.C    |
| RSc1698 | RS02885 |  |       |       | -0.46 | 0.01 |  |         | BACTERIOPHAGE PROTEIN                                           | V.I.D    |
| RSc1699 | RS02888 |  | 0.74  | 0.05  | -0.43 | 0.05 |  |         | BACTERIOPHAGE PROTEIN                                           | V.D      |
| RSc1700 | RS02889 |  |       |       |       |      |  |         | BACTERIOPHAGE ENDOLYSIN                                         | V.D      |
| RSc1701 | RS02890 |  |       |       |       |      |  |         | TRANSMEMBRANE LIPOPROTEIN                                       | V.I.D    |
| RSc1702 | RS02891 |  |       |       | -0.55 | 0.00 |  |         | TRANSMEMBRANE                                                   | V.I.D    |
| RSc1703 | RS02892 |  |       |       |       |      |  |         | SIGNAL PEPTIDE BACTERIOPHAGE-RELATED PROTEIN                    | V.D      |
| RSc1704 | RS02893 |  |       |       | -0.41 | 0.00 |  | ISRso1: | ISRso18-TRANSPOSASE                                             | V.A      |







|         |         |  |       |       |      |      |  |       |      |                                            |                      |                                                                                  |         |
|---------|---------|--|-------|-------|------|------|--|-------|------|--------------------------------------------|----------------------|----------------------------------------------------------------------------------|---------|
| RSc1933 | RS03502 |  |       | -0.73 | 0.01 |      |  |       |      | TRANSMEMBRANE PHAGE-RELATED PROTEIN        | V.D                  |                                                                                  |         |
| RSc1934 | RS03503 |  |       | -1.29 | 0.02 |      |  | -1.91 | 0.03 | BACTERIOPHAGE PROTEIN                      | V.D                  |                                                                                  |         |
| RSc1935 | RS03504 |  | -1.17 | 0.00  | 1.21 | 0.00 |  |       |      | BACTERIOPHAGE PROTEIN                      | V.D                  |                                                                                  |         |
| RSc1936 | RS03505 |  |       | -1.55 | 0.00 |      |  | -1.19 | 0.05 | BACTERIOPHAGE PROTEIN                      | V.D                  |                                                                                  |         |
| RSc1937 | RS03506 |  |       | -1.94 | 0.00 |      |  | -1.92 | 0.00 | BACTERIOPHAGE PROTEIN                      | V.D                  |                                                                                  |         |
| RSc1938 | RS03507 |  |       | -2.57 | 0.00 |      |  | -0.90 | 0.04 | BACTERIOPHAGE PROTEIN                      | V.D                  |                                                                                  |         |
| RSc1939 | RS03508 |  |       |       |      |      |  |       |      | TERMINASE (ATPase SUBUNIT) RELATED PROTEIN | V.D                  |                                                                                  |         |
| RSc1940 | RS03509 |  |       |       |      |      |  |       |      | TERMINASE (ATPase SUBUNIT) RELATED PROTEIN | V.D                  |                                                                                  |         |
| RSc1941 | RS03510 |  |       |       |      |      |  |       |      | BACTERIOPHAGE PROTEIN                      | V.D                  |                                                                                  |         |
| RSc1942 | RS03511 |  |       | -2.08 | 0.00 |      |  |       |      | CONSERVED HYPOTHETICAL PROTEIN             | V.I.C                |                                                                                  |         |
| RSc1943 | RS03513 |  |       | -2.26 | 0.00 |      |  |       | 1.33 | 0.03                                       | TRANSMEMBRANE        | V.I.C                                                                            |         |
| RSc1944 | RS03512 |  |       | -1.51 | 0.00 |      |  |       |      | VGR-RELATED PROTEIN                        | V.I.C                |                                                                                  |         |
| RSc1945 | RS03514 |  |       |       |      |      |  |       |      | HYPOTHETICAL PROTEIN                       | V.I.D                |                                                                                  |         |
| RSc1946 | RS03515 |  |       |       |      |      |  |       |      | HYPOTHETICAL PROTEIN                       | V.I.D                |                                                                                  |         |
| RSc1947 | RS03518 |  |       |       |      |      |  |       | 1.23 | 0.00                                       | HYPOTHETICAL PROTEIN | V.I.D                                                                            |         |
| RSc1948 | RS03519 |  |       | -0.62 | 0.00 |      |  | -0.51 | 0.01 | 0.59                                       | 0.03                 | HYPOTHETICAL PROTEIN                                                             | V.I.D   |
| RSc1949 | RS03521 |  |       |       |      |      |  |       |      |                                            |                      | TRANSMEMBRANE GLYCINE-RICH PROTEIN                                               | V.I.D   |
| RSc1950 | RS03524 |  |       | -2.82 | 0.02 |      |  |       |      |                                            |                      | TRANSMEMBRANE METHYL-ACCEPTING CHEMOTAXIS TRANSDUCER                             | I.V.C   |
| RSc1951 | RS03525 |  |       | 0.57  | 0.05 |      |  |       |      |                                            |                      | TRANSMEMBRANE SOLUTE:NA+ SYMPORTER PERMEASE                                      | I.V.D.4 |
| RSc1952 | RS03526 |  |       | 0.36  | 0.05 |      |  | -0.25 | 0.05 |                                            |                      | ACETYL-COENZYME A SYNTHETASE                                                     | I.C     |
| RSc1953 | RS03527 |  |       |       |      |      |  | -0.50 | 0.00 |                                            |                      | TRANSMEMBRANE                                                                    | V.I.C   |
| RSc1954 | RS03528 |  |       | 0.39  | 0.03 |      |  | -0.41 | 0.01 |                                            |                      | TRANSMEMBRANE COG2862, Predicted membrane protein                                | V.I.C   |
| RSc1955 | RS03529 |  |       |       |      |      |  |       |      |                                            |                      | FUMARATE HYDRATASE                                                               | I.H.6   |
| RSc1956 | RS03530 |  |       |       |      |      |  |       |      |                                            |                      | GLUTAMATE RACEMASE                                                               | III.B.3 |
| RSc1957 | RS03531 |  | 0.73  | 0.00  |      |      |  |       |      |                                            |                      | TRANSMEMBRANE GLUTAMATE SYMPORT PROTEIN                                          | I.V.D.2 |
| RSc1958 | RS03532 |  |       |       |      |      |  | -0.63 | 0.01 |                                            |                      | CONSERVED HYPOTHETICAL PROTEIN                                                   | V.I.C   |
| RSc1959 | RS03533 |  |       |       |      |      |  | -0.44 | 0.02 |                                            |                      | CONSERVED HYPOTHETICAL PROTEIN                                                   | V.I.C   |
| RSc1960 | RS03534 |  |       |       |      |      |  | -0.93 | 0.00 |                                            |                      | TRANSCRIPTION REGULATOR TRANSCRIPTIONAL REGULATORY DNA-BINDING                   | V.I.A   |
| RSc1961 | RS03535 |  |       |       |      |      |  | -1.28 | 0.00 |                                            |                      | COG0464, ATPases of the AAA+ class                                               | V.I.C   |
| RSc1962 | RS03536 |  |       |       |      |      |  | -1.65 | 0.00 |                                            |                      | TRANSMEMBRANE                                                                    | V.I.D   |
| RSc1963 | RS03537 |  |       | -0.41 | 0.02 |      |  | -1.58 | 0.00 |                                            |                      | TRANSMEMBRANE TONB PROTEIN                                                       | III.B.1 |
| RSc1964 | RS03538 |  |       | 0.34  | 0.03 |      |  | -1.78 | 0.00 |                                            |                      | TRANSMEMBRANE BIOPOLYMER TRANSPORT PROTEIN                                       | I.V.D   |
| RSc1965 | RS03539 |  |       |       |      |      |  | -1.68 | 0.00 |                                            |                      | TRANSMEMBRANE BIOPOLYMER TRANSPORT PROTEIN                                       | I.V.D   |
| RSc1966 | RS03540 |  |       |       |      |      |  | -1.79 | 0.00 |                                            |                      | HEMIN UPTAKE PROTEIN                                                             | I.V.D.5 |
| RSc1967 | RS03541 |  |       | 0.35  | 0.05 |      |  |       |      | 1.02                                       | 0.00                 | GLCG PROTEIN                                                                     | V.I.C   |
| RSc1968 | RS03542 |  |       |       |      |      |  |       |      | 0.76                                       | 0.05                 | TRANSMEMBRANE                                                                    | V.I.C   |
| RSc1969 | RS03543 |  |       |       |      |      |  | -0.94 | 0.00 |                                            |                      | TRANSMEMBRANE                                                                    | V.I.C   |
| RSc1970 | RS03544 |  |       |       |      |      |  | -0.75 | 0.00 |                                            |                      | HYPOTHETICAL PROTEIN                                                             | V.I.D   |
| RSc1971 | RS03545 |  |       |       |      |      |  | -0.54 | 0.00 |                                            |                      | POLYHYDROXYBUTYRATE GRANULE-ASSOCIATED PROTEIN (PHASIN) PHAP3                    | II.B    |
| RSc1972 | RS03546 |  |       |       |      |      |  |       |      | 0.44                                       | 0.04                 | TRANSMEMBRANE OSMOTICALLY INDUCIBLE LIPOPROTEIN B1                               | I.V.F.2 |
| RSc1973 | RS03547 |  |       |       |      |      |  |       |      |                                            |                      | ABC TRANSPORTER ATP-BINDING PROTEIN                                              | I.V.D   |
| RSc1974 | RS03548 |  |       |       |      |      |  | -0.52 | 0.01 |                                            |                      | ABC TRANSPORTER TRANSMEMBRANE PERMEASE PROTEIN                                   | I.V.D   |
| RSc1975 | RS03549 |  |       |       |      |      |  | -0.47 | 0.01 |                                            |                      | AMIDOPHOSPHORIBOSYLTRANSFERASE                                                   | I.D.2   |
| RSc1976 | RS03550 |  |       | 0.62  | 0.00 |      |  | -0.31 | 0.01 |                                            |                      | TRANSMEMBRANE COLICIN V PRODUCTION PROTEIN                                       | V.C     |
| RSc1977 | RS03551 |  |       |       |      |      |  |       |      |                                            |                      | TRANSMEMBRANE                                                                    | V.I.B   |
| RSc1978 | RS03552 |  |       |       |      |      |  |       |      |                                            |                      | BIFUNCTIONAL PROTEIN: FOLYLPOLYGLUTAMATE SYNTHASE AND DIHYDROF                   | I.B.14  |
| RSc1979 | RS03553 |  |       |       |      |      |  |       |      | -0.38                                      | 0.01                 | ACETYL-COENZYME A CARBOXYLASE CARBOXYL TRANSFERASE (SUBUNIT B)                   | I.C     |
| RSc1980 | RS03554 |  | 0.31  | 0.02  |      |      |  |       |      |                                            |                      | TRYPTOPHAN SYNTHASE (ALPHA CHAIN)                                                | I.A.6   |
| RSc1981 | RS03555 |  |       |       |      |      |  | 0.26  | 0.00 |                                            |                      | DNA-METHYLTRANSFERASE (DNA-MODIFICATION METHYLASE)                               | II.B.8  |
| RSc1982 | RS03556 |  |       |       |      |      |  |       |      |                                            |                      | TRYPTOPHAN SYNTHASE (BETA CHAIN)                                                 | I.A.6   |
| RSc1983 | RS03412 |  |       |       |      |      |  |       |      |                                            |                      | N-(5'-PHOSPHORIBOSYL)ANTHRANILATE ISOMERASE                                      | I.A.6   |
| RSc1984 | RS03413 |  |       |       |      |      |  | 0.27  | 0.03 |                                            |                      | TRNA PSEUDOURIDINE SYNTHASE                                                      | II.D.1  |
| RSc1985 | RS03414 |  | 1.00  | 0.03  |      |      |  | -0.38 | 0.00 |                                            |                      | TRANSMEMBRANE TYPE IV PILUS ASSEMBLY FimV-RELATED PROTEIN                        | III.A.2 |
| RSc1986 | RS03415 |  |       |       |      |      |  | -0.38 | 0.01 |                                            |                      | OXIDOREDUCTASE ASPARTATE-SEMIALDEHYDE DEHYDROGENASE                              | I.A     |
| RSc1987 | RS03416 |  |       |       |      |      |  |       |      | 0.58                                       | 0.05                 | OXIDOREDUCTASE 3-ISOPROPYLMALATE DEHYDROGENASE                                   | I.A.1   |
| RSc1988 | RS03417 |  |       |       |      |      |  | 1.03  | 0.00 |                                            |                      | 3-ISOPROPYLMALATE DEHYDRATASE (SMALL SUBUNIT)                                    | I.A.1   |
| RSc1989 | RS03557 |  |       |       |      |      |  | 0.47  | 0.00 |                                            |                      | 3-ISOPROPYLMALATE DEHYDRATASE (LARGE SUBUNIT)                                    | I.A.1   |
| RSc1990 | RS03558 |  |       |       |      |      |  |       |      |                                            |                      | CITRATE SYNTHASE                                                                 | I.H.6   |
| RSc1991 | RS03559 |  |       |       |      |      |  | 1.00  | 0.00 |                                            |                      | CONSERVED HYPOTHETICAL PROTEIN                                                   | V.I.C   |
| RSc1992 | RS03560 |  |       |       |      |      |  | 1.13  | 0.02 |                                            |                      | OXIDOREDUCTASE SUCCINATE DEHYDROGENASE (IRON-SULFUR PROTEIN S)                   | I.H.6   |
| RSc1993 | RS03561 |  |       |       |      |      |  |       |      |                                            |                      | OXIDOREDUCTASE SUCCINATE DEHYDROGENASE (FLAVOPROTEIN SUBUNIT)                    | I.H.6   |
| RSc1994 | RS03562 |  |       |       |      |      |  | 0.84  | 0.01 |                                            |                      | OXIDOREDUCTASE TRANSMEMBRANE SUCCINATE DEHYDROGENASE (HYDR)                      | I.H.6   |
| RSc1995 | RS03563 |  |       |       |      |      |  | 0.69  | 0.04 |                                            |                      | OXIDOREDUCTASE TRANSMEMBRANE SUCCINATE DEHYDROGENASE (CYTOC)                     | I.H.6   |
| RSc1996 | RS03564 |  |       |       |      |      |  |       |      |                                            |                      | TRANSCRIPTION REGULATOR                                                          | V.I.A   |
| RSc1997 | RS03565 |  |       |       |      |      |  | -0.89 | 0.00 |                                            |                      | OXIDOREDUCTASE MALATE DEHYDROGENASE                                              | I.H.6   |
| RSc1998 | RS03566 |  |       |       |      |      |  | 0.83  | 0.00 |                                            |                      | COG2031, Citrate lyase beta subunit                                              | I       |
| RSc1999 | RS03567 |  |       |       |      |      |  | -0.80 | 0.01 |                                            |                      | CARBOXYVINYL-CARBOXYPHOSPHONATE PHOSPHORYLMUTASE                                 | I.I.4   |
| RSc2000 | RS03568 |  |       |       |      |      |  | 0.93  | 0.01 |                                            |                      | SIGNAL PEPTIDE                                                                   | V.I.C   |
| RSc2001 | RS03569 |  |       |       |      |      |  | 0.46  | 0.04 |                                            |                      | PRPD PROTEIN                                                                     | I.I.4   |
| RSc2002 | RS03570 |  |       |       |      |      |  |       |      |                                            |                      | ACONITATE HYDRATASE                                                              | I.H.6   |
| RSc2003 | RS03571 |  |       |       |      |      |  | 1.13  | 0.02 |                                            |                      | SIGNAL PEPTIDE                                                                   | V.I.D   |
| RSc2004 | RS03572 |  |       |       |      |      |  |       |      |                                            |                      | CONSERVED HYPOTHETICAL PROTEIN                                                   | V.I.C   |
| RSc2005 | RS03573 |  |       |       |      |      |  | -0.80 | 0.00 |                                            |                      | ABC TRANSPORTER COG0747, ABC-type dipeptide transport system, periplasmic c      | I.V.D.2 |
| RSc2006 | RS03574 |  |       |       |      |      |  | 0.64  | 0.02 |                                            |                      | TRANSMEMBRANE LIPOPROTEIN                                                        | V.I.C   |
| RSc2007 | RS03575 |  |       |       |      |      |  | 0.53  | 0.04 |                                            |                      | COG2866, Predicted carboxypeptidase                                              | I       |
| RSc2008 | RS03576 |  |       |       |      |      |  | 0.64  | 0.00 |                                            |                      | CONSERVED HYPOTHETICAL PROTEIN                                                   | V.I.C   |
| RSc2009 | RS03577 |  |       |       |      |      |  |       |      |                                            |                      | CONSERVED HYPOTHETICAL PROTEIN                                                   | V.I.C   |
| RSc2010 | RS03578 |  |       |       |      |      |  | 0.48  | 0.05 |                                            |                      | COG0436, Aspartate/tyrosine/aromatic aminotransferase                            | I       |
| RSc2011 | RS03579 |  |       |       |      |      |  |       |      |                                            |                      | GLUTATHIONE S-TRANSFERASE                                                        | II.B.7  |
| RSc2012 | RS03580 |  |       |       |      |      |  | 0.31  | 0.04 |                                            |                      | OXIDOREDUCTASE 3-HYDROXYBUTYRYL-COA DEHYDROGENASE                                | I.I.4   |
| RSc2013 | RS03581 |  |       |       |      |      |  |       |      |                                            |                      | ENOYL-COA HYDRATASE                                                              | I.I.4   |
| RSc2014 | RS03582 |  |       |       |      |      |  | -0.71 | 0.02 |                                            |                      | COG0406, Fructose-2,6-bisphosphatase                                             | I       |
| RSc2015 | RS03583 |  |       |       |      |      |  | -0.48 | 0.02 |                                            |                      | COG3173, Predicted aminoglycoside phosphotransferase                             | V.I.C   |
| RSc2016 | RS03584 |  |       |       |      |      |  | -0.68 | 0.00 |                                            |                      | CONSERVED HYPOTHETICAL PROTEIN                                                   | V.I.C   |
| RSc2017 | RS03585 |  |       |       |      |      |  | -0.57 | 0.00 |                                            |                      | TRANSCRIPTION REGULATOR                                                          | V.I.A   |
| RSc2018 | RS03586 |  |       |       |      |      |  | -0.51 | 0.01 |                                            |                      | SIGNAL PEPTIDE COG2050, Uncharacterized protein, possibly involved in aromatic c | V.I.C   |
| RSc2019 | RS03587 |  |       |       |      |      |  | 0.60  | 0.05 |                                            |                      | OXIDOREDUCTASE ACYL-CoA DEHYDROGENASE                                            | I       |
| RSc2020 | RS03588 |  |       |       |      |      |  |       |      |                                            |                      | GLUTATHIONE-S-TRANSFERASE                                                        | II.B.7  |
| RSc2021 | RS03589 |  |       |       |      |      |  | -0.65 | 0.00 |                                            |                      | TRANSMEMBRANE COG2020, Putative protein-S-isoprenylcysteine methyltransferas     | II.B.7  |
| RSc2022 | RS03590 |  |       |       |      |      |  |       |      | -0.98                                      | 0.03                 | HYPOTHETICAL PROTEIN                                                             | V.I.D   |
| RSc2023 | RS03591 |  |       |       |      |      |  | 0.45  | 0.05 |                                            |                      | TRANSMEMBRANE COG1279, LysE-type efflux permease                                 | I.V.D   |
| RSc2024 | RS03592 |  |       |       |      |      |  | -2.10 | 0.01 |                                            |                      | TRANSMEMBRANE COG3239, Fatty acid desaturase                                     | I       |
| RSc2025 | RS03593 |  |       |       |      |      |  | -0.78 | 0.00 |                                            |                      | HYPOTHETICAL PROTEIN                                                             | V.I.D   |
| RSc2026 | RS03598 |  |       |       |      |      |  | 0.32  | 0.01 |                                            |                      | HYPOTHETICAL PROTEIN                                                             | V.I.D   |
| RSc2027 | RS03594 |  |       |       |      |      |  | -1.18 | 0.05 |                                            |                      | HYPOTHETICAL PROTEIN                                                             | V.I.D   |
| RSc2028 | RS03599 |  |       |       |      |      |  |       |      |                                            |                      | HYPOTHETICAL PROTEIN                                                             | V.I.D   |
| RSc2029 | RS03595 |  |       |       |      |      |  | 1.26  | 0.02 |                                            |                      | UREASE ACCESSORY PROTEIN                                                         | I.F.5   |
| RSc2030 | RS03600 |  |       |       |      |      |  | 1.11  | 0.00 |                                            |                      | UREASE ACCESSORY PROTEIN UREJ                                                    | I.F.5   |
| RSc2031 | RS03601 |  |       |       |      |      |  |       |      |                                            |                      | UREASE ACCESSORY PROTEIN UREK                                                    | I.F.5   |
| RSc2032 | RS02789 |  |       |       |      |      |  | 0.48  | 0.01 |                                            |                      | UREASE (ALPHA SUBUNIT)                                                           | I.F.5   |
| RSc2033 | RS02962 |  |       |       |      |      |  | 0.67  | 0.00 |                                            |                      | UREASE (BETA SUBUNIT)                                                            | I.F.5   |
| RSc2034 | RS03028 |  |       |       |      |      |  | 0.64  | 0.02 |                                            |                      | TRANSMEMBRANE UREASE ACCESSORY PROTEIN UREJ                                      | I.F.5   |
| RSc2035 | RS03029 |  |       |       |      |      |  |       |      |                                            |                      | UREASE (GAMMA SUBUNIT)                                                           | I.F.5   |
| RSc2036 | RS03030 |  |       |       |      |      |  | 0.89  | 0.01 |                                            |                      | UREASE ACCESSORY PROTEIN UREK                                                    | I.F.5   |
| RSc2037 | RS03602 |  |       |       |      |      |  |       |      |                                            |                      | ABC TRANSPORTER ATP-BINDING PROTEIN                                              | I.V.D   |
| RSc2038 | RS03603 |  |       |       |      |      |  | -1.76 | 0.02 |                                            |                      | ABC TRANSPORTER ATP-BINDING PROTEIN                                              | I.V.D   |
| RSc2039 | RS03604 |  |       |       |      |      |  |       |      |                                            |                      | TRANSMEMBRANE PERMEASE TRANSPORTER PROTEIN                                       | I.V.D   |
| RSc2040 | RS03605 |  |       |       |      |      |  | -0.94 | 0.02 |                                            |                      | TRANSMEMBRANE PERMEASE TRANSPORTER PROTEIN                                       | I.V.D   |
| RSc2041 | RS03606 |  |       |       |      |      |  | -0.67 | 0.04 |                                            |                      | ABC TRANSPORTER COG0683, ABC-type branched-chain amino acid transport syst       | I.V.D   |
| RSc2042 | RS03607 |  |       |       |      |      |  | -0.65 | 0.02 |                                            |                      | COG2030, Acyl dehydratase                                                        | I       |
| RSc2043 | RS03608 |  |       |       |      |      |  | 0.33  | 0.05 |                                            |                      | COG2030, Acyl dehydratase                                                        | I       |
| RSc2044 | RS03609 |  |       |       |      |      |  |       |      |                                            |                      | OXIDOREDUCTASE ACYL-COA DEHYDROGENASE                                            | I.I.1   |
| RSc2045 | RS03610 |  | 0.87  | 0.03  |      |      |  | 0.70  | 0.00 |                                            |                      | OXIDOREDUCTASE ACYL-COA DEHYDROGENASE                                            | I       |



|         |         |       |      |       |      |       |       |       |                                                                                         |                                           |                                                                                   |                                    |        |
|---------|---------|-------|------|-------|------|-------|-------|-------|-----------------------------------------------------------------------------------------|-------------------------------------------|-----------------------------------------------------------------------------------|------------------------------------|--------|
| RSc2159 | RS01443 |       |      | -0.64 | 0.01 | -0.81 | 0.01  | rph   | RIBONUCLEASE PH (TRNA NUCLEOTIDYLTRANSFERASE)                                           | II.A.2                                    |                                                                                   |                                    |        |
| RSc2160 | RS01442 |       |      |       |      | -0.65 | 0.03  |       | COG0127, Xanthosine triphosphate pyrophosphatase                                        | I                                         |                                                                                   |                                    |        |
| RSc2161 | RS01441 | 0.89  | 0.01 | -0.51 | 0.01 |       |       |       | OXIDOREDUCTASE COG0635, Coproporphyrinogen III oxidase and related Fe-S oxidase         | II.B.1                                    |                                                                                   |                                    |        |
| RSc2162 | RS01439 |       |      |       |      |       |       |       | COG1234, Metal-dependent hydrolases of the beta-lactamase superfamily III               | II                                        |                                                                                   |                                    |        |
| RSc2163 | RS01438 |       |      | -0.34 | 0.01 |       | 1.36  | 0.00  | CONSERVED HYPOTHETICAL PROTEIN                                                          | V.I.C                                     |                                                                                   |                                    |        |
| RSc2164 | RS01436 |       |      | -0.23 | 0.03 | 0.56  | 0.02  |       | SIGNAL PEPTIDE                                                                          | V.I.B                                     |                                                                                   |                                    |        |
| RSc2165 | RS01434 |       |      |       |      |       |       | pcp1  | PYRROLIDONE-CARBOXYLATE PEPTIDASE (5-OXOPROLYL-PEPTIDASE)                               | II.F.14                                   |                                                                                   |                                    |        |
| RSc2166 | RS01617 |       |      | -0.63 | 0.01 | -1.17 | 0.01  |       | SIGNAL PEPTIDE COG1638, TRAP-type C4-dicarboxylate transport system, periplasmic        | IV.D.3                                    |                                                                                   |                                    |        |
| RSc2167 | RS01432 | -0.57 | 0.05 | 1.02  | 0.03 | 0.83  | 0.00  |       | TRANSMEMBRANE                                                                           | V.I.C                                     |                                                                                   |                                    |        |
| RSc2168 | RS01431 |       |      | 0.38  | 0.01 |       | 0.45  | 0.03  | TRANSMEMBRANE                                                                           | V.I.C                                     |                                                                                   |                                    |        |
| RSc2169 | RS01430 |       |      |       |      | 0.46  | 0.04  |       | CONSERVED HYPOTHETICAL PROTEIN                                                          | V.I.C                                     |                                                                                   |                                    |        |
| RSc2170 | RS01429 |       |      | 0.68  | 0.01 |       |       |       | COG1984, Allophanate hydrolase subunit 2                                                | II                                        |                                                                                   |                                    |        |
| RSc2171 | RS01428 |       |      |       |      |       |       |       | COG2049, Allophanate hydrolase subunit 1                                                | II                                        |                                                                                   |                                    |        |
| RSc2172 | RS01427 |       |      |       |      |       |       |       | TRANSMEMBRANE DRUG TRANSPORT PROTEIN                                                    | IV.D                                      |                                                                                   |                                    |        |
| RSc2173 | RS01426 |       |      | -0.40 | 0.05 |       |       |       | ABC TRANSPORTER SUGAR ATP BINDING PROTEIN                                               | IV.D.3                                    |                                                                                   |                                    |        |
| RSc2174 | RS01425 |       |      |       |      |       |       |       | ABC TRANSPORTER TRANSMEMBRANE PROTEIN                                                   | IV.D                                      |                                                                                   |                                    |        |
| RSc2175 | RS01424 |       |      | 0.85  | 0.02 |       |       |       | ABC TRANSPORTER TRANSMEMBRANE PROTEIN                                                   | IV.D                                      |                                                                                   |                                    |        |
| RSc2177 | RS01422 |       |      |       |      |       |       |       | LIPOPROTEIN                                                                             | V.I.C                                     |                                                                                   |                                    |        |
| RSc2178 | RS01421 |       |      |       |      |       |       |       | HYPOTHETICAL PROTEIN                                                                    | V.I.D                                     |                                                                                   |                                    |        |
| RSc2179 | RS01420 |       |      |       |      | 0.53  | 0.01  |       | TRANSMEMBRANE                                                                           | V.I.B                                     |                                                                                   |                                    |        |
| RSc2180 | RS01419 |       |      | 0.90  | 0.00 |       | -1.86 | 0.00  | TRANSMEMBRANE                                                                           | V.I.D                                     |                                                                                   |                                    |        |
| RSc2181 | RS01418 |       |      |       |      |       |       |       | HYPOTHETICAL PROTEIN                                                                    | V.I.B                                     |                                                                                   |                                    |        |
| RSc2182 | RS01417 |       |      |       |      |       |       |       | HYPOTHETICAL PROTEIN                                                                    | V.I.D                                     |                                                                                   |                                    |        |
| RSc2183 | RS01416 |       |      |       |      | -0.51 | 0.02  |       | CONSERVED HYPOTHETICAL PROTEIN                                                          | V.I.C                                     |                                                                                   |                                    |        |
| RSc2184 | RS01415 |       |      | 0.71  | 0.00 | -0.28 | 0.05  |       | OXIDOREDUCTASE NADPH:QUINONE REDUCTASE, ZETA-CRYSTALLIN HOMOLOG I                       | I.G.1                                     |                                                                                   |                                    |        |
| RSc2185 | RS01414 | -0.48 | 0.00 | 0.47  | 0.01 |       | 0.48  | 0.01  | METHYLGLYOXAL SYNTHASE                                                                  | IV.D.18                                   |                                                                                   |                                    |        |
| RSc2186 | RS01413 |       |      | 0.42  | 0.05 | -0.42 | 0.00  |       | OXIDOREDUCTASE COG1028, Dehydrogenases with different specificities (related to)        | I                                         |                                                                                   |                                    |        |
| RSc2187 | RS01412 |       |      | 0.89  | 0.00 |       |       |       | TRANSMEMBRANE                                                                           | V.I.C                                     |                                                                                   |                                    |        |
| RSc2188 | RS01411 |       |      |       |      | 0.45  | 0.01  | 0.92  | 0.03                                                                                    | upp                                       | URACIL PHOSPHORIBOSYLTRANSFERASE                                                  | I.F.1                              |        |
| RSc2189 | RS01410 |       |      | 0.56  | 0.01 |       | 0.75  | 0.01  | COG0433, PREDICTED ATPase                                                               | V.I.C                                     |                                                                                   |                                    |        |
| RSc2190 | RS01409 |       |      | -1.34 | 0.01 | 1.79  | 0.00  |       | CONSERVED HYPOTHETICAL PROTEIN                                                          | V.I.C                                     |                                                                                   |                                    |        |
| RSc2191 | RS01408 |       |      | 0.74  | 0.00 |       |       | -0.30 | 0.01                                                                                    | purD                                      | PHOSPHORIBOSYLAMINE--GLYCINE LIGASE                                               | I.D.2                              |        |
| RSc2192 | RS01407 | 0.51  | 0.04 |       |      | -0.36 | 0.04  |       | OXIDOREDUCTASE COPROPORPHYRINOGEN III OXIDASE, AEROBIC                                  | II.B.4                                    |                                                                                   |                                    |        |
| RSc2193 | RS01406 |       |      |       |      | -0.38 | 0.00  |       | COG1057, Nicotinic acid mononucleotide adenyllyltransferase                             | I                                         |                                                                                   |                                    |        |
| RSc2194 | RS01405 |       |      |       |      | -0.26 | 0.03  |       | CONSERVED HYPOTHETICAL PROTEIN                                                          | V.I.C                                     |                                                                                   |                                    |        |
| RSc2195 | RS01404 |       |      |       |      |       |       |       | CONSERVED HYPOTHETICAL PROTEIN                                                          | V.I.C                                     |                                                                                   |                                    |        |
| RSc2196 | RS01403 |       |      |       |      | -0.47 | 0.00  |       | COG0424, Nucleotide-binding protein implicated in inhibition of septum formation        | IV.A                                      |                                                                                   |                                    |        |
| RSc2197 | RS01402 |       |      |       |      | -0.24 | 0.02  |       | RIBONUCLEASE G (RNASE G) (CYTOPLASMIC AXIAL FILAMENT PROTEIN)                           | IV.A                                      |                                                                                   |                                    |        |
| RSc2198 | RS01401 |       |      |       |      |       |       |       | CONSERVED HYPOTHETICAL PROTEIN                                                          | V.I.C                                     |                                                                                   |                                    |        |
| RSc2199 | RS01400 |       |      |       |      | -0.37 | 0.02  | 0.78  | 0.02                                                                                    | COG128, Uncharacterized conserved protein | V.I.C                                                                             |                                    |        |
| RSc2200 | RS01399 |       |      | -1.95 | 0.00 | 2.19  | 0.00  |       | ABC TRANSPORTER PROTEIN ABC-TYPE MULTIDRUG TRANSPORT SYSTEM, I                          | IV.D                                      |                                                                                   |                                    |        |
| RSc2201 | RS01398 |       |      |       |      | -0.27 | 0.03  |       | SIGNAL PEPTIDE COG1216, Glycosyltransferase                                             | I                                         |                                                                                   |                                    |        |
| RSc2202 | RS01397 |       |      |       |      |       |       | -0.55 | 0.04                                                                                    |                                           | GLYCOSYL TRANSFERASE                                                              | II.B                               |        |
| RSc2203 | RS01396 |       |      |       |      |       |       |       | COG1216, Glycosyltransferase                                                            | II.B.2                                    |                                                                                   |                                    |        |
| RSc2204 | RS01395 |       |      | 0.80  | 0.05 | -0.38 | 0.01  |       | TRANSMEMBRANE LIPOPOLYSACCHARIDE O-ANTIGEN LIGASE                                       | II.B.2                                    |                                                                                   |                                    |        |
| RSc2205 | RS01394 |       |      |       |      | -0.41 | 0.00  |       | DNA POLYMERASE III (ALPHA CHAIN)                                                        | II.B.8                                    |                                                                                   |                                    |        |
| RSc2206 | RS01393 |       |      |       |      |       | 2.13  | 0.02  | COG1054, Predicted sulfurtransferase                                                    | I.F.3                                     |                                                                                   |                                    |        |
| RSc2207 | RS01392 |       |      |       |      | -0.91 | 0.00  | 0.44  | 0.04                                                                                    | COG0655, Multimeric flavodoxin WrbA       | V.I.C                                                                             |                                    |        |
| RSc2208 | RS01391 | -1.58 | 0.01 |       |      | -2.16 | 0.00  |       | PIRIN-RELATED PROTEIN                                                                   | V.I.C                                     |                                                                                   |                                    |        |
| RSc2209 | RS01390 | -1.73 | 0.00 |       |      | -0.57 | 0.00  |       | TRANSCRIPTION REGULATOR TRANSCRIPTIONAL REGULATOR                                       | IV.A                                      |                                                                                   |                                    |        |
| RSc2210 | RS01389 |       |      |       |      | -0.52 | 0.00  |       | COG0008, Glutamyl- and glutaminyl-tRNA synthetases                                      | II.D.1                                    |                                                                                   |                                    |        |
| RSc2211 | RS01388 |       |      |       |      | -0.50 | 0.01  |       | ATP-DEPENDENT RNA HELICASE                                                              | II.B.7                                    |                                                                                   |                                    |        |
| RSc2212 | RS01387 |       |      |       |      |       |       |       | CONSERVED HYPOTHETICAL PROTEIN                                                          | V.I.C                                     |                                                                                   |                                    |        |
| RSc2213 | RS01386 |       |      | 0.56  | 0.01 |       |       | -1.13 | 0.05                                                                                    | rhiE2                                     | TRANSCRIPTION REGULATOR TRANSCRIPTIONAL REGULATOR                                 | IV.A                               |        |
| RSc2214 | RS01385 |       |      |       |      |       |       |       | COG0491, Zn-dependent hydrolase                                                         | II                                        |                                                                                   |                                    |        |
| RSc2215 | RS01384 |       |      |       |      |       | 0.43  | 0.05  | TRANSCRIPTION REGULATOR RNA POLYMERASE SIGMA D (SIGMA-70) FACTOR I                      | E.1                                       |                                                                                   |                                    |        |
| RSc2216 | RS01383 |       |      | 0.34  | 0.02 | -0.33 | 0.03  |       | DNA PRIMASE                                                                             | II.B.8                                    |                                                                                   |                                    |        |
| RSc2217 | RS01382 |       |      | 0.41  | 0.05 |       |       | -1.12 | 0.05                                                                                    | dnaG                                      | CONSERVED HYPOTHETICAL PROTEIN                                                    | V.I.C                              |        |
| RSc2218 | RS01381 |       |      |       |      | -0.46 | 0.05  |       | TRANSMEMBRANE COG2081, Flavoprotein                                                     | V.I.C                                     |                                                                                   |                                    |        |
| RSc2219 | RS01380 |       |      |       |      |       |       |       | O-SIALOGLYCOPROTEIN ENDOPEPTIDASE                                                       | II.A.4                                    |                                                                                   |                                    |        |
| RSc2220 | RS01379 |       |      |       |      | -0.76 | 0.00  |       | CONSERVED HYPOTHETICAL PROTEIN                                                          | V.I.C                                     |                                                                                   |                                    |        |
| RSc2221 | RS01378 |       |      |       |      | -0.40 | 0.01  |       | 1-DEOXYXYLULOSE-5-PHOSPHATE SYNTHASE                                                    | IV.F.18                                   |                                                                                   |                                    |        |
| RSc2222 | RS01377 |       |      | 0.46  | 0.02 | -0.47 | 0.02  |       | GERANYLTRANSFERASE (FARNESYL-DIPHOSPHATE SYNTHASE)                                      | I.B.5                                     |                                                                                   |                                    |        |
| RSc2223 | RS01376 |       |      |       |      | -0.51 | 0.00  | 0.43  | 0.02                                                                                    | xseB                                      | EXODEXOXYRIBONUCLEASE SMALL SUBUNIT                                               | II.A.1                             |        |
| RSc2224 | RS01375 |       |      | 0.62  | 0.01 |       |       | -0.81 | 0.00                                                                                    |                                           | OXIDOREDUCTASE COG4638, Phenylpropionate dioxygenase and related ring-hydroxylase | V.I.C                              |        |
| RSc2225 | RS01374 |       |      |       |      | -0.32 | 0.02  |       | TRANSMEMBRANE                                                                           | V.I.C                                     |                                                                                   |                                    |        |
| RSc2226 | RS01373 |       |      |       |      |       |       |       | THIOSULFATE SULFURTRANSFERASE                                                           | I.F.3                                     |                                                                                   |                                    |        |
| RSc2227 | RS01372 |       |      |       |      |       |       | -0.94 | 0.02                                                                                    | sseA                                      | TRANSMEMBRANE COG0428, Predicted divalent heavy-metal cations transporter         | IV.D.4                             |        |
| RSc2228 | RS01371 |       |      |       |      | -0.60 | 0.02  |       | COG0412, Dienelactone hydrolase and related enzymes                                     | I                                         |                                                                                   |                                    |        |
| RSc2229 | RS01370 |       |      |       |      |       |       | -0.27 | 0.04                                                                                    | ndh                                       | OXIDOREDUCTASE NADH DEHYDROGENASE, MEMBRANE FLAVOPROTEIN FACTOR I                 | H.3                                |        |
| RSc2230 | RS01369 |       |      |       |      | -0.27 | 0.04  |       | DNA POLYMERASE I                                                                        | II.B.8                                    |                                                                                   |                                    |        |
| RSc2231 | RS01368 |       |      |       |      |       |       |       | COG1611, Rossmann fold nucleotide-binding protein                                       | V.I.C                                     |                                                                                   |                                    |        |
| RSc2232 | RS01367 |       |      |       |      | -0.38 | 0.02  |       | TRANSMEMBRANE                                                                           | V.I.B                                     |                                                                                   |                                    |        |
| RSc2233 | RS01366 |       |      | 0.72  | 0.02 |       |       |       | HOMOSERINE KINASE                                                                       | II.A.12                                   |                                                                                   |                                    |        |
| RSc2234 | RS01365 |       |      |       |      | -0.39 | 0.04  | -0.41 | 0.05                                                                                    | thrB                                      | TRANSMEMBRANE                                                                     | V.I.C                              |        |
| RSc2235 | RS01364 |       |      |       |      |       |       |       | DNA HELICASE II                                                                         | II.B.8                                    |                                                                                   |                                    |        |
| RSc2236 | RS01363 |       |      | 0.44  | 0.00 |       |       |       | VALYL-TRNA SYNTHETASE (VALINE--TRNA LIGASE)                                             | II.D.1                                    |                                                                                   |                                    |        |
| RSc2237 | RS01362 |       |      | 0.65  | 0.00 |       |       |       | UTP--GLUCOSE-1-PHOSPHATE URIDYLYLTRANSFERASE                                            | II.A                                      |                                                                                   |                                    |        |
| RSc2238 | RS01361 |       |      |       |      |       |       | -0.12 | 0.00                                                                                    | galU1                                     | TRANSMEMBRANE                                                                     | V.I.C                              |        |
| RSc2239 | RS01360 |       |      |       |      | -0.70 | 0.00  |       | -1.06                                                                                   | 0.02                                      | infA2                                                                             | TRANSLATION INITIATION FACTOR IF-1 | II.B.7 |
| RSc2240 | RS01359 |       |      |       |      | -1.17 | 0.00  |       | CONSERVED HYPOTHETICAL PROTEIN                                                          | V.I.C                                     |                                                                                   |                                    |        |
| RSc2241 | RS01318 |       |      | 0.89  | 0.03 | -0.46 | 0.03  |       | COG2342, Extracellular endo alpha-1,4 polygalactosaminidase or related polysaccharidase | II.A.3                                    |                                                                                   |                                    |        |
| RSc2242 | RS01317 | -0.77 | 0.04 |       |      | -1.61 | 0.00  |       | OXIDOREDUCTASE 4-HYDROXYBENZOATE 3-MONOXYGENASE                                         | II.A                                      |                                                                                   |                                    |        |
| RSc2243 | RS01316 |       |      |       |      | -0.68 | 0.03  |       | TRANSCRIPTION REGULATOR                                                                 | V.I.A                                     |                                                                                   |                                    |        |
| RSc2244 | RS01315 |       |      | -1.06 | 0.00 | 1.71  | 0.00  | 1.00  | 0.03                                                                                    | pobB                                      | ABC TRANSPORTER SUBSTRATE-BINDING PERIPLASMIC PROTEIN                             | IV.D                               |        |
| RSc2245 | RS01314 |       |      |       |      |       |       |       | ABC TRANSPORTER ATP-BINDING PROTEIN                                                     | IV.D                                      |                                                                                   |                                    |        |
| RSc2246 | RS01313 |       |      |       |      |       |       |       | ABC TRANSPORTER ATP-BINDING PROTEIN                                                     | IV.D                                      |                                                                                   |                                    |        |
| RSc2247 | RS01312 |       |      |       |      | -0.57 | 0.03  |       | ABC TRANSPORTER TRANSMEMBRANE PROTEIN                                                   | IV.D                                      |                                                                                   |                                    |        |
| RSc2248 | RS01311 |       |      |       |      |       |       |       | ABC TRANSPORTER TRANSMEMBRANE PROTEIN                                                   | IV.D                                      |                                                                                   |                                    |        |
| RSc2249 | RS01310 |       |      |       |      | -0.94 | 0.00  | -0.99 | 0.01                                                                                    | pcaC                                      | 4-CARBOXYMUCONOLACTONE DECARBOXYLASE                                              | II.A                               |        |
| RSc2250 | RS01309 |       |      |       |      | -0.49 | 0.00  |       | TRANSMEMBRANE B-KETOADIPATE ENOL-LACTONE HYDROLASE                                      | II.A                                      |                                                                                   |                                    |        |
| RSc2251 | RS01308 |       |      | 0.46  | 0.01 | -0.50 | 0.02  | -0.88 | 0.03                                                                                    | pcaB                                      | 3-CARBOXY-CIS,CIS-MUCONATE CYCLOISOMERASE                                         | II.A                               |        |
| RSc2252 | RS01307 |       |      |       |      |       |       |       | BETA-KETOADIPYL COA THIOLEASE                                                           | II.A                                      |                                                                                   |                                    |        |
| RSc2253 | RS01306 |       |      |       |      | -0.70 | 0.01  | -1.13 | 0.00                                                                                    | pcaJ                                      | 3-OXOADIPATE COA-TRANSFERASE SUBUNIT B                                            | II.A                               |        |
| RSc2254 | RS01305 |       |      |       |      | -0.53 | 0.00  | -0.96 | 0.02                                                                                    | pcaI                                      | 3-OXOADIPATE COA-TRANSFERASE SUBUNIT A                                            | II.A                               |        |
| RSc2255 | RS01304 |       |      |       |      | -0.58 | 0.01  | -0.69 | 0.04                                                                                    |                                           | TRANSCRIPTION REGULATOR                                                           | V.I.A                              |        |
| RSc2256 | RS01303 |       |      |       |      | -1.00 | 0.00  |       |                                                                                         |                                           | SIGNAL PEPTIDE                                                                    | V.I.C                              |        |
| RSc2257 | RS01302 | -0.36 | 0.05 |       |      | -0.90 | 0.00  | -1.01 | 0.00                                                                                    |                                           | ABC TRANSPORTER AMINO-ACID-BINDING PERIPLASMIC PROTEIN                            | IV.D.2                             |        |
| RSc2258 | RS01301 |       |      |       |      |       |       |       |                                                                                         |                                           | ABC TRANSPORTER AMINO ACID TRANSMEMBRANE PROTEIN                                  | IV.D.2                             |        |
| RSc2259 | RS01300 |       |      | 0.75  | 0.00 |       |       | -1.06 | 0.02                                                                                    |                                           | ABC TRANSPORTER AMINO ACID TRANSMEMBRANE PROTEIN                                  | IV.D.2                             |        |
| RSc2260 | RS01299 |       |      |       |      | -0.60 | 0.00  |       |                                                                                         |                                           | ABC TRANSPORTER AMINO-ACID ATP-BINDING PROTEIN                                    | IV.D.2                             |        |
| RSc2261 | RS01298 |       |      |       |      | -0.48 | 0.00  |       |                                                                                         |                                           | ABC TRANSPORTER AMINO-ACID-BINDING PERIPLASMIC PROTEIN (PBP)                      | IV.D.2                             |        |
| RSc2262 | RS01297 |       |      |       |      | -0.71 | 0.02  |       |                                                                                         |                                           | OXIDOREDUCTASE TRANSMEMBRANE D-AMINO ACID DEHYDROGENASE (SM)                      | II.3                               |        |
| RSc2263 | RS01296 |       |      |       |      | -0.67 | 0.04  |       |                                                                                         |                                           | LIPOPROTEIN                                                                       | V.I.C                              |        |
| RSc2264 | RS01295 |       |      |       |      |       |       | -1.57 | 0.02                                                                                    |                                           | LIPOPROTEIN                                                                       | V.I.D                              |        |
| RSc2267 | RS01292 |       |      |       |      | -0.42 | 0.02  | -0.68 | 0.02                                                                                    | SRso8                                     | ISRS08-TRANSPOSASE ORFB                                                           | V.A                                |        |
| RSc2268 | RS01291 |       |      |       |      |       |       |       |                                                                                         | TISRS0_                                   | ISRS08-TRANSPOSASE ORFA                                                           | V.A                                |        |
| RSc2269 | RS01290 |       |      |       |      |       |       | 1.19  | 0.02                                                                                    |                                           | SIGNAL PEPTIDE                                                                    | V.I.D                              |        |
| RSc2270 | RS01289 |       |      | 0.43  | 0.04 | -0.41 | 0.02  |       |                                                                                         | ragG                                      | TRANSMEMBRANE POLYSACCHARIDE SYNTHASE                                             | III.A.1                            |        |
| RSc2271 | RS01288 |       |      | 0.59  | 0.01 | -0.61 | 0.00  |       |                                                                                         | ragF                                      | GLYCOSYL-TRANSFERASE                                                              | III.A.1                            |        |
| RSc2272 | RS01287 |       |      | 0.32  | 0.01 | -0.50 | 0.00  | -0.65 | 0.01                                                                                    | ragE                                      | TRANSMEMBRANE POLYSACCHARIDE TRANSPORT SYSTEM COMPONENT                           | III.A.1                            |        |
| RSc2273 | RS01286 |       |      |       |      |       |       | -0.88 | 0.01                                                                                    | ragD                                      | TRANSMEMBRANE POLYSACCHARIDE TRANSPORT SYSTEM COMPONENT                           | III.A.1                            |        |



|         |         |  |       |       |       |       |       |      |       |                                                                                      |                                                                                                |                                            |       |
|---------|---------|--|-------|-------|-------|-------|-------|------|-------|--------------------------------------------------------------------------------------|------------------------------------------------------------------------------------------------|--------------------------------------------|-------|
| RSc2274 | RS01284 |  |       | -0.59 | 0.04  | -0.59 | 0.02  |      | ragC  | OUTER MEMBRANE LIPOPROTEIN                                                           | III.A.1                                                                                        |                                            |       |
| RSc2275 | RS01283 |  | 1.07  | 0.01  | -0.52 | 0.02  |       |      | ragB  | SIGNAL PEPTIDE POLYSACCHARIDE TRANSPORT SYSTEM COMPONENT                             | III.A.1                                                                                        |                                            |       |
| RSc2276 | RS01282 |  |       |       | -0.86 | 0.01  |       |      | ragA  | SIGNAL PEPTIDE POLYSACCHARIDE TRANSPORT SYSTEM COMPONENT                             | III.A.1                                                                                        |                                            |       |
| RSc2277 | RS01281 |  | 1.11  | 0.00  | -0.62 | 0.01  |       |      |       | TRANSMEMBRANE                                                                        | V.I.C                                                                                          |                                            |       |
| RSc2278 | RS01280 |  |       |       | -0.81 | 0.01  |       |      |       | HYPOTHETICAL PROTEIN                                                                 | V.I.D                                                                                          |                                            |       |
| RSc2279 | RS01279 |  |       |       | -0.69 | 0.00  |       |      |       | SIGNAL PEPTIDE                                                                       | V.I.D                                                                                          |                                            |       |
| RSc2280 | RS01277 |  |       |       | -0.98 | 0.01  |       | 1.11 | 0.01  | SIGNAL PEPTIDE                                                                       | V.I.C                                                                                          |                                            |       |
| RSc2281 | RS01276 |  | 0.81  | 0.00  |       |       |       |      |       | TRANSMEMBRANE                                                                        | V.I.D                                                                                          |                                            |       |
| RSc2282 | RS01275 |  | -1.64 | 0.04  | -0.25 | 0.04  | 2.29  | 0.02 |       | HYPOTHETICAL PROTEIN                                                                 | V.I.D                                                                                          |                                            |       |
| RSc2283 | RS01274 |  |       |       | -0.30 | 0.05  | 0.54  | 0.01 |       | HYPOTHETICAL PROTEIN                                                                 | V.I.D                                                                                          |                                            |       |
| RSc2284 | RS01272 |  | 0.49  | 0.05  |       |       | 0.90  | 0.04 |       | TRANSMEMBRANE COG3713, Outer membrane protein V - related protein                    | III.B.2                                                                                        |                                            |       |
| RSc2285 | RS01271 |  | -3.43 | 0.00  | -0.91 | 0.00  | 3.34  | 0.00 |       | SIGNAL PEPTIDE                                                                       | V.I.C                                                                                          |                                            |       |
| RSc2286 | RS01270 |  | -3.06 | 0.00  | -0.65 | 0.01  | 2.22  | 0.00 |       | CONSERVED HYPOTHETICAL PROTEIN                                                       | V.I.C                                                                                          |                                            |       |
| RSc2287 | RS01269 |  |       |       |       |       |       |      |       | COG0526, Thiol-disulfide isomerase and thioredoxins                                  | II.B.7                                                                                         |                                            |       |
| RSc2288 | RS01268 |  |       |       | -0.72 | 0.00  |       |      |       | CONSERVED HYPOTHETICAL PROTEIN                                                       | V.I.C                                                                                          |                                            |       |
| RSc2289 | RS01267 |  |       |       |       |       |       | 1.42 | 0.01  | CYTOCHROME C1 PRECURSOR                                                              | I.G.1                                                                                          |                                            |       |
| RSc2290 | RS01265 |  |       |       |       |       |       |      |       | OXIDOREDUCTASE IRON OXIDASE PRECURSOR                                                | I.G.1                                                                                          |                                            |       |
| RSc2291 | RS01264 |  |       |       | -2.30 | 0.00  | -0.93 | 0.01 |       | TRANSGLYCOSYLASE                                                                     | V.I.C                                                                                          |                                            |       |
| RSc2292 | RS01263 |  |       |       |       |       | -0.66 | 0.01 |       | TRANSMEMBRANE                                                                        | V.I.C                                                                                          |                                            |       |
| RSc2293 | RS01262 |  |       |       |       |       |       |      |       | CONSERVED HYPOTHETICAL PROTEIN                                                       | V.I.C                                                                                          |                                            |       |
| RSc2294 | RS01261 |  |       |       |       |       | -0.91 | 0.02 |       | CONSERVED HYPOTHETICAL PROTEIN                                                       | V.I.C                                                                                          |                                            |       |
| RSc2295 | RS01259 |  |       |       |       |       | -0.84 | 0.02 |       | SIGNAL PEPTIDE HYPOTHETICAL PROTEIN                                                  | V.I.C                                                                                          |                                            |       |
| RSc2296 | RS01258 |  |       |       |       |       |       |      |       | TRANSMEMBRANE                                                                        | V.I.C                                                                                          |                                            |       |
| RSc2297 | RS01257 |  |       |       | -0.89 | 0.01  | 1.03  | 0.00 |       | SIGNAL PEPTIDE                                                                       | V.I.C                                                                                          |                                            |       |
| RSc2298 | RS01256 |  |       |       |       |       |       |      |       | SIGNAL PEPTIDE COG2132, Multicopper oxidases                                         | I                                                                                              |                                            |       |
| RSc2299 | RS01255 |  |       |       |       |       |       |      |       | SIGNAL PEPTIDE COG2132, Multicopper oxidases                                         | I                                                                                              |                                            |       |
| RSc2300 | RS01254 |  | 0.48  | 0.04  |       |       |       |      |       | SIGNAL PEPTIDE COG165, Type II secretory pathway, pseudopilin PulG - related protein | III.A.2                                                                                        |                                            |       |
| RSc2301 | RS01252 |  |       |       |       |       |       |      |       | COG165, Type II secretory pathway, pseudopilin PulG - related protein                | III.A.2                                                                                        |                                            |       |
| RSc2302 | RS01251 |  |       |       |       |       |       |      |       | SIGNAL PEPTIDE COG165, Type II secretory pathway, pseudopilin PulG - related protein | III.A.2                                                                                        |                                            |       |
| RSc2303 | RS01250 |  |       |       |       |       |       |      |       | Type II secretory pathway, GSPD-RELATED PROTEIN                                      | III.A.2                                                                                        |                                            |       |
| RSc2304 | RS01248 |  |       |       | -0.80 | 0.04  |       |      |       | TRANSMEMBRANE PROLINE RICH PROTEIN                                                   | V.I.C                                                                                          |                                            |       |
| RSc2305 | RS01247 |  |       |       |       |       |       |      |       | TRANSMEMBRANE                                                                        | V.I.C                                                                                          |                                            |       |
| RSc2306 | RS01246 |  |       |       |       |       |       |      |       | TRANSMEMBRANE                                                                        | V.I.C                                                                                          |                                            |       |
| RSc2307 | RS01245 |  |       |       |       |       |       |      |       | SIGNAL PEPTIDE                                                                       | V.I.C                                                                                          |                                            |       |
| RSc2308 | RS01244 |  |       |       |       |       |       |      |       | Type II secretory pathway GSPE - RELATED PROTEIN                                     | III.A.2                                                                                        |                                            |       |
| RSc2309 | RS01243 |  |       |       |       |       |       |      |       | TRANSMEMBRANE Type II secretory pathway, GSPF-RELATED PROTEIN                        | III.A.2                                                                                        |                                            |       |
| RSc2310 | RS01241 |  |       |       |       |       | -1.15 | 0.01 |       | TRANSMEMBRANE Type II secretory pathway, pseudopilin PulG - related protein          | III.A.2                                                                                        |                                            |       |
| RSc2311 | RS01240 |  |       |       |       |       |       |      |       | TRANSCRIPTION REGULATOR TWO-COMPONENT SENSOR HISTIDINE KINASE                        | V.I.A                                                                                          |                                            |       |
| RSc2312 | RS01239 |  |       |       |       |       |       |      |       | TRANSCRIPTION REGULATOR TWO-COMPONENT RESPONSE REGULATOR                             | V.I.A                                                                                          |                                            |       |
| RSc2313 | RS01237 |  |       |       | -0.78 | 0.00  |       |      |       | TRANSPPOSASE                                                                         | V.A                                                                                            |                                            |       |
| RSc2314 | RS01236 |  |       |       | -0.66 | 0.00  |       |      | 0.65  | 0.01                                                                                 | TRANSPPOSASE                                                                                   | V.A                                        |       |
| RSc2315 | RS01234 |  |       |       | -1.24 | 0.00  | -1.00 | 0.00 |       | 1.13                                                                                 | 0.00                                                                                           | CONSERVED HYPOTHETICAL PROTEIN             | V.I.C |
| RSc2316 | RS01233 |  |       |       |       |       |       |      |       |                                                                                      | TRANSMEMBRANE DRUG TRANSPORT PROTEIN                                                           | I.V.D                                      |       |
| RSc2317 | RS01232 |  |       |       | -0.96 | 0.01  |       |      |       |                                                                                      | COG3545, Esterase of the alpha/beta hydrolase fold                                             | I                                          |       |
| RSc2318 | RS01231 |  |       |       |       |       | -0.75 | 0.05 |       | 0.59                                                                                 | 0.00                                                                                           | TRANSCRIPTION REGULATOR                    | V.I.A |
| RSc2319 | RS01230 |  | 0.49  | 0.04  |       |       |       |      |       |                                                                                      | COG2267, Lysophospholipase                                                                     | I                                          |       |
| RSc2320 | RS01229 |  |       |       | -0.87 | 0.01  | -1.63 | 0.00 |       |                                                                                      | CONSERVED HYPOTHETICAL PROTEIN                                                                 | V.I.C                                      |       |
| RSc2321 | RS01228 |  |       |       | -0.53 | 0.02  | -1.15 | 0.00 |       |                                                                                      | OXIDOREDUCTASE COG0300, Short-chain dehydrogenases of various substrate specificities          | V.I.A                                      |       |
| RSc2322 | RS01227 |  |       |       | -0.94 | 0.00  |       |      |       |                                                                                      | TRANSCRIPTION REGULATOR                                                                        | V.I.A                                      |       |
| RSc2323 | RS01226 |  |       |       | -0.51 | 0.01  |       |      |       |                                                                                      | TRANSMEMBRANE TRANSPORTER PROTEIN                                                              | I.V.D                                      |       |
| RSc2324 | RS01224 |  |       |       | -0.55 | 0.03  | -1.07 | 0.04 |       |                                                                                      | TRANSMEMBRANE TRANSPORT PROTEIN                                                                | I.V.D                                      |       |
| RSc2325 | RS01223 |  |       |       | -1.17 | 0.05  | -0.43 | 0.03 |       |                                                                                      | TRANSCRIPTION REGULATOR                                                                        | V.I.A                                      |       |
| RSc2326 | RS01222 |  |       |       | -0.48 | 0.00  |       |      |       |                                                                                      | LIPOPROTEIN                                                                                    | V.I.B                                      |       |
| RSc2327 | RS01221 |  |       |       | 0.14  | 0.02  |       |      |       |                                                                                      | TRANSCRIPTION REGULATOR                                                                        | V.I.A                                      |       |
| RSc2328 | RS01220 |  | -2.78 | 0.00  | 0.57  | 0.01  |       |      |       |                                                                                      | SIGNAL PEPTIDE COG0596, Hydrolases or acyltransferases (alpha/beta hydrolase superfamily)      | V.I.C                                      |       |
| RSc2329 | RS01219 |  |       |       |       |       |       |      |       |                                                                                      | COG2249, NADPH-quinone reductase (modulator of drug activity B)                                | V.I.C                                      |       |
| RSc2330 | RS01218 |  |       |       |       |       |       |      |       |                                                                                      | HYPOTHETICAL PROTEIN                                                                           | V.I.D                                      |       |
| RSc2331 | RS01214 |  |       |       | -0.45 | 0.00  |       |      |       |                                                                                      | REMNANT OF ISRs010-TRANSPPOSASE                                                                | V.A                                        |       |
| RSc2332 | RS01210 |  |       |       | -0.53 | 0.00  |       |      |       |                                                                                      | HYPOTHETICAL PROTEIN                                                                           | V.I.D                                      |       |
| RSc2333 | RS01209 |  | 0.64  | 0.02  | -0.32 | 0.02  |       |      | 0.54  | 0.01                                                                                 | SERYL-TRNA SYNTHETASE                                                                          | II.B.6                                     |       |
| RSc2334 | RS01208 |  | 1.90  | 0.04  |       |       |       |      |       |                                                                                      | COG2256, ATPase related to the helicase subunit of the Holliday junction resolvase             | II.B.8                                     |       |
| RSc2335 | RS01207 |  |       |       | -0.30 | 0.03  |       |      | 1.13  | 0.01                                                                                 | TRANSMEMBRANE LIPOPROTEIN                                                                      | V.I.C                                      |       |
| RSc2336 | RS01206 |  |       |       | -0.67 | 0.00  | -0.66 | 0.01 |       | 1.15                                                                                 | 0.00                                                                                           | SIGNAL PEPTIDE PERIPLASMIC CARRIER PROTEIN | I.V.D |
| RSc2337 | RS01205 |  |       |       |       |       |       |      |       |                                                                                      | TRANSMEMBRANE CELL DIVISION PROTEIN FTSK                                                       | I.V.A                                      |       |
| RSc2338 | RS01204 |  | 0.38  | 0.01  | -0.51 | 0.02  |       |      |       |                                                                                      | OXIDOREDUCTASE THIOREDOXIN REDUCTASE                                                           | I.F.2                                      |       |
| RSc2339 | RS01203 |  |       |       |       |       |       |      |       |                                                                                      | CONSERVED HYPOTHETICAL PROTEIN                                                                 | V.I.C                                      |       |
| RSc2340 | RS01202 |  |       |       |       |       | -0.86 | 0.03 |       |                                                                                      | TRANSMEMBRANE                                                                                  | V.I.C                                      |       |
| RSc2341 | RS01201 |  |       |       | -0.36 | 0.02  |       |      |       |                                                                                      | TRANSCRIPTION REGULATOR NITROGEN REGULATORY PROTEIN P-II                                       | I.A.18                                     |       |
| RSc2342 | RS01200 |  | 0.52  | 0.01  |       |       |       |      | 1.01  | 0.00                                                                                 | COG2226, Methylase involved in ubiquinone/menaquinone biosynthesis                             | V.I.B                                      |       |
| RSc2343 | RS01199 |  |       |       |       |       |       |      |       |                                                                                      | SIGNAL PEPTIDE NH3-DEPENDENT NAD+ SYNTHETASE                                                   | I.B.9                                      |       |
| RSc2344 | RS01198 |  |       |       |       |       |       |      |       |                                                                                      | CONSERVED HYPOTHETICAL PROTEIN                                                                 | V.I.C                                      |       |
| RSc2345 | RS01197 |  |       |       |       |       |       |      |       |                                                                                      | INORGANIC PYROPHOSPHATASE                                                                      | I.F                                        |       |
| RSc2346 | RS01196 |  |       |       |       |       |       |      |       |                                                                                      | OXIDOREDUCTASE ALDEHYDE DEHYDROGENASE                                                          | I.H                                        |       |
| RSc2347 | RS01195 |  | 0.44  | 0.05  |       |       |       |      | 1.04  | 0.03                                                                                 | OXIDOREDUCTASE TOLUENESULFONATE ZINC-INDEPENDENT ALCOHOL DEHYDROGENASE                         | I.H.1                                      |       |
| RSc2348 | RS01194 |  |       |       |       |       | -0.72 | 0.01 | -0.83 | 0.04                                                                                 |                                                                                                | TRANSMEMBRANE PERMEASE                     | I.V.D |
| RSc2349 | RS01193 |  |       |       |       |       |       |      |       |                                                                                      | SIGNAL PEPTIDE                                                                                 | V.I.C                                      |       |
| RSc2350 | RS01192 |  |       |       |       |       |       |      |       |                                                                                      | OXIDOREDUCTASE CYTOCHROME B                                                                    | I.G                                        |       |
| RSc2351 | RS01191 |  |       |       |       |       |       |      |       |                                                                                      | PROTEIN PORPHYRIN BIOSYNTHESIS                                                                 | I.B.4                                      |       |
| RSc2352 | RS01190 |  | 0.46  | 0.02  | -0.36 | 0.00  | 0.59  | 0.01 | 1.00  | 0.01                                                                                 | TRANSMEMBRANE BIFUNCTIONAL PROTEIN: UROPORPHYRIN-III C-METHYLTRANSFERASE                       | I.B.4                                      |       |
| RSc2353 | RS01189 |  | 0.51  | 0.02  |       |       |       |      |       |                                                                                      | PORPHOBILINOGEN DEAMINASE                                                                      | I.B.4                                      |       |
| RSc2354 | RS01188 |  |       |       |       |       |       |      |       |                                                                                      | PHOSPHOENOLPYRUVATE CARBOXYLASE                                                                | I.H                                        |       |
| RSc2355 | RS01187 |  |       |       | -4.01 | 0.00  | 3.95  | 0.00 | 2.61  | 0.00                                                                                 |                                                                                                | HYPOTHETICAL PROTEIN                       | V.I.D |
| RSc2356 | RS01186 |  |       |       |       |       |       |      |       |                                                                                      | CONSERVED HYPOTHETICAL PROTEIN                                                                 | V.I.C                                      |       |
| RSc2357 | RS01185 |  |       |       | -1.02 | 0.00  | -0.75 | 0.00 |       |                                                                                      | TRANSCRIPTION REGULATOR RNA POLYMERASE SIGMA-E FACTOR SIGMA-24                                 | I.E.1                                      |       |
| RSc2358 | RS01184 |  |       |       |       |       |       |      |       |                                                                                      | TRANSMEMBRANE                                                                                  | V.I.C                                      |       |
| RSc2359 | RS01183 |  |       |       |       |       |       |      |       |                                                                                      | ARGININOSUCCINATE LYASE                                                                        | I.A.17                                     |       |
| RSc2360 | RS01182 |  |       |       |       |       |       |      |       |                                                                                      | 2H PHOSPHOESTERASE (2'-5' RNA LIGASE)                                                          | II.B.6                                     |       |
| RSc2361 | RS01181 |  | 0.80  | 0.00  |       |       |       |      |       |                                                                                      | BIODEGRADATIVE ARGININE DECARBOXYLASE                                                          | I.I.3                                      |       |
| RSc2362 | RS01180 |  |       |       | -0.25 | 0.02  | 0.21  | 0.03 |       |                                                                                      | DEOXYCYTIDINE TRIPHOSPHATE DEAMINASE                                                           | I.F.2                                      |       |
| RSc2363 | RS01179 |  |       |       |       |       |       |      |       |                                                                                      | FDHD PROTEIN HOMOLOG                                                                           | I.H.2                                      |       |
| RSc2364 | RS01178 |  |       |       |       |       |       |      |       |                                                                                      | SUPEROXIDE DISMUTASE CU-ZN PRECURSOR                                                           | I.V.G.4                                    |       |
| RSc2365 | RS01177 |  |       |       |       |       |       |      |       |                                                                                      | SIGNAL PEPTIDE                                                                                 | V.I.D                                      |       |
| RSc2366 | RS01176 |  |       |       |       |       |       |      |       |                                                                                      | TRANSMEMBRANE COG2864, Cytochrome B subunit of formate dehydrogenase                           | I                                          |       |
| RSc2367 | RS01175 |  |       |       |       |       |       |      |       |                                                                                      | lipoprotein                                                                                    | V.I.C                                      |       |
| RSc2368 | RS01174 |  | -0.34 | 0.03  |       |       |       |      |       |                                                                                      | OXIDOREDUCTASE FORMATE DEHYDROGENASE (IRON-SULFUR SUBUNIT)                                     | I.H.2                                      |       |
| RSc2369 | RS01173 |  |       |       |       |       |       |      |       |                                                                                      | OXIDOREDUCTASE FORMATE DEHYDROGENASE (LARGE SUBUNIT)                                           | I.H.2                                      |       |
| RSc2370 | RS01172 |  | 1.66  | 0.02  | -2.69 | 0.00  | -2.17 | 0.01 | 0.77  | 0.01                                                                                 | TRANSMEMBRANE                                                                                  | V.I.D                                      |       |
| RSc2371 | RS01171 |  |       |       | -0.68 | 0.02  |       |      |       |                                                                                      | CONSERVED HYPOTHETICAL PROTEIN                                                                 | V.I.C                                      |       |
| RSc2372 | RS01170 |  |       |       | -2.94 | 0.00  | 2.65  | 0.00 | 4.70  | 0.00                                                                                 |                                                                                                | FERREDOXIN                                 | I     |
| RSc2373 | RS01168 |  |       |       | -0.63 | 0.00  |       |      |       |                                                                                      | PROLINE RICH PROTEIN                                                                           | V.I.C                                      |       |
| RSc2374 | RS01167 |  |       |       | -0.42 | 0.02  |       |      |       |                                                                                      | CONSERVED HYPOTHETICAL PROTEIN                                                                 | V.I.C                                      |       |
| RSc2375 | RS01166 |  |       |       |       |       |       |      |       |                                                                                      | MRP ATPase involved in chromosome partitioning                                                 | I.V.A                                      |       |
| RSc2376 | RS01165 |  |       |       | -0.43 | 0.00  |       |      |       |                                                                                      | TRANSMEMBRANE COG2885, Outer membrane protein and related peptidoglycan-associated lipoprotein | III.B.2                                    |       |
| RSc2377 | RS01164 |  | 0.63  | 0.04  | -0.42 | 0.00  |       |      |       |                                                                                      | METHIONYL-tRNA SYNTHETASE                                                                      | III.D.1                                    |       |
| RSc2378 | RS01163 |  | 0.41  | 0.05  | -0.54 | 0.01  |       |      |       |                                                                                      | LIPOPROTEIN                                                                                    | V.I.C                                      |       |
| RSc2379 | RS02766 |  | 0.55  | 0.03  | -0.44 | 0.03  |       |      |       |                                                                                      | COG0729, Outer membrane protein                                                                | III.B.2                                    |       |
| RSc2380 | RS02765 |  |       |       |       |       |       |      |       |                                                                                      | CONSERVED HYPOTHETICAL PROTEIN                                                                 | V.I.C                                      |       |
| RSc2381 | RS02764 |  |       |       | -0.24 | 0.02  | 1.26  | 0.00 | 1.59  | 0.01                                                                                 | CONSERVED HYPOTHETICAL PROTEIN                                                                 | V.I.C                                      |       |
| RSc2382 | RS02763 |  | 0.57  | 0.05  |       |       | 0.46  | 0.04 |       |                                                                                      | PANTOATE-BETA-ALANINE LIGASE                                                                   | I.B.11                                     |       |
| RSc2383 | RS02761 |  |       |       | -0.33 | 0.00  |       |      |       |                                                                                      | CONSERVED HYPOTHETICAL PROTEIN                                                                 | V.I.C                                      |       |
| RSc2384 | RS02760 |  |       |       |       |       |       |      | 1.12  | 0.00                                                                                 | PARTITION-RELATED PROTEIN                                                                      | V.B                                        |       |
| RSc2385 | RS02759 |  |       |       |       |       |       |      | 0.56  | 0.00                                                                                 | COBYRIC ACID SYNTHASE                                                                          | I.B.3                                      |       |

|         |         |  |       |       |      |       |      |       |         |                                                                                |               |
|---------|---------|--|-------|-------|------|-------|------|-------|---------|--------------------------------------------------------------------------------|---------------|
| RSc2391 | RS02758 |  |       | -0.58 | 0.00 |       |      |       | cobP    | COBALAMIN BIOSYNTHESIS BIFUNCTIONAL PROTEIN: COBINAMIDE KINASE AII.B.3         |               |
| RSc2392 | RS02743 |  |       |       |      |       |      |       | cobD    | TRANSMEMBRANE COBALAMIN BIOSYNTHESIS PROTEIN COBD                              |               |
| RSc2393 | RS02729 |  | 1.03  | 0.04  |      |       |      |       | cobC    | COBALAMIN BIOSYNTHESIS PROTEIN PYRIDOXAL-PHOSPHATE-DEPENDENT                   |               |
| RSc2394 | RS02728 |  |       |       |      | -0.61 | 0.03 |       |         | ABC TRANSPORTER ABC-TYPE TRANSPORTER, PERIPLASMIC COMPONENT                    |               |
| RSc2395 | RS02727 |  |       |       |      |       |      |       | gpmB    | COG0406, Fructose-2,6-bisphosphatase                                           |               |
| RSc2396 | RS02726 |  | 0.90  | 0.00  |      |       | 0.87 | 0.04  | cobS    | TRANSMEMBRANE COBALAMIN 5'-PHOSPHATE SYNTHASE EC 2.---                         |               |
| RSc2397 | RS02725 |  |       |       |      |       |      |       | cobU    | TRANSMEMBRANE NICOTINATE-NUCLEOTIDE--DIMETHYLBENZIMIDAZOLE PHC                 |               |
| RSc2398 | RS02720 |  |       |       | 0.79 | 0.00  | 1.07 | 0.03  |         | ABC TRANSPORTER ATP-BINDING PROTEIN                                            |               |
| RSc2399 | RS02719 |  |       |       |      |       |      |       |         | ABC TRANSPORTER TRANSMEMBRANE PROTEIN                                          |               |
| RSc2400 | RS02718 |  | 1.23  | 0.05  |      |       |      |       |         | TONB-DEPENDENT RECEPTOR PROTEIN                                                |               |
| RSc2401 | RS02717 |  | 0.92  | 0.00  |      | -0.31 | 0.02 |       |         | CONSERVED HYPOTHETICAL PROTEIN                                                 |               |
| RSc2402 | RS02716 |  |       |       |      | -0.46 | 0.03 | 0.86  | 0.01    | CONSERVED HYPOTHETICAL PROTEIN                                                 |               |
| RSc2403 | RS02715 |  |       |       |      | -0.53 | 0.01 | 0.83  | 0.00    | CONSERVED HYPOTHETICAL PROTEIN                                                 |               |
| RSc2404 | RS05747 |  | 0.32  | 0.02  |      | -0.33 | 0.02 |       |         | CONSERVED HYPOTHETICAL PROTEIN                                                 |               |
| RSc2406 | RS02787 |  |       |       |      | -1.60 | 0.00 | -1.62 | 0.00    | SIGNAL PEPTIDE HYPOTHETICAL                                                    |               |
| RSc2407 | RS05754 |  |       |       |      | -0.60 | 0.00 |       | ISRso14 | ISRso14-TRANSPOSASE ORFA                                                       |               |
| RSc2410 | RS02708 |  |       |       |      | -0.75 | 0.00 |       |         | HYPOTHETICAL PROTEIN                                                           |               |
| RSc2411 | RS02707 |  | 0.27  | 0.04  |      | -0.28 | 0.04 | 0.68  | 0.05    | TRANSMEMBRANE PROLIPOPROTEIN DIACYLGLYCERYL TRANSFERASE                        |               |
| RSc2412 | RS02706 |  |       |       |      | -0.60 | 0.00 | -1.37 | 0.01    | TRANSCRIPTION REGULATOR                                                        |               |
| RSc2413 | RS02702 |  |       |       |      |       |      |       | ivd     | DIHYDROXY-ACID DEHYDRATASE                                                     |               |
| RSc2414 | RS02701 |  | 0.45  | 0.02  |      | -0.38 | 0.02 | 1.05  | 0.00    | HYPOTHETICAL PROTEIN                                                           |               |
| RSc2415 | RS02700 |  |       |       |      | -0.35 | 0.01 | 1.35  | 0.02    | DNA POLYMERASE III (CHI SUBUNIT)                                               |               |
| RSc2416 | RS02698 |  | 0.76  | 0.01  |      | -0.37 | 0.02 |       | pepA    | CYTOSOL AMINOPEPTIDASE                                                         |               |
| RSc2417 | RS02697 |  | 0.76  | 0.05  |      |       |      |       |         | TRANSMEMBRANE COG0795, Permease                                                |               |
| RSc2418 | RS02695 |  |       |       |      | -0.67 | 0.02 |       |         | TRANSMEMBRANE COG0795, Permease                                                |               |
| RSc2419 | RS02694 |  |       |       |      |       |      |       |         | CONSERVED HYPOTHETICAL PROTEIN                                                 |               |
| RSc2420 | RS02693 |  |       |       |      |       |      |       | hpaF    | 5-CARBOXYMETHYL-2-HYDROXYMUCONATE DELTA-ISOMERASE                              |               |
| RSc2421 | RS02692 |  | 0.89  | 0.02  |      | 0.58  | 0.03 | 0.60  | 0.00    | UROPORPHYRINOGEN-III C-METHYLTRANSFERASE                                       |               |
| RSc2422 | RS02690 |  | 0.92  | 0.00  |      | 0.68  | 0.00 | -1.36 | 0.04    | SULFATE ADENYLYLTRANSFERASE SUBUNIT 1                                          |               |
| RSc2423 | RS02689 |  |       |       |      |       |      | -0.78 | 0.00    | SULFATE ADENYLYLTRANSFERASE SUBUNIT 2                                          |               |
| RSc2424 | RS02687 |  |       |       |      |       |      | 0.88  | 0.00    | 5' ADENYLYLSULFATE APS REDUCTASE                                               |               |
| RSc2425 | RS02684 |  |       |       |      | 1.07  | 0.00 |       | cysH    | CONSERVED HYPOTHETICAL PROTEIN                                                 |               |
| RSc2426 | RS02683 |  | 0.35  | 0.02  |      |       |      | -1.50 | 0.00    | OXIDOREDUCTASE SULFITE REDUCTASE                                               |               |
| RSc2427 | RS02682 |  |       |       |      | -0.35 | 0.01 |       | cysI1   | TRANSMEMBRANE COG0730, Permease                                                |               |
| RSc2428 | RS02680 |  |       |       |      | 0.52  | 0.00 | -0.46 | 0.05    | TRANSCRIPTION REGULATOR CYS REGULON TRANSCRIPTIONAL ACTIVATOR                  |               |
| RSc2429 | RS02679 |  | 0.59  | 0.02  |      | -0.46 | 0.00 |       | cysB2   | ABC TRANSPORTER AMINO ACID-BINDING PERIPLASMIC PROTEIN (PBP)                   |               |
| RSc2430 | RS02678 |  |       |       |      |       |      |       |         | OXIDOREDUCTASE COG2084, 3-hydroxyisobutyrate dehydrogenase and related bet     |               |
| RSc2431 | RS02676 |  |       |       |      |       |      |       |         | TRANSCRIPTION REGULATOR                                                        |               |
| RSc2432 | RS02675 |  |       |       |      | -0.60 | 0.00 | -0.76 | 0.03    | TRANSMEMBRANE COG0038, Chloride channel protein                                |               |
| RSc2433 | RS02671 |  |       |       |      | -0.72 | 0.03 | -0.98 | 0.02    | TRANSMEMBRANE SIGNAL TRANSDUCTION PROTEIN GGDEF DOMAIN                         |               |
| RSc2434 | RS02670 |  | 0.55  | 0.00  |      |       |      |       |         | COG0451, Nucleoside-diphosphate-sugar epimerase                                |               |
| RSc2435 | RS02668 |  | 0.75  | 0.00  |      | -0.50 | 0.01 |       | argM    | OXIDOREDUCTASE REDUCTASE                                                       |               |
| RSc2436 | RS02667 |  | 1.40  | 0.00  |      | -0.59 | 0.00 | -0.60 | 0.00    | SUCCINYLORNITHINE TRANSAMINASE AND ACETYLORNITHINE AMINOTRANS                  |               |
| RSc2437 | RS02666 |  | 0.92  | 0.00  |      | -0.41 | 0.03 |       |         | ACETYLTRANSFERASE                                                              |               |
| RSc2438 | RS02664 |  | 0.90  | 0.00  |      | -0.44 | 0.04 |       |         | ABC TRANSPORTER AMINO ACID ATP-BINDING PROTEIN                                 |               |
| RSc2439 | RS02663 |  | 0.78  | 0.01  |      |       |      |       |         | ABC TRANSPORTER AMINO ACID ATP-BINDING PROTEIN                                 |               |
| RSc2440 | RS01355 |  | 0.72  | 0.00  |      |       |      | -1.34 | 0.01    | ABC TRANSPORTER AMINO-ACID TRANSMEMBRANE PROTEIN                               |               |
| RSc2441 | RS01353 |  | 0.88  | 0.01  |      |       |      |       | livH2   | ABC TRANSPORTER AMINO-ACID TRANSMEMBRANE PROTEIN                               |               |
| RSc2442 | RS01352 |  | 1.58  | 0.01  |      |       |      |       |         | ABC TRANSPORTER AMINO ACID-BINDING PERIPLASMIC PROTEIN                         |               |
| RSc2443 | RS01351 |  |       |       |      | -0.60 | 0.00 |       | lytB    | LYTB PROTEIN                                                                   |               |
| RSc2444 | RS01350 |  |       |       |      | -0.30 | 0.01 |       | fkpB    | FKBP-TYPE 16 KDA PEPTIDYL-PROLYL CIS-TRANS ISOMERASE                           |               |
| RSc2445 | RS01349 |  |       |       |      | -0.32 | 0.00 | -0.35 | 0.00    | DNA REPAIR PROTEIN RADC                                                        |               |
| RSc2446 | RS01348 |  |       |       |      | -0.18 | 0.03 | -0.24 | 0.01    | 50S RIBOSOMAL SUBUNIT PROTEIN L28                                              |               |
| RSc2447 | RS01159 |  | 0.69  | 0.04  |      |       |      | -0.72 | 0.01    | 50S RIBOSOMAL SUBUNIT PROTEIN L33                                              |               |
| RSc2448 | RS01158 |  |       |       |      |       |      |       | rpmG    | OXIDOREDUCTASE L-ASPARTATE OXIDASE (QUINOLINATE SYNTHETASE B)                  |               |
| RSc2449 | RS01157 |  |       |       |      | -0.35 | 0.00 |       | nadB1   | NICOTINATE-NUCLEOTIDE PYROPHOSPHORYLASE (CARBOXYLATING) QUINO                  |               |
| RSc2450 | RS01156 |  |       |       |      | -0.58 | 0.01 |       | nadA    | QUINOLINATE SYNTHETASE A                                                       |               |
| RSc2451 | RS01155 |  |       |       |      | -0.40 | 0.01 |       |         | OXIDOREDUCTASE STEAROYL-COA DESATURASE                                         |               |
| RSc2452 | RS01154 |  |       |       |      | -0.33 | 0.00 |       |         | TRANSMEMBRANE COG3264, Small-conductance mechanosensitive channel              |               |
| RSc2453 | RS01153 |  |       |       |      | -0.48 | 0.04 |       |         | ENDONUCLEASE                                                                   |               |
| RSc2454 | RS01151 |  | 0.48  | 0.04  |      |       |      |       | purN    | COG0144, tRNA and rRNA cytosine-C5-methylase                                   |               |
| RSc2455 | RS01150 |  |       |       |      | -0.61 | 0.00 |       |         | PHOSPHORIBOSYLGLYCINAMIDE FORMYLTRANSFERASE                                    |               |
| RSc2456 | RS01149 |  |       |       |      | -0.22 | 0.05 |       | vsrC    | TRANSCRIPTION REGULATOR RESPONSE REGULATOR VSRC                                |               |
| RSc2457 | RS01148 |  |       |       |      | -0.34 | 0.00 |       | vsrB    | TRANSCRIPTION REGULATOR COMPOSITE TWO-COMPONENT REGULATORY                     |               |
| RSc2458 | RS01147 |  |       |       |      |       |      |       | ribF    | RIBOFLAVIN BIOSYNTHESIS PROTEIN                                                |               |
| RSc2459 | RS01146 |  |       |       |      |       |      |       | ileS    | ISOLEUCYL-TRNA SYNTHETASE                                                      |               |
| RSc2460 | RS01145 |  |       |       |      | -0.64 | 0.01 |       | ispA    | LIPOPROTEIN SIGNAL PEPTIDASE                                                   |               |
| RSc2461 | RS01144 |  |       |       |      | -0.46 | 0.01 |       |         | TRANSMEMBRANE                                                                  |               |
| RSc2462 | RS01143 |  |       |       |      | -0.52 | 0.00 |       | dfp     | DNA/PANTOTHENATE METABOLISM FLAVOPROTEIN FLAVOPROTEIN                          |               |
| RSc2463 | RS01142 |  |       |       |      |       |      |       |         | OXIDOREDUCTASE COG2141, Coenzyme F420-dependent N5,N10-methylene tetra         |               |
| RSc2464 | RS01141 |  |       |       |      |       |      |       | dut     | DEOXYURIDINE 5'-TRIPHOSPHATE NUCLEOTIDOHYDROLASE DUTPASE                       |               |
| RSc2465 | RS01140 |  |       |       |      |       |      |       | ctpA    | ATP-DEPENDENT PROTEASE (ATP-BINDING SPECIFICITY SUBUNIT)                       |               |
| RSc2466 | RS01139 |  |       |       |      | -0.71 | 0.00 | -0.74 | 0.00    | CONSERVED HYPOTHETICAL PROTEIN                                                 |               |
| RSc2467 | RS01138 |  |       |       |      | -1.43 | 0.00 |       | cspD    | TRANSCRIPTION REGULATOR COLD SHOCK-LIKE PROTEIN CSPD                           |               |
| RSc2468 | RS01137 |  |       |       |      | -0.98 | 0.02 | -1.11 | 0.02    | TRANSMEMBRANE                                                                  |               |
| RSc2469 | RS01136 |  |       |       |      |       |      |       |         | TRANSMEMBRANE                                                                  |               |
| RSc2470 | RS01135 |  |       |       |      |       |      |       |         | HYPOTHETICAL PROTEIN                                                           |               |
| RSc2471 | RS01134 |  |       |       |      |       |      |       |         | RHS-RELATED PROTEIN                                                            |               |
| RSc2472 | RS01133 |  |       |       |      | -0.39 | 0.04 |       |         | HYPOTHETICAL PROTEIN                                                           |               |
| RSc2473 | RS01132 |  |       |       |      | -0.30 | 0.03 | -0.66 | 0.02    | TRANSMEMBRANE                                                                  |               |
| RSc2474 | RS01131 |  |       |       |      | -0.38 | 0.03 |       |         | HYPOTHETICAL PROTEIN                                                           |               |
| RSc2475 | RS01130 |  |       |       |      |       |      |       |         | HYPOTHETICAL PROTEIN                                                           |               |
| RSc2476 | RS01129 |  |       |       |      |       |      |       |         | HYPOTHETICAL PROTEIN                                                           |               |
| RSc2477 | RS01127 |  |       |       |      |       |      |       |         | BACTERIOPHAGE-RELATED PROTEIN                                                  |               |
| RSc2478 | RS01126 |  |       |       |      | -0.36 | 0.00 |       |         | PROPHAGE PROTEIN                                                               |               |
| RSc2479 | RS01124 |  |       |       |      |       |      |       |         | TRANSMEMBRANE PROPHAGE PROTEIN                                                 |               |
| RSc2480 | RS01121 |  |       |       |      | -0.29 | 0.01 |       |         | BACTERIOPHAGE-RELATED PROTEIN                                                  |               |
| RSc2481 | RS01119 |  |       |       |      | -0.22 | 0.00 |       |         | CONSERVED HYPOTHETICAL PROTEIN                                                 |               |
| RSc2482 | RS01114 |  | -0.18 | 0.02  |      | -0.48 | 0.00 |       |         | CONSERVED HYPOTHETICAL PROTEIN                                                 |               |
| RSc2483 | RS01112 |  |       |       |      |       |      |       |         | CONSERVED HYPOTHETICAL PROTEIN                                                 |               |
| RSc2484 | RS01111 |  |       |       |      |       |      |       |         | CONSERVED HYPOTHETICAL PROTEIN                                                 |               |
| RSc2485 | RS01110 |  |       |       |      | -0.83 | 0.00 |       |         | HYPOTHETICAL PROTEIN                                                           |               |
| RSc2486 | RS01109 |  |       |       |      |       |      | -0.72 | 0.00    | HYPOTHETICAL PROTEIN                                                           |               |
| RSc2487 | RS05745 |  |       |       |      | -0.43 | 0.01 | -1.13 | 0.02    | CONSERVED HYPOTHETICAL PROTEIN                                                 |               |
| RSc2488 | RS05744 |  |       |       |      | 0.74  | 0.00 |       |         | HYPOTHETICAL PROTEIN                                                           |               |
| RSc2489 | RS01107 |  | 0.53  | 0.02  |      | -0.47 | 0.00 |       |         | HYPOTHETICAL PROTEIN                                                           |               |
| RSc2490 | RS01106 |  | 0.33  | 0.01  |      | -0.20 | 0.01 | 0.45  | 0.01    | INTEGRASE                                                                      |               |
| RSc2491 | RS01105 |  |       |       |      |       |      | -0.77 | 0.01    | OXIDOREDUCTASE ISOCITRATE DEHYDROGENASE [NADP]                                 |               |
| RSc2492 | RS01104 |  |       |       |      |       |      |       | icd     | SIGNAL PEPTIDE                                                                 |               |
| RSc2493 | RS01103 |  |       |       |      |       |      |       |         | TRANSMEMBRANE                                                                  |               |
| RSc2494 | RS01102 |  | 0.41  | 0.02  |      | -0.41 | 0.01 |       |         | SIGNAL PEPTIDE COG1858, Cytochrome c peroxidase                                |               |
| RSc2495 | RS01101 |  | 0.46  | 0.03  |      | -0.61 | 0.01 | 0.12  | 0.02    | SIGNAL PEPTIDE                                                                 |               |
| RSc2496 | RS01100 |  |       |       |      | -0.74 | 0.00 |       |         | ARYLSULFATASE PRECURSOR (ARYL-SULFATE SULPHOHYDROLASE)                         |               |
| RSc2497 | RS01099 |  |       |       |      | -0.34 | 0.00 |       |         | SIGNAL PEPTIDE                                                                 |               |
| RSc2498 | RS01098 |  |       |       |      | -0.41 | 0.02 |       |         | TRANSCRIPTION REGULATOR                                                        |               |
| RSc2499 | RS01097 |  |       |       |      |       |      |       |         | TRANSCRIPTION REGULATOR                                                        |               |
| RSc2500 | RS01095 |  |       |       |      | -0.88 | 0.00 | -1.02 | 0.01    | MULTIDRUG RESISTANCE PROTEIN                                                   |               |
| RSc2501 | RS01094 |  |       |       |      |       |      |       | 0.21    | 0.01                                                                           | TRANSMEMBRANE |
| RSc2502 | RS01093 |  |       |       |      |       |      |       |         | PUTATIVE GAMMA-GLUTAMYLTRANSFERASE                                             |               |
| RSc2503 | RS01092 |  | 1.02  | 0.00  |      |       |      |       |         | TRANSMEMBRANE                                                                  |               |
| RSc2504 | RS01091 |  |       |       |      |       |      |       |         | TRANSMEMBRANE COG2321, Predicted metalloprotease                               |               |
| RSc2505 | RS05743 |  |       |       |      | -0.54 | 0.05 |       |         | OXIDOREDUCTASE COG1028, Dehydrogenases with different specificities (related t |               |
|         |         |  |       |       |      |       |      |       |         | TRANSCRIPTION REGULATOR                                                        |               |

|         |         |  |  |  |  |            |     |                                                                                  |         |
|---------|---------|--|--|--|--|------------|-----|----------------------------------------------------------------------------------|---------|
| RSc2506 | RS01080 |  |  |  |  |            | ogt | METHYLATED-DNA--PROTEIN-CYSTEINE METHYLTRANSFERASE                               | II.B.8  |
| RSc2507 | RS01075 |  |  |  |  |            |     | TRANSMEMBRANE                                                                    | VI.C    |
| RSc2508 | RS01074 |  |  |  |  | 0.44 0.05  |     | CONSERVED HYPOTHETICAL PROTEIN                                                   | VI.C    |
| RSc2509 | RS01073 |  |  |  |  | -1.53 0.00 |     | HYPOTHETICAL PROTEIN                                                             | VI.D    |
| RSc2510 | RS01072 |  |  |  |  | -1.16 0.00 |     | SIGNAL PEPTIDE COG1638, TRAP-type C4-dicarboxylate transport system, periplasmic | IV.D.3  |
| RSc2511 | RS01071 |  |  |  |  | -0.81 0.03 |     | SIGNAL PEPTIDE                                                                   | VI.B    |
| RSc2512 | RS01070 |  |  |  |  |            |     | SIGNAL PEPTIDE CYCLOHEXADIENYL DEHYDRATASE PRECURSOR                             | IA.8    |
| RSc2513 | RS01069 |  |  |  |  |            |     | HYPOTHETICAL PROTEIN                                                             | VI.D    |
| RSc2514 | RS01068 |  |  |  |  |            |     | SIGNAL PEPTIDE                                                                   | VI.C    |
| RSc2515 | RS01067 |  |  |  |  | -0.71 0.00 |     | COG2206, HD-GYP domain                                                           | VI.A    |
| RSc2516 | RS01066 |  |  |  |  | -0.99 0.00 |     | TRANSMEMBRANE ABC TYPE TRANSPORTER : PERIPLASMIC GLYCINE BETAIN                  | IV.D    |
| RSc2517 | RS01065 |  |  |  |  | -0.53 0.04 |     | TRANSMEMBRANE CONSERVED HYPOTHETICAL PROTEIN                                     | VI.C    |
| RSc2518 | RS01064 |  |  |  |  | -1.25 0.01 |     | TRANSMEMBRANE COG2610, H <sup>+</sup> /gluconate symporter and related permeases | IV.D.3  |
| RSc2519 | RS01063 |  |  |  |  | -1.45 0.00 |     | HYPOTHETICAL PROTEIN                                                             | VI.D    |
| RSc2520 | RS01062 |  |  |  |  |            |     | CONSERVED HYPOTHETICAL PROTEIN                                                   | VI.C    |
| RSc2521 | RS01061 |  |  |  |  |            |     | DNA-BINDING PROTEIN HU-BETA (NS1) (HU-1)                                         | II.C.1  |
| RSc2522 | RS01060 |  |  |  |  | 0.90 0.00  |     | CONSERVED HYPOTHETICAL PROTEIN                                                   | VI.C    |
| RSc2523 | RS01059 |  |  |  |  | -1.47 0.00 |     | TRANSMEMBRANE                                                                    | VI.C    |
| RSc2524 | RS01058 |  |  |  |  | -0.62 0.00 |     | TRANSMEMBRANE COG1994, Zn-dependent protease                                     | II.A.4  |
| RSc2525 | RS01057 |  |  |  |  | -0.70 0.01 |     | HYPOTHETICAL PROTEIN                                                             | VI.B    |
| RSc2526 | RS01055 |  |  |  |  | -1.79 0.00 |     | SUPEROXIDE DISMUTASE [FE]                                                        | IV.G.4  |
| RSc2527 | RS01054 |  |  |  |  | 0.88 0.00  |     | EXODEOXYRIBONUCLEASE VII LARGE SUBUNIT                                           | II.A.1  |
| RSc2528 | RS01053 |  |  |  |  | 0.89 0.02  |     | TRANSMEMBRANE BIOPOLYMER TRANSPORT EXBB-LIKE PROTEIN                             | IV.D    |
| RSc2529 | RS01052 |  |  |  |  | -0.60 0.01 |     | TRANSMEMBRANE BIOPOLYMER TRANSPORT EXBD-RELATED PROTEIN                          | IV.D    |
| RSc2530 | RS01051 |  |  |  |  | -0.52 0.02 |     | TETRAACYLDISACCHARIDE 4'-KINASE                                                  | II.B.2  |
| RSc2531 | RS05763 |  |  |  |  | -0.41 0.00 |     | CONSERVED HYPOTHETICAL PROTEIN                                                   | VI.C    |
| RSc2532 | RS05764 |  |  |  |  | -0.41 0.00 |     | 3-DEOXY-MANNO-OCTULOSONATE (CMP-KDO SYNTHETASE)(CKS)                             | III.A.1 |
| RSc2533 | RS05765 |  |  |  |  | -0.45 0.00 |     | ADENYLATE KINASE (ATP-AMP TRANSPHOSPHORYLASE)                                    | ID.2    |
| RSc2534 | RS05766 |  |  |  |  | -0.20 0.01 |     | OXIDOREDUCTASE 3-HYDROXYACYL-CoA DEHYDROGENASE TYPE II                           | II.1    |
| RSc2535 | RS00706 |  |  |  |  |            |     | TRANSCRIPTION REGULATOR                                                          | VI.A    |
| RSc2536 | RS00704 |  |  |  |  | -1.71 0.00 |     | OXIDOREDUCTASE TRANSMEMBRANE ALDEHYDE DEHYDROGENASE                              | II.4    |
| RSc2537 | RS00708 |  |  |  |  | -0.61 0.00 |     | TRANSCRIPTION REGULATOR TRANSCRIPTION REGULATOR                                  | VI.A    |
| RSc2538 | RS00712 |  |  |  |  |            |     | TRANSMEMBRANE COG0385, Na <sup>+</sup> -dependent transporter                    | IV.D    |
| RSc2539 | RS00715 |  |  |  |  | -0.53 0.00 |     | N-ACETYLMURAMOYL-L-ALANINE AMIDASE AMIC PRECURSOR                                | III.B.3 |
| RSc2540 | RS00716 |  |  |  |  |            |     | COG0802, ATPase or kinase                                                        | VI.C    |
| RSc2541 | RS00718 |  |  |  |  |            |     | COG1600, Uncharacterized Fe-S protein                                            | I.H     |
| RSc2542 | RS00721 |  |  |  |  | -0.50 0.01 |     | TRANSMEMBRANE LIPOPROTEIN                                                        | VI.C    |
| RSc2543 | RS00722 |  |  |  |  | -0.51 0.00 |     | Methylated-DNA--protein-cysteine methyltransferase                               | II.B.8  |
| RSc2544 | RS00723 |  |  |  |  | -0.41 0.05 |     | INTEGRASE/RECOMBINASE                                                            | II.B.8  |
| RSc2545 | RS00724 |  |  |  |  |            |     | CONSERVED HYPOTHETICAL PROTEIN                                                   | VI.C    |
| RSc2546 | RS00725 |  |  |  |  |            |     | TRANSMEMBRANE                                                                    | VI.C    |
| RSc2547 | RS00726 |  |  |  |  | -0.73 0.00 |     | TRANSMEMBRANE ACYL-HOMOSERINE LACTONE ACYLASE                                    | II      |
| RSc2548 | RS00727 |  |  |  |  | 0.38 0.01  |     | TRANSMEMBRANE INOSINE-URIDINE PREFERRING NUCLEOSIDE HYDROLASE I.F.12             | IF.12   |
| RSc2549 | RS00728 |  |  |  |  | -0.52 0.00 |     | CONSERVED HYPOTHETICAL PROTEIN                                                   | VI.C    |
| RSc2550 | RS00729 |  |  |  |  | 0.40 0.00  |     | OXIDOREDUCTASE UDP-N-ACETYLENOLPYRUVOYLGLUCOSAMINE REDUCTASE                     | III.B.3 |
| RSc2551 | RS00730 |  |  |  |  |            |     | COG1752, Predicted esterase of the alpha-beta hydrolase superfamily              | I       |
| RSc2552 | RS00731 |  |  |  |  | -0.30 0.05 |     | CONSERVED HYPOTHETICAL PROTEIN                                                   | VI.C    |
| RSc2553 | RS00732 |  |  |  |  |            |     | ARGININOSUCCINATE SYNTHASE                                                       | IA.17   |
| RSc2554 | RS00733 |  |  |  |  | 0.57 0.02  |     | ORNITHINE CARBAMOYLTRANSFERASE                                                   | IA.17   |
| RSc2555 | RS00734 |  |  |  |  | -0.45 0.03 |     | CONSERVED HYPOTHETICAL PROTEIN                                                   | VI.C    |
| RSc2556 | RS00735 |  |  |  |  | -0.44 0.00 |     | 30S RIBOSOMAL SUBUNIT PROTEIN S20                                                | III.C.2 |
| RSc2557 | RS00736 |  |  |  |  | -0.52 0.04 |     | TRANSMEMBRANE                                                                    | VI.C    |
| RSc2558 | RS00740 |  |  |  |  |            |     | CONSERVED HYPOTHETICAL PROTEIN                                                   | VI.C    |
| RSc2559 | RS00742 |  |  |  |  |            |     | TRANSMEMBRANE DEDA PROTEIN                                                       | VI.C    |
| RSc2560 | RS00743 |  |  |  |  | -0.70 0.02 |     | TRANSCRIPTION REGULATOR                                                          | VI.A    |
| RSc2561 | RS00746 |  |  |  |  | -1.31 0.01 |     | LIPOPROTEIN                                                                      | VI.C    |
| RSc2562 | RS00750 |  |  |  |  |            |     | TRANSMEMBRANE                                                                    | VI.C    |
| RSc2563 | RS00753 |  |  |  |  | 0.61 0.01  |     | DNA MISMATCH REPAIR PROTEIN                                                      | II.B.8  |
| RSc2564 | RS00755 |  |  |  |  |            |     | TRNA DELTA2-ISOPENTENYLPIRROPHOSPHATE TRANSFERASE                                | II.D.1  |
| RSc2565 | RS00758 |  |  |  |  | 0.22 0.02  |     | ACETYLTRANSFERASE                                                                | I       |
| RSc2566 | RS00760 |  |  |  |  |            |     | METHYLATED-DNA--PROTEIN-CYSTEINE METHYLTRANSFERASE                               | II.B.8  |
| RSc2567 | RS00763 |  |  |  |  | -1.14 0.00 |     | CONSERVED HYPOTHETICAL PROTEIN                                                   | VI.C    |
| RSc2568 | RS00764 |  |  |  |  | -0.42 0.00 |     | ALKYLATED DNA REPAIR                                                             | II.B.8  |
| RSc2569 | RS00766 |  |  |  |  | -0.56 0.01 |     | DNA-3-METHYLADENINE GLYCOSYLASE                                                  | II.B.8  |
| RSc2570 | RS00768 |  |  |  |  | 0.83 0.03  |     | TRANSCRIPTION REGULATOR ADA REGULATORY PROTEIN OF ADAPTATIVE R                   | II.B.8  |
| RSc2571 | RS00770 |  |  |  |  |            |     | CONSERVED HYPOTHETICAL PROTEIN                                                   | VI.C    |
| RSc2572 | RS00771 |  |  |  |  |            |     | LIPOPROTEIN                                                                      | VI.D    |
| RSc2573 | RS00774 |  |  |  |  | -0.43 0.00 |     | ISRs015-TRANSPOSASE                                                              | VI.A    |
| RSc2574 | RS00781 |  |  |  |  |            |     | CONSERVED HYPOTHETICAL PROTEIN                                                   | VI.C    |
| RSc2575 | RS00938 |  |  |  |  |            |     | TRANSMEMBRANE CONJUGAL TRANSFER PROTEIN TRBI                                     | VI.B    |
| RSc2576 | RS00782 |  |  |  |  |            |     | CONJUGAL TRANSFER LIPOPROTEIN TRBG                                               | VI.B    |
| RSc2577 | RS00783 |  |  |  |  | -0.56 0.05 |     | TRANSMEMBRANE CONJUGAL TRANSFER PROTEIN TRBF                                     | VI.B    |
| RSc2578 | RS00784 |  |  |  |  |            |     | TRANSMEMBRANE CONJUGAL TRANSFER PROTEIN TRBL                                     | VI.B    |
| RSc2579 | RS00786 |  |  |  |  |            |     | LIPOPROTEIN                                                                      | VI.C    |
| RSc2580 | RS00788 |  |  |  |  |            |     | SIGNAL PEPTIDE CONJUGAL TRANSFER PROTEIN TRBJ                                    | VI.B    |
| RSc2581 | RS00789 |  |  |  |  |            |     | CONJUGAL TRANSFER PROTEIN TRBE                                                   | VI.B    |
| RSc2582 | RS00791 |  |  |  |  |            |     | TRANSMEMBRANE CONJUGAL TRANSFER PROTEIN TRBD                                     | VI.B    |
| RSc2583 | RS00793 |  |  |  |  |            |     | TRANSMEMBRANE CONJUGAL TRANSFER PROTEIN TRBC                                     | VI.B    |
| RSc2584 | RS00795 |  |  |  |  |            |     | CONJUGAL TRANSFER PROTEIN TRBB                                                   | VI.B    |
| RSc2585 | RS00797 |  |  |  |  |            |     | HYPOTHETICAL/UNKNOWN                                                             | VI.C    |
| RSc2586 | RS00798 |  |  |  |  | 0.82 0.02  |     | TRANSMEMBRANE Plasmid Conjugation protein TraG                                   | VI.B    |
| RSc2587 | RS00835 |  |  |  |  | -0.55 0.00 |     | LIPOPROTEIN                                                                      | VI.C    |
| RSc2588 | RS00836 |  |  |  |  | -0.56 0.00 |     | TRANSCRIPTION REGULATOR PLASMID REPLICATION REGULATORY PROTEIN V.B               | VI.B    |
| RSc2589 | RS00837 |  |  |  |  | -0.65 0.00 |     | LIMONENE-1,2-EPOXIDE HYDROLASE                                                   | II.4    |
| RSc2590 | RS00838 |  |  |  |  | -0.50 0.00 |     | LIMONENE-1,2-EPOXIDE HYDROLASE                                                   | II.4    |
| RSc2591 | RS00839 |  |  |  |  | -0.46 0.00 |     | TRANSCRIPTION REGULATOR TRANSCRIPTIONAL REGULATOR                                | VI.A    |
| RSc2592 | RS00840 |  |  |  |  |            |     | CONSERVED HYPOTHETICAL PROTEIN                                                   | VI.C    |
| RSc2593 | RS00841 |  |  |  |  |            |     | COG2272, Carboxylesterase type B                                                 | VI.C    |
| RSc2594 | RS00842 |  |  |  |  |            |     | GLUTATHIONE-S-TRANSFERASE                                                        | II.B.7  |
| RSc2595 | RS00843 |  |  |  |  |            |     | CONSERVED HYPOTHETICAL PROTEIN                                                   | VI.C    |
| RSc2596 | RS00844 |  |  |  |  | 0.77 0.02  |     | COG1335, Amidase related to nicotinamidase                                       | I       |
| RSc2597 | RS00845 |  |  |  |  | -0.29 0.01 |     | OXIDOREDUCTASE COG1028, Dehydrogenases with different specificities (related to  | VI.A    |
| RSc2598 | RS00846 |  |  |  |  |            |     | TRANSCRIPTION REGULATOR                                                          | VI.A    |
| RSc2599 | RS00847 |  |  |  |  | -1.02 0.03 |     | HYPOTHETICAL PROTEIN                                                             | VI.B    |
| RSc2600 | RS00848 |  |  |  |  | -0.48 0.00 |     | HYPOTHETICAL PROTEIN                                                             | VI.B    |
| RSc2601 | RS00849 |  |  |  |  |            |     | COG3843, Type IV secretory pathway VirD2 (relaxase) - related protein            | VI.B    |
| RSc2602 | RS00850 |  |  |  |  |            |     | TRANSMEMBRANE CONJUGAL TRANSFER PROTEIN TRAF                                     | VI.B    |
| RSc2603 | RS00851 |  |  |  |  |            |     | CONSERVED HYPOTHETICAL PROTEIN                                                   | VI.C    |
| RSc2604 | RS00852 |  |  |  |  |            |     | CONSERVED HYPOTHETICAL PROTEIN                                                   | VI.C    |
| RSc2605 | RS00853 |  |  |  |  | -0.69 0.05 |     | PARTITION PROTEIN                                                                | VI.B    |
| RSc2606 | RS00854 |  |  |  |  |            |     | REPLICATION INITIATION REPA - LIKE PROTEIN                                       | VI.B    |
| RSc2607 | RS00855 |  |  |  |  | -0.55 0.05 |     | CONSERVED HYPOTHETICAL PROTEIN                                                   | VI.C    |
| RSc2608 | RS00857 |  |  |  |  | -0.28 0.03 |     | CONSERVED HYPOTHETICAL PROTEIN                                                   | VI.C    |
| RSc2609 | RS00858 |  |  |  |  | -0.48 0.04 |     | lipoprotein                                                                      | VI.B    |
| RSc2610 | RS00859 |  |  |  |  |            |     | TRANSCRIPTION REGULATOR                                                          | VI.A    |
| RSc2611 | RS00860 |  |  |  |  | -0.49 0.01 |     | CONSERVED HYPOTHETICAL PROTEIN                                                   | VI.C    |
| RSc2612 | RS00912 |  |  |  |  | -0.54 0.04 |     | TRANSMEMBRANE                                                                    | VI.C    |
| RSc2613 | RS00913 |  |  |  |  |            |     | CONSERVED HYPOTHETICAL PROTEIN                                                   | VI.C    |
| RSc2614 | RS00916 |  |  |  |  |            |     | CONSERVED HYPOTHETICAL PROTEIN                                                   | VI.C    |
| RSc2615 | RS00917 |  |  |  |  | -0.56 0.03 |     | CONSERVED HYPOTHETICAL PROTEIN                                                   | VI.C    |
| RSc2616 | RS00918 |  |  |  |  | -0.75 0.00 |     | CONSERVED HYPOTHETICAL PROTEIN                                                   | VI.C    |
| RSc2617 | RS00919 |  |  |  |  | -1.29 0.01 |     | CONSERVED HYPOTHETICAL PROTEIN                                                   | VI.C    |







|         |         |       |      |       |      |       |      |       |      |       |                                                                                     |         |
|---------|---------|-------|------|-------|------|-------|------|-------|------|-------|-------------------------------------------------------------------------------------|---------|
| RSc2842 | RS00263 | 0,43  | 0,03 | -0,52 | 0,00 |       |      | -0,70 | 0,00 | ddIB  | D-ALANINE--D-ALANINE LIGASE B                                                       | III.B.3 |
| RSc2843 | RS00262 |       |      |       |      |       |      |       |      | murC  | UDP-N-ACETYLMURAMATE--ALANINE LIGASE                                                | III.B.3 |
| RSc2844 | RS00261 | 0,32  | 0,05 |       |      |       |      |       |      | murG  | UDP-N-ACETYLMURAMATE--ALANINE LIGASE                                                | III.B.3 |
| RSc2845 | RS00260 |       |      | -0,47 | 0,00 |       |      | -0,68 | 0,03 | ftsW  | TRANSMEMBRANE CELL DIVISION PROTEIN FTSW                                            | IV.A    |
| RSc2846 | RS00259 |       |      |       |      |       |      | -1,34 | 0,00 | murD  | UDP-N-ACETYLMURAMATE--D-GLUTAMATE LIGASE                                            | III.B.3 |
| RSc2847 | RS00258 | 0,55  | 0,00 | -0,35 | 0,00 |       |      | -1,21 | 0,00 | mraY  | TRANSMEMBRANE HOSPHO-N-ACETYLMURAMATE--D-GLUTAMATE--D-AMINOPEPTIDE-TRANSFERASE      | III.B.3 |
| RSc2848 | RS00257 |       |      |       |      |       |      |       |      | murF  | UDP-N-ACETYLMURAMATE--D-GLUTAMATE--D-AMINOPEPTIDE-TRANSFERASE                       | III.B.3 |
| RSc2849 | RS00256 |       |      |       |      |       |      |       |      | murE  | UDP-N-ACETYLMURAMATE--D-GLUTAMATE--D-AMINOPEPTIDE-TRANSFERASE                       | III.B.3 |
| RSc2850 | RS00255 | 0,48  | 0,04 | -0,41 | 0,02 |       |      | -1,21 | 0,00 | ftsI  | TRANSMEMBRANE PENICILLIN-BINDING PROTEIN 3 PRECURSOR PBP-3                          | IV.A    |
| RSc2851 | RS00254 | 0,34  | 0,04 | -0,43 | 0,01 |       |      | -0,75 | 0,03 | ftsL  | TRANSMEMBRANE CELL DIVISION PROTEIN FTSL                                            | IV.A    |
| RSc2852 | RS00253 |       |      |       |      |       |      |       |      | mraW  | COG0275, S-adenosylmethionine-dependent methyltransferase involved in cell envelope | III.B   |
| RSc2853 | RS00252 |       |      | -0,77 | 0,00 |       |      |       |      |       | CONSERVED HYPOTHETICAL PROTEIN                                                      | VLC     |
| RSc2854 | RS00251 |       |      | -0,46 | 0,01 |       |      |       |      |       | COG2941, Ubiquinone biosynthesis protein                                            | I.B.5   |
| RSc2855 | RS00250 |       |      | 1,26  | 0,00 | 1,80  | 0,00 | 0,60  | 0,05 |       | SIGNAL PEPTIDE OUTER MEMBRANE PORIN PROTEIN                                         | IV.D    |
| RSc2856 | RS00249 |       |      | 0,38  | 0,02 | 0,88  | 0,02 |       |      |       | TRANSMEMBRANE METABOLITE TRANSPORT PROTEIN                                          | IV.D    |
| RSc2857 | RS00248 | 0,96  | 0,01 | -0,31 | 0,03 |       |      |       |      | fadD1 | LONG-CHAIN-FATTY-ACID--COA LIGASE                                                   | I.I.1   |
| RSc2858 | RS00247 | 1,78  | 0,00 | -1,63 | 0,00 |       |      | 2,80  | 0,00 |       | ZINC PROTEASE                                                                       | II.A.4  |
| RSc2859 | RS00246 | 0,66  | 0,02 |       |      |       |      |       |      |       | OXIDOREDUCTASE COG0243, Anaerobic dehydrogenase, typically selenocysteine-c         | I       |
| RSc2860 | RS00245 |       |      | -0,36 | 0,02 |       |      |       |      | fruR  | TRANSCRIPTION REGULATOR TRANSCRIPTION REGULATION REPRESSOR                          | I.H.8   |
| RSc2861 | RS00244 |       |      |       |      | -2,28 | 0,02 |       |      | fruB  | MULTIPHOSPHORYL TRANSFER PROTEIN MTP                                                | I.H.8   |
| RSc2862 | RS00243 |       |      |       |      |       |      |       |      | fruK  | 1-PHOSPHOFRUCTOKINASE                                                               | I.H.8   |
| RSc2863 | RS00242 |       |      |       |      |       |      |       |      | fruA  | TRANSMEMBRANE PTS SYSTEM, FRUCTOSE-SPECIFIC IIBC COMPONENT (EIIIB IV.D.3            | IV.D.3  |
| RSc2864 | RS00241 | 0,60  | 0,01 | -0,52 | 0,00 | 0,57  | 0,04 |       |      |       | ABC TRANSPORTER ABC-type branched-chain amino acid transport systems, peripl        | IV.D.2  |
| RSc2865 | RS00240 |       |      |       |      |       |      |       |      |       | HYPOTHETICAL PROTEIN                                                                | VI.D    |
| RSc2866 | RS00239 |       |      | -0,36 | 0,00 |       |      |       |      | dppF1 | ABC TRANSPORTER OLIGOPEPTIDE ATP-BINDING PROTEIN                                    | IV.D.7  |
| RSc2867 | RS00238 | 0,53  | 0,03 | -0,38 | 0,02 | 0,52  | 0,02 |       |      | dppD1 | ABC TRANSPORTER OLIGOPEPTIDE ATP-BINDING PROTEIN                                    | IV.D.7  |
| RSc2868 | RS00237 |       |      | -0,23 | 0,03 |       |      |       |      | dppC1 | TRANSMEMBRANE DIPEPTIDE TRANSPORT SYSTEM PERMEASE PROTEIN                           | IV.D.7  |
| RSc2869 | RS00236 |       |      |       |      |       |      |       |      | dppB1 | ABC TRANSPORTER TRANSMEMBRANE PROTEIN (DIPEPTIDE TRANSPORT SY                       | IV.D.7  |
| RSc2870 | RS00235 |       |      | -0,52 | 0,00 |       |      |       |      | dppA1 | PERIPLASMIC DIPEPTIDE TRANSPORT PROTEIN                                             | IV.D.7  |
| RSc2871 | RS00234 |       |      |       |      |       |      |       |      | hipO  | HIPPURATE HYDROLASE                                                                 | I.I     |
| RSc2872 | RS00233 |       |      |       |      |       |      |       |      | paaF  | ENOYL-COA HYDRATASE                                                                 | I.I.4   |
| RSc2873 | RS00232 |       |      | -0,59 | 0,00 |       |      |       |      | paaG1 | ENOYL-COA HYDRATASE                                                                 | I.I.4   |
| RSc2874 | RS00231 |       |      | -0,31 | 0,03 | -0,70 | 0,01 |       |      | paal  | PHENYLACETIC ACID DEGRADATION PROTEIN                                               | I.I.4   |
| RSc2875 | RS00230 | 0,53  | 0,02 | -0,36 | 0,00 |       |      |       |      | paak  | PHENYLACETYL-CoA-LIGASE                                                             | I.I.4   |
| RSc2876 | RS00229 | 0,51  | 0,04 |       |      |       |      |       |      |       | TRANSMEMBRANE MEMBRANE-BOUND LYTIC MUREIN TRANSGLYCOSYLASE                          | III.B.3 |
| RSc2877 | RS00228 |       |      |       |      |       |      |       |      |       | TRANSMEMBRANE                                                                       | VLC     |
| RSc2878 | RS00227 |       |      |       |      | 0,59  | 0,04 |       |      | apaG  | CONSERVED HYPOTHETICAL PROTEIN                                                      | VLC     |
| RSc2879 | RS00226 | 0,57  | 0,01 | -0,21 | 0,02 |       |      |       |      | rpe   | RIBULOSE-PHOSPHATE 3-EPIMERASE                                                      | I.F.19  |
| RSc2880 | RS00225 |       |      | -0,47 | 0,01 |       |      |       |      | gph   | PHOSPHOGLYCOLATE PHOSPHATASE                                                        | I.I.4   |
| RSc2881 | RS00224 |       |      | 0,86  | 0,00 | 0,69  | 0,01 |       |      | trpE  | ANTHRANILATE SYNTHASE COMPONENT I                                                   | I.A.6   |
| RSc2882 | RS00223 |       |      | 1,19  | 0,00 | 0,96  | 0,01 |       |      | trpG  | PANTHRANILATE SYNTHASE COMPONENT II (GLUTAMINE AMIDO-TRANSFERASE                    | I.A.6   |
| RSc2883 | RS00222 |       |      | 1,17  | 0,00 | 0,96  | 0,00 |       |      |       | SIGNAL PEPTIDE                                                                      | VLC     |
| RSc2884 | RS00221 | -0,78 | 0,00 | 1,13  | 0,00 |       |      |       |      | trpD1 | ANTHRANILATE PHOSPHORIBOSYLTRANSFERASE                                              | I.A.6   |
| RSc2885 | RS00220 |       |      | 1,05  | 0,00 | 2,84  | 0,00 |       |      | trpC1 | INDOLE-3-GLYCEROL PHOSPHATE SYNTHASE                                                | I.A.6   |
| RSc2886 | RS00219 |       |      | 0,98  | 0,00 | 1,04  | 0,01 |       |      |       | CONSERVED HYPOTHETICAL PROTEIN                                                      | VLC     |
| RSc2887 | RS00218 | -1,09 | 0,05 | 0,31  | 0,03 | 0,85  | 0,00 |       |      | ung   | URACIL-DNA GLYCOSYLASE                                                              | II.B.8  |
| RSc2888 | RS00217 |       |      |       |      | -1,11 | 0,00 | -0,37 | 0,01 |       | HYPOTHETICAL PROTEIN                                                                | VI.B    |
| RSc2889 | RS00216 |       |      |       |      | -0,65 | 0,05 |       |      |       | TRANSMEMBRANE                                                                       | VLC     |
| RSc2890 | RS00215 | 0,64  | 0,00 | -0,48 | 0,00 |       |      |       |      |       | COG3975, Predicted protease with the C-terminal PDZ domain                          | II.A.4  |
| RSc2891 | RS00214 | 1,14  | 0,02 |       |      |       |      |       |      | dsbC  | OXIDOREDUCTASE COG0604, NADPH:quinone reductase and related Zn-dependen             | I       |
| RSc2892 | RS00213 | 0,26  | 0,04 | -0,55 | 0,00 |       |      | -0,44 | 0,00 |       | THIOL-DISULFIDE INTERCHANGE PROTEIN                                                 | II.B.7  |
| RSc2893 | RS00212 | 0,68  | 0,02 |       |      | 0,89  | 0,02 |       |      |       | OXIDOREDUCTASE                                                                      | I       |
| RSc2894 | RS00211 | -0,62 | 0,05 |       |      |       |      |       |      |       | TRANSMEMBRANE                                                                       | VI.D    |
| RSc2895 | RS00210 | -0,31 | 0,05 | 0,47  | 0,02 |       |      |       |      |       | SIGNAL PEPTIDE                                                                      | VI.D    |
| RSc2896 | RS00209 |       |      |       |      |       |      |       |      |       | CONSERVED HYPOTHETICAL PROTEIN                                                      | VLC     |
| RSc2897 | RS00208 | -3,14 | 0,01 | -5,22 | 0,00 | 4,40  | 0,03 | 3,50  | 0,00 |       | CONSERVED HYPOTHETICAL PROTEIN                                                      | VLC     |
| RSc2898 | RS00207 | 0,64  | 0,02 |       |      |       |      | -0,27 | 0,00 |       | COG0102, GTPase, probable translation factor                                        | II.B.7  |
| RSc2899 | RS00206 |       |      | 1,01  | 0,00 | 1,50  | 0,00 |       |      |       | TRANSMEMBRANE                                                                       | VLC     |
| RSc2900 | RS00205 |       |      | -0,45 | 0,02 |       |      |       |      | hemA  | OXIDOREDUCTASE GLUTAMYL-TRNA REDUCTASE                                              | I.B.4   |
| RSc2901 | RS00204 | 0,79  | 0,02 | -0,54 | 0,01 |       |      | 0,65  | 0,01 | prfA  | PEPTIDE CHAIN RELEASE FACTOR 1 RF-1                                                 | II.B.7  |
| RSc2902 | RS00203 |       |      | -0,54 | 0,01 |       |      |       |      |       | LIPOPROTEIN                                                                         | VLC     |
| RSc2903 | RS00202 | 0,87  | 0,01 | -0,54 | 0,00 |       |      |       |      | hemK  | Methylase of polypeptide chain release factors                                      | II.B.7  |
| RSc2904 | RS00201 | 0,56  | 0,01 |       |      | 0,53  | 0,05 |       |      |       | CONSERVED HYPOTHETICAL PROTEIN                                                      | VLC     |
| RSc2905 | RS00200 | 0,64  | 0,04 |       |      |       |      |       |      | ubiX  | 3-OCTAPRENYL-4-HYDROXYBENZOATE CARBOXY-LYASE                                        | I       |
| RSc2906 | RS00199 |       |      | -0,89 | 0,00 | 0,99  | 0,00 | 2,10  | 0,00 |       | TRANSMEMBRANE                                                                       | VLD     |
| RSc2907 | RS00198 |       |      | -0,53 | 0,01 |       |      |       |      |       | SIGNAL PEPTIDE                                                                      | VLC     |
| RSc2908 | RS00197 |       |      | -0,53 | 0,01 |       |      |       |      | mdoG  | SIGNAL PEPTIDE PERIPLASMIC GLUCANS BIOSYNTHESIS                                     | IV.F.2  |
| RSc2909 | RS00196 |       |      | 1,13  | 0,00 |       |      |       |      | mdoH  | TRANSMEMBRANE PERIPLASMIC GLUCANS BIOSYNTHESIS PROTEIN                              | IV.F.2  |
| RSc2910 | RS00195 |       |      | -0,78 | 0,00 | 0,49  | 0,02 | 2,50  | 0,00 |       | SIGNAL PEPTIDE                                                                      | VLC     |
| RSc2911 | RS00194 |       |      | -0,58 | 0,00 | 0,80  | 0,01 |       |      |       | CONSERVED HYPOTHETICAL PROTEIN                                                      | VLC     |
| RSc2912 | RS00193 |       |      | -0,58 | 0,01 |       |      |       |      |       | CONSERVED HYPOTHETICAL PROTEIN                                                      | VLC     |
| RSc2913 | RS00192 | 0,57  | 0,04 | -0,51 | 0,00 |       |      |       |      |       | ABC TRANSPORTER ATP-BINDING PROTEIN                                                 | IV.D    |
| RSc2914 | RS00191 | 0,77  | 0,00 | -0,83 | 0,00 |       |      |       |      | cyoD1 | OXIDOREDUCTASE TRANSMEMBRANE CYTOCHROME O UBIQUINOL OXIDASE                         | I.H.3   |
| RSc2915 | RS00190 | 0,91  | 0,00 | -0,80 | 0,00 | 0,72  | 0,00 | 0,68  | 0,01 | cyoC1 | OXIDOREDUCTASE TRANSMEMBRANE CYTOCHROME O UBIQUINOL OXIDASE                         | I.H.3   |
| RSc2916 | RS00189 | 1,20  | 0,00 | -0,71 | 0,00 | 2,11  | 0,00 |       |      | cyoB1 | OXIDOREDUCTASE TRANSMEMBRANE CYTOCHROME O UBIQUINOL OXIDASE                         | I.H.3   |
| RSc2917 | RS00188 | 0,84  | 0,02 | -0,94 | 0,01 |       |      | -0,95 | 0,00 | cyoA1 | OXIDOREDUCTASE TRANSMEMBRANE CYTOCHROME O UBIQUINOL OXIDASE                         | I.H.3   |
| RSc2918 | RS00187 |       |      | -1,38 | 0,00 |       |      | -1,08 | 0,01 |       | TRANSCRIPTION REGULATOR EXTRACYTOPLASMIC FUNCTION SIGMA FACTO                       | I.E.1   |
| RSc2919 | RS00186 | 0,61  | 0,01 | -1,10 | 0,00 | -1,08 | 0,01 | -3,16 | 0,01 |       | TRANSMEMBRANE IRON TRANSPORT - SENSORY TRANSDUCTION PROTEIN                         | IV.D.5  |
| RSc2920 | RS00185 |       |      |       |      |       |      |       |      |       | SIGNAL PEPTIDE HYDROXAMATE-TYPE FERRISIDEROPHORE RECEPTOR                           | IV.D.5  |
| RSc2921 | RS00184 | 0,74  | 0,02 | -0,92 | 0,01 |       |      |       |      | ggI2  | GAMMA-GLUTAMYLTRANSEPTIDASE PRECURSOR                                               | I.B.6   |
| RSc2922 | RS00183 |       |      | -0,52 | 0,05 |       |      |       |      |       | SIGNAL PEPTIDE OUTER MEMBRANE RECEPTOR                                              | III.B.2 |
| RSc2923 | RS00182 | 1,08  | 0,00 | -0,40 | 0,02 |       |      |       |      |       | TRANSCRIPTION REGULATOR TRANSMEMBRANE SENSOR HISTIDINE KINASE                       | VI.A    |
| RSc2924 | RS00181 |       |      |       |      |       |      |       |      |       | COG0456, Acetyltransferase                                                          | I       |
| RSc2925 | RS00180 | 0,88  | 0,00 |       |      |       |      | -0,79 | 0,00 | sspB  | STRINGENT STARVATION PROTEIN B                                                      | I.E.1   |
| RSc2926 | RS00179 | 0,82  | 0,00 |       |      |       |      |       |      | sspA  | TRANSCRIPTION MODULATOR PROTEIN                                                     | I.E.1   |
| RSc2927 | RS00178 | 0,91  | 0,03 |       |      |       |      |       |      | petC  | TRANSMEMBRANE CYTOCHROME C1 PRECURSOR                                               | I.G.1   |
| RSc2928 | RS00177 |       |      |       |      |       |      |       |      | petB  | TRANSMEMBRANE CYTOCHROME B SUBUNIT                                                  | I.G.1   |
| RSc2929 | RS00176 |       |      |       |      |       |      |       |      | petA  | OXIDOREDUCTASE TRANSMEMBRANE UBIQUINOL-CYTOCHROME C REDUCTA                         | I.G.1   |
| RSc2930 | RS00175 |       |      | -0,60 | 0,00 |       |      |       |      | mscL  | TRANSMEMBRANE LARGE-CONDUCTANCE MECHANOSENSITIVE CHANNEL                            | IV.D    |
| RSc2931 | RS00174 |       |      |       |      |       |      |       |      |       | CONSERVED HYPOTHETICAL PROTEIN                                                      | VLC     |
| RSc2932 | RS00173 | 0,59  | 0,00 |       |      |       |      |       |      |       | SIGNAL PEPTIDE HTRA-LIKE SERINE PROTEASE                                            | II.A.4  |
| RSc2933 | RS00172 |       |      | -0,44 | 0,01 |       |      |       |      |       | SIGNAL PEPTIDE PORIN                                                                | IV.D    |
| RSc2934 | RS00171 |       |      | -0,39 | 0,00 |       |      |       |      |       | ABC TRANSPORTER COG1840, ABC-type Fe3+ transport system, periplasmic comp           | IV.D.5  |
| RSc2935 | RS00170 |       |      |       |      |       |      |       |      |       | TRANSCRIPTION REGULATOR RESPONSE REGULATOR                                          | VI.A    |
| RSc2936 | RS00169 |       |      |       |      |       |      |       |      |       | TRANSCRIPTION REGULATOR TRANSMEMBRANE SENSOR KINASE                                 | VI.A    |
| RSc2937 | RS00168 |       |      |       |      |       |      |       |      |       | SIGNAL PEPTIDE PERIPLASMIC IRON-BINDING PROTEIN                                     | IV.D.5  |
| RSc2938 | RS00167 | 0,37  | 0,03 |       |      |       |      |       |      |       | ABC TRANSPORTER TRANSMEMBRANE PROTEIN                                               | IV.D    |
| RSc2939 | RS00166 |       |      | -0,47 | 0,00 |       |      |       |      |       | ABC TRANSPORTER ATP-BINDING PROTEIN                                                 | IV.D    |
| RSc2940 | RS00165 | 0,47  | 0,00 |       |      |       |      |       |      | tatC  | TRANSMEMBRANE SEC-INDEPENDENT PROTEIN TRANSLOCASE PROTEIN TATIV.E.2                 | IV.E.2  |
| RSc2941 | RS00164 |       |      | -0,57 | 0,00 | -0,56 | 0,03 |       |      | tatB  | SEC-INDEPENDENT PROTEIN TRANSLOCASE PROTEIN TATB                                    | IV.E.2  |
| RSc2942 | RS00163 |       |      | 0,38  | 0,00 |       |      |       |      | tatA  | SIGNAL PEPTIDE SEC-INDEPENDENT PROTEIN TRANSLOCASE PROTEIN TATA                     | IV.E.2  |
| RSc2943 | RS00162 | 0,40  | 0,04 | -0,47 | 0,01 |       |      | -0,25 | 0,05 |       | TRANSMEMBRANE                                                                       | VLC     |
| RSc2944 | RS00161 |       |      | -0,45 | 0,03 |       |      | -0,88 | 0,01 | hisE  | PHOSPHORIBOSYL-ATP PYROPHOSPHATASE                                                  | I.A.4   |
| RSc2945 | RS00160 | 0,76  | 0,01 |       |      | 0,82  | 0,01 | -0,77 | 0,00 | hisI  | PHOSPHORIBOSYL-AMP CYCLOHYDROLASE                                                   | I.A.4   |
| RSc2946 | RS00159 | 0,65  | 0,02 |       |      |       |      | -0,66 | 0,00 | hisF  | CYCLASE (IMIDAZOLE GLYCEROL PHOSPHATE SYNTHASE - SUBUNIT WITH HIS                   | I.A.4   |
| RSc2947 | RS00158 | 0,50  | 0,04 |       |      |       |      |       |      | hisA  | PHOSPHORIBOSYLFORMIMINO-5-AMINOIMIDAZOLE CARBOXAMIDE RIBOTIDE                       | I.A.4   |
| RSc2948 | RS00157 |       |      | -0,53 | 0,03 |       |      | 0,99  | 0,03 | hisH  | AMIDOTRANSFERASE (GLUTAMINE AMIDOTRANSFERASE - SUBUNIT WITH HIS                     | I.A.4   |
| RSc2949 | RS00156 |       |      |       |      |       |      |       |      |       | TRANSMEMBRANE COG2095, Multiple antibiotic transporter                              | IV.D    |
| RSc2950 | RS00155 | 0,38  | 0,01 | -0,36 | 0,04 |       |      |       |      | hisB  | OXIDOREDUCTASE IMIDAZOLEGLYCEROL-PHOSPHATE DEHYDRATASE                              | I.A.4   |
| RSc2951 | RS00154 |       |      | 0,23  | 0,03 |       |      |       |      | hisC1 | HISTIDINOL-PHOSPHATE AMINOTRANSFERASE                                               | I.A.4   |
| RSc2952 | RS00153 | 0,43  | 0,00 | -0,28 | 0,05 |       |      |       |      | hisD  | OXIDOREDUCTASE HISTIDINOL DEHYDROGENASE                                             | I.A.4   |
| RSc2953 | RS04753 | 0,95  | 0,00 | -0,41 | 0,00 | 1,05  | 0,03 | -0,33 | 0,04 | murA  | UDP-N-ACETYLMURAMATE--D-GLUCOSAMINE 1-CARBOXYVINYLT                                 | III.B.3 |



|         |         |       |      |       |      |       |      |       |      |                                                                               |          |
|---------|---------|-------|------|-------|------|-------|------|-------|------|-------------------------------------------------------------------------------|----------|
| RSc3067 | RS00511 |       |      | -1.04 | 0.00 |       |      | -2.05 | 0.00 | TRANSMEMBRANE                                                                 | V.I.C    |
| RSc3068 | RS00512 |       |      | -0.39 | 0.01 |       |      |       |      | TRANSMEMBRANE COG0668, Small-conductance mechanosensitive channel             | V.I.C    |
| RSc3069 | RS00513 |       |      | -0.70 | 0.00 |       |      |       |      | TRANSMEMBRANE TRANSPORTER PROTEIN                                             | I.V.D    |
| RSc3070 | RS00514 |       |      | -1.14 | 0.00 |       |      |       |      | GLUTATHIONE S-TRANSFERASE                                                     | I.I.B.7  |
| RSc3071 | RS00520 |       |      |       |      | 1.11  | 0.03 | 1.27  | 0.00 | CONSERVED HYPOTHETICAL PROTEIN                                                | V.I.C    |
| RSc3072 | RS00521 |       |      |       |      |       |      | 2.35  | 0.00 | CONSERVED HYPOTHETICAL PROTEIN                                                | V.I.C    |
| RSc3073 | RS00522 |       |      |       |      |       |      |       |      | HYPOTHETICAL PROTEIN                                                          | V.I.D    |
| RSc3074 | RS00523 |       |      |       |      |       |      |       |      | HYPOTHETICAL PROTEIN                                                          | V.I.D    |
| RSc3075 | RS00524 |       | 0.79 | 0.01  |      | -0.66 | 0.00 |       |      | SIGNAL PEPTIDE                                                                | V.I.D    |
| RSc3076 | RS00525 | 1.13  | 0.04 |       |      | -0.96 | 0.00 |       |      | HYPOTHETICAL PROTEIN                                                          | V.I.D    |
| RSc3077 | RS00528 |       |      |       |      |       |      |       |      | TRANSMEMBRANE COG0053, Co/Zn/Cd cation transporters                           | I.V.D.4  |
| RSc3078 | RS00529 |       |      |       |      | -0.99 | 0.01 | -1.18 | 0.02 | TRANSCRIPTION REGULATOR RESPONSE REGULATOR                                    | V.I.A    |
| RSc3079 | RS00530 |       |      |       |      |       |      |       |      | TRANSCRIPTION REGULATOR COMPOSITE TWO COMPONENT REGULATORY                    | V.I.A    |
| RSc3080 | RS00531 |       |      |       |      |       |      |       |      | TRANSCRIPTION REGULATOR                                                       | V.I.A    |
| RSc3081 | RS00532 |       |      |       |      | -0.32 | 0.03 |       |      | LIPOPROTEIN                                                                   | V.I.D    |
| RSc3082 | RS00533 |       |      |       |      |       |      |       |      | PSEUDOGENE (C-TERMINAL FRAGMENT)                                              | V.I.D    |
| RSc3083 | RS00535 |       |      |       |      |       |      |       |      | SIGNAL PEPTIDE                                                                | V.I.D    |
| RSc3084 | RS00536 |       | 0.70 | 0.01  |      | -0.22 | 0.04 | 1.25  | 0.00 | TRANSMEMBRANE                                                                 | V.I.C    |
| RSc3085 | RS00537 |       |      |       |      | -0.35 | 0.02 |       |      | CONSERVED HYPOTHETICAL PROTEIN                                                | V.I.C    |
| RSc3086 | RS00538 |       |      |       |      | 0.35  | 0.01 |       |      | SIGNAL PEPTIDE HIGH POTENTIAL IRON-SULFUR PROTEIN (HIPIP)                     | I.H      |
| RSc3087 | RS00539 |       |      |       |      | -0.65 | 0.00 |       |      | TRANSCRIPTION REGULATOR RESPONSE REGULATOR                                    | V.I.A    |
| RSc3088 | RS00540 |       | 0.54 | 0.02  |      | 0.19  | 0.04 | 0.45  | 0.01 | SIGNAL PEPTIDE                                                                | V.I.C    |
| RSc3089 | RS00541 |       |      |       |      | -0.90 | 0.00 | -0.89 | 0.00 | ISRsso11                                                                      | V.A      |
| RSc3090 | RS00542 |       |      |       |      | -0.57 | 0.00 |       |      | ISRsso11                                                                      | V.A      |
| RSc3091 | RS00544 |       | 0.55 | 0.00  |      | -0.38 | 0.01 | 0.75  | 0.00 | ISRsso11                                                                      | V.A      |
| RSc3092 | RS00545 |       |      |       |      | -2.61 | 0.00 | -1.70 | 0.00 | SIGNAL PEPTIDE OUTER MEMBRANE PORIN                                           | I.II.B.2 |
| RSc3093 | RS00546 |       |      |       |      |       |      | -1.15 | 0.00 | SIGNAL PEPTIDE                                                                | V.I.C    |
| RSc3094 | RS00547 |       |      |       |      | -0.64 | 0.00 |       |      | TRANSMEMBRANE CARBOXYPEPTIDASE G2 PRECURSOR (FOLATE HYDROLASE)                | V.I.C    |
| RSc3095 | RS00548 |       |      |       |      | -0.70 | 0.02 |       |      | CONSERVED HYPOTHETICAL PROTEIN                                                | V.I.C    |
| RSc3096 | RS00549 |       |      |       |      |       |      |       |      | SERINE-RICH PROTEIN                                                           | V.I.D    |
| RSc3097 | RS00550 |       |      |       |      |       |      |       |      | TRANSMEMBRANE GLUTATHIONE-REGULATED POTASSIUM-EFFLUX SYSTEM                   | I.V.D.4  |
| RSc3098 | RS00551 |       |      |       |      | -0.80 | 0.00 | -1.21 | 0.04 | OXIDOREDUCTASE COG2249, NADPH-quinone reductase                               | V.I.C    |
| RSc3099 | RS00552 |       |      |       |      | 0.44  | 0.01 | 2.25  | 0.00 | CONSERVED HYPOTHETICAL PROTEIN                                                | V.I.C    |
| RSc3100 | RS00553 |       |      |       |      |       |      |       |      | SIGNAL PEPTIDE                                                                | V.I.C    |
| RSc3101 | RS00554 | -5.08 | 0.00 |       | 0.79 | 0.04  |      | -1.47 | 0.00 | COG4319, Ketosteroid isomerase homolog                                        | V.I.C    |
| RSc3102 | RS00555 |       |      |       | 1.07 | 0.05  |      | -0.61 | 0.00 | SERINE PROTEASE                                                               | I.I.A.4  |
| RSc3103 | RS00556 |       |      |       |      |       |      | -1.04 | 0.04 | TRANSCRIPTION REGULATOR                                                       | V.I.C    |
| RSc3104 | RS00557 |       |      |       |      |       |      |       |      | OXIDOREDUCTASE 4-HYDROXYPHENYLPIRUVATE DIOXYGENASE                            | I        |
| RSc3105 | RS00558 |       |      |       |      |       |      | 0.55  | 0.03 | SIGNAL PEPTIDE CALCIUM-BINDING PROTEIN                                        | V.I.C    |
| RSc3106 | RS00559 |       |      |       |      |       |      |       |      | TRANSMEMBRANE GENERAL SECRETION PATHWAY RELATED PROTEIN                       | I.V.E.2  |
| RSc3107 | RS00560 |       |      |       |      |       |      | 0.79  | 0.01 | TRANSMEMBRANE GENERAL SECRETION PATHWAY PROTEIN G                             | I.V.E.2  |
| RSc3108 | RS00561 |       |      |       |      |       |      |       |      | TRANSMEMBRANE GENERAL SECRETORY PATHWAY PROTEIN H                             | I.V.E.2  |
| RSc3109 | RS00562 |       |      |       |      |       |      |       |      | TRANSMEMBRANE GENERAL SECRETORY PATHWAY PROTEIN I                             | I.V.E.2  |
| RSc3110 | RS00563 |       |      |       |      |       |      |       |      | TRANSMEMBRANE GENERAL SECRETORY PATHWAY PROTEIN J                             | I.V.E.2  |
| RSc3111 | RS00564 |       |      |       |      |       |      |       |      | TRANSMEMBRANE GENERAL SECRETORY PATHWAY PROTEIN K                             | I.V.E.2  |
| RSc3112 | RS00565 |       |      |       |      |       |      |       |      | TRANSMEMBRANE GENERAL SECRETORY PATHWAY PROTEIN L                             | I.V.E.2  |
| RSc3113 | RS00566 |       |      |       |      |       |      |       |      | TRANSMEMBRANE GENERAL SECRETORY PATHWAY PROTEIN M                             | I.V.E.2  |
| RSc3114 | RS00567 |       |      |       |      |       |      |       |      | TRANSMEMBRANE GENERAL SECRETORY PATHWAY PROTEIN N                             | I.V.E.2  |
| RSc3115 | RS00568 |       |      |       |      |       |      |       |      | TRANSMEMBRANE GENERAL SECRETORY PATHWAY PROTEIN D                             | I.V.E.2  |
| RSc3116 | RS00569 |       |      |       |      |       |      |       |      | GENERAL SECRETION PATHWAY PROTEIN E                                           | I.V.E.2  |
| RSc3117 | RS00571 |       |      |       |      |       |      |       |      | TRANSMEMBRANE GENERAL SECRETORY PATHWAY PROTEIN F                             | I.V.E.2  |
| RSc3118 | RS00572 |       |      |       |      |       |      |       |      | TRANSMEMBRANE                                                                 | V.I.C    |
| RSc3119 | RS00574 |       |      |       |      |       |      |       |      | TRANSMEMBRANE                                                                 | V.I.C    |
| RSc3120 | RS00575 |       |      |       |      |       |      |       |      | TRANSCRIPTION REGULATOR                                                       | V.I.A    |
| RSc3121 | RS00576 |       |      |       |      |       |      |       |      | COG3467, Flavir-nucleotide-binding protein                                    | V.I.C    |
| RSc3122 | RS00577 |       |      |       |      |       |      |       |      | HYPOTHETICAL PROTEIN                                                          | V.I.D    |
| RSc3124 | RS00480 |       |      |       |      |       |      |       |      | OXIDOREDUCTASE COG4231, Indolepyruvate ferredoxin oxidoreductase, alpha and I | V.I.D    |
| RSc3125 | RS00478 | 0.92  | 0.01 |       |      |       |      |       |      | HYPOTHETICAL PROTEIN                                                          | V.I.D    |
| RSc3126 | RS00477 | 1.34  | 0.00 |       |      |       |      |       |      | EXODEOXYRIBONUCLEASE I                                                        | I.I.A.1  |
| RSc3127 | RS00476 | 0.93  | 0.01 |       |      |       |      |       |      | ETHANOLAMINE AMMONIA-LYASE SMALL SUBUNIT                                      | I.I.2    |
| RSc3128 | RS00475 | 0.98  | 0.02 |       |      |       |      |       |      | ETHANOLAMINE AMMONIA-LYASE HEAVY CHAIN                                        | I.I.2    |
| RSc3129 | RS00474 |       |      |       |      |       |      |       |      | OXIDOREDUCTASE NAD+ DEPENDENT ACETALDEHYDE DEHYDROGENASE                      | I.I      |
| RSc3130 | RS00473 | 0.93  | 0.00 |       |      |       |      |       |      | TRANSCRIPTION REGULATOR ACETOIN CATABOLISM REGULATORY PROTEIN I               | I        |
| RSc3131 | RS00472 | 1.15  | 0.01 |       |      |       |      |       |      | OXIDOREDUCTASE PROPANOL-PREFERRING ALCOHOL DEHYDROGENASE                      | I.H.2    |
| RSc3132 | RS00471 | 1.07  | 0.01 |       |      |       |      |       |      | OXIDOREDUCTASE D-LACTATE DEHYDROGENASE (D-LDH)                                | I.F      |
| RSc3133 | RS00470 |       |      |       |      |       |      |       |      | TRANSCRIPTION REGULATOR                                                       | V.I.A    |
| RSc3134 | RS00469 |       |      |       |      |       |      |       |      | ANTIBIOTIC RESISTANCE (ACETYLTTRANSFERASE)                                    | I.V.G.4  |
| RSc3135 | RS00468 |       |      |       |      |       |      |       |      | TRANSMEMBRANE MSF TRANSPORTER                                                 | I.V.D    |
| RSc3136 | RS00467 |       |      |       |      |       |      |       |      | CONSERVED HYPOTHETICAL PROTEIN                                                | V.I.C    |
| RSc3137 | RS00466 |       |      |       |      |       |      |       |      | TRANSMEMBRANE METHYL-ACCEPTING CHEMOTAXIS PROTEIN                             | I.V.C    |
| RSc3138 | RS00465 |       |      |       |      |       |      |       |      | CONSERVED HYPOTHETICAL PROTEIN                                                | V.I.C    |
| RSc3139 | RS00464 |       |      |       |      |       |      |       |      | OXIDOREDUCTASE                                                                | I.I      |
| RSc3140 | RS00463 | 0.84  | 0.05 |       |      |       |      |       |      | TRANSCRIPTION REGULATOR                                                       | V.I.A    |
| RSc3141 | RS00462 | 1.30  | 0.02 |       |      |       |      |       |      | SERINE PROTEASE                                                               | I.I.A.4  |
| RSc3142 | RS00461 | 1.07  | 0.04 |       |      |       |      |       |      | TRANSMEMBRANE LIPOPROTEIN                                                     | V.I.D    |
| RSc3143 | RS00460 |       |      |       |      |       |      |       |      | TRANSMEMBRANE TRANSPORT PROTEIN                                               | I.V.D    |
| RSc3144 | RS00459 |       |      |       |      |       |      |       |      | TRANSMEMBRANE SIGNAL TRANSDUCTION PROTEIN GGDEF DOMAIN                        | V.I.A    |
| RSc3145 | RS00458 |       |      |       |      |       |      |       |      | CONSERVED HYPOTHETICAL PROTEIN                                                | V.I.C    |
| RSc3146 | RS00457 | 1.81  | 0.00 |       |      |       |      |       |      | ISRsso9-TRANSPOSASE                                                           | V.A      |
| RSc3147 | RS00456 |       |      |       |      |       |      |       |      | HYPOTHETICAL PROTEIN                                                          | V.I.D    |
| RSc3148 | RS00455 |       |      |       |      |       |      |       |      | ABC TRANSPORTER COG0683, ABC-type branched-chain amino acid transport syst    | I.V.D    |
| RSc3149 | RS00451 |       |      |       |      |       |      |       |      | TRANSMEMBRANE                                                                 | V.I.B    |
| RSc3150 | RS00450 |       |      |       |      |       |      |       |      | TRANSCRIPTION REGULATOR                                                       | V.I.A    |
| RSc3151 | RS00448 |       |      |       |      |       |      |       |      | TRANSMEMBRANE                                                                 | V.I.C    |
| RSc3152 | RS00447 |       |      |       |      |       |      |       |      | OXIDOREDUCTASE TRYPTOPHAN 2-MONOXYGENASE                                      | V.I.C    |
| RSc3153 | RS00446 |       |      |       |      |       |      |       |      | OXIDOREDUCTASE COG1091, dTDP-4-dehydrohamnose reductase                       | I.II.B   |
| RSc3154 | RS00444 | 0.59  | 0.01 |       |      |       |      |       |      | HYPOTHETICAL PROTEIN                                                          | V.I.D    |
| RSc3155 | RS00443 |       |      |       |      |       |      |       |      | SIGNAL PEPTIDE                                                                | V.I.C    |
| RSc3156 | RS00442 |       |      |       |      |       |      |       |      | SIGNAL PEPTIDE HYDROLASE                                                      | I.I      |
| RSc3157 | RS00441 |       |      |       |      |       |      |       |      | TRANSCRIPTION REGULATOR COLD SHOCK-LIKE PROTEIN CSPC                          | V.I.A    |
| RSc3158 | RS00440 |       |      |       |      |       |      |       |      | CONSERVED HYPOTHETICAL PROTEIN                                                | V.I.C    |
| RSc3159 | RS00439 |       |      |       |      |       |      |       |      | TRANSMEMBRANE COG2081, Flavoprotein                                           | V.I.C    |
| RSc3160 | RS00438 |       |      |       |      |       |      |       |      | COG2890, Methylase of polypeptide chain release factors                       | I.II.B.7 |
| RSc3161 | RS00437 |       |      |       |      |       |      |       |      | TRANSCRIPTION REGULATOR TWO COMPONENT SENSOR HISTIDINE KINASE                 | V.I.A    |
| RSc3162 | RS00436 |       |      |       |      |       |      |       |      | TRANSCRIPTION REGULATOR TWO COMPONENT RESPONSE REGULATOR                      | V.I.A    |
| RSc3163 | RS00435 |       |      |       |      |       |      |       |      | HEMAGGLUTININ-RELATED AUTOTRANSFER PROTEIN                                    | I.II.A   |
| RSc3164 | RS00434 |       |      |       |      |       |      |       |      | TPR DOMAIN PROTEIN                                                            | V.I.C    |
| RSc3165 | RS00433 |       |      |       |      |       |      |       |      | CONSERVED HYPOTHETICAL PROTEIN                                                | V.I.C    |
| RSc3166 | RS00432 |       |      |       |      |       |      |       |      | TRANSMEMBRANE                                                                 | V.I.C    |
| RSc3167 | RS00430 |       |      |       |      |       |      |       |      | ADENYLYLSULFATE KINASE (APS KINASE)                                           | I.F.3    |
| RSc3168 | RS00429 |       |      |       |      |       |      |       |      | TPR DOMAIN PROTEIN                                                            | V.I.B    |
| RSc3169 | RS01160 |       |      |       |      |       |      |       |      | ISRsso13-TRANSPOSASE                                                          | V.A      |
| RSc3170 | RS00428 |       |      |       |      |       |      |       |      | TRANSMEMBRANE PSEUDOGENE (TRANSPORT PROTEIN, FRAGMENT)                        | V.I.C    |
| RSc3171 | RS00427 |       |      |       |      |       |      |       |      | BACTERIOPHAGE-RELATED PROTEIN                                                 | V.I.D    |
| RSc3172 | RS00426 |       |      |       |      |       |      |       |      | SITE-SPECIFIC INTEGRASE/Resolvase                                             | V        |
| RSc3173 | RS00425 |       |      |       |      |       |      |       |      | BACTERIOPHAGE-RELATED PROTEIN                                                 | V.D      |
| RSc3174 | RS04746 | 0.47  | 0.04 |       |      |       |      |       |      | BACTERIOPHAGE-RELATED PROTEIN                                                 | V.D      |
| RSc3175 | RS01339 |       |      |       |      |       |      |       |      | HYPOTHETICAL PROTEIN                                                          | V.I.B    |
| RSc3176 | RS05984 |       |      |       |      |       |      |       |      | TRANSMEMBRANE                                                                 | V.I.D    |
| RSc3177 | RS00423 |       |      |       |      |       |      |       |      | ACETYLTTRANSFERASE                                                            | I        |
| RSc3178 | RS05983 |       |      |       |      |       |      |       |      | CONSERVED HYPOTHETICAL PROTEIN                                                | V.I.C    |
| RSc3179 | RS00422 |       |      |       |      |       |      |       |      | CONSERVED HYPOTHETICAL PROTEIN                                                | V.I.C    |
|         |         |       |      |       |      |       |      |       |      | Transposase                                                                   | V.A      |





|         |         |       |      |       |      |       |      |         |                                                                                                     |         |
|---------|---------|-------|------|-------|------|-------|------|---------|-----------------------------------------------------------------------------------------------------|---------|
| RSc3295 | RS02524 | 1.27  | 0.01 | -0.75 | 0.01 | -0.79 | 0.00 | gcvP    | OXIDOREDUCTASE TRANSMEMBRANE GLYCINE DEHYDROGENASE [DECARBONYLATION]                                | I.18    |
| RSc3296 | RS02527 | 1.81  | 0.03 | -0.83 | 0.01 | 2.20  | 0.00 | sdaA2   | L-SERINE AMONYA-LYASE, L-SERINE DEHYDRATASE 2 (L-SERINE DEAMINASE)                                  | I.1.3   |
| RSc3297 | RS02525 |       |      | -0.57 | 0.00 |       |      |         | TRANSMEMBRANE                                                                                       | V.I.C   |
| RSc3298 | RS02526 |       |      | -0.51 | 0.01 |       |      |         | CONSERVED HYPOTHETICAL PROTEIN                                                                      | V.I.C   |
| RSc3299 | RS02528 | 0.66  | 0.03 |       |      | 1.20  | 0.01 |         | TRANSMEMBRANE                                                                                       | V.I.C   |
| RSc3300 | RS02529 | 0.76  | 0.00 | -0.99 | 0.00 | 0.98  | 0.04 | putA    | SIGNAL PEPTIDE AMINO-ACID TRANSPORT PROTEIN                                                         | IV.D.2  |
| RSc3301 | RS02530 |       |      | -1.08 | 0.00 | 0.88  | 0.04 | priA    | OXIDOREDUCTASE BIFUNCTIONAL PROTEIN: PROLINE DEHYDROGENASE AND                                      | I.1.3   |
| RSc3302 | RS02531 | 0.45  | 0.01 | -0.55 | 0.00 | -0.93 | 0.03 | hemE    | PRIMOSOMAL PROTEIN N' (REPLICATION FACTOR Y)                                                        | II.B.8  |
| RSc3303 | RS02532 | 0.59  | 0.01 |       |      |       |      |         | UROPORPHYRINOGEN DECARBOXYLASE                                                                      | I.B.4   |
| RSc3304 | RS02533 |       |      | -0.52 | 0.00 |       |      |         | SIGNAL PEPTIDE                                                                                      | V.I.C   |
| RSc3305 | RS02534 |       |      | -1.14 | 0.00 | 0.89  | 0.02 |         | CONSERVED HYPOTHETICAL PROTEIN                                                                      | V.I.C   |
| RSc3306 | RS02535 |       |      | -1.21 | 0.00 |       |      |         | HYPOTHETICAL PROTEIN                                                                                | V.I.D   |
| RSc3307 | RS02536 | 0.35  | 0.02 | -0.61 | 0.00 |       |      |         | TRANSMEMBRANE METHYL-ACCEPTING CHEMOTAXIS PROTEIN                                                   | IV.C    |
| RSc3308 | RS02537 | 0.99  | 0.01 | -0.73 | 0.04 |       |      | gstM    | TRANSCRIPTION REGULATOR                                                                             | V.I.A   |
| RSc3309 | RS02538 |       |      |       |      |       |      | gstM    | GLUTATHIONE S-TRANSFERASE                                                                           | II.B.7  |
| RSc3310 | RS02539 |       |      |       |      |       |      | pstS2   | ABC TRANSPORTER PHOSPHATE-BINDING PERIPLASMIC PROTEIN PRECURSOR                                     | I.F.20  |
| RSc3311 | RS02540 |       |      | -1.29 | 0.00 | 0.98  | 0.01 |         | HYPOTHETICAL PROTEIN                                                                                | V.I.D   |
| RSc3312 | RS02542 | 0.54  | 0.01 |       |      |       |      |         | ESTERASE / LIPASE                                                                                   | I.I.1   |
| RSc3313 | RS02543 |       |      | -0.69 | 0.00 | -0.79 | 0.03 |         | CONSERVED HYPOTHETICAL PROTEIN                                                                      | V.I.C   |
| RSc3314 | RS02544 |       |      | -1.16 | 0.00 |       |      |         | SIGNAL PEPTIDE                                                                                      | V.I.D   |
| RSc3315 | RS02545 |       |      |       |      | 2.74  | 0.00 |         | TRANSMEMBRANE                                                                                       | V.I.C   |
| RSc3316 | RS02546 | 0.83  | 0.01 |       |      | -0.60 | 0.04 | atpC1   | ATP SYNTHASE EPSILON CHAIN                                                                          | I.E.2   |
| RSc3317 | RS02547 | 0.90  | 0.00 |       |      | 1.51  | 0.00 | atpD    | ATP SYNTHASE BETA CHAIN                                                                             | I.E.2   |
| RSc3318 | RS02548 | 0.72  | 0.00 |       |      | 0.97  | 0.00 | atpG    | ATP SYNTHASE GAMMA CHAIN                                                                            | I.E.2   |
| RSc3319 | RS02549 | -0.27 | 0.04 | 0.89  | 0.00 | -0.22 | 0.02 | atpA    | ATP SYNTHASE ALPHA CHAIN                                                                            | I.E.2   |
| RSc3320 | RS02550 |       |      |       |      | 1.00  | 0.00 | atpH    | ATP SYNTHASE DELTA CHAIN                                                                            | I.E.2   |
| RSc3321 | RS02551 | 0.61  | 0.02 |       |      | 0.81  | 0.00 | atpF    | TRANSMEMBRANE ATP SYNTHASE B CHAIN                                                                  | I.E.2   |
| RSc3322 | RS02552 | 0.60  | 0.00 |       |      | 0.88  | 0.00 | atpE    | TRANSMEMBRANE ATP SYNTHASE C CHAIN (LIPID-BINDING PROTEIN)                                          | I.E.2   |
| RSc3323 | RS02553 | 0.87  | 0.01 |       |      | 1.01  | 0.00 | atpB    | TRANSMEMBRANE ATP SYNTHASE A CHAIN                                                                  | I.E.2   |
| RSc3324 | RS02554 |       |      | -0.32 | 0.02 |       |      | atpI    | TRANSMEMBRANE FOF1-type ATP synthase, subunit I                                                     | I.E.2   |
| RSc3325 | RS02555 | 0.67  | 0.01 | -0.34 | 0.03 |       |      | parB2   | CHROMOSOME PARTITIONING PROTEIN PARB                                                                | IV.A    |
| RSc3326 | RS02560 | 0.60  | 0.02 | -0.27 | 0.04 |       |      | parA2   | CHROMOSOME PARTITIONING PROTEIN PARA                                                                | IV.A    |
| RSc3327 | RS02561 |       |      | -0.36 | 0.04 |       |      | gidB    | GLUCOSE INHIBITED DIVISION PROTEIN B                                                                | IV.A    |
| RSc3328 | RS02562 | 0.89  | 0.03 |       |      | 0.52  | 0.04 | gidA    | GLUCOSE INHIBITED DIVISION PROTEIN A                                                                | IV.A    |
| RSc3329 | RS02563 |       |      | -0.83 | 0.00 |       |      |         | ABC TRANSPORTER AMINO-ACID-BINDING PERIPLASMIC PROTEIN (BPB)                                        | IV.D.2  |
| RSc3330 | RS02564 |       |      | -0.56 | 0.00 | -0.64 | 0.01 |         | SIGNAL PEPTIDE                                                                                      | V.I.D   |
| RSc3331 | RS02565 |       |      | -0.45 | 0.05 |       |      |         | COG1028, Dehydrogenases with different specificities (related to short-chain alcohol dehydrogenase) | I       |
| RSc3332 | RS02566 |       |      | 0.67  | 0.00 | -0.92 | 0.01 |         | TRANSCRIPTION REGULATOR                                                                             | V.I.A   |
| RSc3333 | RS02567 |       |      |       |      |       |      |         | CONSERVED HYPOTHETICAL PROTEIN                                                                      | V.I.C   |
| RSc3334 | RS02568 |       |      |       |      | 1.33  | 0.03 |         | TRANSCRIPTION REGULATOR                                                                             | V.I.A   |
| RSc3335 | RS02569 |       |      | -1.24 | 0.01 | 1.94  | 0.00 |         | COG451, Nucleoside-diphosphate-sugar epimerase                                                      | I       |
| RSc3336 | RS02570 | -0.75 | 0.02 | -0.73 | 0.00 |       |      |         | CONSERVED HYPOTHETICAL PROTEIN                                                                      | V.I.C   |
| RSc3337 | RS02571 | 1.49  | 0.04 | -0.52 | 0.05 |       |      |         | TRANSMEMBRANE COG0730, Permease                                                                     | IV.D    |
| RSc3338 | RS02572 |       |      | -0.40 | 0.00 |       |      |         | TRANSMEMBRANE                                                                                       | V.I.D   |
| RSc3339 | RS02574 |       |      | -1.37 | 0.00 | -0.39 | 0.04 |         | HYPOTHETICAL PROTEIN                                                                                | V.I.B   |
| RSc3340 | RS02575 |       |      |       |      |       |      |         | ABC TRANSPORTER TRANSMEMBRANE PROTEIN                                                               | IV.D    |
| RSc3341 | RS02576 |       |      |       |      |       |      |         | ABC TRANSPORTER TRANSMEMBRANE PROTEIN                                                               | IV.D    |
| RSc3342 | RS02578 |       |      | -0.58 | 0.00 |       |      |         | ABC TRANSPORTER SUBSTRATE-BINDING PERIPLASMIC PROTEIN (BPB)                                         | IV.D    |
| RSc3343 | RS02579 |       |      | -0.70 | 0.06 |       |      |         | ABC TRANSPORTER ATP-BINDING PROTEIN                                                                 | IV.D    |
| RSc3344 | RS02581 |       |      | -0.74 | 0.00 |       |      |         | ABC TRANSPORTER ATP-BINDING PROTEIN                                                                 | IV.D    |
| RSc3345 | RS02583 | 0.47  | 0.04 |       |      |       |      | betA    | OXIDOREDUCTASE CHOLINE DEHYDROGENASE LIPOPROTEIN                                                    | I.F     |
| RSc3346 | RS02584 | 0.34  | 0.04 | -0.71 | 0.01 |       |      |         | LYSOPHOSPHOLIPASE                                                                                   | I.I.1   |
| RSc3347 | RS02622 |       |      | -1.71 | 0.00 |       |      |         | TRANSCRIPTION REGULATOR                                                                             | V.I.A   |
| RSc3348 | RS02623 |       |      | -1.53 | 0.00 |       |      |         | TRANSMEMBRANE CATION-TRANSPORTING ATPASE                                                            | IV.D.4  |
| RSc3349 | RS02624 |       |      | -1.63 | 0.00 | -2.04 | 0.00 | copZ    | COG2608, Copper chaperone                                                                           | IV.G.4  |
| RSc3350 | RS02625 |       |      | -0.71 | 0.00 |       |      | ompW    | SIGNAL PEPTIDE OUTER MEMBRANE PROTEIN W                                                             | III.B.2 |
| RSc3352 | RS02627 |       |      | -0.68 | 0.00 |       |      |         | COG2423, Ornithine cyclodeaminase                                                                   | I       |
| RSc3353 | RS02628 | 0.55  | 0.01 | -0.60 | 0.00 |       |      |         | TRANSMEMBRANE                                                                                       | V.I.C   |
| RSc3354 | RS02629 |       |      | -0.56 | 0.00 | -0.89 | 0.00 |         | TRANSCRIPTION REGULATOR                                                                             | V.I.C   |
| RSc3355 | RS02630 |       |      | -0.56 | 0.05 |       |      | phhA    | OXIDOREDUCTASE PHENYLALANINE 4-HYDROXYLASE                                                          | I.I.3   |
| RSc3356 | RS02631 |       |      |       |      |       |      | phhB    | PTERIN-4-ALPHA-CARBINOLAMINE DEHYDRATASE                                                            | I       |
| RSc3357 | RS02632 |       |      | -0.66 | 0.00 | -0.50 | 0.02 |         | HYPOTHETICAL PROTEIN                                                                                | V.I.D   |
| RSc3358 | RS02633 |       |      |       |      |       |      |         | SET DOMAIN PROTEIN                                                                                  | V.I.C   |
| RSc3359 | RS02634 |       |      |       |      | -0.33 | 0.05 | dbhB    | HISTONE-LIKE DNA-BINDING PROTEIN HU-BETA (NS1)                                                      | II.C.1  |
| RSc3360 | RS02635 |       |      | -0.67 | 0.01 | -0.32 | 0.05 |         | TRANSMEMBRANE                                                                                       | V.I.C   |
| RSc3361 | RS02636 |       |      | -0.73 | 0.00 |       |      |         | OXIDOREDUCTASE COG1893, Ketopantoate reductase                                                      | I       |
| RSc3362 | RS02637 |       |      |       |      | 0.74  | 0.01 |         | CONSERVED HYPOTHETICAL PROTEIN                                                                      | V.I.C   |
| RSc3363 | RS02638 |       |      | -0.36 | 0.05 |       |      | cpdB    | TRANSMEMBRANE 2',3'-CYCLIC-NUCLEOTIDE 2'-PHOSPHODIESTERASE PRECURSOR                                | I.F.1   |
| RSc3364 | RS02639 |       |      |       |      |       |      | minC    | CELL DIVISION INHIBITOR                                                                             | IV.A    |
| RSc3365 | RS02640 |       |      | -0.38 | 0.00 | 0.32  | 0.04 | minD    | SEPTUM SITE-DETERMINING PROTEIN MIND                                                                | IV.A    |
| RSc3366 | RS02641 | 0.49  | 0.00 | -0.37 | 0.00 | -1.15 | 0.00 | minE    | CELL DIVISION TOPOLOGICAL SPECIFICITY FACTOR                                                        | IV.A    |
| RSc3367 | RS02642 |       |      | -0.84 | 0.00 |       |      |         | COG1804, CaIb, Predicted acyl-CoA transferases/carnitine dehydratase                                | I       |
| RSc3368 | RS02643 |       |      | -2.28 | 0.00 | 2.63  | 0.00 | comJ    | COG2961, Protein involved in catabolism of external DNA                                             | II      |
| RSc3369 | RS02644 |       |      | -0.57 | 0.02 | -0.45 | 0.03 |         | AVRPPHE AVIRULENCE PROTEIN-HOMOLOG                                                                  | V.I.B   |
| RSc3370 | RS02645 |       |      |       |      | 0.97  | 0.04 |         | COG1254, ACYLPHOSPHATASE                                                                            | I.H     |
| RSc3371 | RS02646 | 0.71  | 0.00 |       |      |       |      |         | ABC TRANSPORTER TRANSMEMBRANE PROTEIN                                                               | IV.D    |
| RSc3372 | RS02647 | 0.72  | 0.00 | -0.51 | 0.03 |       |      |         | ABC TRANSPORTER COMPOSITE ATP-BINDING TRANSMEMBRANE PROTEIN                                         | IV.D    |
| RSc3373 | RS02648 |       |      |       |      |       |      |         | TRANSCRIPTION REGULATOR                                                                             | V.I.A   |
| RSc3374 | RS02649 |       |      | -0.54 | 0.00 | -0.56 | 0.01 | pfs     | BIFUNCTIONAL PROTEIN (MTA/SAH NUCLEOSIDASE) (P46); 5'-METHYLTHIOADENOSINE                           | I.F.9   |
| RSc3375 | RS02660 |       |      | -1.07 | 0.00 | 1.26  | 0.00 |         | CONSERVED HYPOTHETICAL PROTEIN                                                                      | V.I.C   |
| RSc3376 | RS02650 | 0.60  | 0.04 | -1.68 | 0.00 | 2.67  | 0.00 |         | SIGNAL PEPTIDE                                                                                      | V.I.C   |
| RSc3377 | RS02651 | 1.53  | 0.01 | -1.80 | 0.00 | 1.30  | 0.00 |         | CONSERVED HYPOTHETICAL PROTEIN                                                                      | V.I.C   |
| RSc3378 | RS02652 |       |      | -2.03 | 0.00 | 1.10  | 0.00 |         | COG1502, Phosphatidylserine/phosphatidylglycerophosphate/cardiopolin synthases and                  | I       |
| RSc3379 | RS02653 |       |      | -0.37 | 0.00 |       |      |         | SIGNAL PEPTIDE                                                                                      | V.I.C   |
| RSc3380 | RS02654 |       |      | -0.80 | 0.00 | -0.33 | 0.04 |         | SIGNAL PEPTIDE                                                                                      | V.I.D   |
| RSc3381 | RS02655 |       |      | -1.16 | 0.00 |       |      |         | TRANSMEMBRANE                                                                                       | V.I.D   |
| RSc3382 | RS02656 |       |      |       |      |       |      | kdpA    | TRANSMEMBRANE POTASSIUM-TRANSPORTING ATPASE A CHAIN                                                 | IV.D.4  |
| RSc3383 | RS02657 |       |      |       |      |       |      | kdpB    | TRANSMEMBRANE POTASSIUM-TRANSPORTING ATPASE (B CHAIN)                                               | IV.D.4  |
| RSc3384 | RS02658 |       |      |       |      |       |      | kdpC    | TRANSMEMBRANE POTASSIUM-TRANSPORTING ATPASE C CHAIN                                                 | IV.D.4  |
| RSc3385 | RS02659 |       |      |       |      |       |      | kdpD    | TRANSCRIPTION REGULATOR TWO-COMPONENT SENSOR KINASE PROTEIN KIV.D                                   | I       |
| RSc3386 | RS05666 |       |      |       |      | -2.30 | 0.02 |         | ABC TRANSPORTER COG1464, ABC-type metal ion transport system, periplasmic component                 | IV.D.5  |
| RSc3387 | RS05667 |       |      | -0.78 | 0.00 | 0.48  | 0.03 |         | TRANSCRIPTION REGULATOR TWO-COMPONENT RESPONSE REGULATOR WITH                                       | V.I.A   |
| RSc3388 | RS05668 |       |      |       |      |       |      |         | TRANSCRIPTION REGULATOR TWO-COMPONENT RESPONSE REGULATOR WITH                                       | V.I.A   |
| RSc3389 | RS05670 |       |      |       |      |       |      |         | HYPOTHETICAL PROTEIN                                                                                | V.I.B   |
| RSc3390 | RS05671 |       |      |       |      |       |      |         | SIGNAL PEPTIDE PORIN                                                                                | IV      |
| RSc3391 | RS05672 |       |      |       |      |       |      |         | ABC TRANSPORTER COG0715, ABC-type nitrate/sulfonate/bicarbonate transport system                    | IV.D    |
| RSc3392 | RS05673 |       |      |       |      |       |      |         | TRANSCRIPTION REGULATOR RESPONSE REGULATOR                                                          | V.I.A   |
| RSc3393 | RS05676 |       |      | -0.60 | 0.00 |       |      | tISRsof | ISRso5-TRANSPOSASE                                                                                  | V.A     |
| RSc3394 | RS05675 |       |      |       |      |       |      |         | RESTRICTION MODIFICATION ENZYME R SUBUNIT                                                           | II.B.8  |
| RSc3395 | RS01703 |       |      |       |      |       |      |         | CONSERVED HYPOTHETICAL PROTEIN                                                                      | V.I.C   |
| RSc3396 | RS01704 |       |      |       |      |       |      |         | TYPE I RESTRICTION ENZYME M PROTEIN                                                                 | II.B.8  |
| RSc3397 | RS01705 |       |      | -0.83 | 0.00 | -0.78 | 0.04 |         | TRANSCRIPTION REGULATOR COG1959                                                                     | V.I.A   |
| RSc3398 | RS01706 | -0.76 | 0.03 |       |      |       |      |         | TRANSMEMBRANE FLAVOHEMOPROTEIN (HEMOGLOBIN-LIKE PROTEIN)                                            | I.G.1   |
| RSc3399 | RS01707 |       |      |       |      |       |      |         | TRANSMEMBRANE                                                                                       | V.I.C   |
| RSc3400 | RS01708 | 0.75  | 0.03 |       |      |       |      |         | TRANSMEMBRANE TRANSPORTER                                                                           | IV.D    |
| RSc3401 | RS01709 |       |      |       |      |       |      |         | SKWP PROTEIN 1                                                                                      | V.I.C   |
| RSc3402 | RS01711 | -0.82 | 0.00 | 1.07  | 0.02 |       |      |         | TRANSMEMBRANE                                                                                       | V.I.B   |
| RSc3403 | RS01712 |       |      | -0.72 | 0.03 |       |      |         | TRANSCRIPTION REGULATOR TWO-COMPONENT SENSOR KINASE                                                 | V.I.A   |
| RSc3404 | RS01713 |       |      | -0.53 | 0.01 |       |      |         | TRANSCRIPTION REGULATOR RESPONSE REGULATOR                                                          | V.I.A   |
| RSc3405 | RS01714 | -0.37 | 0.03 |       |      |       |      |         | TRANSMEMBRANE                                                                                       | V.I.C   |
| RSc3406 | RS01715 |       |      |       |      |       |      |         | COG0596, Predicted hydrolases or acyltransferases (alpha/beta hydrolase superfamily)                | I       |
| RSc3407 | RS01716 |       |      |       |      |       |      |         | OXIDOREDUCTASE COG0665, Glycine/D-amino acid oxidase (deaminating)                                  | I.I.3   |



|         |         |  |      |      |       |      |       |       |       |      |                                                                              |                                   |                                         |       |
|---------|---------|--|------|------|-------|------|-------|-------|-------|------|------------------------------------------------------------------------------|-----------------------------------|-----------------------------------------|-------|
| RSp0081 | RS05540 |  | 0,60 | 0,03 | -2,21 | 0,00 | -1,11 | 0,00  | 1,98  | 0,00 | CONSERVED HYPOTHETICAL PROTEIN                                               | V.I.C                             |                                         |       |
| RSp0082 | RS05556 |  |      |      |       |      |       |       |       |      | HYPOTHETICAL PROTEIN                                                         | V.I.D                             |                                         |       |
| RSp0083 | RS05555 |  |      |      | -0,83 | 0,00 |       |       |       |      | HYPOTHETICAL PROTEIN                                                         | V.I.D                             |                                         |       |
| RSp0084 | RS05553 |  |      |      | -0,70 | 0,04 |       |       |       |      | HYPOTHETICAL PROTEIN                                                         | V.I.D                             |                                         |       |
| RSp0085 | RS05538 |  | 0,92 | 0,01 | -0,85 | 0,01 |       |       |       |      | RHS-RELATED PROTEIN                                                          | V.I.B                             |                                         |       |
| RSp0086 | RS05537 |  |      |      |       |      |       |       | 1,76  | 0,00 | RHS-RELATED PROTEIN                                                          | V.I.C                             |                                         |       |
| RSp0087 | RS05535 |  |      |      | 1,17  | 0,01 | -0,68 | 0,01  |       |      | CONSERVED HYPOTHETICAL PROTEIN                                               | V.I.C                             |                                         |       |
| RSp0088 | RS05533 |  |      |      |       |      |       |       |       |      | HYPOTHETICAL PROTEIN                                                         | V.I.D                             |                                         |       |
| RSp0089 | RS05532 |  |      |      | -0,63 | 0,02 |       |       |       |      | HYPOTHETICAL PROTEIN                                                         | V.I.D                             |                                         |       |
| RSp0090 | RS05531 |  |      |      |       |      |       |       |       |      | INTEGRASE/RECOMBINASE                                                        | V                                 |                                         |       |
| RSp0091 | RS05552 |  |      |      |       |      |       | -0,93 | 0,00  |      | HYPOTHETICAL PROTEIN                                                         | V.I.D                             |                                         |       |
| RSp0092 | RS05551 |  |      |      |       |      |       | -1,00 | 0,05  |      | HYPOTHETICAL PROTEIN                                                         | V.I.D                             |                                         |       |
| RSp0093 | RS05871 |  |      |      | -2,62 | 0,01 | 3,45  | 0,00  |       |      | TIS1421 TIS1421-transposase ORFB                                             | V.A                               |                                         |       |
| RSp0094 | RS05870 |  |      |      |       |      | -0,75 | 0,00  |       |      | TIS1421 TIS1421-transposase ORFA                                             | V.A                               |                                         |       |
| RSp0095 | RS06004 |  |      |      | -0,54 | 0,00 |       |       |       |      | HYPOTHETICAL PROTEIN                                                         | V.I.D                             |                                         |       |
| RSp0096 | RS05526 |  |      |      |       |      |       |       |       |      | RHS-RELATED PROTEIN                                                          | V.I.C                             |                                         |       |
| RSp0097 | RS05527 |  |      |      |       |      | 1,40  | 0,00  | -0,62 | 0,04 | ANKYRIN-REPEAT HARBORING PROTEIN                                             | V.I.B                             |                                         |       |
| RSp0098 | RS05528 |  |      |      | -2,97 | 0,00 | -5,01 | 0,00  | 2,88  | 0,00 | HYPOTHETICAL PROTEIN                                                         | V.I.D                             |                                         |       |
| RSp0099 | RS03024 |  |      |      | -2,65 | 0,00 | -4,53 | 0,00  | 3,08  | 0,00 | 3,05                                                                         | 0,00                              | ripA TYPE III EFFECTOR PROTEIN AWR1     | V.I.E |
| RSp0100 | RS03023 |  |      |      | -1,01 | 0,01 | 0,80  | 0,03  | -2,38 | 0,00 |                                                                              | FERRISIDEROPHORE RECEPTOR PROTEIN | IV.D.5                                  |       |
| RSp0101 | RS03022 |  |      |      |       |      | 0,30  | 0,03  | 1,04  | 0,00 |                                                                              | CONSERVED HYPOTHETICAL PROTEIN    | V.I.C                                   |       |
| RSp0102 | RS03021 |  |      |      |       |      | -0,59 | 0,00  |       |      | COG3293, Transposase and inactivated derivatives                             | V.A                               |                                         |       |
| RSp0103 | RS03020 |  |      |      |       |      | -0,84 | 0,00  |       |      | VGR-RELATED PROTEIN                                                          | V.I.C                             |                                         |       |
| RSp0104 | RS03019 |  |      |      |       |      | -0,90 | 0,00  |       |      | TRANSMEMBRANE                                                                | V.I.C                             |                                         |       |
| RSp0105 | RS03018 |  |      |      |       |      | -1,09 | 0,00  |       |      | CONSERVED HYPOTHETICAL PROTEIN                                               | V.I.C                             |                                         |       |
| RSp0106 | RS03016 |  |      |      |       |      |       |       |       |      | SIGNAL PEPTIDE MOLYBDATE-BINDING PERIPLASMIC PROTEIN                         | IV.D.1                            |                                         |       |
| RSp0107 | RS03015 |  |      |      |       |      | -0,80 | 0,00  | 1,32  | 0,01 | TRANSMEMBRANE TRANSPORT PROTEIN                                              | V.I.C                             |                                         |       |
| RSp0108 | RS03014 |  |      |      |       |      | -0,72 | 0,00  |       |      | TRANSCRIPTION REGULATOR                                                      | V.I.A                             |                                         |       |
| RSp0109 | RS03013 |  |      |      |       |      | -0,69 | 0,03  |       |      | COG0714, MoxR-like ATPases                                                   | V.I.C                             |                                         |       |
| RSp0110 | RS03012 |  |      |      | 0,70  | 0,01 | -0,49 | 0,00  |       |      | TRANSMEMBRANE                                                                | V.I.C                             |                                         |       |
| RSp0111 | RS03011 |  |      |      |       |      |       |       |       |      | TRANSMEMBRANE                                                                | V.I.C                             |                                         |       |
| RSp0112 | RS03010 |  |      |      |       |      |       |       |       |      | CARBONIC ANHYDRASE                                                           | I.F.18                            |                                         |       |
| RSp0113 | RS03009 |  |      |      | 0,46  | 0,02 | -0,39 | 0,01  |       |      | TRANSMEMBRANE COG0659, Sulfate permease and related transporters             | IV.D                              |                                         |       |
| RSp0114 | RS03008 |  |      |      | 0,57  | 0,04 |       |       |       |      | TRANSMEMBRANE                                                                | V.I.C                             |                                         |       |
| RSp0115 | RS03007 |  |      |      | 0,76  | 0,04 |       |       |       |      | SIGNAL PEPTIDE                                                               | V.I.B                             |                                         |       |
| RSp0116 | RS03006 |  |      |      |       |      | -1,21 | 0,01  |       |      | CONSERVED HYPOTHETICAL PROTEIN                                               | V.I.C                             |                                         |       |
| RSp0117 | RS03005 |  |      |      |       |      | -1,44 | 0,05  | -0,99 | 0,04 | HYPOTHETICAL PROTEIN                                                         | V.I.D                             |                                         |       |
| RSp0118 | RS03004 |  |      |      |       |      | -0,49 | 0,00  |       |      | HYPOTHETICAL PROTEIN                                                         | V.I.D                             |                                         |       |
| RSp0119 | RS03003 |  |      |      |       |      |       |       | -0,54 | 0,04 | TRANSMEMBRANE                                                                | V.I.C                             |                                         |       |
| RSp0120 | RS03002 |  |      |      |       |      |       |       |       |      | TRANSMEMBRANE ACONITATE HYDRATASE 1                                          | I.H.6                             |                                         |       |
| RSp0121 | RS03001 |  |      |      |       |      | -0,16 | 0,05  |       |      | METHYLCITRATE SYNTHASE (CITRATE SYNTHASE 2)                                  | I                                 |                                         |       |
| RSp0122 | RS03000 |  |      |      |       |      |       |       |       |      | prpC CARBOXYVINYL-CARBOXYPHOSPHONATE PHOSPHORYLMUTASE                        | I.I.4                             |                                         |       |
| RSp0123 | RS02999 |  |      |      |       |      |       |       |       |      | prpB2 TRANSCRIPTION REGULATOR PROPIONATE CATABOLISM OPERON REGULAT(I         | V.I.C                             |                                         |       |
| RSp0124 | RS02998 |  |      |      | 0,66  | 0,00 | -0,43 | 0,00  |       |      | TRANSMEMBRANE LIPOPROTEIN                                                    | V.I.C                             |                                         |       |
| RSp0125 | RS02997 |  |      |      |       |      | -0,52 | 0,00  |       |      | TRANSMEMBRANE PROLIN RICH PROTEIN                                            | V.I.D                             |                                         |       |
| RSp0127 | RS02994 |  |      |      |       |      | -0,63 | 0,01  |       |      | ISRso1 ISRso1 TRANSPOSASE                                                    | V.A                               |                                         |       |
| RSp0128 | RS02993 |  |      |      |       |      | -0,79 | 0,05  | 1,19  | 0,00 | COG0210, Superfamily I DNA and RNA helicases                                 | II.B.8                            |                                         |       |
| RSp0129 | RS02991 |  |      |      |       |      |       |       |       |      | HYPOTHETICAL PROTEIN                                                         | V.I.D                             |                                         |       |
| RSp0130 | RS02992 |  |      |      |       |      | -0,66 | 0,00  |       |      | 0,98                                                                         | 0,00                              | HYPOTHETICAL PROTEIN                    | V.I.B |
| RSp0131 | RS02990 |  |      |      |       |      |       |       |       |      | HYPOTHETICAL PROTEIN                                                         | V.I.D                             |                                         |       |
| RSp0132 | RS02988 |  |      |      | -0,71 | 0,00 |       |       |       |      | TRANSMEMBRANE SIGNAL TRANSDUCTION PROTEIN GGDEF DOMAIN                       | V.I.A                             |                                         |       |
| RSp0133 | RS02987 |  |      |      |       |      | -0,43 | 0,03  |       |      | TRANSMEMBRANE                                                                | V.I.C                             |                                         |       |
| RSp0134 | RS02986 |  |      |      |       |      |       |       |       |      | TRANSMEMBRANE                                                                | V.I.C                             |                                         |       |
| RSp0135 | RS02985 |  |      |      | -0,66 | 0,04 | -0,88 | 0,02  |       |      | TRANSMEMBRANE COG4257 STREPTOGRAMIN LYASE                                    | IV.F                              |                                         |       |
| RSp0136 | RS02984 |  |      |      |       |      |       |       |       |      | OXIDOREDUCTASE COG1902, NADH:flavin oxidoreductases                          | I                                 |                                         |       |
| RSp0137 | RS02983 |  |      |      |       |      | -1,10 | 0,01  | -1,59 | 0,00 | TRANSCRIPTION REGULATOR                                                      | V.I.A                             |                                         |       |
| RSp0138 | RS02982 |  |      |      | 0,44  | 0,03 | -0,36 | 0,01  | 1,43  | 0,01 | TRANSMEMBRANE PECTINESTERASE (PECTIN METHYLESTERASE)                         | II.A.3                            |                                         |       |
| RSp0139 | RS02981 |  |      |      |       |      | -0,46 | 0,00  |       |      | COG1246, N-acetylglutamate synthase and related acetyltransferases           | I                                 |                                         |       |
| RSp0140 | RS02980 |  |      |      |       |      |       |       |       |      | TRANSMEMBRANE COG2165, Type II secretory pathway, pseudopilin                | IV.E.2                            |                                         |       |
| RSp0141 | RS02979 |  |      |      |       |      |       |       |       |      | TRANSMEMBRANE GENERAL SECRETION PATHWAY GSPG RELATED PROTEIN IV.E.2          | IV.E.2                            |                                         |       |
| RSp0142 | RS02978 |  |      |      |       |      |       |       |       |      | TRANSMEMBRANE GENERAL SECRETION PATHWAY GSPG RELATED PROTEIN IV.E.2          | IV.E.2                            |                                         |       |
| RSp0143 | RS02977 |  |      |      |       |      |       |       |       |      | GSPD-RELATED PROTEIN                                                         | IV.E.2                            |                                         |       |
| RSp0144 | RS02976 |  |      |      |       |      |       |       |       |      | TRANSMEMBRANE PROLIN-RICH PROTEIN                                            | V.I.C                             |                                         |       |
| RSp0145 | RS02975 |  |      |      |       |      |       |       |       |      | TRANSMEMBRANE                                                                | V.I.C                             |                                         |       |
| RSp0146 | RS02974 |  |      |      | 0,46  | 0,05 |       |       |       |      | TRANSMEMBRANE                                                                | V.I.C                             |                                         |       |
| RSp0147 | RS02973 |  |      |      |       |      |       |       | -2,02 | 0,00 | HYPOTHETICAL PROTEIN                                                         | V.I.D                             |                                         |       |
| RSp0148 | RS02972 |  |      |      | 1,22  | 0,01 | -0,45 | 0,04  |       |      | GENERAL SECRETION PATHWAY GSPG-RELATED PROTEIN                               | IV.E.2                            |                                         |       |
| RSp0149 | RS02971 |  |      |      | 0,88  | 0,02 |       |       |       |      | TRANSMEMBRANE GENERAL SECRETION PATHWAY GSPF-RELATED PROTEIN IV.E.2          | IV.E.2                            |                                         |       |
| RSp0150 | RS02970 |  |      |      |       |      |       |       | -2,05 | 0,01 | TRANSMEMBRANE GENERAL SECRETION PATHWAY GSPG-RELATED PROTEIN IV.E.2          | IV.E.2                            |                                         |       |
| RSp0151 | RS02969 |  |      |      |       |      |       |       |       |      | RHS-RELATED PROTEIN                                                          | V.I.B                             |                                         |       |
| RSp0152 | RS02967 |  |      |      |       |      |       |       |       |      | HYPOTHETICAL PROTEIN                                                         | V.I.D                             |                                         |       |
| RSp0153 | RS06008 |  |      |      |       |      |       |       |       |      | HYPOTHETICAL PROTEIN                                                         | V.I.D                             |                                         |       |
| RSp0154 | RS06009 |  |      |      |       |      |       |       |       |      | TRANSMEMBRANE                                                                | V.I.D                             |                                         |       |
| RSp0157 | RS05520 |  |      |      |       |      |       |       |       |      | HYPOTHETICAL PROTEIN                                                         | V.I.B                             |                                         |       |
| RSp0158 | RS06026 |  |      |      | -1,08 | 0,00 | 1,45  | 0,00  |       |      | HYPOTHETICAL PROTEIN                                                         | V.I.D                             |                                         |       |
| RSp0159 | RS06025 |  |      |      | -3,70 | 0,00 | 4,47  | 0,00  | 1,39  | 0,04 | HYPOTHETICAL PROTEIN                                                         | V.I.D                             |                                         |       |
| RSp0160 | RS05518 |  |      |      | -3,62 | 0,00 | 4,13  | 0,00  | 4,62  | 0,00 | CONSERVED HYPOTHETICAL PROTEIN                                               | V.I.C                             |                                         |       |
| RSp0161 | RS05517 |  |      |      |       |      |       |       |       |      | TRANSMEMBRANE                                                                | V.I.C                             |                                         |       |
| RSp0162 | RS05516 |  |      |      |       |      | 0,63  | 0,00  | 2,59  | 0,01 | egl ENDOGLUCANASE PRECURSOR (ENDO-1,4-BETA-GLUCANASE)                        | II.A.3                            |                                         |       |
| RSp0163 | RS05515 |  |      |      |       |      | 0,64  | 0,01  |       |      | PHOSPHOPANTHETHEINYL TRANSFERASE                                             | I                                 |                                         |       |
| RSp0164 | RS05514 |  |      |      | -1,66 | 0,03 | 1,26  | 0,01  |       |      | TRANSMEMBRANE COG0534, Na <sup>+</sup> -driven multidrug efflux pump         | IV.G                              |                                         |       |
| RSp0165 | RS05513 |  |      |      |       |      |       |       |       |      | CONSERVED HYPOTHETICAL PROTEIN                                               | V.I.C                             |                                         |       |
| RSp0166 | RS05511 |  |      |      |       |      |       |       |       |      | cysC2 ADENYLYLSULFATE KINASE                                                 | I.F.3                             |                                         |       |
| RSp0167 | RS04679 |  |      |      |       |      |       |       |       |      | SULFOTRANSFERASE                                                             | I                                 |                                         |       |
| RSp0168 | RS04680 |  |      |      |       |      | -0,44 | 0,04  |       |      | HYPOTHETICAL PROTEIN                                                         | V.I.D                             |                                         |       |
| RSp0169 | RS04681 |  |      |      |       |      |       |       |       |      | TRANSMEMBRANE                                                                | V.I.D                             |                                         |       |
| RSp0170 | RS04682 |  |      |      |       |      | -1,53 | 0,03  |       |      | HYPOTHETICAL PROTEIN                                                         | V.I.D                             |                                         |       |
| RSp0171 | RS04683 |  |      |      |       |      |       |       | 0,59  | 0,00 | HYPOTHETICAL PROTEIN                                                         | V.I.B                             |                                         |       |
| RSp0172 | RS04684 |  |      |      |       |      | 0,50  | 0,00  | 0,63  | 0,01 | CONSERVED HYPOTHETICAL PROTEIN                                               | V.I.C                             |                                         |       |
| RSp0173 | RS04685 |  |      |      |       |      |       |       | 0,74  | 0,03 | CYSTEINE DESULFURASE (tRNA sulfurtransferase)                                | II.B.6                            |                                         |       |
| RSp0174 | RS04686 |  |      |      |       |      | 0,38  | 0,01  | 1,09  | 0,01 | COG0500, SAM-dependent methyltransferases                                    | I                                 |                                         |       |
| RSp0175 | RS04687 |  |      |      | 0,44  | 0,04 | -0,89 | 0,00  | -1,55 | 0,00 | VGR-RELATED PROTEIN                                                          | V.I.C                             |                                         |       |
| RSp0176 | RS04688 |  |      |      | 0,56  | 0,00 | -1,39 | 0,00  | -2,34 | 0,00 | CONSERVED HYPOTHETICAL PROTEIN                                               | V.I.C                             |                                         |       |
| RSp0177 | RS04689 |  |      |      | -1,17 | 0,00 | 1,94  | 0,00  | -0,55 | 0,03 | HYPOTHETICAL PROTEIN                                                         | V.I.B                             |                                         |       |
| RSp0178 | RS04690 |  |      |      | 0,62  | 0,02 | -0,92 | 0,00  | -1,16 | 0,02 | HYPOTHETICAL PROTEIN                                                         | V.I.D                             |                                         |       |
| RSp0179 | RS04691 |  |      |      |       |      | -0,72 | 0,00  | -0,93 | 0,04 | -0,92                                                                        | 0,01                              | CONJUGAL TRANSFERT TRBI-RELATED PROTEIN | V.I.B |
| RSp0180 | RS04692 |  |      |      |       |      |       |       |       |      | CONSERVED HYPOTHETICAL PROTEIN                                               | V.I.C                             |                                         |       |
| RSp0181 | RS04693 |  |      |      |       |      |       |       |       |      | CONSERVED HYPOTHETICAL PROTEIN                                               | V.I.C                             |                                         |       |
| RSp0182 | RS04694 |  |      |      |       |      |       |       |       |      | TRANSMEMBRANE TRANSPORTER                                                    | IV.D                              |                                         |       |
| RSp0183 | RS04695 |  |      |      |       |      |       |       |       |      | 3-CARBOXYMUONATE CYCLASE                                                     | I                                 |                                         |       |
| RSp0184 | RS04696 |  |      |      |       |      | -0,25 | 0,00  |       |      | HYPOTHETICAL PROTEIN                                                         | V.I.D                             |                                         |       |
| RSp0185 | RS04697 |  |      |      |       |      | -0,60 | 0,04  |       |      | TRANSCRIPTION REGULATOR                                                      | V.I.A                             |                                         |       |
| RSp0186 | RS04698 |  |      |      |       |      |       |       |       |      | ABC TRANSPORTER COG0834: ABC-type amino acid transport/signal transduction s | IV.D                              |                                         |       |
| RSp0187 | RS04699 |  |      |      |       |      |       |       |       |      | HYPOTHETICAL PROTEIN                                                         | V.I.D                             |                                         |       |
| RSp0188 | RS04700 |  |      |      |       |      |       |       | -0,42 | 0,02 | PSEUDOGENE, OXYDOREDUCTASE (FRAGMENT)                                        | V.I.B                             |                                         |       |
| RSp0189 | RS04701 |  |      |      |       |      |       |       |       |      | TRANSMEMBRANE TYPE IV PILUS ASSEMBLY FimV-RELATED PROTEIN                    | III.A.2                           |                                         |       |
| RSp0190 | RS04702 |  |      |      |       |      | -0,55 | 0,05  |       |      | TRANSMEMBRANE COG0730: Predicted permeases                                   | IV.D                              |                                         |       |
| RSp0191 | RS04703 |  |      |      |       |      | -0,54 | 0,01  |       |      | HYPOTHETICAL PROTEIN                                                         | V.I.D                             |                                         |       |
| RSp0192 | RS04705 |  |      |      |       |      |       |       |       |      | TRANSMEMBRANE                                                                | V.I.C                             |                                         |       |
| RSp0193 | RS04706 |  |      |      |       |      | 2,25  | 0,00  | 3,30  | 0,00 | PPR REPEATS CONTAINING PROTEIN                                               | V.I.B                             |                                         |       |
| RSp0194 | RS04707 |  |      |      |       |      | -0,53 | 0,02  |       |      | COG0332, 3-oxoacyl-[acyl-carrier-protein]                                    | I                                 |                                         |       |
| RSp0195 | RS04708 |  |      |      |       |      |       |       |       |      | HYPOTHETICAL PROTEIN                                                         | V.I.D                             |                                         |       |





|         |         |  |  |       |      |       |                                                                                |         |
|---------|---------|--|--|-------|------|-------|--------------------------------------------------------------------------------|---------|
| RSp0311 | RS05459 |  |  |       |      | oprM  | OUTER MEMBRANE CHANEL LIPOPROTEIN                                              | IV.D    |
| RSp0312 | RS05457 |  |  |       |      | mexD  | TRANSMEMBRANE MULTIDRUG EFFLUX SYSTEM PROTEIN                                  | IV.D    |
| RSp0313 | RS05456 |  |  |       |      | mexC  | MULTIDRUG EFFLUX SYSTEM PROTEIN                                                | IV.G.2  |
| RSp0314 | RS05454 |  |  | -0.64 | 0.01 |       | TRANSCRIPTION REGULATOR TWO COMPONENT RESPONSE REGULATOR                       | VIA     |
| RSp0315 | RS05453 |  |  | -0.66 | 0.02 |       | TRANSCRIPTION REGULATOR TRANSMEMBRANE SENSOR KINASE                            | VIA     |
| RSp0316 | RS05452 |  |  |       |      |       | OXIDOREDUCTASE COG2070, Dioxygenase related to 2-nitropropane dioxygenase      | I       |
| RSp0317 | RS05451 |  |  |       |      |       | CONSERVED HYPOTHETICAL PROTEIN                                                 | VIC     |
| RSp0318 | RS05449 |  |  | -0.47 | 0.00 |       | COG0589, Universal stress protein UspA and related nucleotide-binding proteins | VIC     |
| RSp0319 | RS05448 |  |  |       |      |       | TRANSMEMBRANE METAL-TRANSPORTING P-TYPE ATPASE                                 | IV.F.1  |
| RSp0320 | RS05447 |  |  |       |      |       | TRANSCRIPTION REGULATOR                                                        | VIA     |
| RSp0321 | RS05446 |  |  |       |      |       | CYSTEINE-RICH PROTEIN                                                          | VIC     |
| RSp0322 | RS05445 |  |  | 0.68  | 0.00 |       | 2-ISOPROPYLMALATE SYNTHASE                                                     | IA.1    |
| RSp0323 | RS05444 |  |  |       |      | leuA2 | CONSERVED HYPOTHETICAL PROTEIN                                                 | VIC     |
| RSp0324 | RS05442 |  |  | -2.47 | 0.00 |       | OXIDOREDUCTASE DEHYDROGENASE, SMALL CHAIN                                      | II      |
| RSp0325 | RS05441 |  |  |       |      |       | OXIDOREDUCTASE DEHYDROGENASE, LARGE CHAIN                                      | II      |
| RSp0326 | RS05440 |  |  |       |      |       | ORGANIC HYDROPEROXIDE RESISTANCE PROTEIN                                       | IV.G.4  |
| RSp0327 | RS05439 |  |  |       |      |       | CONSERVED HYPOTHETICAL PROTEIN                                                 | VIC     |
| RSp0328 | RS05438 |  |  |       |      |       | TRANSCRIPTION REGULATOR                                                        | VIA     |
| RSp0329 | RS05429 |  |  | 0.37  | 0.02 |       | OXIDOREDUCTASE 3-ISOPROPYLMALATE DEHYDROGENASE                                 | IA.1    |
| RSp0330 | RS00703 |  |  |       |      | leuB2 | ACONITATE HYDRATASE 1                                                          | I.H.6   |
| RSp0331 | RS00705 |  |  |       |      | acnA3 | TRANSCRIPTION REGULATOR                                                        | VIA     |
| RSp0332 | RS00707 |  |  |       |      | acnB  | TRANSMEMBRANE ACONITATE HYDRATASE 2                                            | I.H.6   |
| RSp0333 | RS00709 |  |  |       |      | osmB2 | TRANSMEMBRANE OSMOTICALLY INDUCIBLE LIPOPROTEIN B2                             | IV.F.2  |
| RSp0334 | RS00710 |  |  |       |      |       | SIGNAL TRANSDUCTION PROTEIN EAL - GGDEF DOMAINS                                | VIA     |
| RSp0335 | RS00711 |  |  |       |      |       | TRANSCRIPTION REGULATOR HNS-LIKE PROTEIN                                       | VIA     |
| RSp0336 | RS00713 |  |  | 0.59  | 0.01 |       | TRANSCRIPTION REGULATOR                                                        | VIA     |
| RSp0337 | RS00714 |  |  | 0.55  | 0.04 |       | TRANSMEMBRANE PORIN PRECURSOR                                                  | IV      |
| RSp0338 | RS00717 |  |  | 0.27  | 0.04 |       | TRANSCRIPTION REGULATOR NEGATIVE REGULATOR OF EXOPOLYSACCHAR                   | III.A.1 |
| RSp0339 | RS00719 |  |  |       |      | epsR  | FLAGELLA SYNTHESIS PROTEIN FLGN                                                | IV.C    |
| RSp0340 | RS00833 |  |  |       |      | figN  | NEGATIVE REGULATOR OF FLAGELLIN SYNTHESIS (ANTI-SIGMA-28 FACTOR)               | IV.C    |
| RSp0341 | RS00720 |  |  |       |      | figM  | FLAGELLA BASAL BODY P-RING FORMATION PROTEIN                                   | IV.C    |
| RSp0342 | RS00738 |  |  |       |      | figB  | FLAGELLAR BASAL-BODY ROD PROTEIN FLGB                                          | IV.C    |
| RSp0343 | RS00739 |  |  |       |      | figC  | FLAGELLAR BASAL-BODY ROD PROTEIN FLGC                                          | IV.C    |
| RSp0344 | RS00744 |  |  |       |      | figD  | BASAL-BODY ROD MODIFICATION PROTEIN FLGD                                       | IV.C    |
| RSp0345 | RS00745 |  |  |       |      | figE  | FLAGELLAR HOOK PROTEIN FLGE                                                    | IV.C    |
| RSp0346 | RS00747 |  |  |       |      | figF  | FLAGELLAR BASAL-BODY ROD PROTEIN FLGF                                          | IV.C    |
| RSp0347 | RS00748 |  |  |       |      | figG  | FLAGELLAR BASAL-BODY ROD PROTEIN FLGG (DISTAL ROD PROTEIN)                     | IV.C    |
| RSp0348 | RS00749 |  |  |       |      | figH  | FLAGELLAR L-RING PROTEIN PRECURSOR                                             | IV.C    |
| RSp0349 | RS00751 |  |  |       |      | figI  | SIGNAL PEPTIDE FLAGELLAR P-RING PROTEIN PRECURSOR                              | IV.C    |
| RSp0350 | RS00752 |  |  |       |      | figJ  | FLAGELLAR PROTEIN FLGJ                                                         | IV.C    |
| RSp0351 | RS00754 |  |  |       |      | figK  | FLAGELLAR HOOK-ASSOCIATED PROTEIN 1                                            | IV.C    |
| RSp0352 | RS00756 |  |  |       |      | figL  | FLAGELLAR HOOK-ASSOCIATED PROTEIN 3                                            | IV.C    |
| RSp0353 | RS00757 |  |  |       |      |       | TRANSMEMBRANE                                                                  | VIC     |
| RSp0354 | RS00759 |  |  |       |      |       | OXIDOREDUCTASE COG0644, Dehydrogenase (flavoproteins)                          | I       |
| RSp0355 | RS00761 |  |  | 0.63  | 0.00 |       | METHYLASE                                                                      | VIC     |
| RSp0356 | RS00762 |  |  |       |      |       | SIGNAL PEPTIDE                                                                 | VIC     |
| RSp0357 | RS00765 |  |  |       |      |       | 3-OXOACYL-[ACYL-CARRIER-PROTEIN] SYNTHASE I                                    | I.B.1   |
| RSp0358 | RS00767 |  |  |       |      | fabB  | 3-OXOACYL-[ACYL-CARRIER-PROTEIN] SYNTHASE II                                   | I.B.1   |
| RSp0359 | RS00769 |  |  |       |      | fabF2 | OXIDOREDUCTASE 3-OXOACYL-[ACYL-CARRIER-PROTEIN] REDUCTASE                      | I.B.1   |
| RSp0360 | RS00772 |  |  |       |      | fabG2 | OXIDOREDUCTASE COG4706, 3-hydroxyacyl-(acyl carrier protein) dehydratase       | I       |
| RSp0361 | RS00773 |  |  |       |      |       | 3-OXOACYL-[ACYL-CARRIER-PROTEIN] SYNTHASE                                      | I.B.1   |
| RSp0362 | RS00775 |  |  |       |      |       | TRANSMEMBRANE COG4258, Predicted exporter                                      | IV.D    |
| RSp0363 | RS00776 |  |  |       |      |       | SIGNAL PEPTIDE                                                                 | VIC     |
| RSp0364 | RS00778 |  |  |       |      |       | COG0824, Thioesterase                                                          | I       |
| RSp0365 | RS00779 |  |  |       |      | hutH2 | HISTIDINE AMMONIA-LYASE                                                        | I.I.3   |
| RSp0366 | RS00785 |  |  |       |      |       | TRANSMEMBRANE COG0463, Glycosyltransferase AND COG4261, Predicted acyltr       | I       |
| RSp0367 | RS00787 |  |  |       |      |       | COG0365, Acyl-coenzyme A synthetases/AMP-(fatty) acid ligases AND COG0764, 3-  | I       |
| RSp0368 | RS00790 |  |  |       |      |       | TRANSMEMBRANE                                                                  | VIC     |
| RSp0369 | RS00792 |  |  |       |      |       | ACYL-CARRIER PROTEIN                                                           | I       |
| RSp0370 | RS00794 |  |  |       |      |       | ACYL-CARRIER PROTEIN                                                           | I       |
| RSp0371 | RS00796 |  |  |       |      |       | TRANSMEMBRANE 1-ACYL-SN-GLYCEROL-3-PHOSPHATE ACYLTRANSFERASE                   | II.B.1  |
| RSp0372 | RS00799 |  |  |       |      |       | CONSERVED HYPOTHETICAL PROTEIN                                                 | VIC     |
| RSp0373 | RS00800 |  |  |       |      | fljR  | TRANSMEMBRANE FLAGELLAR BIOSYNTHETIC PROTEIN FLJR                              | IV.C    |
| RSp0374 | RS00802 |  |  |       |      | fljQ  | TRANSMEMBRANE FLAGELLAR BIOSYNTHETIC PROTEIN FLJQ                              | IV.C    |
| RSp0375 | RS00803 |  |  |       |      | fljP  | TRANSMEMBRANE FLAGELLAR BIOSYNTHETIC PROTEIN FLJP                              | IV.C    |
| RSp0376 | RS00804 |  |  |       |      | fljO  | TRANSMEMBRANE FLAGELLAR PROTEIN FLJO                                           | IV.C    |
| RSp0377 | RS00805 |  |  |       |      | fljN  | FLAGELLAR MOTOR SWITCH PROTEIN FLJN                                            | IV.C    |
| RSp0378 | RS00806 |  |  |       |      | fljM  | FLAGELLAR MOTOR SWITCH PROTEIN FLJM                                            | IV.C    |
| RSp0379 | RS00807 |  |  |       |      | fljL  | TRANSMEMBRANE FLAGELLAR FLJL PROTEIN                                           | IV.C    |
| RSp0380 | RS00808 |  |  |       |      |       | SIGNAL TRANSDUCTION PROTEIN EAL - GGDEF DOMAINS                                | VIA     |
| RSp0381 | RS00809 |  |  |       |      |       | TRANSCRIPTION REGULATOR                                                        | VIA     |
| RSp0382 | RS00810 |  |  |       |      |       | FLAGELLIN                                                                      | IV.C    |
| RSp0383 | RS00811 |  |  |       |      | fljC  | FLAGELLAR HOOK-ASSOCIATED PROTEIN 2 (FILAMENT CAP PROTEIN)                     | IV.C    |
| RSp0384 | RS00812 |  |  |       |      | fljD  | FLAGELLAR PROTEIN FLJD                                                         | IV.C    |
| RSp0385 | RS00813 |  |  |       |      | fljS  | FLAGELLAR PROTEIN FLJS                                                         | IV.C    |
| RSp0386 | RS00814 |  |  |       |      | fljT  | TRANSCRIPTION REGULATOR                                                        | VIA     |
| RSp0387 | RS00815 |  |  |       |      |       | CONSERVED HYPOTHETICAL PROTEIN                                                 | VIC     |
| RSp0388 | RS00816 |  |  |       |      |       | TRANSMEMBRANE COG3774, Mannosyltransferase OCH1 and related enzymes            | II.B    |
| RSp0389 | RS00817 |  |  |       |      | fljE  | FLAGELLAR HOOK-BASAL BODY COMPLEX PROTEIN FLJE                                 | IV.C    |
| RSp0390 | RS00818 |  |  |       |      | fljF  | TRANSMEMBRANE FLAGELLAR M-RING PROTEIN                                         | IV.C    |
| RSp0391 | RS00819 |  |  |       |      | fljG  | FLAGELLAR MOTOR SWITCH PROTEIN FLJG                                            | IV.C    |
| RSp0392 | RS00820 |  |  |       |      | fljH  | FLAGELLAR ASSEMBLY PROTEIN FLJH                                                | IV.C    |
| RSp0393 | RS00821 |  |  |       |      | fljI  | FLAGELLUM-SPECIFIC ATP SYNTHASE                                                | IV.C    |
| RSp0394 | RS00822 |  |  |       |      | fljJ  | FLAGELLAR PROTEIN                                                              | IV.C    |
| RSp0395 | RS00823 |  |  |       |      | fljK  | FLAGELLAR HOOK-LENGTH CONTROL PROTEIN                                          | IV.C    |
| RSp0396 | RS00824 |  |  |       |      |       | TRANSMEMBRANE                                                                  | VIC     |
| RSp0397 | RS00825 |  |  |       |      | pat   | PHOSPHOTHIOIC ACETYLTRANSFERASE                                                | IV.G.4  |
| RSp0398 | RS00826 |  |  |       |      |       | TRANSMEMBRANE SIGNAL TRANSDUCTION PROTEIN GGDEF DOMAIN                         | VIA     |
| RSp0399 | RS00827 |  |  |       |      |       | HYPOTHETICAL PROTEIN                                                           | VLD     |
| RSp0400 | RS00828 |  |  |       |      |       | TRANSMEMBRANE SIGNAL TRANSDUCTION PROTEIN GGDEF DOMAIN                         | VIA     |
| RSp0401 | RS00829 |  |  |       |      |       | LIPOPROTEIN                                                                    | VLD     |
| RSp0402 | RS00830 |  |  |       |      |       | TRANSMEMBRANE                                                                  | VIC     |
| RSp0403 | RS00831 |  |  |       |      |       | SIGNAL PEPTIDE                                                                 | VIC     |
| RSp0404 | RS00861 |  |  |       |      |       | TRANSMEMBRANE                                                                  | VLB     |
| RSp0405 | RS00862 |  |  |       |      |       | HYPOTHETICAL PROTEIN                                                           | VLD     |
| RSp0406 | RS00863 |  |  |       |      |       | HYPOTHETICAL PROTEIN                                                           | VLD     |
| RSp0407 | RS00864 |  |  |       |      |       | TRANSMEMBRANE                                                                  | VLD     |
| RSp0408 | RS00865 |  |  |       |      |       | HYPOTHETICAL PROTEIN                                                           | VLD     |
| RSp0409 | RS00866 |  |  |       |      |       | TRANSMEMBRANE                                                                  | VLD     |
| RSp0410 | RS00867 |  |  |       |      |       | TRANSMEMBRANE                                                                  | VIC     |
| RSp0411 | RS00868 |  |  |       |      |       | TRANSMEMBRANE COG0628, Permease                                                | IV.D    |
| RSp0412 | RS00869 |  |  |       |      |       | TRANSMEMBRANE COG0477, Permeases of the major facilitator superfamily          | IV.D    |
| RSp0413 | RS00870 |  |  |       |      |       | CONSERVED HYPOTHETICAL PROTEIN                                                 | VIC     |
| RSp0414 | RS00871 |  |  |       |      |       | FERRIC SIDEROPHORE RECEPTOR                                                    | IV.D.5  |
| RSp0415 | RS00872 |  |  |       |      |       | TRANSCRIPTION REGULATOR EXTRACYTOPLASMIC FUNCTION SIGMA FACTO                  | I.E.1   |
| RSp0416 | RS00873 |  |  |       |      |       | SIGNAL PEPTIDE FERRIC SIDEROPHORE RECEPTOR OUTER MEMBRANE PRO                  | IV.D.5  |
| RSp0417 | RS00874 |  |  |       |      |       | CYSTEINE SYNTHASE                                                              | IV.D.5  |
| RSp0418 | RS00875 |  |  |       |      |       | ORNITHINE CYCLODEAMINASE                                                       | IV.D.5  |
| RSp0419 | RS00876 |  |  |       |      |       | Siderophore synthetase component                                               | IV.D.5  |
| RSp0420 | RS00877 |  |  |       |      |       | TRANSMEMBRANE EFFLUX PROTEIN                                                   | IV.D.5  |
| RSp0421 | RS00878 |  |  |       |      |       | Siderophore synthetase component                                               | IV.D.5  |
| RSp0422 | RS00879 |  |  |       |      |       | Siderophore synthetase component                                               | IV.D.5  |



|         |         |  |       |       |       |       |       |       |       |                                                                           |                                                          |                                |                                                                           |        |
|---------|---------|--|-------|-------|-------|-------|-------|-------|-------|---------------------------------------------------------------------------|----------------------------------------------------------|--------------------------------|---------------------------------------------------------------------------|--------|
| RSp0542 | RS05800 |  |       | 0.61  | 0.01  |       |       |       |       | CONSERVED HYPOTHETICAL PROTEIN                                            | VI.C                                                     |                                |                                                                           |        |
| RSp0543 | RS05799 |  |       | -0.52 | 0.00  |       | -1.09 | 0.02  |       | HYPOTHETICAL PROTEIN                                                      | VI.D                                                     |                                |                                                                           |        |
| RSp0544 | RS03936 |  |       |       |       |       |       |       |       | HYPOTHETICAL PROTEIN                                                      | VI.B                                                     |                                |                                                                           |        |
| RSp0546 | RS03935 |  |       | -0.36 | 0.00  |       |       | -2.17 | 0.00  | HYPOTHETICAL PROTEIN                                                      | VI.C                                                     |                                |                                                                           |        |
| RSp0547 | RS03933 |  |       | -0.34 | 0.05  |       |       |       |       | ISRs08: ISRS08-TRANSPOSASE ORFA                                           | VI.D                                                     |                                |                                                                           |        |
| RSp0549 | RS03931 |  |       | -0.75 | 0.04  |       |       |       |       | TRANSMEMBRANE                                                             | VI.D                                                     |                                |                                                                           |        |
| RSp0550 | RS03929 |  |       | -0.71 | 0.01  |       |       |       |       | SIGNAL PEPTIDE ACTIVATION/SECRETION PROTEIN                               | IV.E.2                                                   |                                |                                                                           |        |
| RSp0551 | RS03928 |  |       |       |       |       |       |       |       | TRANSMEMBRANE COG0402, Cytosine deaminase and related metal-dependent hyl |                                                          |                                |                                                                           |        |
| RSp0552 | RS03927 |  | 0.43  | 0.04  |       | -0.61 | 0.00  |       |       | TRANSMEMBRANE                                                             | VI.C                                                     |                                |                                                                           |        |
| RSp0553 | RS03926 |  |       |       |       |       |       |       |       | CONSERVED HYPOTHETICAL PROTEIN                                            | VI.C                                                     |                                |                                                                           |        |
| RSp0554 | RS03925 |  |       |       |       | -1.83 | 0.00  |       | -1.70 | 0.00                                                                      | SIGNAL PEPTIDE CHROMATE RESISTANCE PROTEIN               | IV.D.1                         |                                                                           |        |
| RSp0555 | RS03924 |  |       |       |       | -0.65 | 0.01  |       |       | TRANSMEMBRANE CHROMATE TRANSPORT PROTEIN                                  | IV.D.1                                                   |                                |                                                                           |        |
| RSp0556 | RS03923 |  |       |       |       | -0.48 | 0.00  |       |       | CONSERVED HYPOTHETICAL PROTEIN                                            | VI.C                                                     |                                |                                                                           |        |
| RSp0557 | RS03922 |  | 0.43  | 0.02  |       |       |       |       | -0.47 | 0.01                                                                      | ISRs01f: ISRS016-TRANSPOSASE ORFA                        | VA                             |                                                                           |        |
| RSp0559 | RS03920 |  | -0.41 | 0.02  |       |       |       |       |       | TRANSMEMBRANE                                                             | VA                                                       |                                |                                                                           |        |
| RSp0560 | RS03918 |  |       |       |       | -0.29 | 0.05  |       | -1.03 | 0.03                                                                      | HYPOTHETICAL PROTEIN                                     | VI.D                           |                                                                           |        |
| RSp0561 | RS03917 |  |       |       |       | -1.13 | 0.02  |       |       |                                                                           | PSEUDOGENE (TRANSCRIPTION REGULATOR C-terminal fragment) | VI.C                           |                                                                           |        |
| RSp0562 | RS03916 |  |       |       |       |       |       |       |       | PSEUDOGENE (TRANSCRIPTION REGULATOR N-terminal fragment)                  | VI.C                                                     |                                |                                                                           |        |
| RSp0563 | RS03915 |  |       |       |       |       |       |       |       | COG0526, Thiol-disulfide isomerase and thioredoxins                       | II.B.7                                                   |                                |                                                                           |        |
| RSp0564 | RS03914 |  |       |       |       |       |       |       |       | LIPOPROTEIN                                                               | VI.C                                                     |                                |                                                                           |        |
| RSp0565 | RS03913 |  |       |       |       | -0.45 | 0.02  |       |       | SIGNAL PEPTIDE                                                            | VI.C                                                     |                                |                                                                           |        |
| RSp0567 | RS03911 |  |       |       |       |       |       |       |       | ISRs0t: ISRS010-TRANSPOSASE ORFB                                          | VA                                                       |                                |                                                                           |        |
| RSp0568 | RS03910 |  |       |       |       |       |       | 0.78  | 0.01  | CONSERVED HYPOTHETICAL PROTEIN                                            | VI.C                                                     |                                |                                                                           |        |
| RSp0569 | RS03909 |  |       |       |       |       |       |       | 1.54  | 0.00                                                                      | HYPOTHETICAL PROTEIN                                     | VI.D                           |                                                                           |        |
| RSp0570 | RS06032 |  |       |       |       |       |       |       |       | COG1475, Predicted transcriptional regulators                             | VI.A                                                     |                                |                                                                           |        |
| RSp0571 | RS06031 |  |       |       |       | -0.68 | 0.04  |       |       | CONSERVED HYPOTHETICAL PROTEIN                                            | VI.C                                                     |                                |                                                                           |        |
| RSp0572 | RS03907 |  | -1.73 | 0.00  | -4.10 | 0.00  | 0.72  | 0.05  | 2.68  | 0.00                                                                      | CONSERVED HYPOTHETICAL PROTEIN                           | VI.C                           |                                                                           |        |
| RSp0573 | RS03906 |  |       |       |       |       |       |       | -0.95 | 0.03                                                                      | HYPOTHETICAL PROTEIN                                     | VI.B                           |                                                                           |        |
| RSp0574 | RS03905 |  |       |       |       |       |       |       |       |                                                                           | CONSERVED HYPOTHETICAL PROTEIN                           | VI.C                           |                                                                           |        |
| RSp0575 | RS03904 |  |       |       |       | 1.22  | 0.00  |       |       |                                                                           | CONSERVED HYPOTHETICAL PROTEIN                           | VI.C                           |                                                                           |        |
| RSp0576 | RS03903 |  |       |       |       | -0.90 | 0.00  |       |       |                                                                           | CONSERVED HYPOTHETICAL PROTEIN                           | VI.C                           |                                                                           |        |
| RSp0577 | RS03902 |  |       |       |       | -0.68 | 0.01  |       |       | 1.66                                                                      | 0.00                                                     | CONSERVED HYPOTHETICAL PROTEIN | VI.C                                                                      |        |
| RSp0578 | RS03901 |  |       |       |       |       |       |       |       |                                                                           | HYPOTHETICAL PROTEIN                                     | VI.D                           |                                                                           |        |
| RSp0579 | RS03900 |  |       |       |       | 0.84  | 0.05  |       |       |                                                                           | BACTERIOPHAGE-RELATED PROTEIN                            | VI.D                           |                                                                           |        |
| RSp0580 | RS03899 |  |       |       |       |       |       |       |       |                                                                           | PRODUCT OF A TRUNCATED BACTERIOPHAGE GENE                | VI.D                           |                                                                           |        |
| RSp0583 | RS03897 |  |       | 0.61  | 0.00  |       |       |       | 0.77  | 0.04                                                                      | EXOGLUCANASE A (1,4-BETA-CELLOBIOSIDASE)                 | II.A.3                         |                                                                           |        |
| RSp0585 | RS03895 |  |       |       |       |       |       |       |       |                                                                           | REMNANT OF IS1421-TRANSPOSASE ORFA                       | VA                             |                                                                           |        |
| RSp0586 | RS03894 |  |       |       |       | -0.89 | 0.02  |       |       |                                                                           | HYPOTHETICAL PROTEIN                                     | VI.D                           |                                                                           |        |
| RSp0587 | RS03893 |  |       |       |       | -2.52 | 0.04  |       | 3.95  | 0.00                                                                      | SIGNAL PEPTIDE                                           | VI.B                           |                                                                           |        |
| RSp0588 | RS03892 |  |       |       |       |       |       |       |       |                                                                           | TRANSPOSASE FRAGMENT                                     | VA                             |                                                                           |        |
| RSp0589 | RS03890 |  |       |       |       | -0.30 | 0.05  |       |       |                                                                           | OXIDOREDUCTASE DEHYDROGENASE/REDUCTASE                   | II                             |                                                                           |        |
| RSp0590 | RS03889 |  |       |       |       |       |       |       |       |                                                                           | TRANSCRIPTION REGULATOR                                  | VI.A                           |                                                                           |        |
| RSp0591 | RS03891 |  |       |       |       | -0.41 | 0.05  |       | -1.13 | 0.04                                                                      | HYPOTHETICAL PROTEIN                                     | VI.D                           |                                                                           |        |
| RSp0592 | RS03888 |  |       |       |       |       |       |       |       |                                                                           | HYPOTHETICAL PROTEIN                                     | VI.D                           |                                                                           |        |
| RSp0593 | RS03887 |  |       |       |       | -1.26 | 0.00  |       | 1.16  | 0.00                                                                      | HYPOTHETICAL PROTEIN                                     | VI.D                           |                                                                           |        |
| RSp0594 | RS03886 |  |       |       |       |       |       |       |       |                                                                           | HYPOTHETICAL PROTEIN                                     | VI.D                           |                                                                           |        |
| RSp0595 | RS03884 |  |       |       |       | -0.67 | 0.00  |       | -0.47 | 0.02                                                                      | CONSERVED HYPOTHETICAL PROTEIN                           | VI.C                           |                                                                           |        |
| RSp0596 | RS03883 |  |       |       |       |       |       |       | 1.91  | 0.00                                                                      | TRANSMEMBRANE                                            | VI.B                           |                                                                           |        |
| RSp0597 | RS03882 |  |       |       |       |       |       |       |       |                                                                           | CONSERVED HYPOTHETICAL PROTEIN                           | VI.C                           |                                                                           |        |
| RSp0598 | RS03881 |  |       |       |       |       |       |       | -0.93 | 0.02                                                                      | TRANSCRIPTION REGULATOR RESPONSE REGULATOR               | VI.A                           |                                                                           |        |
| RSp0599 | RS03880 |  |       |       |       | -1.67 | 0.01  |       |       |                                                                           | TRANSCRIPTION REGULATOR                                  | VI.A                           |                                                                           |        |
| RSp0600 | RS03879 |  |       |       |       |       |       |       |       |                                                                           | COG4319, Ketosteroid isomerase homolog                   | VI.C                           |                                                                           |        |
| RSp0601 | RS03878 |  |       |       |       |       |       |       |       |                                                                           | CONSERVED HYPOTHETICAL PROTEIN                           | VI.C                           |                                                                           |        |
| RSp0602 | RS03877 |  | -0.65 | 0.02  |       | -0.73 | 0.01  |       | 0.50  | 0.02                                                                      | phnB: SIGNAL PEPTIDE                                     | VI.D                           |                                                                           |        |
| RSp0603 | RS03876 |  | -2.65 | 0.00  | 0.53  | 0.02  | -1.60 | 0.00  | 2.34  | 0.00                                                                      | 3.13                                                     | 0.00                           | SERINE PROTEASE                                                           | II.A.4 |
| RSp0604 | RS03875 |  |       |       |       |       |       |       | -1.55 | 0.03                                                                      |                                                          |                                | PHENYLACETIC ACID DEGRADATION PROTEIN                                     | II.A   |
| RSp0605 | RS03874 |  |       |       |       | -0.43 | 0.04  |       |       |                                                                           |                                                          |                                | PHENYLACETIC ACID DEGRADATION PROTEIN                                     | II.A   |
| RSp0606 | RS03873 |  |       |       |       |       |       |       |       |                                                                           |                                                          |                                | PHENYLACETIC ACID DEGRADATION PROTEIN                                     | II.A   |
| RSp0607 | RS03872 |  |       |       |       | -0.44 | 0.03  |       |       |                                                                           |                                                          |                                | PHENYLACETIC ACID DEGRADATION PROTEIN                                     | II.A   |
| RSp0608 | RS03871 |  |       |       |       | -0.58 | 0.03  |       |       |                                                                           |                                                          |                                | FERREDOXIN REDUCTASE                                                      | I.G.1  |
| RSp0609 | RS03758 |  |       |       |       | -1.38 | 0.02  |       |       |                                                                           |                                                          |                                | HYPOTHETICAL PROTEIN                                                      | VI.D   |
| RSp0610 | RS03757 |  |       |       |       |       |       |       |       |                                                                           |                                                          |                                | CONSERVED HYPOTHETICAL PROTEIN                                            | VI.C   |
| RSp0611 | RS03756 |  |       |       |       |       |       |       | -0.65 | 0.00                                                                      |                                                          |                                | TRANSMEMBRANE                                                             | VI.C   |
| RSp0612 | RS03755 |  |       |       |       |       |       |       |       |                                                                           |                                                          |                                | TRANSMEMBRANE                                                             | VI.C   |
| RSp0613 | RS03754 |  |       |       |       |       |       |       |       |                                                                           |                                                          |                                | TRANSCRIPTION REGULATOR                                                   | VI.A   |
| RSp0614 | RS03753 |  |       |       |       |       |       |       |       |                                                                           |                                                          |                                | OXIDOREDUCTASE COG0778, Nitroreductase                                    | I      |
| RSp0615 | RS03752 |  |       |       |       | 0.54  | 0.03  |       |       |                                                                           |                                                          |                                | COBYRINIC ACID A,C-DIAMIDE SYNTHASE                                       | II.B.3 |
| RSp0616 | RS03751 |  |       |       |       | 0.71  | 0.02  |       |       |                                                                           |                                                          |                                | COB(II)ALAMIN ADENOSYLTRANSFERASE                                         | II.B.3 |
| RSp0617 | RS03750 |  |       |       |       | 1.60  | 0.03  |       |       |                                                                           |                                                          |                                | COBALAMIN BIOSYNTHESIS PROTEIN                                            | II.B.3 |
| RSp0618 | RS03749 |  |       |       |       | 0.94  | 0.01  |       |       |                                                                           |                                                          |                                | OXIDOREDUCTASE BIFUNCTIONAL PROTEIN: PRECORRIN-3 METHYLTRANSFERASE        | II.B.3 |
| RSp0619 | RS03748 |  |       |       |       |       |       |       |       |                                                                           |                                                          |                                | PRECORRIN METHYLASE                                                       | II.B.3 |
| RSp0620 | RS03747 |  |       |       |       |       |       |       | 0.81  | 0.04                                                                      |                                                          |                                | PRECORRIN-4 C11-METHYLTRANSFERASE                                         | II.B.3 |
| RSp0621 | RS03746 |  |       |       |       |       |       |       |       |                                                                           |                                                          |                                | PRECORRIN-2 C20-METHYLTRANSFERASE                                         | II.B.3 |
| RSp0622 | RS03745 |  |       |       |       |       |       |       | 1.02  | 0.05                                                                      |                                                          |                                | TRANSMEMBRANE COBALAMIN BIOSYNTHESIS PROTEIN D                            | II.B.3 |
| RSp0623 | RS03744 |  |       |       |       | 0.73  | 0.00  |       |       |                                                                           |                                                          |                                | TRANSMEMBRANE PRECORRIN ISOMERASE                                         | II.B.3 |
| RSp0624 | RS03743 |  |       |       |       | 0.65  | 0.00  |       | 2.29  | 0.00                                                                      |                                                          |                                | PRECORRIN-6B METHYLASE METHYLTRANSFERASE                                  | II.B.3 |
| RSp0625 | RS03742 |  |       |       |       | 0.70  | 0.00  |       | -1.09 | 0.00                                                                      |                                                          |                                | MAGNESIUM CHELATASE (SUBUNITS D/I)                                        | I      |
| RSp0626 | RS03741 |  |       |       |       | 0.50  | 0.03  |       |       |                                                                           |                                                          |                                | COBALAMIN BIOSYNTHESIS PROTEIN                                            | II.B.3 |
| RSp0627 | RS03740 |  |       |       |       | 0.89  | 0.00  |       | -0.45 | 0.00                                                                      |                                                          |                                | FERREDOXIN                                                                | I.G.1  |
| RSp0628 | RS03739 |  |       |       |       | 0.91  | 0.00  |       | -0.42 | 0.01                                                                      |                                                          |                                | TRANSMEMBRANE HIGH AFFINITY NICKEL TRANSPORTER                            | IV.D.1 |
| RSp0629 | RS03738 |  | 0.84  | 0.03  | 0.60  | 0.03  | -0.83 | 0.00  |       | -1.99                                                                     | 0.00                                                     |                                | VGR-RELATED PROTEIN                                                       | VI.C   |
| RSp0630 | RS03737 |  |       |       |       | 0.63  | 0.00  |       |       |                                                                           |                                                          |                                | PHOSPHOLIPASE                                                             | VI.C   |
| RSp0631 | RS03736 |  |       |       |       | 0.66  | 0.00  |       | -0.91 | 0.00                                                                      |                                                          |                                | LIPOPROTEIN WITH COG0790, FOG: TPR repeat, SEL1 subfamily                 | VI.C   |
| RSp0632 | RS03735 |  |       |       |       | 0.76  | 0.04  |       | -0.78 | 0.00                                                                      |                                                          |                                | CONSERVED HYPOTHETICAL PROTEIN                                            | VI.C   |
| RSp0633 | RS03734 |  | 1.52  | 0.03  | 0.85  | 0.00  | -0.86 | 0.00  |       | -1.26                                                                     | 0.05                                                     |                                | HYPOTHETICAL PROTEIN                                                      | VI.D   |
| RSp0634 | RS03733 |  |       |       |       | -0.39 | 0.02  |       |       |                                                                           |                                                          |                                | LIPOPOLYSACCHARIDE HEPTOSYLTRANSFERASE                                    | II.B.2 |
| RSp0635 | RS03732 |  |       |       |       |       |       |       |       |                                                                           |                                                          |                                | TRANSMEMBRANE ACYLTRANSFERASE                                             | VI.C   |
| RSp0636 | RS03731 |  |       |       |       | 1.36  | 0.01  |       | -0.36 | 0.05                                                                      |                                                          |                                | TRANSCRIPTION REGULATOR COG4941, Predicted RNA polymerase sigma factor    | VI.A   |
| RSp0637 | RS03730 |  |       |       |       |       |       |       | -1.69 | 0.01                                                                      |                                                          |                                | CONSERVED HYPOTHETICAL PROTEIN                                            | VI.C   |
| RSp0638 | RS03729 |  |       |       |       |       |       |       |       |                                                                           |                                                          |                                | ABC TRANSPORTER COG4615, ABC-type siderophore export system, fused ATPase | IV.F   |
| RSp0639 | RS03728 |  |       |       |       | 0.63  | 0.01  |       | -0.27 | 0.03                                                                      |                                                          |                                | COG2220, Predicted Zn-dependent hydrolases of the beta-lactamase fold     | I      |
| RSp0640 | RS03727 |  |       |       |       | 0.47  | 0.02  |       | -0.31 | 0.04                                                                      |                                                          |                                | CONSERVED HYPOTHETICAL PROTEIN                                            | VI.C   |
| RSp0641 | RS05860 |  |       |       |       | 0.75  | 0.01  |       |       |                                                                           |                                                          |                                | PEPTIDE SYNTHETASE                                                        | IV.G   |
| RSp0642 | RS05859 |  |       |       |       | 0.39  | 0.02  |       |       |                                                                           |                                                          |                                | PEPTIDE SYNTHETASE                                                        | IV.G.3 |
| RSp0643 | RS05579 |  |       |       |       | -0.77 | 0.00  |       | 1.12  | 0.00                                                                      |                                                          |                                | HYPOTHETICAL PROTEIN                                                      | VI.D   |
| RSp0644 | RS05578 |  |       |       |       |       |       |       |       |                                                                           |                                                          |                                | SIGNAL PEPTIDE                                                            | VI.D   |
| RSp0645 | RS05577 |  |       |       |       |       |       |       |       |                                                                           |                                                          |                                | TRANSCRIPTION REGULATOR                                                   | VI.A   |
| RSp0646 | RS05576 |  |       |       |       | 0.68  | 0.01  |       |       |                                                                           |                                                          |                                | 1-AMINOCYCLOPROPANE-1-CARBOXYLATE DEAMINASE (ACC DEAMINASE)               | I      |
| RSp0647 | RS05575 |  |       |       |       |       |       |       |       |                                                                           |                                                          |                                | ENOYL-COENZYME A HYDRATASE                                                | I      |
| RSp0648 | RS05574 |  |       |       |       |       |       |       |       |                                                                           |                                                          |                                | ENOYL-COA HYDRATASE                                                       | I      |
| RSp0649 | RS05573 |  |       |       |       |       |       |       |       |                                                                           |                                                          |                                | OXIDOREDUCTASE 3-HYDROXYISOBUTYRATE DEHYDROGENASE                         | II.A.2 |
| RSp0650 | RS05572 |  |       |       |       |       |       |       |       |                                                                           |                                                          |                                | OXIDOREDUCTASE METHYLMALONATE-SEMIALDEHYDE DEHYDROGENASE                  | II.A.2 |
| RSp0651 | RS05571 |  |       |       |       |       |       |       |       |                                                                           |                                                          |                                | ACETYL-COENZYME A SYNTHETASE (ACETATE--COA LIGASE)                        | I.C    |
| RSp0652 | RS05570 |  |       |       |       |       |       |       |       |                                                                           |                                                          |                                | OXIDOREDUCTASE ACYL-COA DEHYDROGENASE                                     | I      |
| RSp0653 | RS05569 |  |       |       |       |       |       |       |       |                                                                           |                                                          |                                | TRANSCRIPTION REGULATOR                                                   | VI.A   |
| RSp0654 | RS05568 |  |       |       |       |       |       |       | -1.16 | 0.00                                                                      |                                                          |                                | TRANSCRIPTION REGULATOR TWO COMPONENT SENSOR HISTIDINE KINASE             | IV.G   |
| RSp0655 | RS05567 |  |       |       |       |       |       |       |       |                                                                           |                                                          |                                | TRANSCRIPTION REGULATOR TWO COMPONENT RESPONSE REGULATOR                  | IV.G   |
| RSp0656 | RS05566 |  |       |       |       | -0.58 | 0.03  |       |       |                                                                           |                                                          |                                | TRANSMEMBRANE COPPER RESISTANCE PROTEIN                                   | IV.G   |
| RSp0657 | RS01792 |  |       |       |       | 0.98  | 0.00  |       |       |                                                                           |                                                          |                                | COPPER RESISTANCE PROTEIN B                                               | IV.G.4 |
| RSp0658 | RS01791 |  |       |       |       | -0.38 | 0.03  |       |       |                                                                           |                                                          |                                | SIGNAL PEPTIDE COPPER RESISTANCE PROTEIN C                                | IV.G.4 |
| RSp0659 | RS01790 |  |       |       |       | 0.40  | 0.02  |       |       |                                                                           |                                                          |                                | TRANSMEMBRANE COPPER RESISTANCE PROTEIN D                                 | IV.G.4 |
| RSp0660 | RS01789 |  |       |       |       | -0.24 | 0.01  |       |       |                                                                           |                                                          |                                | PORIN                                                                     | IV.D   |



|         |         |       |      |       |      |       |      |       |                                                                                  |         |
|---------|---------|-------|------|-------|------|-------|------|-------|----------------------------------------------------------------------------------|---------|
| RSp0661 | RS01788 |       |      | -0.46 | 0.01 |       |      |       | COG1335 Amidase related to nicotinamidase                                        | I       |
| RSp0662 | RS01787 |       |      |       |      |       |      |       | TRANSCRIPTION REGULATOR                                                          | V.I.A   |
| RSp0663 | RS01786 |       |      |       |      | -0.78 | 0.03 |       | TRANSMEMBRANE TRANSPORT PROTEIN                                                  | IV.D    |
| RSp0664 | RS01785 |       |      | -0.44 | 0.01 |       |      | 0.63  | TRANSCRIPTION REGULATOR                                                          | V.I.A   |
| RSp0665 | RS01784 |       |      | -0.30 | 0.00 |       |      |       | TRANSMEMBRANE MAGNESIUM AND COBALT TRANSPORT PROTEIN                             | IV.D.7  |
| RSp0666 | RS01783 |       |      |       |      |       |      |       | DNA-3-METHYLADENINE GLYCOSYLASE I                                                | II.B.8  |
| RSp0667 | RS01782 |       |      | -0.39 | 0.02 |       |      | -1.21 | TRANSMEMBRANE CYNX-RELATED TRANSPORT PROTEIN                                     | IV      |
| RSp0668 | RS01781 |       |      |       |      |       |      |       | CONSERVED HYPOTHETICAL PROTEIN                                                   | V.I.C   |
| RSp0669 | RS01780 |       |      |       |      |       |      |       | OUTER MEMBRANE CHANNEL LIPOPROTEIN                                               | IV.D    |
| RSp0670 | RS01779 |       |      |       |      | 0.21  | 0.05 |       | TRANSMEMBRANE TRANSPORTER LIPOPROTEIN                                            | IV.D.7  |
| RSp0671 | RS01778 |       |      |       |      | -0.73 | 0.00 |       | ENOYL COA-HYDRATASE                                                              | I.I.4   |
| RSp0672 | RS01777 |       |      | -3.50 | 0.00 | -1.12 | 0.00 | 3.55  | LRR-GALA FAMILY TYPE III EFFECTOR PROTEIN (GALA 2)                               | V.I.C   |
| RSp0673 | RS01776 |       |      |       |      |       |      | -0.44 | LIPOPROTEIN                                                                      | V.I.C   |
| RSp0674 | RS01775 | 1.47  | 0.02 |       |      | -0.77 | 0.00 | -1.69 | LIPOPROTEIN                                                                      | V.I.C   |
| RSp0675 | RS01774 |       |      |       |      | -0.62 | 0.01 | -1.59 | LIPOPROTEIN                                                                      | V.I.C   |
| RSp0676 | RS01773 | -2.02 | 0.00 |       |      | -0.76 | 0.00 | 3.92  | LIPOPROTEIN                                                                      | V.I.C   |
| RSp0677 | RS01772 |       |      |       |      |       |      | 1.74  | 5-METHYL-TETRAHYDROPTEROYL-TRIGLUTAMATE--HOMOCYSTEINE METHYL-T                   | I.A.12  |
| RSp0678 | RS01771 |       |      |       |      | -0.90 | 0.01 |       | TRANSCRIPTION REGULATOR TRANSCRIPTIONAL ACTIVATOR PROTEIN METR                   | I.A.12  |
| RSp0679 | RS01770 | 3.40  | 0.00 | 0.83  | 0.00 | -0.90 | 0.01 | 2.65  | OXIDOREDUCTASE PYRIDOXAMINE 5'-PHOSPHATE OXIDASE (PNP/PMP OXIDA                  | I.A.10  |
| RSp0680 | RS01769 | 4.24  | 0.00 | 1.04  | 0.00 | -0.96 | 0.00 | 2.12  | DIAMINOPIMELATE DECARBOXYLASE                                                    | I.A.13  |
| RSp0681 | RS01768 | 3.26  | 0.00 | 0.76  | 0.00 | -0.77 | 0.00 | 2.18  | INDOLE-3-GLYCEROL PHOSPHATE SYNTHASE                                             | I.A.6   |
| RSp0682 | RS01767 | 1.47  | 0.00 | 0.87  | 0.03 | -0.40 | 0.00 | 0.75  | ANTHRANILATE PHOSPHORIBOSYLTRANSFERASE (GLYCOSYLTRANSFERASE                      | I.A.6   |
| RSp0683 | RS01766 | 4.94  | 0.00 | 0.87  | 0.00 | -0.47 | 0.03 | 0.83  | OXIDOREDUCTASE TRIMETHYLAMINE DEHYDROGENASE                                      | II      |
| RSp0684 | RS01765 | 4.26  | 0.00 | 0.87  | 0.00 | -0.65 | 0.00 | 1.01  | COG0325, Predicted enzyme with a TIM-barrel fold                                 | V.I.C   |
| RSp0685 | RS01764 | 4.35  | 0.00 | 0.82  | 0.00 | -0.59 | 0.00 | 0.63  | CONSERVED HYPOTHETICAL PROTEIN                                                   | V.I.C   |
| RSp0686 | RS01763 | 3.93  | 0.00 | 0.58  | 0.00 |       |      | 0.60  | TRANSMEMBRANE                                                                    | V.I.C   |
| RSp0687 | RS01762 | -0.99 | 0.01 |       |      | 0.58  | 0.04 |       | TRANSCRIPTION REGULATOR                                                          | V.I.A   |
| RSp0688 | RS01761 |       |      |       |      | -0.45 | 0.04 |       | OXIDOREDUCTASE ACYL-CoA DEHYDROGENASE                                            | I.I.1   |
| RSp0689 | RS01760 |       |      |       |      | -0.12 | 0.04 | 0.91  | TRANSMEMBRANE COG5472, Predicted small integral membrane protein                 | V.I.C   |
| RSp0690 | RS01759 |       |      |       |      |       |      |       | TRANSCRIPTION REGULATOR COG2808, Transcriptional regulator                       | V.I.A   |
| RSp0691 | RS01758 |       |      |       |      |       |      |       | FUMARYLACETOACETASE (FUMARYLACETOACETATE HYDROLASE)                              | I.I.3   |
| RSp0692 | RS01757 |       |      |       |      |       |      |       | OXIDOREDUCTASE HOMOGENTISATE 1,2-DIOXYGENASE DIOXYGENASE                         | I.I.3   |
| RSp0693 | RS01756 |       |      |       |      |       |      |       | TRANSCRIPTION REGULATOR TRANSCRIPTION REGULATOR                                  | V.I.A   |
| RSp0694 | RS01755 |       |      | -7.88 | 0.00 | 7.44  | 0.00 | 2.38  | COG0346, Lactoylglutathione lyase and related lyases                             | I       |
| RSp0695 | RS01754 |       |      | -6.81 | 0.00 | 6.90  | 0.00 | 3.04  | OXIDOREDUCTASE TRYPTOPHAN-2,3-DIOXYGENASE                                        | I.A.6   |
| RSp0696 | RS01753 |       |      | -6.37 | 0.00 | 5.69  | 0.00 | 2.50  | SIGNAL PEPTIDE COG0644, Dehydrogenases (flavoproteins)                           | I       |
| RSp0697 | RS01752 |       |      | -7.32 | 0.00 | 6.34  | 0.00 | 0.97  | COG0520, Selenocysteine lyase                                                    | I       |
| RSp0698 | RS01751 |       |      | -6.97 | 0.00 | 7.20  | 0.00 | 3.15  | OXIDOREDUCTASE DEHYDROGENASE/REDUCTASE                                           | I       |
| RSp0699 | RS01750 |       |      | -5.62 | 0.00 | 6.25  | 0.00 | 1.27  | AMINOTRANSFERASE                                                                 | I       |
| RSp0700 | RS01749 |       |      | 0.51  | 0.03 |       |      |       | PEPTIDE CHAIN RELEASE FACTOR HOMOLOG                                             | II.B.7  |
| RSp0701 | RS01748 |       |      | 0.47  | 0.03 | -0.52 | 0.00 | -0.71 | RTCB-LIKE PROTEIN                                                                | V.I.C   |
| RSp0702 | RS01747 |       |      | -1.97 | 0.01 |       |      |       | CONSERVED HYPOTHETICAL PROTEIN                                                   | V.I.C   |
| RSp0703 | RS01746 |       |      |       |      |       |      |       | OXIDOREDUCTASE COG0654, 2-polyphenyl-6-methoxyphenol hydroxylase and relat       | I       |
| RSp0704 | RS01745 |       |      |       |      | -0.73 | 0.02 |       | COG0491, Zn-dependent hydrolases, including glyoxylases                          | V.I.A   |
| RSp0705 | RS01744 |       |      | 0.68  | 0.03 |       |      |       | TRANSCRIPTION REGULATOR                                                          | V.I.A   |
| RSp0706 | RS01743 |       |      |       |      | -0.34 | 0.02 |       | ABC TRANSPORTER AMINO-ACID TRANSMEMBRANE PROTEIN                                 | IV.D.2  |
| RSp0707 | RS01742 |       |      |       |      |       |      |       | ABC TRANSPORTER AMINO-ACID COMPOSITE ATP-BINDING TRANSMEMBRANE                   | IV.D.2  |
| RSp0708 | RS01741 |       |      |       |      |       |      | 0.83  | ABC TRANSPORTER AMINO-ACID COMPOSITE ATP-BINDING TRANSMEMBRANE                   | IV.D.2  |
| RSp0709 | RS01740 |       |      |       |      | 0.26  | 0.00 | 1.41  | SIGNAL PEPTIDE                                                                   | V.I.C   |
| RSp0710 | RS01739 |       |      |       |      |       |      | 1.21  | OXIDOREDUCTASE CYTOCHROME P-450-LIKE MONOOXYGENASE                               | I.G.1   |
| RSp0711 | RS01738 |       |      |       |      | -0.42 | 0.01 |       | TRANSMEMBRANE                                                                    | V.I.C   |
| RSp0712 | RS01737 |       |      |       |      |       |      | -0.65 | TRANSMEMBRANE COG5486, Predicted metal-binding integral membrane protein         | III.B.1 |
| RSp0713 | RS01736 |       |      |       |      | -0.50 | 0.04 | -0.45 | CONSERVED HYPOTHETICAL PROTEIN                                                   | V.I.C   |
| RSp0714 | RS01735 |       |      | 0.73  | 0.02 | -0.30 | 0.01 |       | CONSERVED HYPOTHETICAL PROTEIN                                                   | V.I.C   |
| RSp0715 | RS01734 |       |      |       |      |       |      |       | D-ALANINE AMINOTRANSFERASE (D-ASPARTATE AMINOTRANSFERASE)                        | I.F.14  |
| RSp0716 | RS01733 |       |      |       |      | -1.69 | 0.00 |       | SIGNAL PEPTIDE                                                                   | V.I.B   |
| RSp0717 | RS01732 |       |      |       |      | -0.64 | 0.03 |       | HYPOTHETICAL PROTEIN                                                             | V.I.D   |
| RSp0718 | RS01731 |       |      |       |      | -1.18 | 0.00 |       | HYPOTHETICAL PROTEIN                                                             | V.I.D   |
| RSp0719 | RS01730 |       |      | 0.70  | 0.00 | -1.09 | 0.00 |       | COG1858, Cytochrome c peroxidase                                                 | I       |
| RSp0720 | RS01729 |       |      |       |      | -1.02 | 0.03 |       | SIGNAL PEPTIDE                                                                   | V.I.C   |
| RSp0721 | RS01728 |       |      |       |      | -0.44 | 0.05 |       | SIGNAL PEPTIDE                                                                   | V.I.C   |
| RSp0722 | RS01727 |       |      |       |      | -0.31 | 0.01 | 1.11  | TRANSMEMBRANE                                                                    | V.I.C   |
| RSp0723 | RS01726 |       |      |       |      |       |      |       | COG1712, Predicted dinucleotide-utilizing enzyme                                 | V.I.C   |
| RSp0724 | RS01725 |       |      |       |      |       |      |       | TRANSMEMBRANE                                                                    | V.I.D   |
| RSp0725 | RS01724 |       |      |       |      |       |      | -1.32 | HYPOTHETICAL PROTEIN                                                             | V.I.D   |
| RSp0726 | RS01723 |       |      |       |      |       |      |       | OXIDOREDUCTASE COG0535, Predicted Fe-S oxidoreductases                           | V.I.C   |
| RSp0727 | RS01722 |       |      |       |      | -0.40 | 0.04 |       | TRANSMEMBRANE MFS TRANSPORTER                                                    | IV.D    |
| RSp0728 | RS01721 |       |      |       |      | -0.34 | 0.01 |       | CONSERVED HYPOTHETICAL PROTEIN                                                   | V.I.C   |
| RSp0729 | RS01720 |       |      |       |      | -1.00 | 0.00 |       | CONSERVED HYPOTHETICAL PROTEIN                                                   | V.I.C   |
| RSp0730 | RS01719 |       |      |       |      | 0.32  | 0.01 |       | HYPOTHETICAL PROTEIN                                                             | V.I.D   |
| RSp0731 | RS01718 |       |      |       |      |       |      |       | CONSERVED HYPOTHETICAL PROTEIN                                                   | V.I.C   |
| RSp0732 | RS01717 |       |      |       |      | 0.77  | 0.01 |       | TRANSMEMBRANE COG3000, Sterol desaturase                                         | I       |
| RSp0733 | RS01716 |       |      |       |      | 2.35  | 0.00 |       | TREHALOSE-6-PHOSPHATE SYNTHASE (ALPHA,ALPHA-TREHALOSE-PHOSPHAT                   | IV.F.2  |
| RSp0734 | RS01715 |       |      |       |      | -5.90 | 0.00 | 5.74  | TRANSMEMBRANE                                                                    | V.I.D   |
| RSp0735 | RS01714 |       |      |       |      |       |      | 4.07  | HYPOTHETICAL PROTEIN                                                             | V.I.D   |
| RSp0736 | RS01713 |       |      |       |      | 0.45  | 0.04 |       | CONSERVED HYPOTHETICAL PROTEIN                                                   | V.I.B   |
| RSp0737 | RS01712 |       |      |       |      |       |      |       | CONSERVED HYPOTHETICAL PROTEIN                                                   | V.I.C   |
| RSp0738 | RS01711 |       |      |       |      |       |      | -1.31 | TRANSMEMBRANE                                                                    | V.I.C   |
| RSp0739 | RS01710 |       |      |       |      |       |      | -2.39 | CONSERVED HYPOTHETICAL PROTEIN                                                   | V.I.C   |
| RSp0740 | RS01968 |       |      |       |      |       |      |       | HYPOTHETICAL PROTEIN                                                             | V.I.D   |
| RSp0741 | RS01967 |       |      |       |      |       |      |       | VGR-RELATED PROTEIN                                                              | V.I.C   |
| RSp0742 | RS01966 |       |      |       |      | -0.97 | 0.00 |       | TRANSMEMBRANE                                                                    | V.I.C   |
| RSp0743 | RS01965 |       |      |       |      | -0.94 | 0.00 |       | CONSERVED HYPOTHETICAL PROTEIN                                                   | V.I.C   |
| RSp0744 | RS01964 |       |      | 0.43  | 0.03 | -0.92 | 0.00 |       | CONSERVED HYPOTHETICAL PROTEIN                                                   | V.I.C   |
| RSp0745 | RS01963 |       |      |       |      | -0.98 | 0.00 | -2.64 | LIPOPROTEIN                                                                      | V.I.C   |
| RSp0746 | RS01962 |       |      |       |      | -1.01 | 0.00 | -1.32 | CONSERVED HYPOTHETICAL PROTEIN                                                   | V.I.C   |
| RSp0747 | RS01961 |       |      | 0.33  | 0.03 | -1.14 | 0.00 | -1.58 | CONSERVED HYPOTHETICAL PROTEIN                                                   | V.I.C   |
| RSp0748 | RS01960 |       |      |       |      | -1.19 | 0.00 | -0.60 | LIPOPROTEIN                                                                      | V.I.C   |
| RSp0749 | RS01959 |       |      |       |      | -1.24 | 0.00 | -0.95 | CONSERVED HYPOTHETICAL PROTEIN                                                   | V.I.C   |
| RSp0750 | RS01958 |       |      |       |      | -1.24 | 0.00 | -0.95 | CONSERVED HYPOTHETICAL PROTEIN                                                   | V.I.C   |
| RSp0751 | RS01957 |       |      |       |      | -0.24 | 0.01 | 0.59  | CONSERVED HYPOTHETICAL PROTEIN                                                   | V.I.C   |
| RSp0752 | RS01956 |       |      |       |      | 0.54  | 0.01 | -0.93 | CONSERVED HYPOTHETICAL PROTEIN                                                   | V.I.C   |
| RSp0753 | RS01955 |       |      |       |      | 0.45  | 0.02 | -0.83 | CONSERVED HYPOTHETICAL PROTEIN                                                   | V.I.C   |
| RSp0754 | RS01954 |       |      |       |      | 0.78  | 0.01 | -0.97 | CONSERVED HYPOTHETICAL PROTEIN                                                   | V.I.C   |
| RSp0755 | RS01953 |       |      |       |      |       |      |       | CLPAB-TYPE CHAPERONE                                                             | I.A.4   |
| RSp0756 | RS01952 |       |      |       |      |       |      |       | VGR-RELATED PROTEIN                                                              | V.I.C   |
| RSp0757 | RS01951 |       |      |       |      | 0.70  | 0.00 | -0.88 | HYPOTHETICAL PROTEIN                                                             | V.I.D   |
| RSp0758 | RS01950 |       |      |       |      | 0.54  | 0.04 | -0.94 | TRANSMEMBRANE                                                                    | V.I.B   |
| RSp0759 | RS01949 |       |      |       |      | 0.78  | 0.02 | -1.12 | TRANSMEMBRANE                                                                    | V.I.D   |
| RSp0760 | RS01948 |       |      |       |      | 0.66  | 0.01 | -0.83 | HYPOTHETICAL PROTEIN                                                             | V.I.D   |
| RSp0761 | RS01947 |       |      |       |      |       |      | -0.41 | TRANSMEMBRANE                                                                    | V.I.D   |
| RSp0762 | RS01946 |       |      |       |      | 0.82  | 0.00 | -0.52 | HYPOTHETICAL PROTEIN                                                             | V.I.D   |
| RSp0763 | RS01945 |       |      |       |      |       |      | -0.59 | CONSERVED HYPOTHETICAL PROTEIN                                                   | V.I.C   |
| RSp0764 | RS01944 |       |      |       |      |       |      | -0.71 | CONSERVED HYPOTHETICAL PROTEIN                                                   | V.I.C   |
| RSp0765 | RS01943 |       |      |       |      | 0.56  | 0.04 | -0.28 | CONSERVED HYPOTHETICAL PROTEIN                                                   | V.I.C   |
| RSp0766 | RS01942 |       |      |       |      | 0.65  | 0.00 | -0.58 | CONSERVED HYPOTHETICAL PROTEIN                                                   | V.I.C   |
| RSp0767 | RS01941 |       |      |       |      |       |      | 0.92  | TRANSMEMBRANE                                                                    | V.I.D   |
| RSp0768 | RS01940 |       |      |       |      | 0.90  | 0.00 | -0.55 | COG2885, Outer membrane protein and related peptidoglycan-associated (lipo)prote | V.I.B   |
| RSp0769 | RS01939 |       |      |       |      | 0.68  | 0.01 |       | HYPOTHETICAL PROTEIN                                                             | V.I.B   |
| RSp0770 | RS01938 |       |      |       |      | 0.37  | 0.00 | -0.64 | TRANSMEMBRANE                                                                    | V.I.C   |
| RSp0771 | RS01937 |       |      |       |      | 0.42  | 0.02 | -0.69 | TRANSMEMBRANE                                                                    | V.I.B   |
| RSp0772 | RS01936 |       |      |       |      |       |      | -0.79 | CONSERVED HYPOTHETICAL PROTEIN                                                   | V.I.C   |
|         |         |       |      |       |      |       |      | -0.97 | TRANSMEMBRANE                                                                    | V.I.B   |
|         |         |       |      |       |      |       |      |       | TRANSMEMBRANE                                                                    | V.I.D   |
|         |         |       |      |       |      |       |      | -0.90 | TRANSMEMBRANE                                                                    | V.I.C   |
|         |         |       |      |       |      |       |      | -0.76 | VGR-RELATED PROTEIN                                                              | V.I.C   |
|         |         |       |      |       |      |       |      | -0.47 | TRANSMEMBRANE                                                                    | V.I.C   |
|         |         |       |      |       |      |       |      | -0.32 | CONSERVED HYPOTHETICAL PROTEIN                                                   | V.I.C   |
|         |         |       |      |       |      |       |      | -0.94 | CONSERVED HYPOTHETICAL PROTEIN                                                   | V.I.C   |
|         |         |       |      |       |      |       |      | -0.93 | CONSERVED HYPOTHETICAL PROTEIN                                                   | V.I.C   |
|         |         |       |      |       |      |       |      | 0.81  | SIGNAL PEPTIDE                                                                   | V.I.C   |

|         |         |      |      |       |      |       |      |       |      |                                                                                      |          |
|---------|---------|------|------|-------|------|-------|------|-------|------|--------------------------------------------------------------------------------------|----------|
| RSp0773 | RS01935 | 0.63 | 0.01 | -0.88 | 0.00 | -3.33 | 0.00 | -2.57 | 0.00 | SIGNAL PEPTIDE                                                                       | V.I.D    |
| RSp0774 | RS01934 |      |      |       |      |       |      |       |      | HYPOTHETICAL PROTEIN                                                                 | V.I.D    |
| RSp0775 | RS01933 |      |      |       |      |       |      |       |      | HYPOTHETICAL PROTEIN                                                                 | V.I.D    |
| RSp0776 | RS01932 |      |      |       |      |       |      |       |      | HYPOTHETICAL PROTEIN                                                                 | V.I.D    |
| RSp0777 | RS01931 |      |      |       |      |       |      |       |      | TRANSMEMBRANE                                                                        | V.I.D    |
| RSp0778 | RS01929 |      |      | -0.81 | 0.01 |       |      |       |      | TRANSCRIPTION REGULATOR TRANSCRIPTIONAL ACTIVATOR PROTEIN OF QUINONE                 | I.E.1    |
| RSp0779 | RS01928 | 2.23 | 0.01 | -2.10 | 0.00 |       |      |       |      | AUTONUCLEIC ACID SYNTHASE (ACYL HOMOSERINE LACTONE SYNTHASE)                         | I.E.1    |
| RSp0780 | RS01927 | 2.21 | 0.00 | 1.80  | 0.02 | -2.29 | 0.00 |       |      | Abyhdrolase                                                                          | I.D.1    |
| RSp0781 | RS01926 |      |      | 2.42  | 0.03 | -1.92 | 0.00 |       |      | COG0266, Cystathionine beta-lyases/cystathionine gamma-synthases                     | I        |
| RSp0782 | RS01925 | 1.35 | 0.05 | 2.65  | 0.02 | -2.19 | 0.00 |       |      | tRNA synthetase - related protein                                                    | I        |
| RSp0783 | RS01924 |      |      | 2.09  | 0.05 | -1.81 | 0.00 | -1.06 | 0.04 | COG0236, Acyl carrier protein                                                        | I.D      |
| RSp0784 | RS01923 |      |      | 2.58  | 0.02 | -2.36 | 0.00 |       |      | TRANSMEMBRANE FATTY ACID DESATURASE                                                  | I.I.1    |
| RSp0785 | RS01922 |      |      | 2.09  | 0.01 | -1.66 | 0.00 | -1.00 | 0.03 | HYPOTHETICAL PROTEIN                                                                 | V.I.D    |
| RSp0786 | RS01921 |      |      | 2.26  | 0.02 | -2.02 | 0.00 | -1.87 | 0.00 | COG0332, 3-oxoacyl-[acyl-carrier-protein]                                            | I.B.16   |
| RSp0787 | RS01920 |      |      | 2.51  | 0.02 | -2.24 | 0.00 | -1.30 | 0.02 | TRANSMEMBRANE COG0318, Acyl-CoA synthetases (AMP-forming)/AMP-acid ligase            | I        |
| RSp0788 | RS01919 |      |      | 2.44  | 0.02 | -2.42 | 0.00 |       |      | COG2192, Predicted carbamoyl transferase                                             | I        |
| RSp0789 | RS01918 |      |      | 2.25  | 0.02 | -1.27 | 0.00 | -0.98 | 0.01 | HYPOTHETICAL PROTEIN                                                                 | V.I.B    |
| RSp0790 | RS01917 |      |      | 2.00  | 0.04 | -2.27 | 0.00 |       |      | COG0596, Predicted hydrolases or acyltransferases (alpha/beta hydrolase superfamily) | I        |
| RSp0791 | RS01916 |      |      | 1.91  | 0.04 |       |      | -0.90 | 0.00 | COG0236, Acyl carrier protein                                                        | I        |
| RSp0792 | RS01915 |      |      | 2.69  | 0.03 | -2.49 | 0.00 |       |      | TRANSMEMBRANE FATTY ACID DESATURASE                                                  | I.I.1    |
| RSp0793 | RS01914 |      |      |       |      | -1.55 | 0.00 | -3.76 | 0.03 | HYPOTHETICAL PROTEIN                                                                 | V.I.D    |
| RSp0794 | RS01913 |      |      | 1.13  | 0.01 | 0.26  | 0.03 |       |      | AMINOTRANSFERASE                                                                     | I.F.14   |
| RSp0795 | RS01912 |      |      | 0.41  | 0.01 | -0.81 | 0.00 |       |      | COG4757, Predicted alpha/beta hydrolase                                              | I.I      |
| RSp0796 | RS01911 |      |      |       |      |       |      |       |      | TRANSCRIPTION REGULATOR                                                              | V.I.A    |
| RSp0797 | RS01910 |      |      |       |      |       |      |       |      | TRANSMEMBRANE TRANSPORT PROTEIN                                                      | I.V.D    |
| RSp0798 | RS01909 |      |      |       |      |       |      |       |      | HYPOTHETICAL PROTEIN                                                                 | V.I.B    |
| RSp0799 | RS01908 |      |      | 0.83  | 0.01 |       |      |       |      | COG0389, Nucleotidyltransferase/DNA polymerase involved in DNA repair                | I.I.B.8  |
| RSp0800 | RS01907 |      |      |       |      |       |      |       |      | DNA POLYMERASE III (ALPHA CHAIN)                                                     | I.I.B.8  |
| RSp0801 | RS01906 |      |      |       |      | -0.48 | 0.03 | -0.47 | 0.00 | TRANSCRIPTION REGULATOR                                                              | V.I.A    |
| RSp0802 | RS01905 |      |      |       |      |       |      | -0.26 | 0.05 | TRANSMEMBRANE COG0471, Di- and tricarboxylate transporters                           | I.V.D    |
| RSp0803 | RS01904 |      |      |       |      | 0.91  | 0.00 | -0.57 | 0.04 | SIGNAL PEPTIDE HEMAGGLUTININ-RELATED PROTEIN                                         | V.I.B    |
| RSp0804 | RS01903 |      |      | 0.57  | 0.00 |       |      | -1.32 | 0.00 | ELONGATION FACTOR G (EF-G PROTEIN)                                                   | I.I.B.7  |
| RSp0805 | RS01902 |      |      |       |      |       |      |       |      | TRANSCRIPTION REGULATOR                                                              | V.I.A    |
| RSp0806 | RS01901 |      |      |       |      | -0.63 | 0.00 |       |      | TRANSMEMBRANE                                                                        | V.I.C    |
| RSp0807 | RS01900 |      |      |       |      | 1.53  | 0.00 |       |      | FERREDOXIN                                                                           | I.G.1    |
| RSp0808 | RS01899 |      |      |       |      |       |      |       |      | TRANSMEMBRANE                                                                        | V.I.C    |
| RSp0809 | RS01898 |      |      |       |      |       |      |       |      | HYPOTHETICAL PROTEIN                                                                 | V.I.B    |
| RSp0810 | RS01897 |      |      |       |      | -0.79 | 0.01 | -0.91 | 0.05 | ATP SYNTHASE EPSILON CHAIN                                                           | I.E.2    |
| RSp0811 | RS01896 |      |      |       |      |       |      |       |      | SIGNAL PEPTIDE TONB-DEPENDENT RECEPTOR PROTEIN                                       | I.II.B.2 |
| RSp0812 | RS01895 |      |      |       |      |       |      | -0.53 | 0.04 | TRANSMEMBRANE                                                                        | V.I.C    |
| RSp0813 | RS01894 |      |      | -1.97 | 0.01 | 0.60  | 0.05 | -3.62 | 0.01 | TRANSMEMBRANE SIGNAL TRANSDUCTION PROTEIN EAL - GGDEF DOMAINS                        | V.I.A    |
| RSp0814 | RS01893 |      |      |       |      |       |      |       |      | OXIDOREDUCTASE MALATE-QUINONE OXIDOREDUCTASE                                         | I.H.6    |
| RSp0815 | RS01892 |      |      |       |      |       |      | -1.38 | 0.03 | TRANSCRIPTION REGULATOR                                                              | V.I.A    |
| RSp0816 | RS01891 |      |      |       |      |       |      |       |      | TRANSCRIPTION REGULATOR                                                              | V.I.A    |
| RSp0817 | RS01890 |      |      |       |      |       |      |       |      | OUTER MEMBRANE DRUG EFFLUX LIPOPROTEIN                                               | I.V.E    |
| RSp0818 | RS01889 |      |      |       |      |       |      |       |      | TRANSMEMBRANE DRUG EFFLUX PROTEIN                                                    | I.V.D    |
| RSp0819 | RS01888 |      |      |       |      |       |      |       |      | DRUG EFFLUX LIPOPROTEIN                                                              | I.V.E    |
| RSp0820 | RS01887 |      |      |       |      |       |      | -0.39 | 0.01 | COG2706, 3-carboxymuconate cyclase                                                   | I        |
| RSp0821 | RS01886 |      |      |       |      |       |      |       |      | TRANSMEMBRANE                                                                        | V.I.C    |
| RSp0822 | RS05373 |      |      | -2.15 | 0.01 | 3.61  | 0.00 | 3.75  | 0.00 | AvrPphF-RELATED PROTEIN                                                              | V.I.B    |
| RSp0823 | RS05372 |      |      |       |      | 1.03  | 0.01 |       |      | TRANSCRIPTION REGULATOR TRANSCRIPTIONAL REGULATOR                                    | V.I.A    |
| RSp0824 | RS05371 |      |      | -0.83 | 0.01 | 0.89  | 0.00 | 0.70  | 0.02 | GLUCONOLACTONASE (D-GLUCONO-DELTA-LACTONE LACTONOHYDROLASE)                          | I        |
| RSp0825 | RS05370 |      |      | -2.77 | 0.00 | -5.99 | 0.00 | 5.76  | 0.03 | COG0421, Spermidine synthase                                                         | I.F.15   |
| RSp0826 | RS05369 |      |      |       |      |       |      |       |      | 5-DEHYDRO-4-DEOXYGLUCARATE DEHYDRATASE                                               | I.F      |
| RSp0827 | RS05368 |      |      |       |      |       |      |       |      | COG1012, NAD-dependent aldehyde dehydrogenases                                       | I        |
| RSp0828 | RS05367 |      |      |       |      |       |      |       |      | TRANSMEMBRANE GLUCARATE TRANSPORTER (D-GLUCARATE PERMEASE)                           | I.V.D    |
| RSp0829 | RS05366 |      |      |       |      |       |      |       |      | GLUCARATE DEHYDRATASE                                                                | I.I.4    |
| RSp0830 | RS05365 |      |      |       |      |       |      |       |      | D-GALACTARATE DEHYDRATASE (D-GALACTARATE DEHYDROGENASE)                              | I        |
| RSp0831 | RS05364 |      |      |       |      |       |      |       |      | CONSERVED HYPOTHETICAL PROTEIN                                                       | V.I.C    |
| RSp0832 | RS05363 |      |      |       |      |       |      |       |      | COG3386, Gluconolactonase                                                            | I        |
| RSp0833 | RS05362 |      |      | -0.64 | 0.00 | 1.78  | 0.00 | 2.20  | 0.03 | TRANSMEMBRANE POLYGALACTURONASE                                                      | I.IA.3   |
| RSp0834 | RS05361 |      |      |       |      | 2.04  | 0.00 | 1.27  | 0.01 | TRANSMEMBRANE HEXURONATE TRANSPORTER                                                 | I.V.D    |
| RSp0835 | RS05360 |      |      | 0.80  | 0.04 |       |      |       |      | BIFUNCTIONAL NMN ADENYLYLTRANSFERASE/NUDIX HYDROLASE : NICOTINAMIDE                  | I.B.9    |
| RSp0836 | RS05359 |      |      |       |      | 0.44  | 0.00 |       |      | NICOTINATE PHOSPHORIBOSYLTRANSFERASE-RELATED PROTEIN                                 | I        |
| RSp0837 | RS05358 |      |      | -2.70 | 0.00 | 1.00  | 0.00 | 3.65  | 0.00 | HYPOTHETICAL PROTEIN                                                                 | V.I.D    |
| RSp0838 | RS05357 |      |      |       |      |       |      |       |      | HYPOTHETICAL PROTEIN                                                                 | V.I.D    |
| RSp0839 | RS05356 |      |      | -4.87 | 0.00 | 5.74  | 0.00 | 3.89  | 0.00 | HYPOTHETICAL PROTEIN                                                                 | V.I.B    |
| RSp0840 | RS05355 |      |      | -1.35 | 0.02 | 2.20  | 0.00 | 2.58  | 0.00 | TRANSMEMBRANE METHYL-ACCEPTING CHEMOTAXIS TRANSDUCER                                 | I.V.C    |
| RSp0841 | RS05354 |      |      | -4.14 | 0.00 | -7.08 | 0.00 | 7.19  | 0.00 | LIPOPROTEIN                                                                          | V.I.B    |
| RSp0842 | RS05353 |      |      | -1.82 | 0.00 | -3.98 | 0.00 | 4.11  | 0.00 | LEUCINE-RICH-REPEAT PROTEIN                                                          | V.I.B    |
| RSp0843 | RS05352 |      |      |       |      |       |      | 3.77  | 0.00 | TRANSCRIPTION REGULATOR                                                              | V.I.A    |
| RSp0844 | RS05351 |      |      | -1.35 | 0.03 | 1.40  | 0.00 | 2.22  | 0.00 | COG0702, PREDICTED NUCLEOSIDE-DIPHOSPHATE-SUGAR EPIMERASE                            | I        |
| RSp0845 | RS05350 |      |      | -3.07 | 0.00 | 3.39  | 0.00 | 2.68  | 0.01 | HYPOTHETICAL PROTEIN                                                                 | V.I.D    |
| RSp0846 | RS05349 |      |      | -1.15 | 0.03 | 0.49  | 0.00 |       |      | AWR TYPE III EFFECTOR FAMILY PROTEIN                                                 | V.I.C    |
| RSp0847 | RS05348 |      |      |       |      |       |      |       |      | AWR TYPE III EFFECTOR FAMILY PROTEIN                                                 | V.I.C    |
| RSp0848 | RS01619 |      |      | -4.65 | 0.00 | 5.62  | 0.00 | 3.99  | 0.00 | HYPOTHETICAL PROTEIN                                                                 | V.I.D    |
| RSp0849 | RS01620 |      |      |       |      |       |      | -1.20 | 0.02 | TRANSCRIPTION REGULATOR 3-COMPARTMENT SIGNAL TRANSDUCTION SYSTEM, COMF               | I.E.1    |
| RSp0850 | RS01621 |      |      |       |      | -0.46 | 0.03 |       |      | TRANSMEMBRANE 3-COMPARTMENT SIGNAL TRANSDUCTION SYSTEM, COMF                         | I.E.1    |
| RSp0851 | RS01622 |      |      |       |      |       |      |       |      | TRANSCRIPTION REGULATOR TRANSCRIPTIONAL REGULATOR PRHJ                               | I.E.1    |
| RSp0852 | RS01623 |      |      | -1.19 | 0.01 | 2.26  | 0.00 | 1.37  | 0.02 | TRANSCRIPTION REGULATOR RESPONSE REGULATOR                                           | I.E.1    |
| RSp0853 | RS01624 |      |      | -5.53 | 0.01 | 6.91  | 0.00 |       |      | CONSERVED HYPOTHETICAL PROTEIN                                                       | V.I.C    |
| RSp0854 | RS01625 |      |      | -7.19 | 0.00 | 7.85  | 0.00 | 3.38  | 0.00 | HRP-RELATED PROTEIN                                                                  | V.I.B    |
| RSp0855 | RS01626 |      |      | -3.65 | 0.00 | -7.68 | 0.03 | 7.21  | 0.00 | HRP PILUS SUBUNIT HRPY                                                               | I.V.E.2  |
| RSp0856 | RS01627 |      |      | -4.56 | 0.00 | -6.67 | 0.00 | 6.34  | 0.00 | HRPX                                                                                 | I.V.E.2  |
| RSp0857 | RS01628 |      |      | -1.96 | 0.01 | -4.34 | 0.00 | 5.71  | 0.00 | TRANSMEMBRANE HRPW                                                                   | I.V.E.2  |
| RSp0858 | RS01629 |      |      |       |      | -4.45 | 0.00 | 4.08  | 0.00 | HRPV                                                                                 | V.I.C    |
| RSp0859 | RS01630 |      |      | -3.91 | 0.00 | -7.07 | 0.00 | 7.62  | 0.00 | TRANSMEMBRANE HRP CONSERVED PROTEIN HRCS                                             | I.V.E.2  |
| RSp0860 | RS01631 |      |      |       |      | 7.89  | 0.00 | 5.12  | 0.00 | TRANSMEMBRANE HRP CONSERVED PROTEIN HRCS                                             | I.V.E.2  |
| RSp0861 | RS01632 |      |      | -5.74 | 0.00 | 7.23  | 0.01 | 5.73  | 0.00 | HRP CONSERVED PROTEIN HRCQ                                                           | I.V.E.2  |
| RSp0862 | RS01633 |      |      | -5.45 | 0.00 | 5.58  | 0.00 | 2.68  | 0.01 | HRP ASSOCIATED PROTEIN HpaP                                                          | V.I.C    |
| RSp0863 | RS01634 |      |      | -2.55 | 0.00 | 3.43  | 0.00 | 1.91  | 0.00 | TRANSMEMBRANE HRP CONSERVED PROTEIN HRCV                                             | I.V.E.2  |
| RSp0864 | RS01635 |      |      |       |      | 1.01  | 0.00 |       |      | TRANSMEMBRANE HRP CONSERVED PROTEIN HRCU                                             | I.V.E.2  |
| RSp0865 | RS01636 |      |      | -3.36 | 0.00 | -6.96 | 0.00 | 6.35  | 0.00 | HRPK                                                                                 | I.V.E.2  |
| RSp0866 | RS01637 |      |      |       |      | -7.61 | 0.00 | 8.00  | 0.00 | HRPJ PROTEIN                                                                         | V.I.C    |
| RSp0867 | RS01638 |      |      | -1.77 | 0.01 | -4.76 | 0.00 | 6.09  | 0.00 | TRANSMEMBRANE HRP CONSERVED LIPOPROTEIN HRCJ                                         | I.V.E.2  |
| RSp0868 | RS01639 |      |      |       |      | -6.64 | 0.00 | 7.37  | 0.00 | HRPH                                                                                 | V.I.C    |
| RSp0869 | RS01640 |      |      |       |      | -5.43 | 0.00 | 6.28  | 0.00 | HRPF                                                                                 | I.V.E.2  |
| RSp0870 | RS01641 |      |      |       |      | -3.98 | 0.00 | 4.60  | 0.00 | HRP CONSERVED PROTEIN HRCN                                                           | I.V.E.2  |
| RSp0871 | RS01642 |      |      |       |      | -5.71 | 0.00 | 6.03  | 0.00 | HRPD                                                                                 | V.I.C    |
| RSp0872 | RS01643 |      |      |       |      | -4.02 | 0.00 | 5.88  | 0.00 | TRANSMEMBRANE HRP CONSERVED PROTEIN HRCT                                             | I.V.E.2  |
| RSp0873 | RS01644 |      |      | -3.09 | 0.00 | -5.10 | 0.00 | 7.69  | 0.00 | TRANSCRIPTION REGULATOR REGULATORY PROTEIN HRPB                                      | I.E.1    |
| RSp0874 | RS01645 |      |      | -0.85 | 0.00 | -1.33 | 0.00 | 1.08  | 0.00 | TRANSMEMBRANE HRP CONSERVED PROTEIN HRCC                                             | I.V.E.2  |
| RSp0875 | RS01646 |      |      |       |      | -5.69 | 0.00 | 5.99  | 0.00 | POPC PROTEIN                                                                         | V.I.E    |
| RSp0876 | RS01647 |      |      | -3.94 | 0.00 | -8.93 | 0.00 | 8.89  | 0.00 | POPB PROTEIN                                                                         | V.I.E    |
| RSp0877 | RS01648 |      |      | -5.80 | 0.00 | -8.95 | 0.00 | 9.14  | 0.00 | POPA PROTEIN                                                                         | V.I.E    |
| RSp0878 | RS01649 |      |      |       |      |       |      | 0.63  | 0.00 | SIGNAL PEPTIDE OUTER MEMBRANE RECEPTOR PROTEIN PRHA                                  | I.E.1    |
| RSp0879 | RS01650 |      |      | -1.79 | 0.03 | 3.20  | 0.00 | 2.72  | 0.00 | HYPOTHETICAL PROTEIN                                                                 | V.I.D    |
| RSp0880 | RS01651 |      |      |       |      | 1.35  | 0.00 |       |      | SIGNAL PEPTIDE POLYGALACTURONASE PRECURSOR (PECTINASE)                               | I.IA.3   |
| RSp0881 | RS01652 |      |      |       |      | -0.42 | 0.02 | 2.81  | 0.00 | TRANSMEMBRANE GLYCOSYL HYDROLASE                                                     | V.I.B    |
| RSp0882 | RS01653 |      |      | -5.23 | 0.00 | 6.16  | 0.00 | 4.61  | 0.00 | HYPOTHETICAL PROTEIN                                                                 | V.I.D    |
| RSp0883 | RS01654 |      |      | -4.56 | 0.02 | -1.36 | 0.00 | 1.30  | 0.00 | HYPOTHETICAL PROTEIN                                                                 | V.I.B    |
| RSp0884 | RS01655 |      |      | -0.45 | 0.02 | 0.48  | 0.01 | 0.60  | 0.01 | TRANSMEMBRANE                                                                        | V.I.B    |



|         |         |       |      |       |      |       |      |       |       |                                                                             |                      |         |
|---------|---------|-------|------|-------|------|-------|------|-------|-------|-----------------------------------------------------------------------------|----------------------|---------|
| RSp1001 | RSO2334 |       |      |       | 0,96 | 0,01  |      |       |       | SIGNAL PEPTIDE                                                              | VI.D                 |         |
| RSp1002 | RSO2335 |       |      |       | 0,76 | 0,04  |      |       |       | SIGNAL PEPTIDE TEK PROTEIN                                                  | VI.C                 |         |
| RSp1003 | RSO2336 |       |      | 0,42  | 0,05 |       |      |       |       | TRANSCRIPTION REGULATOR TRANSCRIPTION REGULATOR XPSR                        | III.A.1              |         |
| RSp1004 | RSO2337 |       |      |       |      | -0,62 | 0,01 |       |       | TRANSMEMBRANE DTDp-GLUCOSE 4,6-DEHYDRATASE                                  | II.B.2               |         |
| RSp1005 | RSO2338 |       |      |       | 0,43 | 0,03  |      | -1,37 | 0,00  | TRANSMEMBRANE                                                               | VI.B                 |         |
| RSp1006 | RSO2340 | 0,20  | 0,05 |       |      |       |      |       | -0,41 | 0,00                                                                        | EPS AMINOTRANSFERASE | III.A.1 |
| RSp1007 | RSO2341 |       |      |       |      |       |      |       |       | ACETYL TRANSFERASE                                                          | III.A.1              |         |
| RSp1008 | RSO2342 |       |      | 0,37  | 0,00 |       |      |       |       | TRANSMEMBRANE GLYCOSYL TRANSFERASE                                          | III.A.1              |         |
| RSp1009 | RSO2343 |       |      | 0,42  | 0,01 |       |      |       | -0,38 | 0,03                                                                        | GLYCOSYLTRANSFERASE  | III.A.1 |
| RSp1010 | RSO2344 |       |      |       |      |       |      |       |       | CONSERVED HYPOTHETICAL PROTEIN                                              | VI.C                 |         |
| RSp1011 | RSO2345 |       |      | 0,31  | 0,01 |       |      |       |       | OXIDOREDUCTASE COG1063, Threonine dehydrogenase and related Zn-dependent    | VI.C                 |         |
| RSp1012 | RSO2346 |       |      | 0,40  | 0,03 |       |      | -0,50 | 0,00  | COG0110, Acetyltransferase                                                  | VI.C                 |         |
| RSp1013 | RSO2347 | -0,46 | 0,00 | 0,26  | 0,01 | -0,61 | 0,01 | -0,92 | 0,03  | COG0438, Glycosyltransferase                                                | VI.C                 |         |
| RSp1014 | RSO2348 |       |      | 0,32  | 0,05 |       |      |       |       | TRANSMEMBRANE EPS I POLYSACCHARIDE EXPORT INNER MEMBRANE PRO                | III.A.1              |         |
| RSp1015 | RSO2349 |       |      |       |      |       |      |       |       | TRANSMEMBRANE EPS I POLYSACCHARIDE EXPORT INNER MEMBRANE PRO                | III.A.1              |         |
| RSp1016 | RSO2350 |       |      |       |      |       |      |       |       | OXIDOREDUCTASE NDP-N-ACETYL-D-GALACTOSAMINURONIC ACID DEHYDR                | II.B                 |         |
| RSp1017 | RSO2355 |       |      | 0,52  | 0,00 |       |      | -0,63 | 0,02  | UDP-N-ACETYLGLUCOSAMINE 2-EPIMERASE                                         | III.A.1              |         |
| RSp1018 | RSO2356 | 0,27  | 0,00 |       |      |       |      | -0,63 | 0,01  | TRANSMEMBRANE EPS I POLYSACCHARIDE EXPORT PROTEIN                           | III.A.1              |         |
| RSp1019 | RSO2353 | 0,34  | 0,02 | 0,43  | 0,01 |       |      | -0,81 | 0,00  | LOW MOLECULAR WEIGHT PROTEIN-TYROSINE-PHOSPHATASE                           | III.A.1              |         |
| RSp1020 | RSO2354 | 0,30  | 0,02 |       |      |       |      | -0,38 | 0,02  | TRANSMEMBRANE EPS I POLYSACCHARIDE EXPORT OUTER MEMBRANE PRO                | III.A.1              |         |
| RSp1021 | RSO2358 |       |      |       |      |       |      | -0,71 | 0,01  | HYPOTHETICAL PROTEIN                                                        | VI.D                 |         |
| RSp1022 | RSO2359 |       |      |       |      |       |      | 2,87  | 0,04  | HYPOTHETICAL PROTEIN                                                        | VI.D                 |         |
| RSp1023 | RSO2360 |       |      | 0,34  | 0,02 | -0,43 | 0,01 | 0,99  | 0,02  | TRANSCRIPTION REGULATOR RESPONSE REGULATOR                                  | VI.A                 |         |
| RSp1024 | RSO2361 |       |      |       |      | 1,86  | 0,00 |       |       | AWR TYPE III EFFECTOR FAMILY PROTEIN                                        | VI.C                 |         |
| RSp1025 | RSO2362 |       |      | -1,07 | 0,00 | 0,99  | 0,00 | 1,16  | 0,00  | TRANSMEMBRANE AMINO-ACID EFFLUX PROTEIN                                     | IV.D.2               |         |
| RSp1026 | RSO2363 |       |      |       |      |       |      | 1,02  | 0,05  | SIGNAL PEPTIDE                                                              | VI.C                 |         |
| RSp1027 | RSO2364 |       |      |       |      | -0,45 | 0,00 |       |       | TRANSMEMBRANE METHYL-ACCEPTING CHEMOTAXIS TRANSDUCER                        | VI.C                 |         |
| RSp1028 | RSO2365 |       |      |       |      | -0,54 | 0,03 | -1,72 | 0,02  | HYPOTHETICAL PROTEIN                                                        | VI.D                 |         |
| RSp1029 | RSO2366 |       |      |       |      |       |      |       |       | OXIDOREDUCTASE TRANSMEMBRANE ACYL-CoA DESATURASE (FATTY ACID [I             | I.1                  |         |
| RSp1030 | RSO2367 |       |      |       |      | -0,33 | 0,04 |       |       | COG3687, PREDICTED METAL- DEPENDENT HYDROLASE                               | VI.C                 |         |
| RSp1031 | RSO2368 |       |      |       |      | -1,94 | 0,01 | 3,50  | 0,00  | HYPOTHETICAL PROTEIN                                                        | VI.D                 |         |
| RSp1032 | RSO2369 |       |      |       |      | -1,07 | 0,00 | 1,68  | 0,00  | CONSERVED HYPOTHETICAL PROTEIN                                              | VI.C                 |         |
| RSp1033 | RSO2370 |       |      |       |      |       |      | -0,58 | 0,01  | COG2916, DNA-binding protein H-NS - related protein                         | VI.A                 |         |
| RSp1034 | RSO2371 |       |      |       |      | -0,71 | 0,00 |       |       | SIGNAL PEPTIDE                                                              | VI.C                 |         |
| RSp1035 | RSO2372 |       |      |       |      | -0,60 | 0,01 | -1,05 | 0,00  | CONSERVED HYPOTHETICAL PROTEIN                                              | VI.C                 |         |
| RSp1036 | RSO2373 |       |      |       |      | -0,52 | 0,00 | -0,51 | 0,04  | CONSERVED HYPOTHETICAL PROTEIN                                              | VI.C                 |         |
| RSp1037 | RSO2374 |       |      |       |      | -1,69 | 0,04 |       |       | TRANSMEMBRANE                                                               | VI.C                 |         |
| RSp1038 | RSO2375 |       |      |       |      | -0,56 | 0,00 |       |       | TRANSMEMBRANE LIPOPROTEIN                                                   | VI.D                 |         |
| RSp1039 | RSO2376 |       |      | 0,51  | 0,04 |       |      |       |       | TRANSMEMBRANE OUTER MEMBRANE CHANNEL LIPOPROTEIN                            | IV.D                 |         |
| RSp1040 | RSO2377 |       |      |       |      | -0,38 | 0,01 |       |       | TRANSMEMBRANE CATION EFFLUX SYSTEM PROTEIN                                  | IV.D.4               |         |
| RSp1041 | RSO2378 |       |      |       |      | -0,61 | 0,01 |       |       | TRANSMEMBRANE CATION TRANSPORTER PROTEIN                                    | IV.D.4               |         |
| RSp1042 | RSO2379 |       |      |       |      | -0,37 | 0,03 | -0,56 | 0,05  | TRANSCRIPTION REGULATOR TWO-COMPONENT RESPONSE REGULATOR                    | VI.A                 |         |
| RSp1043 | RSO2380 |       |      |       |      | -0,46 | 0,02 | -0,72 | 0,03  | TRANSCRIPTION REGULATOR TWO-COMPONENT SENSOR HISTIDINE KINASE               | VI.A                 |         |
| RSp1044 | RSO2381 |       |      |       |      | -0,40 | 0,02 |       |       | TRANSMEMBRANE COBALT-NICKEL-RESISTANCE SYSTEM PROTEIN                       | IV.G                 |         |
| RSp1045 | RSO2382 |       |      |       |      |       |      |       |       | HYPOTHETICAL PROTEIN                                                        | VI.B                 |         |
| RSp1046 | RSO2383 |       |      |       |      |       |      | -0,97 | 0,03  | TRANSMEMBRANE AMINO ACID TRANSPORTER PROTEIN                                | IV.D.2               |         |
| RSp1047 | RSO2384 |       |      |       |      | 1,17  | 0,00 |       |       | TRANSMEMBRANE TRANSPORTER PROTEIN                                           | IV.D                 |         |
| RSp1048 | RSO2385 |       |      |       |      | 0,56  | 0,00 |       |       | OXIDOREDUCTASE FORMATE DEHYDROGENASE                                        | I.H.2                |         |
| RSp1049 | RSO2386 |       |      |       |      | 0,49  | 0,00 |       |       | HYPOTHETICAL PROTEIN                                                        | VI.D                 |         |
| RSp1050 | RSO2387 |       |      |       |      |       |      |       |       | FORMATE DEHYDROGENASE ASSOCIATED PROTEIN (FDHD PROTEIN)                     | I.H.2                |         |
| RSp1051 | RSO2388 |       |      |       |      |       |      |       |       | SIGNAL TRANSDUCTION PROTEIN EAL DOMAIN                                      | VI.A                 |         |
| RSp1052 | RSO2389 |       |      |       |      |       |      | -0,82 | 0,01  | TRANSMEMBRANE POTASSIUM UPTAKE PROTEIN                                      | IV.D.4               |         |
| RSp1053 | RSO2390 |       |      |       |      | 0,63  | 0,00 | -0,82 | 0,01  | TRANSCRIPTION REGULATOR COLD SHOCK PROTEIN ACTIVATOR                        | VI.A                 |         |
| RSp1054 | RSO2391 | 0,24  | 0,03 |       |      |       |      | -0,50 | 0,03  | TRANSCRIPTION REGULATOR COLD SHOCK PROTEIN ACTIVATOR                        | VI.A                 |         |
| RSp1055 | RSO2392 |       |      |       |      | 0,36  | 0,03 | -1,06 | 0,02  | OXIDOREDUCTASE TRANSMEMBRANE ALDEHYDE DEHYDROGENASE                         | I.I.4                |         |
| RSp1056 | RSO2393 |       |      |       |      | -0,44 | 0,00 |       |       | BETA-ALANINE-PYRUVATE AMINOTRANSFERASE (OMEGA-AMINO ACID-PYR                | I.F.14               |         |
| RSp1057 | RSO2394 |       |      |       |      |       |      |       |       | TRANSCRIPTION REGULATOR                                                     | VI.A                 |         |
| RSp1058 | RSO2395 |       |      |       |      | -0,48 | 0,00 |       |       | ACETOACETATE DECARBOXYLASE                                                  | I                    |         |
| RSp1059 | RSO2396 |       |      |       |      | -0,44 | 0,00 | 0,97  | 0,04  | OXIDOREDUCTASE DEHYDROGENASE/REDUCTASE                                      | I                    |         |
| RSp1060 | RSO2397 |       |      |       |      |       |      | 0,56  | 0,03  | TRANSMEMBRANE COG1752, Predicted esterase of the alpha-beta hydrolase super | I                    |         |
| RSp1061 | RSO2398 |       |      |       |      |       |      |       |       | OXIDOREDUCTASE COG0673, Predicted dehydrogenases and related proteins       | I                    |         |
| RSp1062 | RSO2469 |       |      |       |      | -1,81 | 0,03 | -0,94 | 0,00  | FERRISDEROPHORE RECEPTOR                                                    | IV.D.5               |         |
| RSp1063 | RSO2470 |       |      | 0,61  | 0,01 | -0,40 | 0,02 |       |       | SIGNAL PEPTIDE                                                              | VI.D                 |         |
| RSp1064 | RSO2472 |       |      |       |      |       |      |       |       | TRANSMEMBRANE                                                               | VI.C                 |         |
| RSp1065 | RSO2471 |       |      |       |      |       |      |       |       | SIGNAL PEPTIDE                                                              | VI.B                 |         |
| RSp1066 | RSO3027 | 0,62  | 0,01 |       |      |       |      |       |       | CONSERVED HYPOTHETICAL PROTEIN                                              | VI.C                 |         |
| RSp1067 | RSO6033 |       |      |       |      |       |      |       |       | CONSERVED HYPOTHETICAL PROTEIN                                              | VI.C                 |         |
| RSp1068 | RSO2476 |       |      |       |      |       |      |       |       | CONSERVED HYPOTHETICAL PROTEIN                                              | VI.C                 |         |
| RSp1069 | RSO2556 |       |      |       |      |       |      | -0,72 | 0,05  | TRANSMEMBRANE                                                               | VI.D                 |         |
| RSp1070 | RSO2559 |       |      | 0,60  | 0,04 |       |      |       |       | TRANSMEMBRANE                                                               | VI.E                 |         |
| RSp1071 | RSO2473 |       |      |       |      |       |      |       |       | HEMAGGLUTININ-RELATED PROTEIN                                               | VI.B                 |         |
| RSp1072 | RSO2541 |       |      |       |      | -0,36 | 0,01 | -1,77 | 0,03  | CONSERVED HYPOTHETICAL PROTEIN                                              | VI.C                 |         |
| RSp1073 | RSO2477 |       |      |       |      |       |      | -0,51 | 0,03  | HEMAGGLUTININ-RELATED PROTEIN                                               | VI.C                 |         |
| RSp1074 | RSO2573 |       |      |       |      |       |      |       |       | HEMOLYSIN ACTIVATING-LIKE PROTEIN                                           | IV.E.2               |         |
| RSp1075 | RSO2577 |       |      | 0,65  | 0,00 |       |      | -0,99 | 0,02  | ACTIVATION/SECRETION PROTEIN                                                | IV.E.2               |         |
| RSp1076 | RSO2580 |       |      |       |      | 0,99  | 0,02 |       |       | OXIDOREDUCTASE GLUCOSE-FRUCTOSE OXIDOREDUCTASE                              | I.F                  |         |
| RSp1077 | RSO2582 |       |      |       |      | -0,78 | 0,00 | -0,58 | 0,01  | TRANSMEMBRANE                                                               | VI.D                 |         |
| RSp1078 | RSO2585 |       |      |       |      | -0,78 | 0,00 |       |       | LIPOPROTEIN                                                                 | VI.B                 |         |
| RSp1079 | RSO2586 |       |      |       |      | -0,22 | 0,03 |       |       | TRANSCRIPTION REGULATOR SIGMA-54 INTERACTING PROTEIN                        | VI.A                 |         |
| RSp1080 | RSO2587 |       |      |       |      |       |      |       |       | TRANSMEMBRANE                                                               | VI.C                 |         |
| RSp1081 | RSO2588 |       |      |       |      |       |      | -0,37 | 0,01  | SIGNAL PEPTIDE                                                              | VI.D                 |         |
| RSp1082 | RSO2589 |       |      |       |      | -0,49 | 0,03 |       |       | TRANSMEMBRANE PILUS ASSEMBLY PROTEIN TADD                                   | III.A.2              |         |
| RSp1083 | RSO2590 |       |      |       |      |       |      |       |       | TRANSMEMBRANE PILUS ASSEMBLY PROTEIN TADC                                   | III.A.2              |         |
| RSp1084 | RSO2591 |       |      |       |      |       |      |       |       | TRANSMEMBRANE PILUS ASSEMBLY PROTEIN TADB                                   | III.A.2              |         |
| RSp1085 | RSO2592 |       |      |       |      | -0,46 | 0,00 |       |       | SECRETION ATPase                                                            | III.A.2              |         |
| RSp1086 | RSO2593 |       |      |       |      |       |      |       |       | PILUS ASSEMBLY PROTEIN                                                      | III.A.2              |         |
| RSp1087 | RSO2594 | 0,41  | 0,05 |       |      | -0,27 | 0,02 |       |       | SIGNAL PEPTIDE PILUS ASSEMBLY PROTEIN, SECRETIN CPAC                        | III.A.2              |         |
| RSp1088 | RSO2597 |       |      |       |      |       |      |       |       | CONSERVED HYPOTHETICAL PROTEIN                                              | VI.C                 |         |
| RSp1089 | RSO2596 |       |      |       |      |       |      |       |       | SIGNAL PEPTIDE COG3745, Flp pilus assembly protein                          | III.A.2              |         |
| RSp1090 | RSO2595 |       |      |       |      |       |      |       |       | TRANSMEMBRANE COG4961, FLP PILUS ASSEMBLY PROTEIN                           | III.A.2              |         |
| RSp1091 | RSO2612 |       |      |       |      |       |      | 0,91  | 0,00  | TRANSMEMBRANE PREPILIN PEPTIDASE                                            | III.A.2              |         |
| RSp1092 | RSO2598 |       |      |       |      |       |      |       |       | PILIN                                                                       | III.A.2              |         |
| RSp1093 | RSO2599 |       |      |       |      |       |      |       |       | TRANSMEMBRANE                                                               | VI.C                 |         |
| RSp1094 | RSO2600 |       |      |       |      | 1,38  | 0,00 |       |       | TRANSMEMBRANE                                                               | VI.C                 |         |
| RSp1095 | RSO2601 |       |      |       |      | -0,53 | 0,00 | 0,90  | 0,00  | SIGNAL PEPTIDE ACTIVATION/SECRETION PROTEIN                                 | IV.E.2               |         |
| RSp1096 | RSO2602 |       |      |       |      | -0,61 | 0,00 | -0,80 | 0,01  | TRANSCRIPTION REGULATOR                                                     | VI.A                 |         |
| RSp1097 | RSO2603 |       |      |       |      | -0,37 | 0,01 | -1,20 | 0,00  | TRANSMEMBRANE SIGNAL TRANSDUCTION PROTEIN EAL - GGDEF DOMAINS               | VI.A                 |         |
| RSp1098 | RSO2604 |       |      |       |      | -0,51 | 0,01 | -1,64 | 0,00  | TRANSCRIPTION REGULATOR HNS-LIKE PROTEIN                                    | VI.A                 |         |
| RSp1099 | RSO2605 |       |      |       |      |       |      | -2,13 | 0,01  | TRANSMEMBRANE METHYL-ACCEPTING CHEMOTAXIS TRANSDUCER                        | IV.C                 |         |
| RSp1100 | RSO2606 |       |      |       |      |       |      |       |       | TRANSMEMBRANE LIPOPROTEIN                                                   | VI.B                 |         |
| RSp1101 | RSO2607 |       |      | 0,35  | 0,01 | -0,44 | 0,00 |       |       | UDP-GLUCOSE 4-EPIMERASE                                                     | I.I.4                |         |
| RSp1102 | RSO2608 |       |      |       |      | -0,68 | 0,00 |       |       | INTEGRASE/RECOMBINASE                                                       | VI.A                 |         |
| RSp1103 | RSO2609 |       |      |       |      |       |      |       |       | HYPOTHETICAL PROTEIN                                                        | VI.D                 |         |
| RSp1104 | RSO2610 |       |      |       |      |       |      | 1,71  | 0,04  | TREHALOSE-PHOSPHATASE                                                       | IV.F.2               |         |
| RSp1105 | RSO2613 |       |      |       |      |       |      |       |       | ALPHA,ALPHA-TREHALOSE-PHOSPHATE SYNTHASE                                    | IV.F.2               |         |
| RSp1106 | RSO2614 |       |      |       |      | -1,64 | 0,00 | -0,53 | 0,04  | TRANSCRIPTION REGULATOR                                                     | VI.A                 |         |
| RSp1107 | RSO2615 | 0,23  | 0,05 |       |      | -1,66 | 0,00 |       |       | ORGANIC HYDROPEROXIDE RESISTANCE PROTEIN                                    | IV.G.4               |         |
| RSp1108 | RSO2616 |       |      |       |      | -1,43 | 0,01 |       |       | SIGNAL PEPTIDE LIPASE                                                       | I.I.1                |         |
| RSp1109 | RSO2617 |       |      |       |      | -0,74 | 0,00 |       |       | CONSERVED HYPOTHETICAL PROTEIN                                              | VI.C                 |         |
| RSp1110 | RSO2618 |       |      |       |      | -0,89 | 0,01 | -0,58 | 0,05  | TRANSCRIPTION REGULATOR                                                     | VI.A                 |         |
| RSp1111 | RSO2619 |       |      |       |      |       |      | -1,02 | 0,00  | LIPASE                                                                      | I.I.1                |         |
| RSp1112 | RSO2620 |       |      |       |      | -2,47 | 0,03 | 0,74  | 0,03  | TRANSMEMBRANE TRANSMEMBRANE MULTIDRUG EFFLUX SYSTEM PROTEIN I               | IV.G.2               |         |



|        |         |       |       |       |       |       |       |       |                                                                                  |                                  |       |
|--------|---------|-------|-------|-------|-------|-------|-------|-------|----------------------------------------------------------------------------------|----------------------------------|-------|
| RSp113 | RS02621 |       |       |       | 1.07  | 0.04  |       |       | TRANSMEMBRANE TRANSMEMBRANE MULTIDRUG-EFFLUX SYSTEM LIPOPRO                      | IV.D                             |       |
| RSp114 | RS05506 | 0.94  | 0.05  |       | 0.88  | 0.02  |       |       | OUTER-MEMBRANE DRUG EFFLUX PROTEIN                                               | IV.D                             |       |
| RSp115 | RS05505 |       |       |       |       |       |       |       | TRANSCRIPTION REGULATOR                                                          | V.IA                             |       |
| RSp116 | RS05504 |       |       |       |       |       |       |       | LOW SPECIFICITY L-THREONINE ALDOLASE                                             | I.I.3                            |       |
| RSp117 | RS05502 |       |       |       |       |       |       |       | TRANSMEMBRANE                                                                    | V.I.D                            |       |
| RSp118 | RS05501 |       |       | -0.40 | 0.05  |       | -1.27 | 0.01  | CONSERVED HYPOTHETICAL PROTEIN                                                   | V.I.C                            |       |
| RSp119 | RS05500 |       |       | -0.54 | 0.04  |       | -0.73 | 0.04  | TRANSCRIPTION REGULATOR                                                          | V.IA                             |       |
| RSp120 | RS05499 |       |       | -0.75 | 0.00  |       |       |       | COG2030, Acyl dehydratase                                                        | I                                |       |
| RSp121 | RS05498 |       |       |       |       |       |       |       | TRANSCRIPTION REGULATOR                                                          | V.IA                             |       |
| RSp122 | RS05497 |       |       |       |       | 0.89  | 0.01  |       | COG2220, Predicted Zn-dependent hydrolases of the beta-lactamase fold            | I.I                              |       |
| RSp123 | RS05496 |       |       |       |       | 3.04  | 0.00  |       | OXIDOREDUCTASE KOG1208, Dehydrogenases with different specificities (related t   | I                                |       |
| RSp124 | RS05494 | -2.66 | 0.00  | -1.14 | 0.00  | 3.95  | 0.00  | 2.61  | OXIDOREDUCTASE NADP-DEPENDENT ZINC-TYPE ALCOHOL DEHYDROGENASE                    | I                                |       |
| RSp125 | RS05495 | -3.26 | 0.00  | -1.25 | 0.00  | 1.86  | 0.00  | 1.96  | HYPOTHETICAL PROTEIN                                                             | V.I.D                            |       |
| RSp126 | RS05493 |       |       | -0.43 | 0.02  |       |       |       | TRANSCRIPTION REGULATOR                                                          | V.IA                             |       |
| RSp127 | RS05492 |       | 0.50  | 0.02  | -0.41 | 0.01  |       |       | ABC TRANSPORTER TRANSMEMBRANE PROTEIN                                            | IV.D                             |       |
| RSp128 | RS05491 |       |       | -0.52 | 0.00  |       |       |       | ARSENATE REDUCTASE (ARSENICAL PUMP MODIFIER)                                     | IV.G                             |       |
| RSp129 | RS05489 | -0.92 | 0.03  | -0.52 | 0.00  | 1.00  | 0.00  | 1.10  | TRANSCRIPTION REGULATOR ARSENICAL RESISTANCE OPERON REPRESSOR                    | IV.G                             |       |
| RSp130 | RS05488 |       |       |       |       |       |       |       | HYPOTHETICAL PROTEIN                                                             | V.I.D                            |       |
| RSp131 | RS05485 |       |       |       |       |       |       |       | HYPOTHETICAL PROTEIN                                                             | V.I.D                            |       |
| RSp132 | RS05487 |       |       |       |       |       |       |       | CONSERVED HYPOTHETICAL PROTEIN                                                   | V.I.C                            |       |
| RSp133 | RS05510 |       |       |       |       |       |       |       | HYPOTHETICAL PROTEIN                                                             | V.I.D                            |       |
| RSp134 | RS05509 |       |       | -0.29 | 0.02  | -0.87 | 0.03  |       | HYPOTHETICAL PROTEIN                                                             | V.I.D                            |       |
| RSp137 | RS05482 |       |       |       |       |       |       |       | TRANSMEMBRANE RHS-RELATED PROTEIN                                                | V.I.C                            |       |
| RSp138 | RS05481 |       | 1.02  | 0.00  | -0.57 | 0.03  |       |       | CONSERVED HYPOTHETICAL PROTEIN                                                   | V.I.C                            |       |
| RSp139 | RS05480 |       | 0.82  | 0.01  |       |       |       |       | VGR-RELATED PROTEIN                                                              | V.I.C                            |       |
| RSp140 | RS05478 |       | 0.61  | 0.05  |       |       | -0.60 | 0.00  | ABC TRANSPORTER SUBSTRATE-BINDING PERIPLASMIC PROTEIN (BBP)                      | IV.D                             |       |
| RSp141 | RS05474 |       |       |       | -1.26 | 0.00  | -0.73 | 0.04  | TRANSCRIPTION REGULATOR                                                          | V.IA                             |       |
| RSp142 | RS05470 |       |       |       | -0.49 | 0.01  |       |       | TRANSCRIPTION REGULATOR                                                          | V.IA                             |       |
| RSp143 | RS05469 |       |       |       | -0.42 | 0.03  |       |       | GLUTAMINASE A                                                                    | I.A.19                           |       |
| RSp144 | RS05467 |       |       |       |       |       | -0.65 | 0.05  | ABC TRANSPORTER COG4149, ABC-type molybdate transport system, permease co        | IV.D                             |       |
| RSp145 | RS05462 |       |       |       | -0.50 | 0.01  |       |       | ABC TRANSPORTER ATP-BINDING PROTEIN                                              | IV.D                             |       |
| RSp146 | RS05458 |       |       |       |       |       |       |       | TRANSCRIPTION REGULATOR                                                          | V.IA                             |       |
| RSp147 | RS05455 |       | 0.78  | 0.01  | -0.30 | 0.01  |       | -2.32 | OXIDOREDUCTASE COG2085, Predicted dinucleotide-binding enzymes                   | I                                |       |
| RSp148 | RS05450 |       |       |       |       |       |       |       | SIGNAL PEPTIDE COG0596, Predicted hydrolases or acyltransferases (alpha/beta hyl | I                                |       |
| RSp150 | RS05437 |       |       |       | 2.41  | 0.00  | 2.62  | 0.04  | HYPOTHETICAL PROTEIN                                                             | V.I.D                            |       |
| RSp151 | RS05436 |       |       |       |       |       |       |       | COG1942, Uncharacterized protein, 4-oxalocrotonate tautomerase homolog           | V.I.C                            |       |
| RSp153 | RS05434 |       |       | -0.21 | 0.05  |       |       |       | TRANSCRIPTION REGULATOR                                                          | V.IA                             |       |
| RSp154 | RS05433 |       |       |       |       |       |       |       | TRANSMEMBRANE                                                                    | V.I.C                            |       |
| RSp155 | RS05432 |       |       |       |       |       |       |       | SIGNAL TRANSDUCTION PROTEIN EAL - GGDEF DOMAINS                                  | V.IA                             |       |
| RSp156 | RS05430 |       |       |       |       |       |       |       | SIGNAL PEPTIDE                                                                   | V.I.D                            |       |
| RSp157 | RS05428 |       | 0.69  | 0.03  |       |       |       |       | TRANSCRIPTION REGULATOR                                                          | V.IA                             |       |
| RSp158 | RS05427 |       |       |       |       |       |       |       | COG3813, Uncharacterized protein conserved in bacteria                           | V.I.C                            |       |
| RSp159 | RS05426 |       |       |       |       |       |       |       | COG0589, Universal stress protein UspA and related nucleotide-binding proteins   | IV.G                             |       |
| RSp160 | RS05425 |       | 0.33  | 0.00  | -0.37 | 0.02  | -0.57 | 0.05  | SIGNAL PEPTIDE COG3678, P pilus assembly/Cpx signaling pathway, periplasmic inl  | V.IA                             |       |
| RSp161 | RS05646 |       |       |       | -0.23 | 0.01  |       |       | TRANSCRIPTION REGULATOR TWO-COMPONENT RESPONSE REGULATOR                         | V.IA                             |       |
| RSp162 | RS05645 |       |       |       |       |       | -0.37 | 0.04  | TRANSCRIPTION REGULATOR TWO-COMPONENT SENSOR HISTIDINE KINASE                    | V.IA                             |       |
| RSp163 | RS05644 |       |       |       | -0.58 | 0.02  | -1.92 | 0.01  | HYPOTHETICAL PROTEIN                                                             | V.I.D                            |       |
| RSp164 | RS05643 |       |       |       | -0.46 | 0.04  |       |       | TRANSCRIPTION REGULATOR                                                          | V.IA                             |       |
| RSp165 | RS05642 |       |       |       | -0.57 | 0.02  |       |       | SIGNAL PEPTIDE                                                                   | V.I.B                            |       |
| RSp166 | RS05641 |       |       |       |       |       |       |       | SIGNAL PEPTIDE COG4727, Uncharacterized protein conserved in bacteria            | V.I.C                            |       |
| RSp167 | RS05823 |       |       |       | 1.08  | 0.00  |       |       | COG2303, BetA, Choline dehydrogenase and related flavoproteins AND KOG2624, T    | I                                |       |
| RSp168 | RS05639 |       |       |       | 0.51  | 0.05  |       |       | TRANSMEMBRANE                                                                    | V.I.C                            |       |
| RSp169 | RS05059 |       |       |       | 0.54  | 0.00  |       |       | CONSERVED HYPOTHETICAL PROTEIN                                                   | V.I.C                            |       |
| RSp170 | RS05060 |       |       |       |       |       | -0.59 | 0.04  | SIGNAL PEPTIDE                                                                   | V.I.C                            |       |
| RSp171 | RS05061 |       |       |       | -0.47 | 0.04  |       |       | TRANSMEMBRANE                                                                    | V.I.C                            |       |
| RSp172 | RS05062 |       |       |       |       |       | -0.44 | 0.04  | TRANSMEMBRANE                                                                    | V.I.C                            |       |
| RSp173 | RS05063 |       |       |       | -0.26 | 0.04  | -0.46 | 0.03  | TRANSMEMBRANE COG1858, Cytochrome c peroxidase                                   | I                                |       |
| RSp174 | RS05064 |       | 0.68  | 0.01  |       |       |       |       | ACID PHOSPHATASE                                                                 | I.F                              |       |
| RSp175 | RS05065 |       |       |       | -0.46 | 0.00  |       |       | CONSERVED HYPOTHETICAL PROTEIN                                                   | V.I.C                            |       |
| RSp176 | RS05066 | 0.04  | 0.04  |       |       |       | 2.45  | 0.01  | HYPOTHETICAL PROTEIN                                                             | V.I.D                            |       |
| RSp177 | RS05067 |       |       |       |       |       |       |       | TRANSMEMBRANE                                                                    | V.I.C                            |       |
| RSp178 | RS05068 |       |       |       | -0.78 | 0.02  |       |       | TRANSCRIPTION REGULATOR COMPOSITE TWO-COMPONENT TRANSCRIPTION                    | V.IA                             |       |
| RSp179 | RS05069 |       |       |       | -0.58 | 0.01  |       | 1.51  | TIS1021-TRANSPOSASE                                                              | V.A                              |       |
| RSp180 | RS05070 |       | 0.91  | 0.03  | -1.47 | 0.00  | 1.85  | 0.00  | HEMAGGLUTININ/HEMOLYSIN-RELATED PROTEIN                                          | V.I.C                            |       |
| RSp181 | RS05071 |       | 1.33  | 0.02  | -1.90 | 0.00  |       |       | TRANSMEMBRANE TYPE I SECRETION SYSTEM OUTER MEMBRANE EFFLUX P                    | IV.E.2                           |       |
| RSp182 | RS05072 |       | 1.76  | 0.04  | -1.24 | 0.00  | -3.02 | 0.04  | ABC TRANSPORTER TYPE I SECRETION SYSTEM, ATP-BINDING TRANSMEMBR                  | IV.E.2                           |       |
| RSp183 | RS05073 |       | 1.31  | 0.01  | -1.47 | 0.00  | -3.58 | 0.00  | TRANSMEMBRANE TYPE I SECRETION SYSTEM PROTEIN                                    | IV.E.2                           |       |
| RSp184 | RS05074 |       |       |       |       |       |       |       | FRUCTOKINASE-LIKE PROTEIN (SUGAR KINASE)                                         | I                                |       |
| RSp185 | RS03129 |       |       |       | -0.53 | 0.00  |       | -0.22 | D-SERINE DEAMINASE (D-SERINE DEHYDRATASE)                                        | I.A.10                           |       |
| RSp186 | RS03130 |       |       |       | -0.86 | 0.00  |       |       | TRANSCRIPTION REGULATOR                                                          | V.IA                             |       |
| RSp187 | RS03131 |       |       |       | -0.48 | 0.01  |       |       | N-ACYL-D-GLUTAMATE DEACYLASE                                                     | I                                |       |
| RSp188 | RS03132 |       | -0.59 | 0.05  | -0.72 | 0.00  |       |       | COG0251, Translation initiation inhibitor                                        | I.B.7                            |       |
| RSp189 | RS03133 |       | -0.21 | 0.04  | -0.26 | 0.01  |       |       | TRANSMEMBRANE HIGH-AFFINITY GLUCONATE TRANSPORTER (GNT-III SYST                  | IV.D.3                           |       |
| RSp190 | RS03134 |       | 0.41  | 0.02  | -0.51 | 0.00  |       |       | BIFUNCTIONAL ALKH PROTEIN (KHG/KDPG ALDOLASE); 4-HYDROXY-2-OXOGL I.F.            | 1.B                              |       |
| RSp191 | RS04751 |       |       |       |       |       |       |       | 3,4-DIHYDROXY-2-BUTANONE 4-PHOSPHATE SYNTHASE                                    | I.B.7                            |       |
| RSp192 | RS03136 |       |       |       |       |       |       |       | TRANSCRIPTION REGULATOR                                                          | V.IA                             |       |
| RSp193 | RS03137 |       | 0.97  | 0.03  |       |       |       |       | TRANSMEMBRANE COG1807, 4-amino-4-deoxy-L-arabinose transferase and related       | I                                |       |
| RSp194 | RS03138 |       |       |       |       |       |       |       | TRANSMEMBRANE                                                                    | V.I.B                            |       |
| RSp195 | RS03139 |       |       |       | -0.39 | 0.02  | -0.80 | 0.03  | TRANSCRIPTION REGULATOR TWO COMPONENT TRANSMEMBRANE SENSOR                       | V.IA                             |       |
| RSp196 | RS03140 |       |       |       | -0.50 | 0.03  |       |       | TRANSCRIPTION REGULATOR TWO COMPONENT RESPONSE REGULATOR                         | V.IA                             |       |
| RSp197 | RS03141 |       |       |       | -0.82 | 0.00  |       |       | MEMBRANE FUSION PROTEIN                                                          | III.B.2                          |       |
| RSp198 | RS03142 |       | 0.73  | 0.03  |       |       |       |       | TRANSMEMBRANE DRUG EFFLUX PUMP                                                   | IV.D                             |       |
| RSp199 | RS03143 |       |       |       |       |       |       |       | TRANSMEMBRANE DRUG EFFLUX PROTEIN                                                | IV.D                             |       |
| RSp200 | RS03144 |       |       |       | -0.92 | 0.02  | 0.92  | 0.04  | TRANSMEMBRANE OUTER MEMBRANE CHANNEL LIPOPROTEIN                                 | IV.D                             |       |
| RSp201 | RS03145 |       |       |       |       |       |       |       | SIGNAL PEPTIDE                                                                   | V.I.C                            |       |
| RSp202 | RS03146 |       |       |       |       |       | 0.91  | 0.02  | TRANSMEMBRANE O-ANTIGEN POLYMERASE                                               | I.B.2                            |       |
| RSp203 | RS03147 |       |       |       |       |       |       |       | SIGNAL TRANSDUCTION PROTEIN GGDEF DOMAIN                                         | V.IA                             |       |
| RSp204 | RS03148 |       |       |       | -0.66 | 0.03  |       |       | HYPOTHETICAL PROTEIN                                                             | V.I.D                            |       |
| RSp205 | RS03149 |       |       |       | -0.33 | 0.02  |       |       | CONSERVED HYPOTHETICAL PROTEIN                                                   | V.I.C                            |       |
| RSp206 | RS03150 |       |       |       |       |       |       |       | OXIDOREDUCTASE TRANSMEMBRANE CYTOCHROME BD-II OXIDASE (SUBUN I.G.1               | I                                |       |
| RSp207 | RS03151 |       |       |       |       |       |       |       | OXIDOREDUCTASE TRANSMEMBRANE CYTOCHROME BD-II OXIDASE (SUBUN I.G.1               | I                                |       |
| RSp208 | RS03152 |       | 0.37  | 0.05  | -0.41 | 0.02  |       |       | SIGNAL TRANSDUCTION PROTEIN EAL - GGDEF DOMAINS                                  | V.IA                             |       |
| RSp209 | RS03153 |       | -0.66 | 0.02  |       |       |       |       | TRANSMEMBRANE METHYL-ACCEPTING CHEMOTAXIS TRANSDUCER PROTEIN                     | V.I.C                            |       |
| RSp210 | RS03154 |       |       |       | -0.58 | 0.03  | -1.81 | 0.00  | TRANSMEMBRANE LIPOPROTEIN                                                        | V.I.C                            |       |
| RSp211 | RS03155 |       | 1.03  | 0.02  |       |       |       |       | TRANSMEMBRANE CARDIOLIPIN SYNTHETASE                                             | I.B.1                            |       |
| RSp212 | RS03156 |       |       |       | -0.43 | 0.02  | 3.92  | 0.01  | HYPOTHETICAL PROTEIN                                                             | V.I.D                            |       |
| RSp213 | RS03157 |       | 0.81  | 0.01  |       |       |       |       | TRANSMEMBRANE COG0534, Na+-driven multidrug efflux pump                          | IV.G                             |       |
| RSp214 | RS03158 |       |       |       | -0.59 | 0.03  | -1.07 | 0.00  | COG3644, Uncharacterized protein conserved in bacteria                           | V.I.C                            |       |
| RSp215 | RS03159 |       |       |       | 0.93  | 0.00  |       |       | PSEUDOGENE (TRUNCATED ANKYRIN REPEAT HARBORING PROTEIN)                          | V.I.B                            |       |
| RSp216 | RS03160 |       |       |       | -0.64 | 0.00  | -0.96 | 0.01  | ISRs014-TRANSPOSASE ORFB                                                         | V.A                              |       |
| RSp218 | RS03162 |       |       |       |       |       | 1.91  | 0.00  | 1.19                                                                             | PSEUDOGENE (N-TERMINAL FRAGMENT) | V.I.D |
| RSp219 | RS03163 |       |       |       |       |       |       |       | OXIDOREDUCTASE NITRATE REDUCTASE LARGE SUBUNIT                                   | I.H.2                            |       |
| RSp220 | RS03164 |       |       |       |       |       |       |       | OXIDOREDUCTASE FLAVOPROTEIN FAD                                                  | I.H.2                            |       |
| RSp221 | RS03165 |       |       |       |       |       |       |       | OXIDOREDUCTASE NITRITE REDUCTASE NADPH (SMALL SUBUNIT)                           | I.H.2                            |       |
| RSp222 | RS03166 |       |       |       |       |       |       |       | OXIDOREDUCTASE NITRITE REDUCTASE NADPH (LARGE SUBUNIT)                           | I.H.2                            |       |
| RSp223 | RS03167 |       |       |       |       |       |       |       | TRANSMEMBRANE HIGH AFFINITY NITRATE TRANSPORTER                                  | I.H.2                            |       |
| RSp224 | RS03168 |       |       |       | -0.41 | 0.02  | -0.76 | 0.05  | TRANSMEMBRANE AEROTAXIS SENSOR RECEPTOR (CHEMOTAXIS TRANSDUC                     | IV.C                             |       |
| RSp225 | RS03169 |       |       |       |       |       |       |       | ISOPENTENYL TRANSFERASE                                                          | I                                |       |
| RSp226 | RS03170 |       |       |       |       |       |       |       | HYPOTHETICAL PROTEIN                                                             | V.I.D                            |       |
| RSp227 | RS03171 |       |       |       | -0.80 | 0.04  |       |       | OXIDOREDUCTASE COG2141, Coenzyme F420-dependent N5,N10-methylene tetra           | I                                |       |
| RSp228 | RS03172 |       |       |       |       |       | 3.51  | 0.02  | SIGNAL PEPTIDE                                                                   | V.I.C                            |       |
| RSp229 | RS03173 |       |       |       | -0.37 | 0.05  |       |       | COG0596, Predicted hydrolases or acyltransferases (alpha/beta hydrolase superfam | I                                |       |



|         |         |       |      |       |      |       |      |       |                                                                            |                                                                |         |       |      |                                                                                |          |
|---------|---------|-------|------|-------|------|-------|------|-------|----------------------------------------------------------------------------|----------------------------------------------------------------|---------|-------|------|--------------------------------------------------------------------------------|----------|
| RSp1349 | RS04778 |       |      |       |      |       |      |       | TRANSCRIPTION REGULATOR                                                    | V.I.A                                                          |         |       |      |                                                                                |          |
| RSp1350 | RS04779 |       |      | -0.39 | 0.02 |       |      |       | COG3832, Uncharacterized conserved protein                                 | V.I.C                                                          |         |       |      |                                                                                |          |
| RSp1351 | RS04780 |       |      | -0.44 | 0.00 |       |      |       | TRANSCRIPTION REGULATOR                                                    | V.I.A                                                          |         |       |      |                                                                                |          |
| RSp1352 | RS04781 |       |      |       |      |       |      |       | TRANSMEMBRANE COG1280, Threonine efflux protein                            | I.V.D.2                                                        |         |       |      |                                                                                |          |
| RSp1353 | RS04783 |       |      | -0.79 | 0.00 | -1.16 | 0.02 | -2.72 | 0.00                                                                       | COG0251, Translation initiation inhibitor                      | I.I.B.7 |       |      |                                                                                |          |
| RSp1354 | RS04818 |       |      | -0.40 | 0.01 | -0.67 | 0.01 | -2.09 | 0.01                                                                       | HYPOTHETICAL PROTEIN                                           | V.I.D   |       |      |                                                                                |          |
| RSp1355 | RS04819 |       |      |       |      |       |      |       | TRANSMEMBRANE LIPOPROTEIN                                                  | V.I.D                                                          |         |       |      |                                                                                |          |
| RSp1356 | RS04820 |       |      |       |      |       |      |       | TRANSMEMBRANE                                                              | V.I.D                                                          |         |       |      |                                                                                |          |
| RSp1357 | RS04822 |       |      | -0.31 | 0.01 |       |      |       | TRANSCRIPTION REGULATOR                                                    | V.I.A                                                          |         |       |      |                                                                                |          |
| RSp1358 | RS04784 | -0.75 | 0.03 |       |      |       |      |       | BRANCHED-CHAIN AMINO ACID AMINOTRANSFERASE                                 | I.A.2                                                          |         |       |      |                                                                                |          |
| RSp1359 | RS04823 |       |      |       |      |       |      |       | TRANSMEMBRANE EFFLUX PUMP ANTIBIOTIC RESISTANCE PROTEIN                    | I.V.D                                                          |         |       |      |                                                                                |          |
| RSp1360 | RS04825 |       |      | -0.45 | 0.01 | -1.07 | 0.00 | -1.37 | 0.00                                                                       | TRANSMEMBRANE                                                  | V.I.D   |       |      |                                                                                |          |
| RSp1361 | RS04826 |       |      |       |      |       |      |       | HYPOTHETICAL PROTEIN                                                       | V.I.B                                                          |         |       |      |                                                                                |          |
| RSp1363 | RS04782 |       |      |       |      |       |      |       | TRANSMEMBRANE METHYL-ACCEPTING CHEMOTAXIS TRANSDUCER                       | I.V.C                                                          |         |       |      |                                                                                |          |
| RSp1365 | RS02094 | -4.71 | 0.02 |       |      |       |      |       | OXIDOREDUCTASE 2-OXOGLUTARATE DEHYDROGENASE E1 DECARBOXYLASE               | I.I.6                                                          |         |       |      |                                                                                |          |
| RSp1365 | RS02093 |       |      | 0.68  | 0.00 | -0.32 | 0.00 |       | TRANSMEMBRANE COG0204, 1-acyl-sn-glycerol-3-phosphate acyltransferase      | I                                                              |         |       |      |                                                                                |          |
| RSp1366 | RS02092 |       |      |       |      | 0.94  | 0.00 | 1.09  | 0.03                                                                       | TRANSMEMBRANE THIAMINE BIOSYNTHESIS PROTEIN APBE               | I.B.8   |       |      |                                                                                |          |
| RSp1367 | RS02091 |       |      |       |      | 0.62  | 0.05 |       | COG3245, Cytochrome c5                                                     | I.G.1                                                          |         |       |      |                                                                                |          |
| RSp1368 | RS02090 |       |      |       |      |       |      |       | OXIDOREDUCTASE NITROUS-OXIDE REDUCTASE                                     | I.F.5                                                          |         |       |      |                                                                                |          |
| RSp1369 | RS02089 |       |      |       |      |       |      |       | TRANSCRIPTION REGULATOR TRANSMEMBRANE REGULATORY PROTEIN NOS1              | I.F.5                                                          |         |       |      |                                                                                |          |
| RSp1370 | RS02088 |       |      |       |      |       |      |       | SIGNAL PEPTIDE PERIPLASMIC COPPER-BINDING PROTEIN NOSD                     | I.F.5                                                          |         |       |      |                                                                                |          |
| RSp1371 | RS02087 |       |      |       |      |       |      |       | ABC TRANSPORTER ABC-TYPE COPPER TRANSPORT SYSTEM, ATPase compo             | I.F.5                                                          |         |       |      |                                                                                |          |
| RSp1372 | RS02086 |       |      |       |      |       |      |       | TRANSMEMBRANE PROTEIN NOSY                                                 | I.F.5                                                          |         |       |      |                                                                                |          |
| RSp1373 | RS02085 |       |      |       |      |       |      | -2.64 | 0.03                                                                       | NOSL LIPOPROTEIN                                               | I.F.5   |       |      |                                                                                |          |
| RSp1374 | RS02084 |       |      |       |      |       |      |       | SKWP PROTEIN 2                                                             | V.I.C                                                          |         |       |      |                                                                                |          |
| RSp1375 | RS02083 |       |      | 1.05  | 0.00 |       |      |       | TRANSMEMBRANE                                                              | V.I.C                                                          |         |       |      |                                                                                |          |
| RSp1376 | RS02082 |       |      |       |      | -0.80 | 0.00 |       | TRANSMEMBRANE COG1296, Predicted branched-chain amino acid permease (azal  | I.V.D                                                          |         |       |      |                                                                                |          |
| RSp1377 | RS02081 |       |      |       |      | -2.23 | 0.00 | -1.94 | 0.03                                                                       | TRANSCRIPTION REGULATOR                                        | V.I.A   |       |      |                                                                                |          |
| RSp1378 | RS02080 |       |      |       |      | -2.33 | 0.00 | -3.58 | 0.00                                                                       | COG2963: Transposase and inactivated derivatives               | V.A     |       |      |                                                                                |          |
| RSp1379 | RS02079 |       |      |       |      |       |      | 0.73  | 0.03                                                                       | SIGNAL PEPTIDE                                                 | V.I.D   |       |      |                                                                                |          |
| RSp1380 | RS02078 |       |      | 0.42  | 0.05 |       |      |       | OXIDOREDUCTASE COG1249, Pyruvate/2-oxoglutarate dehydrogenase complex, dif | I                                                              |         |       |      |                                                                                |          |
| RSp1381 | RS02077 |       |      | 0.54  | 0.04 |       |      |       | PHNA PROTEIN ALKYLPHOSPHONATE UPTAKE                                       | V.I.C                                                          |         |       |      |                                                                                |          |
| RSp1382 | RS02076 |       |      | -0.60 | 0.05 | -0.54 | 0.01 | -1.68 | 0.02                                                                       | SIGNAL PEPTIDE                                                 | V.I.C   |       |      |                                                                                |          |
| RSp1383 | RS02075 |       |      |       |      |       |      |       | ALKANESULFONATES BINDING PROTEIN PRECURSOR                                 | I.F.20                                                         |         |       |      |                                                                                |          |
| RSp1384 | RS02074 |       |      |       |      | 1.09  | 0.02 | 2.45  | 0.03                                                                       | TRANSMEMBRANE                                                  | V.I.D   |       |      |                                                                                |          |
| RSp1385 | RS02073 |       |      |       |      |       |      |       | TRANSMEMBRANE                                                              | V.I.C                                                          |         |       |      |                                                                                |          |
| RSp1386 | RS02072 |       |      | -2.39 | 0.00 | 2.47  | 0.00 | 0.95  | 0.01                                                                       | LIPOPROTEIN                                                    | V.I.C   |       |      |                                                                                |          |
| RSp1387 | RS02071 |       |      |       |      |       |      |       | TRANSCRIPTION REGULATOR                                                    | V.I.A                                                          |         |       |      |                                                                                |          |
| RSp1388 | RS02070 |       |      | -1.65 | 0.04 | 1.90  | 0.00 | -3.77 | 0.00                                                                       | HYPOTHETICAL PROTEIN                                           | V.I.D   |       |      |                                                                                |          |
| RSp1389 | RS02069 |       |      |       |      | 0.45  | 0.02 |       | COG2220, PREDICTED ZINC-DEPENDENT HYDROLASE                                | I.I                                                            |         |       |      |                                                                                |          |
| RSp1390 | RS02068 |       |      |       |      |       |      |       | TRANSCRIPTION REGULATOR RNA POLYMERASE SIGMA FACTOR FOR FLAGE              | I.V.C                                                          |         |       |      |                                                                                |          |
| RSp1391 | RS02067 |       |      |       |      | 2.61  | 0.00 |       | FLAGELLAR SYNTHESIS REGULATOR FieN                                         | I.V.C                                                          |         |       |      |                                                                                |          |
| RSp1392 | RS02066 |       |      |       |      |       |      |       | FLAGELLAR BIOSYNTHETIC PROTEIN FLHF                                        | I.V.C                                                          |         |       |      |                                                                                |          |
| RSp1393 | RS02065 |       |      |       |      |       |      |       | TRANSMEMBRANE FLAGELLAR BIOSYNTHESIS PROTEIN FLHA                          | I.V.C                                                          |         |       |      |                                                                                |          |
| RSp1394 | RS02064 |       |      |       |      |       |      |       | TRANSMEMBRANE FLAGELLAR BIOSYNTHETIC PROTEIN FLHB                          | I.V.C                                                          |         |       |      |                                                                                |          |
| RSp1395 | RS02063 |       |      |       |      |       |      | 0.71  | 0.02                                                                       | TRANSCRIPTION REGULATOR TRANSCRIPTION REGULATOR                | V.I.A   |       |      |                                                                                |          |
| RSp1396 | RS02062 |       |      |       |      |       |      |       | TRANSMEMBRANE TRANSPORTER                                                  | I.V.D                                                          |         |       |      |                                                                                |          |
| RSp1397 | RS02061 |       |      |       |      |       |      |       | 3-DEHYDROQUINATE DEHYDRATASE (3-DEHYDROQUINASE) (TYPE II DHQASE)           | I.A.5                                                          |         |       |      |                                                                                |          |
| RSp1398 | RS02060 |       |      |       |      |       |      |       | OXIDOREDUCTASE SHIKIMATE 5-DEHYDROGENASE                                   | I.A.5                                                          |         |       |      |                                                                                |          |
| RSp1399 | RS02059 |       |      |       |      |       |      | 0.62  | 0.02                                                                       | SIGNAL PEPTIDE PORIN                                           | I.V.D   |       |      |                                                                                |          |
| RSp1400 | RS02058 |       |      |       |      | -0.86 | 0.01 |       | COG3185, 4-hydroxyphenylpyruvate dioxygenase AND COG1082, Sugar phosphate  | I.I                                                            |         |       |      |                                                                                |          |
| RSp1401 | RS02057 |       |      |       |      | -1.24 | 0.01 |       | CHEMOTAXIS PROTEIN CHEZ                                                    | I.V.C                                                          |         |       |      |                                                                                |          |
| RSp1402 | RS02056 |       |      |       |      | -0.74 | 0.02 | -0.79 | 0.02                                                                       | TRANSCRIPTION REGULATOR CHEMOTAXIS RESPONSE REGULATOR PROTEI   | I.V.C   |       |      |                                                                                |          |
| RSp1403 | RS02055 |       |      |       |      |       |      |       | PROTEIN-GLUTAMATE METHYLESTERASE                                           | I.V.C                                                          |         |       |      |                                                                                |          |
| RSp1404 | RS02054 |       |      |       |      |       |      |       | CHEMOTAXIS PROTEIN                                                         | I.V.C                                                          |         |       |      |                                                                                |          |
| RSp1405 | RS02053 |       |      |       |      | -0.60 | 0.02 |       | CHEMOTAXIS PROTEIN METHYLTRANSFERASE                                       | I.V.C                                                          |         |       |      |                                                                                |          |
| RSp1406 | RS02052 |       |      |       |      |       |      | -1.08 | 0.02                                                                       | TRANSMEMBRANE METHYL-ACCEPTING CHEMOTAXIS PROTEIN I (SERINE CH | I.V.C   |       |      |                                                                                |          |
| RSp1407 | RS02051 |       |      |       |      |       |      |       | CHEMOTAXIS PROTEIN CHEW                                                    | I.V.C                                                          |         |       |      |                                                                                |          |
| RSp1408 | RS05777 |       |      |       |      |       |      |       | TRANSCRIPTION REGULATOR CHEMOTAXIS SENSOR HISTIDINE KINASE PROT            | I.V.C                                                          |         |       |      |                                                                                |          |
| RSp1409 | RS05776 |       |      |       |      | -0.64 | 0.00 |       | TRANSCRIPTION REGULATOR CHEMOTAXIS RESPONSE REGULATOR PROTEI               | I.V.C                                                          |         |       |      |                                                                                |          |
| RSp1410 | RS05775 |       |      |       |      |       |      |       | TRANSMEMBRANE CHEMOTAXIS PROTEIN (MOTILITY PROTEIN B)                      | I.V.C                                                          |         |       |      |                                                                                |          |
| RSp1411 | RS05774 |       |      |       |      | -0.91 | 0.00 | -0.95 | 0.02                                                                       | TRANSMEMBRANE CHEMOTAXIS PROTEIN (MOTILITY PROTEIN A)          | I.V.C   |       |      |                                                                                |          |
| RSp1412 | RS05773 |       |      |       |      | -0.94 | 0.00 |       | TRANSCRIPTION REGULATOR FLAGELLAR TRANSCRIPTIONAL ACTIVATOR                | I.V.C                                                          |         |       |      |                                                                                |          |
| RSp1413 | RS03127 |       |      |       |      | -1.29 | 0.01 | -2.23 | 0.04                                                                       | TRANSCRIPTION REGULATOR FLAGELLAR TRANSCRIPTIONAL ACTIVATOR    | I.V.C   |       |      |                                                                                |          |
| RSp1414 | RS05841 |       |      |       |      | -0.38 | 0.05 |       | HYPOTHETICAL PROTEIN                                                       | V.I.D                                                          |         |       |      |                                                                                |          |
| RSp1415 | RS03126 |       |      |       |      |       |      |       | HYPOTHETICAL PROTEIN                                                       | V.I.D                                                          |         |       |      |                                                                                |          |
| RSp1416 | RS03125 |       |      |       |      |       |      |       | TRANSMEMBRANE                                                              | V.I.B                                                          |         |       |      |                                                                                |          |
| RSp1417 | RS03124 |       |      | -1.10 | 0.00 | 1.10  | 0.02 | -0.38 | 0.04                                                                       | 0.95                                                           | 0.02    | 2.21  | 0.00 | TRANSMEMBRANE TRANSMEMBRANE EFFLUX PROTEIN                                     | I.V.D    |
| RSp1418 | RS03123 |       |      | -3.43 | 0.00 | 1.05  | 0.00 |       |                                                                            | 3.13                                                           | 0.00    | 3.02  | 0.00 | HYDROLASE                                                                      | I.I      |
| RSp1419 | RS03122 |       |      | -3.09 | 0.00 | 1.23  | 0.00 | -0.22 | 0.01                                                                       | 2.48                                                           | 0.00    | 2.80  | 0.00 | PEPTIDE SYNTHASE                                                               | I.I.B.7  |
| RSp1420 | RS06015 |       |      |       |      |       |      |       |                                                                            |                                                                |         |       |      | HYPOTHETICAL PROTEIN                                                           | V.I.D    |
| RSp1421 | RS03121 |       |      |       |      | -0.67 | 0.00 |       |                                                                            |                                                                |         | 1.86  | 0.00 | COG1804, Predicted acyl-CoA transferases/carnitine dehydratase                 | I        |
| RSp1422 | RS03120 |       |      |       |      |       |      |       |                                                                            |                                                                |         |       |      | PEPTIDE SYNTHETASE                                                             | I.I.B.7  |
| RSp1423 | RS03119 |       |      |       |      |       |      |       |                                                                            |                                                                |         |       |      | OXIDOREDUCTASE COG0644, Dehydrogenases (flavoproteins)                         | I        |
| RSp1424 | RS03118 |       |      |       |      | 0.79  | 0.01 |       |                                                                            |                                                                |         |       |      | DIAMINOBUTYRATE-PYRUVATE AMINOTRANSFERASE                                      | I.V.F.2  |
| RSp1425 | RS03117 |       |      |       |      | 0.58  | 0.02 |       |                                                                            |                                                                |         | 1.77  | 0.00 | OXIDOREDUCTASE L-ORNITHINE 5-MONOXYGENASE                                      | I.V.D.5  |
| RSp1426 | RS03116 |       |      |       |      | 0.66  | 0.00 |       |                                                                            |                                                                |         | 1.44  | 0.00 | HYPOTHETICAL PROTEIN                                                           | V.I.D    |
| RSp1427 | RS03115 |       |      |       |      |       |      | 0.43  | 0.01                                                                       |                                                                |         |       |      | SIGNAL PEPTIDE                                                                 | V.I.D    |
| RSp1428 | RS03114 |       |      |       |      | 0.89  | 0.00 |       |                                                                            |                                                                |         | 2.98  | 0.02 | COG0607, Rhodanese-related sulfurtransferase                                   | I        |
| RSp1429 | RS03113 |       |      |       |      | 0.48  | 0.04 |       |                                                                            |                                                                |         |       |      | COG0657, Esterase/lipase                                                       | I        |
| RSp1430 | RS03112 |       |      |       |      | 0.65  | 0.01 |       |                                                                            |                                                                |         |       |      | CONSERVED HYPOTHETICAL PROTEIN                                                 | V.I.C    |
| RSp1431 | RS03111 |       |      |       |      |       |      |       |                                                                            |                                                                |         |       |      | OXIDOREDUCTASE COG0665, Glycine/D-amino acid oxidases (deaminating)            | I        |
| RSp1432 | RS03110 |       |      |       |      | 1.04  | 0.00 |       |                                                                            |                                                                |         |       |      | COG2140, Thermophilic glucose-6-phosphate isomerase and related metalloenzymes | I        |
| RSp1433 | RS03109 |       |      |       |      | 0.67  | 0.02 | -0.38 | 0.04                                                                       |                                                                |         |       |      | HYPOTHETICAL PROTEIN                                                           | V.I.D    |
| RSp1434 | RS03108 |       |      |       |      |       |      | -0.24 | 0.03                                                                       |                                                                |         |       |      | COG0318, Acyl-CoA synthetases (AMP-forming) / AMP-acid ligases II              | I        |
| RSp1435 | RS03107 |       |      |       |      | 0.58  | 0.04 |       |                                                                            |                                                                |         |       |      | TRANSMEMBRANE COG0596, Predicted hydrolases or acyltransferases (alpha/beta    | I        |
| RSp1436 | RS03106 |       |      |       |      |       |      |       |                                                                            |                                                                |         |       |      | Acetyltransferase                                                              | I        |
| RSp1437 | RS03105 |       |      |       |      | 0.60  | 0.05 |       |                                                                            |                                                                |         | 1.78  | 0.00 | HYPOTHETICAL PROTEIN                                                           | V.I.B    |
| RSp1438 | RS03104 |       |      |       |      | -0.82 | 0.01 |       |                                                                            |                                                                |         | 0.96  | 0.01 | TRNA SYNTHETASE                                                                | I.I.D.1  |
| RSp1439 | RS03103 |       |      |       |      |       |      |       |                                                                            |                                                                |         |       |      | SERINE ACETYLTRANSFERASE                                                       | I.A.9    |
| RSp1440 | RS06034 |       |      |       |      | 2.84  | 0.00 |       |                                                                            |                                                                |         |       |      | HYPOTHETICAL PROTEIN                                                           | V.I.D    |
| RSp1441 | RS03102 |       |      |       |      |       |      |       |                                                                            |                                                                |         | -1.01 | 0.03 | TRANSCRIPTION REGULATOR TWO-COMPONENT SENSOR KINASE                            | V.I.A    |
| RSp1442 | RS03101 |       |      |       |      |       |      |       |                                                                            |                                                                |         | 0.47  | 0.01 | TRANSCRIPTION REGULATOR TWO-COMPONENT RESPONSE REGULATOR                       | V.I.A    |
| RSp1443 | RS03100 |       |      |       |      |       |      |       |                                                                            |                                                                |         |       |      | SIGNAL PEPTIDE                                                                 | V.I.B    |
| RSp1444 | RS03099 |       |      |       |      |       |      | -0.48 | 0.05                                                                       |                                                                |         |       |      | HEMAGGLUTININ-RELATED PROTEIN                                                  | V.I.C    |
| RSp1445 | RS03098 |       |      |       |      |       |      |       |                                                                            |                                                                |         | -0.95 | 0.01 | SIGNAL PEPTIDE ACTIVATION/SECRETION PROTEIN                                    | I.V.E.2  |
| RSp1446 | RS03097 |       |      |       |      |       |      |       |                                                                            |                                                                |         |       |      | CYCLOPROPANE-FATTY-ACYL-PHOSPHOLIPID SYNTHASE                                  | I.C      |
| RSp1447 | RS03096 |       |      |       |      |       |      |       |                                                                            |                                                                |         | 1.10  | 0.01 | ABC TRANSPORTER ABC-type branched-chain amino acid transport systems, peripl   | I.V.D.2  |
| RSp1448 | RS03095 |       |      |       |      |       |      |       |                                                                            |                                                                |         |       |      | PYRUVATE KINASE II                                                             | I.H.8    |
| RSp1449 | RS03094 |       |      |       |      |       |      |       |                                                                            |                                                                |         |       |      | OXIDOREDUCTASE HYDROXYPYRUVATE REDUCTASE                                       | I.I.4    |
| RSp1450 | RS03093 |       |      |       |      |       |      |       |                                                                            |                                                                |         | -0.80 | 0.01 | TRANSCRIPTION REGULATOR                                                        | V.I.A    |
| RSp1451 | RS03092 |       |      |       |      |       |      |       |                                                                            |                                                                |         | -1.06 | 0.05 | HYPOTHETICAL PROTEIN                                                           | V.I.D    |
| RSp1452 | RS03091 |       |      |       |      |       |      |       |                                                                            |                                                                |         | -0.66 | 0.01 | HYPOTHETICAL PROTEIN                                                           | V.I.D    |
| RSp1453 | RS03090 |       |      |       |      |       |      | -0.50 | 0.01                                                                       |                                                                |         |       |      | SIGNAL PEPTIDE COG3258, CYTOCHROME C                                           | I.H      |
| RSp1454 | RS03089 |       |      |       |      |       |      | -0.71 | 0.04                                                                       |                                                                |         |       |      | TRANSCRIPTION REGULATOR TWO-COMPONENT TRANSMEMBRANE SENSOR                     | V.I.A    |
| RSp1455 | RS03088 |       |      |       |      |       |      |       |                                                                            |                                                                |         |       |      | TRANSCRIPTION REGULATOR TWO-COMPONENT RESPONSE REGULATOR                       | V.I.A    |
| RSp1456 | RS05806 |       |      |       |      |       |      |       |                                                                            |                                                                |         |       |      | OUTER MEMBRANE LIPOPROTEIN                                                     | I.II.B.2 |
| RSp1457 | RS03087 |       |      |       |      |       |      |       |                                                                            |                                                                |         |       |      | SIGNAL PEPTIDE CATION-EFFLUX SYSTEM PROTEIN                                    | I.V.D.4  |
| RSp1458 | RS03086 |       |      |       |      |       |      |       |                                                                            |                                                                |         |       |      | TRANSMEMBRANE TRANSPORTER PROTEIN                                              | I.V.D    |
| RSp1459 | RS03085 |       |      |       |      | 0.46  | 0.00 |       |                                                                            |                                                                |         |       |      | SIGNAL PEPTIDE COG1574, Predicted metal-dependent hydrolase with the TIM-barr  | I.I      |
| RSp1460 | RS03084 |       |      |       |      |       |      | -2.71 | 0.01                                                                       | 4.14                                                           | 0.03    | 4.03  | 0.03 | HYPOTHETICAL PROTEIN                                                           | V.I.B    |
| RSp1461 | RS03083 |       |      |       |      | -3.58 | 0.00 | -3.74 | 0.00                                                                       | 5.07                                                           | 0.03    | 3.21  | 0.00 | SIGNAL PEPTIDE                                                                 | V.I.C    |

|         |         |       |      |       |      |       |      |       |      |                                                                                |         |
|---------|---------|-------|------|-------|------|-------|------|-------|------|--------------------------------------------------------------------------------|---------|
| RSp1462 | RS03082 | -1.66 | 0.00 | 2.30  | 0.00 | 2.78  | 0.00 | 3.96  | 0.00 | Outer membrane efflux protein                                                  | IV.D    |
| RSp1463 | RS03081 | -2.06 | 0.00 | 2.88  | 0.00 | 3.82  | 0.00 | 3.88  | 0.00 | ABC TRANSPORTER HlyD family secretion protein                                  | IV.D    |
| RSp1464 | RS03080 | -0.89 | 0.00 | 1.52  | 0.01 | 3.76  | 0.01 | 3.23  | 0.00 | ABC TRANSPORTER ABC-type transport system, ATPase component                    | IV.D    |
| RSp1465 | RS03079 |       |      |       |      | 1.41  | 0.02 |       |      | ABC TRANSPORTER ABC-type transport system, permease component                  | IV.D    |
| RSp1466 | RS03078 | -4.91 | 0.00 | 5.32  | 0.00 | 4.29  | 0.00 | 4.56  | 0.00 | SIGNAL PEPTIDE                                                                 | V.I.C   |
| RSp1467 | RS03077 | -4.32 | 0.00 | 5.05  | 0.00 | 4.81  | 0.00 | 2.99  | 0.00 | SIGNAL PEPTIDE                                                                 | V.I.C   |
| RSp1468 | RS03076 |       |      |       |      |       |      |       |      | SIGNAL PEPTIDE COG4313, Protein involved in meta-pathway of phenol degradation | IV.F.1  |
| RSp1469 | RS03075 |       |      |       |      |       |      |       |      | TYROSINE PHOSPHATASE                                                           | V.I.B   |
| RSp1470 | RS03074 |       |      | -0.41 | 0.05 |       |      |       |      | TRANSCRIPTION REGULATOR                                                        | V.I.A   |
| RSp1471 | RS03073 |       |      | -0.54 | 0.01 |       |      |       |      | TRANSCRIPTION REGULATOR                                                        | V.I.A   |
| RSp1472 | RS03072 | 1.26  | 0.01 | -0.46 | 0.01 |       |      |       |      | 4-CARBOXYMUCONOLACTONE DECARBOXYLASE                                           | I       |
| RSp1473 | RS03071 |       |      | -0.37 | 0.03 |       |      |       |      | OXIDOREDUCTASE COG0667, Oxidoreductase (related to aryl-alcohol dehydrogenase) | V.I.B   |
| RSp1474 | RS06014 | -4.48 | 0.00 | 3.88  | 0.00 | 3.42  | 0.00 |       |      | HYPOTHETICAL PROTEIN                                                           | V.I.B   |
| RSp1475 | RS03068 | -3.83 | 0.00 | 5.09  | 0.00 | 3.03  | 0.00 |       |      | CONSERVED HYPOTHETICAL PROTEIN                                                 | V.I.C   |
| RSp1476 | RS03067 |       |      |       |      |       |      |       |      | CONSERVED HYPOTHETICAL PROTEIN                                                 | V.I.C   |
| RSp1477 | RS03066 |       |      |       |      |       |      |       |      | SIGNAL PEPTIDE                                                                 | V.I.D   |
| RSp1478 | RS03065 | 0.95  | 0.01 |       |      |       |      |       |      | TRANSCRIPTION REGULATOR                                                        | V.I.A   |
| RSp1479 | RS03064 |       |      | -0.29 | 0.00 | -0.57 | 0.05 |       |      | CONSERVED HYPOTHETICAL PROTEIN                                                 | V.I.C   |
| RSp1480 | RS03063 |       |      | -0.30 | 0.04 |       |      |       |      | CONSERVED HYPOTHETICAL PROTEIN                                                 | V.I.C   |
| RSp1481 | RS03062 | 1.77  | 0.00 | -0.30 | 0.04 |       |      |       |      | CONSERVED HYPOTHETICAL PROTEIN                                                 | V.I.C   |
| RSp1482 | RS03061 | 0.96  | 0.01 | 0.52  | 0.03 |       |      |       |      | TRANSMEMBRANE                                                                  | V.I.C   |
| RSp1483 | RS03060 | 1.69  | 0.02 |       |      |       |      |       |      | TRANSMEMBRANE COG2885, Outer membrane protein                                  | V.I.C   |
| RSp1484 | RS03059 | 1.26  | 0.00 |       |      |       |      |       |      | CONSERVED HYPOTHETICAL PROTEIN                                                 | V.I.C   |
| RSp1485 | RS03058 | 1.13  | 0.00 |       |      |       |      |       |      | OXIDOREDUCTASE COG0596, Hydrolase or acyltransferase (alpha/beta hydrolase s   | V.I.C   |
| RSp1486 | RS03057 | 1.13  | 0.00 |       |      |       |      |       |      | TRANSMEMBRANE                                                                  | V.I.C   |
| RSp1487 | RS03056 | 1.44  | 0.00 |       |      |       |      |       |      | COG0439, Biotin carboxylase                                                    | I       |
| RSp1488 | RS03055 | 0.73  | 0.01 |       |      |       |      | 1.26  | 0.02 | 3'-HYDROXYMETHYLCEPHEM-O-CARBAMOYLTRANSFERASE                                  | II.B    |
| RSp1489 | RS03054 | 1.24  | 0.00 |       |      | -1.98 | 0.02 |       |      | HYPOTHETICAL PROTEIN                                                           | V.I.D   |
| RSp1490 | RS03053 | 0.69  | 0.01 |       |      |       |      | 1.10  | 0.00 | CONSERVED HYPOTHETICAL PROTEIN                                                 | V.I.C   |
| RSp1491 | RS03052 | 1.02  | 0.00 |       |      |       |      |       |      | TRANSMEMBRANE                                                                  | V.I.D   |
| RSp1492 | RS03051 | 0.92  | 0.00 |       |      | 0.33  | 0.00 |       |      | COG2192, Carbamoyl transferase                                                 | I       |
| RSp1493 | RS05842 | -1.23 | 0.02 | 0.62  | 0.01 | -0.78 | 0.05 |       |      | HYPOTHETICAL PROTEIN                                                           | V.I.B   |
| RSp1494 | RS03050 |       |      | -0.35 | 0.01 |       |      |       |      | HYPOTHETICAL PROTEIN                                                           | V.I.D   |
| RSp1495 | RS03046 | 0.39  | 0.01 | -0.25 | 0.02 |       |      |       |      | COG0431, Flavoprotein                                                          | V.I.C   |
| RSp1496 | RS03045 |       |      |       |      |       |      |       |      | TRANSMEMBRANE CATION-EFFLUX SYSTEM PROTEIN                                     | IV.D.4  |
| RSp1497 | RS03044 |       |      |       |      |       |      |       |      | SIGNAL PEPTIDE LIPOPROTEIN                                                     | V.I.C   |
| RSp1498 | RS03043 |       |      |       |      |       |      |       |      | SIGNAL PEPTIDE OUTER MEMBRANE USHER PROTEIN                                    | III.B.2 |
| RSp1499 | RS03042 |       |      |       |      |       |      |       |      | TRANSMEMBRANE PILI ASSEMBLY CHAPERONE                                          | IV.B    |
| RSp1500 | RS03041 |       |      |       |      | -1.25 | 0.05 |       |      | SIGNAL PEPTIDE                                                                 | V.I.C   |
| RSp1501 | RS03040 | -0.99 | 0.01 |       |      |       |      |       |      | SIGNAL PEPTIDE                                                                 | V.I.C   |
| RSp1502 | RS03039 |       |      |       |      |       |      |       |      | SIGNAL PEPTIDE                                                                 | V.I.C   |
| RSp1503 | RS03038 |       |      |       |      |       |      |       |      | TRANSMEMBRANE MAJOR ANAEROBICALLY INDUCED OUTER MEMBRANE PROTEIN               | II.H.2  |
| RSp1504 | RS03037 |       |      |       |      |       |      |       |      | CONSERVED HYPOTHETICAL PROTEIN                                                 | V.I.C   |
| RSp1505 | RS03036 |       |      |       |      |       |      |       |      | TRANSMEMBRANE NITRIC OXIDE REDUCTASE (SUBUNIT B)                               | I.H.2   |
| RSp1506 | RS03035 |       |      |       |      |       |      |       |      | TRANSCRIPTION REGULATOR                                                        | V.I.A   |
| RSp1507 | RS03034 |       |      |       |      |       |      |       |      | ABC TRANSPORTER ATP-BINDING PROTEIN                                            | IV.D    |
| RSp1508 | RS03033 | -0.48 | 0.05 | 0.93  | 0.00 |       |      |       |      | ABC TRANSPORTER TRANSMEMBRANE PROTEIN                                          | IV.D    |
| RSp1509 | RS03032 |       |      | -0.30 | 0.04 |       |      |       |      | TRANSMEMBRANE PERIPLASMIC SUBSTRATE-BINDING PROTEIN                            | IV.D    |
| RSp1510 | RS03031 | 0.48  | 0.01 | -0.62 | 0.00 | 0.86  | 0.01 | 1.27  | 0.02 | CONSERVED HYPOTHETICAL PROTEIN                                                 | V.I.C   |
| RSp1511 | RS04788 |       |      |       |      |       |      | 1.19  | 0.05 | CONSERVED HYPOTHETICAL PROTEIN                                                 | V.I.C   |
| RSp1512 | RS04789 |       |      |       |      |       |      |       |      | TRANSCRIPTION REGULATOR                                                        | V.I.A   |
| RSp1513 | RS04790 |       |      |       |      |       |      |       |      | TRANSMEMBRANE COG4125, Predicted membrane protein                              | V.I.C   |
| RSp1514 | RS04791 |       |      |       |      | -0.68 | 0.03 |       |      | TRANSCRIPTION REGULATOR                                                        | V.I.A   |
| RSp1515 | RS04792 |       |      |       |      | -1.31 | 0.01 |       |      | COG0251, TdcF, Putative translation initiation inhibitor                       | II.B.7  |
| RSp1516 | RS04793 |       |      |       |      |       |      |       |      | AMINO-ACID DEHYDRATASE                                                         | I.I.3   |
| RSp1517 | RS04794 |       |      |       |      |       |      |       |      | COG2964: Uncharacterized protein conserved in bacteria                         | V.I.C   |
| RSp1518 | RS04795 |       |      | -1.06 | 0.00 | 1.08  | 0.00 | 1.44  | 0.00 | SIGNAL PEPTIDE                                                                 | V.I.C   |
| RSp1519 | RS04796 |       |      | -0.45 | 0.01 |       |      |       |      | TRANSMEMBRANE SULFATE TRANSPORTER                                              | IV.D    |
| RSp1520 | RS04797 |       |      |       |      |       |      |       |      | CONSERVED HYPOTHETICAL PROTEIN                                                 | V.I.C   |
| RSp1521 | RS04798 | 0.38  | 0.01 | -0.35 | 0.03 |       |      |       |      | COG3946, Type IV secretory pathway VirJ component - related protein            | V.I.C   |
| RSp1522 | RS04799 |       |      | -0.44 | 0.00 |       |      |       |      | TRANSMEMBRANE                                                                  | V.I.C   |
| RSp1523 | RS04800 |       |      | -0.77 | 0.00 | -1.48 | 0.05 | -0.48 | 0.00 | CONSERVED HYPOTHETICAL PROTEIN                                                 | V.I.C   |
| RSp1524 | RS04801 |       |      |       |      |       |      |       |      | TRANSMEMBRANE SIGNAL TRANSDUCTION PROTEIN GGDEF DOMAIN                         | V.I.A   |
| RSp1525 | RS04802 | 0.66  | 0.05 |       |      |       |      |       |      | TRANSMEMBRANE COG0705, Uncharacterized membrane protein                        | V.I.C   |
| RSp1526 | RS04803 | 0.38  | 0.02 | 0.35  | 0.01 | 1.02  | 0.01 | 1.60  | 0.00 | HYPOTHETICAL PROTEIN                                                           | V.I.B   |
| RSp1527 | RS04804 |       |      | 0.39  | 0.00 |       |      |       |      | SIGNAL PEPTIDE                                                                 | V.I.C   |
| RSp1528 | RS04805 |       |      |       |      |       |      |       |      | HYPOTHETICAL PROTEIN                                                           | V.I.B   |
| RSp1529 | RS04806 | -1.23 | 0.01 |       |      |       |      | 4.00  | 0.00 | OXIDOREDUCTASE 1-AMINOCYCLOPROPANE-1-CARBOXYLATE OXIDASE (ACC)                 | I.F     |
| RSp1530 | RS04807 |       |      | -0.72 | 0.00 |       |      |       |      | OXIDOREDUCTASE L-ASCORBATE OXIDASE (ASCORBASE)                                 | I.F     |
| RSp1531 | RS06038 |       |      |       |      |       |      |       |      | SIGNAL PEPTIDE HYPOTHETICAL PROTEIN                                            | V.I.D   |
| RSp1532 | RS04809 |       |      | -0.40 | 0.00 | -0.23 | 0.01 | -0.50 | 0.00 | LIPOPROTEIN                                                                    | V.I.C   |
| RSp1533 | RS04810 |       |      | -0.38 | 0.05 |       |      |       |      | LIPOPROTEIN                                                                    | V.I.D   |
| RSp1534 | RS04811 |       |      | -0.47 | 0.01 |       |      | -0.88 | 0.02 | SIGNAL PEPTIDE COG0760, Peptidyl-prolyl isomerase                              | II.B.7  |
| RSp1535 | RS04812 |       |      | 0.39  | 0.00 |       |      | -1.47 | 0.00 | SIGNAL PEPTIDE ACTIVATION/SECRETION PROTEIN                                    | IV.E.2  |
| RSp1536 | RS04813 | -1.21 | 0.02 | -3.06 | 0.00 | 2.34  | 0.00 | 3.89  | 0.00 | SIGNAL PEPTIDE HEMAGGLUTININ-RELATED PROTEIN                                   | V.I.C   |
| RSp1537 | RS04814 |       |      |       |      |       |      |       |      | TRANSMEMBRANE                                                                  | V.I.C   |
| RSp1538 | RS06035 |       |      |       |      |       |      |       |      | LIPOPROTEIN                                                                    | V.I.D   |
| RSp1539 | RS05770 |       |      | -0.53 | 0.02 |       |      |       |      | HEMAGGLUTININ-RELATED PROTEIN                                                  | V.I.C   |
| RSp1540 | RS02096 |       |      |       |      |       |      |       |      | CONSERVED HYPOTHETICAL PROTEIN                                                 | V.I.C   |
| RSp1541 | RS02097 |       |      |       |      | -1.15 | 0.02 | 1.23  | 0.02 | HYPOTHETICAL PROTEIN                                                           | V.I.D   |
| RSp1542 | RS02098 |       |      | -0.39 | 0.02 |       |      |       |      | HYPOTHETICAL PROTEIN                                                           | V.I.D   |
| RSp1543 | RS02099 |       |      |       |      |       |      |       |      | CONSERVED HYPOTHETICAL PROTEIN                                                 | V.I.C   |
| RSp1544 | RS02100 |       |      |       |      | -1.80 | 0.01 |       |      | HYPOTHETICAL PROTEIN                                                           | V.I.D   |
| RSp1545 | RS02101 |       |      |       |      |       |      |       |      | HEMAGGLUTININ-RELATED PROTEIN                                                  | V.I.B   |
| RSp1546 | RS02102 |       |      | -0.64 | 0.00 |       |      |       |      | CONSERVED HYPOTHETICAL PROTEIN                                                 | V.I.C   |
| RSp1547 | RS02103 |       |      |       |      | 0.61  | 0.02 |       |      | CONSERVED HYPOTHETICAL PROTEIN                                                 | V.I.C   |
| RSp1548 | RS02104 |       |      |       |      | -1.29 | 0.03 |       |      | HYPOTHETICAL PROTEIN                                                           | V.I.D   |
| RSp1549 | RS02105 | -0.49 | 0.02 | -0.47 | 0.04 | -1.11 | 0.00 | -2.31 | 0.00 | HYPOTHETICAL PROTEIN                                                           | V.I.D   |
| RSp1550 | RS02106 |       |      | -0.56 | 0.00 | -1.11 | 0.00 |       |      | CONSERVED HYPOTHETICAL PROTEIN                                                 | V.I.C   |
| RSp1551 | RS02107 |       |      | -0.59 | 0.01 | -1.32 | 0.00 | -1.00 | 0.00 | CONSERVED HYPOTHETICAL PROTEIN                                                 | V.I.C   |
| RSp1552 | RS02108 |       |      |       |      |       |      |       |      | SIGNAL PEPTIDE PROTEASE                                                        | II.A.4  |
| RSp1553 | RS02109 |       |      | 0.73  | 0.03 | -0.45 | 0.01 |       |      | TRANSCRIPTION REGULATOR TRANSMEMBRANE TWO-COMPONENT SENSOR                     | V.I.A   |
| RSp1554 | RS02110 |       |      |       |      |       |      |       |      | TRANSCRIPTION REGULATOR TWO-COMPONENT RESPONSE REGULATOR                       | V.I.A   |
| RSp1555 | RS02111 | -3.10 | 0.00 | -6.74 | 0.00 | 7.61  | 0.00 | 5.11  | 0.00 | SECRETED PROTEIN PopF1                                                         | IV.E.2  |
| RSp1556 | RS02112 |       |      | 1.01  | 0.00 |       |      |       |      | TRANSCRIPTION REGULATOR TRANSCRIPTION REGULATION REPRESSOR HE                  | I.F     |
| RSp1557 | RS02113 | 0.29  | 0.01 | -0.29 | 0.03 |       |      |       |      | glk GLUCOKINASE                                                                | I.H.8   |
| RSp1558 | RS02114 |       |      |       |      |       |      |       |      | OXIDOREDUCTASE 6-PHOSPHOGLUCONOLACTONASE                                       | I.F.19  |
| RSp1559 | RS02115 |       |      | -0.45 | 0.00 |       |      |       |      | OXIDOREDUCTASE GLUCOSE-6-PHOSPHATE 1-DEHYDROGENASE                             | I.F.19  |
| RSp1560 | RS02116 |       |      | 0.24  | 0.01 |       |      |       |      | OXIDOREDUCTASE PHOSPHOGLUCONATE DEHYDRATASE                                    | I.F.16  |
| RSp1561 | RS02117 |       |      |       |      |       |      |       |      | COG0589, Universal stress protein UspA and related nucleotide-binding proteins | IV.G    |
| RSp1562 | RS02118 |       |      | -0.41 | 0.00 |       |      |       |      | CONSERVED HYPOTHETICAL PROTEIN                                                 | V.I.C   |
| RSp1563 | RS02119 | -0.50 | 0.04 | -0.58 | 0.00 | -0.69 | 0.01 | 0.88  | 0.03 | TRANSMEMBRANE                                                                  | V.I.C   |
| RSp1564 | RS02120 |       |      | -1.73 | 0.00 | -1.14 | 0.00 |       |      | TRANSMEMBRANE CYTOCHROME C OXIDASE POLYPEPTIDE II (CYTOCHROME I.G.1            | I.G.1   |
| RSp1565 | RS02121 |       |      |       |      |       |      |       |      | OXIDOREDUCTASE CYTOCHROME C OXIDASE POLYPEPTIDE I (CYTOCHROME I.G.1            | I.G.1   |
| RSp1566 | RS02122 |       |      | -0.38 | 0.01 |       |      |       |      | OXIDOREDUCTASE GLUCOSE-6-PHOSPHATE 1-DEHYDROGENASE                             | I.G.19  |
| RSp1567 | RS02123 |       |      |       |      |       |      |       |      | OXIDOREDUCTASE CYTOCHROME-C OXIDASE                                            | I.G.1   |
| RSp1568 | RS02124 |       |      | -0.51 | 0.05 |       |      |       |      | TRANSMEMBRANE COG5605, Predicted small integral membrane protein               | III.B.1 |
| RSp1569 | RS02125 | 0.95  | 0.00 | -0.86 | 0.01 |       |      |       |      | TRANSMEMBRANE LIPOPROTEIN                                                      | V.I.B   |
| RSp1570 | RS02126 |       |      | -0.38 | 0.04 |       |      |       |      | HYPOTHETICAL PROTEIN                                                           | V.I.D   |
| RSp1571 | RS02127 | -0.65 | 0.01 | 0.82  | 0.01 | -1.31 | 0.00 | -0.57 | 0.00 | TRANSCRIPTION REGULATOR TRANSCRIPTIONAL REGULATOR                              | IV.A    |
| RSp1572 | RS02128 |       |      | 0.74  | 0.01 | -1.38 | 0.00 | -1.35 | 0.02 | TRANSMEMBRANE TRANSPORT PROTEIN                                                | IV.D    |
| RSp1573 | RS02129 |       |      | -0.52 | 0.01 | -0.57 | 0.02 | -0.70 | 0.05 | CONSERVED HYPOTHETICAL PROTEIN                                                 | V.I.C   |
| RSp1574 | RS02130 |       |      | -0.41 | 0.00 |       |      | -0.58 | 0.01 | TRANSCRIPTION REGULATOR TRANSCRIPTIONAL REGULATOR                              | V.I.A   |



|         |         |       |       |      |       |       |       |      |       |                                                              |          |                                                                              |         |
|---------|---------|-------|-------|------|-------|-------|-------|------|-------|--------------------------------------------------------------|----------|------------------------------------------------------------------------------|---------|
| RSp1575 | RS02131 |       | 0,75  | 0,01 | -0,48 | 0,00  |       |      |       | ABC TRANSPORTER AMINO-ACID-BINDING PERIPLASMIC PROTEIN (BBP) | IV.D.2   |                                                                              |         |
| RSp1576 | RS02132 |       | 0,90  | 0,01 | -0,49 | 0,02  | -0,41 | 0,02 |       | ABC TRANSPORTER AMINO-ACID TRANSMEMBRANE PROTEIN             | IV.D.2   |                                                                              |         |
| RSp1577 | RS02133 |       |       |      |       |       |       |      |       | ABC TRANSPORTER AMINO-ACID TRANSMEMBRANE PROTEIN             | IV.D.2   |                                                                              |         |
| RSp1578 | RS02134 |       | 0,86  | 0,01 |       |       | 0,66  | 0,05 | speB  | AGMATINASE                                                   | I.F.15   |                                                                              |         |
| RSp1579 | RS02135 |       | 0,90  | 0,02 | -0,39 | 0,00  |       | 0,82 | 0,00  | TRANSCRIPTION REGULATOR                                      | V.I.A    |                                                                              |         |
| RSp1580 | RS02136 |       |       |      | -0,65 | 0,00  |       | 1,23 | 0,04  | TRANSMEMBRANE                                                | V.I.C    |                                                                              |         |
| RSp1581 | RS02137 | -1,97 | 0,00  |      | 2,27  | 0,00  | 2,03  | 0,00 | 2,67  | 0,00                                                         | katE     | OXIDOREDUCTASE CATALASE hydroperoxidase HPII                                 | IV.G.4  |
| RSp1582 | RS02138 |       | -4,16 | 0,00 | -0,23 | 0,00  |       |      |       |                                                              |          | HYPOTHETICAL PROTEIN                                                         | V.I.D   |
| RSp1583 | RS02139 |       | 1,11  | 0,02 | -0,34 | 0,01  |       |      |       |                                                              |          | TRANSMEMBRANE O-acetylhomoserine sulfhydrylase                               | I       |
| RSp1584 | RS02143 |       |       |      | -0,52 | 0,02  |       |      |       |                                                              |          | HYPOTHETICAL PROTEIN                                                         | V.I.D   |
| RSp1585 | RS02144 |       |       |      |       |       |       |      |       |                                                              |          | TRANSMEMBRANE RHS-RELATED PROTEIN                                            | V.I.C   |
| RSp1586 | RS02145 |       |       |      |       |       |       |      |       |                                                              |          | HYPOTHETICAL PROTEIN                                                         | V.I.D   |
| RSp1587 | RS02141 |       |       |      | -0,32 | 0,02  |       |      |       |                                                              |          | REMNANT OF A TRANSPOSASE                                                     | V.A     |
| RSp1588 | RS02142 |       |       |      | -0,45 | 0,01  |       |      |       |                                                              |          | REMNANT OF A TRANSPOSASE GENE                                                | V.A     |
| RSp1589 | RS02146 |       |       |      |       |       |       |      |       |                                                              |          | HYPOTHETICAL PROTEIN                                                         | V.I.D   |
| RSp1590 | RS02147 |       |       |      |       |       |       |      |       |                                                              |          | OXIDOREDUCTASE COG0665, Glycine/D-amino acid oxidases (deaminating)          | I.I.3   |
| RSp1591 | RS02148 |       |       |      | -0,47 | 0,01  |       |      |       |                                                              |          | OXIDOREDUCTASE ALDEHYDE DEHYDROGENASE                                        | I       |
| RSp1592 | RS02149 |       |       |      | -0,18 | 0,03  |       |      |       |                                                              |          | ABC TRANSPORTER ABC-type branched-chain amino acid transport systems, peripl | IV.D.2  |
| RSp1593 | RS02150 |       | 0,70  | 0,05 | -0,33 | 0,04  |       |      |       |                                                              |          | TRANSCRIPTION REGULATOR TRANSCRIPTION REGULATOR                              | V.I.A   |
| RSp1594 | RS02151 |       |       |      |       |       |       |      |       |                                                              |          | SIGNAL PEPTIDE PORIN                                                         | IV.D    |
| RSp1595 | RS02152 |       |       |      | -0,44 | 0,02  |       |      |       |                                                              |          | TRANSMEMBRANE METABOLITE TRANSPORT PROTEIN                                   | IV.D    |
| RSp1596 | RS02153 |       |       |      | -0,49 | 0,01  |       |      |       |                                                              |          | HYPOTHETICAL PROTEIN                                                         | V.I.D   |
| RSp1597 | RS02154 |       |       |      |       |       |       |      |       |                                                              |          | TRANSMEMBRANE TRANSPORT PROTEIN                                              | IV.D    |
| RSp1598 | RS02155 |       |       |      |       |       |       |      |       |                                                              |          | TRANSMEMBRANE TRANSPORT PROTEIN                                              | IV.G.2  |
| RSp1599 | RS02156 |       |       |      |       |       | -0,77 | 0,05 |       |                                                              |          | OUTER MEMBRANE DRUG EFFLUX LIPOPROTEIN                                       | IV.G.2  |
| RSp1600 | RS02157 |       | 0,77  | 0,00 | -0,90 | 0,00  |       |      |       |                                                              |          | TRANSMEMBRANE                                                                | V.I.D   |
| RSp1601 | RS02158 |       | -1,74 | 0,05 | 1,99  | 0,00  | 2,62  | 0,00 |       |                                                              |          | CONSERVED HYPOTHETICAL PROTEIN                                               | V.I.C   |
| RSp1602 | RS02159 |       | -0,53 | 0,00 | -0,42 | 0,05  |       |      | 0,99  | 0,02                                                         |          | HYPOTHETICAL PROTEIN                                                         | V.I.D   |
| RSp1603 | RS02160 |       |       |      |       |       | 1,39  | 0,00 | 1,21  | 0,00                                                         |          | HYPOTHETICAL PROTEIN                                                         | V.I.B   |
| RSp1604 | RS02161 |       |       |      | 0,34  | 0,02  | 2,21  | 0,00 | 1,49  | 0,00                                                         |          | TRANSMEMBRANE                                                                | V.I.D   |
| RSp1605 | RS02162 |       |       |      | 0,60  | 0,03  | 1,63  | 0,00 |       |                                                              |          | HYPOTHETICAL PROTEIN                                                         | V.I.D   |
| RSp1606 | RS02163 |       |       |      | 0,21  | 0,01  | 1,56  | 0,00 | 1,27  | 0,04                                                         |          | TRANSMEMBRANE                                                                | V.I.D   |
| RSp1607 | RS02164 |       |       |      |       |       | 2,50  | 0,00 |       |                                                              |          | HYPOTHETICAL PROTEIN                                                         | V.I.D   |
| RSp1608 | RS02165 |       |       |      |       |       | 1,45  | 0,00 |       |                                                              |          | HYPOTHETICAL PROTEIN                                                         | V.I.D   |
| RSp1609 | RS02166 |       |       |      |       |       | 1,68  | 0,03 |       |                                                              |          | TRANSMEMBRANE ACID SPHINGOMYELINASE-LIKE PHOSPHODIESTERASE                   | V.I.C   |
| RSp1610 | RS02167 | -4,43 | 0,00  |      | -0,44 | 0,00  | 1,99  | 0,00 | 2,68  | 0,00                                                         |          | HYPOTHETICAL PROTEIN                                                         | V.I.D   |
| RSp1611 | RS02168 |       |       |      |       |       |       |      |       |                                                              | gabD2    | OXIDOREDUCTASE SUCCINATE-SEMIALDEHYDE DEHYDROGENASE                          | I.F.18  |
| RSp1612 | RS02169 |       |       |      | -0,42 | 0,01  |       |      |       |                                                              | ttuC     | OXIDOREDUCTASE TARTRATE DEHYDROGENASE                                        | I.I.4   |
| RSp1613 | RS02170 |       |       |      | -0,42 | 0,02  |       |      |       |                                                              | hpaI2    | 2,4-DIHYDROXYHEPT-2-ENE-1,7-DIOIC ACID ALDOLASE                              | I.I.4   |
| RSp1614 | RS02171 |       |       |      |       |       |       |      |       |                                                              |          | TRANSMEMBRANE TRANSPORT PROTEIN                                              | IV.D    |
| RSp1615 | RS02172 |       |       |      |       |       |       |      |       |                                                              | uxaA     | ALTRONATE HYDROLASE (ALTRONIC ACID HYDRATASE)                                | I.I.4   |
| RSp1616 | RS02173 |       |       |      |       |       |       |      |       |                                                              |          | TRANSCRIPTION REGULATOR TRANSCRIPTION REGULATOR                              | V.I.A   |
| RSp1617 | RS02174 |       |       |      |       |       |       |      |       |                                                              |          | TRANSCRIPTION REGULATOR COG1475 TRANSCRIPTION REGULATOR                      | V.I.A   |
| RSp1618 | RS02175 |       |       |      |       |       | -1,09 | 0,01 |       |                                                              |          | HYPOTHETICAL PROTEIN                                                         | V.I.D   |
| RSp1619 | RS02176 |       |       |      |       |       |       |      |       |                                                              |          | PHOSPHOADENOSINE PHOSPHOSULFATE SULFOTRANSFERASE                             | I       |
| RSp1620 | RS02177 |       |       |      |       |       |       |      |       |                                                              |          | SURFACE-EXPOSED ADHESIN PROTEIN                                              | I.II.A  |
| RSp1621 | RS02178 |       |       |      | -0,83 | 0,00  |       |      |       |                                                              | rcsB     | TRANSCRIPTION REGULATOR CAPSULAR SYNTHESIS RESPONSE REGULATO                 | III.A.1 |
| RSp1622 | RS02179 |       |       |      |       |       |       |      |       |                                                              | rcsC     | TRANSCRIPTION REGULATOR CAPSULAR SYNTHESIS REGULATORY PROTEIN                | III.A.1 |
| RSp1623 | RS02180 |       |       |      | -0,66 | 0,05  | -0,37 | 0,05 |       |                                                              |          | RESPONSE REGULATOR WITH EAL DOMAIN                                           | V.I.A   |
| RSp1624 | RS02182 |       |       |      |       |       | -1,72 | 0,01 |       |                                                              | tISRso1  | REMNANT OF A ISRso16-TRANSPOSASE ORFA                                        | V.A     |
| RSp1626 | RS02184 |       |       |      |       |       | 0,29  | 0,05 | -0,84 | 0,00                                                         |          | CONSERVED HYPOTHETICAL PROTEIN                                               | V.I.C   |
| RSp1627 | RS02185 |       |       |      |       |       |       |      | -0,40 | 0,01                                                         |          | CONSERVED HYPOTHETICAL PROTEIN                                               | V.I.C   |
| RSp1628 | RS02186 |       |       |      | -0,51 | 0,00  | -1,01 | 0,02 | 1,10  | 0,04                                                         | SRso1f   | ISRso16-TRANSPOSASE ORFB                                                     | V.A     |
| RSp1629 | RS02187 |       |       |      |       |       | -1,98 | 0,01 |       |                                                              | tISRso1f | C-TERMINUS OF tISRso16 ORFA TRANSPOSASE                                      | V.A     |
| RSp1630 | RS02188 |       |       |      |       |       |       |      |       |                                                              |          | REMNANT OF CYANATE LYASE                                                     | V.I.C   |
| RSp1632 | RS02190 |       |       |      |       |       |       |      |       |                                                              | oprB     | TRANSMEMBRANE PORIN B PRECURSOR OUTER (GLUCOSE PORIN)                        | IV.D.3  |
| RSp1633 | RS02191 |       |       |      |       |       | 0,74  | 0,00 |       |                                                              | xyI      | ABC TRANSPORTER D-XYLOSE-BINDING PERIPLASMIC PROTEIN                         | IV.D.3  |
| RSp1634 | RS02192 |       |       |      |       |       |       |      |       |                                                              | xyI      | ABC TRANSPORTER D-XYLOSE ATP-BINDING PROTEIN                                 | IV.D.3  |
| RSp1635 | RS02193 |       |       |      | -0,37 | 0,05  |       |      |       |                                                              | xyI      | ABC TRANSPORTER XYLOSE TRANSMEMBRANE PROTEIN                                 | IV.D.3  |
| RSp1636 | RS02194 |       |       |      |       |       |       |      |       |                                                              |          | OXIDOREDUCTASE COG0451, Nucleoside-diphosphate-sugar epimerase               | I       |
| RSp1637 | RS02195 |       |       |      | -0,39 | 0,02  |       |      |       |                                                              |          | TRANSCRIPTION REGULATOR TRANSCRIPTION REGULATOR                              | V.I.D   |
| RSp1638 | RS02196 |       |       |      |       |       | 1,42  | 0,03 |       |                                                              |          | TRANSMEMBRANE COG0697, Permeases of the drug/metabolite transporter (DMT)    | IV.A    |
| RSp1639 | RS02197 |       |       |      |       |       |       |      |       |                                                              |          | TRANSCRIPTION REGULATOR TRANSCRIPTIONAL REGULATOR                            | V.I.A   |
| RSp1640 | RS02198 |       |       |      | -1,25 | 0,00  |       |      | -1,35 | 0,00                                                         |          | TRANSMEMBRANE LIPOPROTEIN                                                    | V.I.C   |
| RSp1641 | RS02199 |       |       |      | -1,33 | 0,00  | -0,39 | 0,01 | -1,30 | 0,00                                                         |          | TRANSMEMBRANE                                                                | V.I.C   |
| RSp1642 | RS02200 |       |       |      | -1,14 | 0,00  | -1,12 | 0,00 | -2,29 | 0,00                                                         |          | TRANSMEMBRANE                                                                | V.I.C   |
| RSp1643 | RS02202 |       |       |      | -1,79 | 0,00  | -1,18 | 0,00 | -1,34 | 0,01                                                         |          | HYPOTHETICAL PROTEIN                                                         | V.I.D   |
| RSp1644 | RS02203 |       |       |      | 0,61  | 0,03  |       |      |       |                                                              |          | TRANSCRIPTION REGULATOR TRANSCRIPTION REGULATOR                              | V.I.A   |
| RSp1645 | RS02204 |       |       |      | -0,67 | 0,00  |       |      |       |                                                              |          | CONSERVED HYPOTHETICAL PROTEIN                                               | V.I.C   |
| RSp1646 | RS02205 |       |       |      | -0,40 | 0,01  |       |      | -0,52 | 0,01                                                         |          | SIGNAL PEPTIDE                                                               | V.I.C   |
| RSp1647 | RS02206 |       | 0,50  | 0,00 |       |       |       |      |       |                                                              |          | COG1352, Methylase of chemotaxis methyl-accepting proteins                   | IV.C    |
| RSp1649 | RS02208 |       |       |      |       |       |       |      |       |                                                              |          | TRANSMEMBRANE                                                                | V.I.D   |
| RSp1650 | RS02209 |       |       |      | -0,51 | 0,00  |       |      |       |                                                              |          | TRANSCRIPTION REGULATOR COG5662, Predicted transmembrane transcriptional     | V.I.A   |
| RSp1651 | RS02210 |       |       |      | -0,59 | 0,01  |       |      |       |                                                              |          | TRANSCRIPTION REGULATOR RNA POLYMERASE SIGMA FACTOR                          | I.E.1   |
| RSp1652 | RS02211 |       |       |      | -1,16 | 0,00  |       |      |       |                                                              |          | COG1409, Phosphohydrolase                                                    | I       |
| RSp1653 | RS02212 |       |       |      |       |       |       |      |       |                                                              |          | OXIDOREDUCTASE Cytochrome C oxidase subunit II                               | I.G.1   |
| RSp1654 | RS02213 | 0,37  | 0,03  | 0,43 | 0,00  | -1,47 | 0,00  | 1,22 | 0,00  | 1,68                                                         | 0,00     | SIGNAL PEPTIDE                                                               | V.I.D   |
| RSp1655 | RS02214 |       |       |      | -0,43 | 0,00  |       |      | 0,99  | 0,00                                                         |          | HYPOTHETICAL PROTEIN                                                         | V.I.D   |
| RSp1656 | RS02215 |       |       |      | 0,63  | 0,00  | -0,64 | 0,00 |       | 0,75                                                         | 0,04     | CONSERVED HYPOTHETICAL PROTEIN                                               | V.I.C   |
| RSp1657 | RS02216 |       |       |      |       |       | -0,51 | 0,00 |       |                                                              |          | CYCLOPROPANE-FATTY-ACYL-PHOSPHOLIPID SYNTHASE                                | I.C     |
| RSp1658 | RS02217 |       |       |      | 0,80  | 0,05  | -0,51 | 0,00 | -0,92 | 0,05                                                         |          | COG0824, Thioesterase                                                        | I       |
| RSp1659 | RS02218 |       |       |      | 0,42  | 0,04  |       | 0,34 | 0,02  |                                                              |          | ACYL-CARRIER-PROTEIN                                                         | I.B.1   |
| RSp1660 | RS02219 |       |       |      | 0,82  | 0,02  | -0,38 | 0,01 |       |                                                              |          | TRANSMEMBRANE                                                                | V.I.D   |
| RSp1661 | RS02220 |       |       |      | 0,45  | 0,04  |       |      |       |                                                              |          | CONSERVED HYPOTHETICAL PROTEIN                                               | V.I.C   |
| RSp1662 | RS02221 |       |       |      |       |       |       |      |       |                                                              |          | PEPTIDE CHAIN RELEASE FACTOR RF-3                                            | II.B.7  |
| RSp1663 | RS02222 |       |       |      | -1,06 | 0,00  | -0,52 | 0,00 | -0,93 | 0,00                                                         | prfC     | CONSERVED HYPOTHETICAL PROTEIN                                               | V.I.C   |
| RSp1664 | RS02223 |       |       |      |       |       |       |      |       |                                                              |          | TRANSMEMBRANE RIBONUCLEASE RNASE BN (RBN)                                    | II.A.2  |
| RSp1665 | RS02224 |       |       |      |       |       |       |      |       |                                                              |          | TRANSMEMBRANE                                                                | V.I.D   |
| RSp1666 | RS02225 |       |       |      |       |       | 0,85  | 0,04 | 1,66  | 0,00                                                         |          | SIGNAL PEPTIDE                                                               | V.I.B   |
| RSp1667 | RS02226 | -0,59 | 0,04  |      |       |       |       |      |       |                                                              |          | TRANSCRIPTION REGULATOR SIGMA-54 INTERACTING RESPONSE REGULATC               | V.I.A   |
| RSp1668 | RS02227 |       |       |      |       |       | 0,96  | 0,00 |       |                                                              |          | TRANSCRIPTION REGULATOR SIGMA-54 INTERACTING PROTEIN                         | V.I.A   |
| RSp1669 | RS02228 |       |       |      |       |       |       |      | 1,10  | 0,00                                                         |          | HYPOTHETICAL PROTEIN                                                         | V.I.D   |
| RSp1670 | RS02229 |       |       |      | -1,11 | 0,04  |       |      | 2,43  | 0,00                                                         |          | SIGNAL PEPTIDE                                                               | V.I.D   |
| RSp1671 | RS02230 |       |       |      |       |       |       |      |       |                                                              | rhoN2    | TRANSCRIPTION REGULATOR RNA POLYMERASE SIGMA N (SIGMA 54) FACTO              | I.E.1   |
| RSp1672 | RS02231 |       |       |      |       |       |       |      | 0,92  | 0,00                                                         |          | COG3233, Deacetylase                                                         | I       |
| RSp1673 | RS02232 |       |       |      | -0,30 | 0,02  |       |      |       |                                                              |          | TRANSMEMBRANE LIPOPROTEIN                                                    | V.I.D   |
| RSp1674 | RS02233 |       |       |      |       |       |       |      |       |                                                              |          | HYPOTHETICAL PROTEIN                                                         | V.I.D   |
| RSp1676 | RS02235 |       |       |      |       |       |       |      |       |                                                              |          | TRANSCRIPTION REGULATOR COMPOSITE TWO-COMPONENT REGULATORY                   | V.I.A   |
| RSp1677 | RS02236 |       |       |      |       |       |       |      |       |                                                              |          | INTEGRASE / RECOMBINASE                                                      | V.A     |
| RSp1678 | RS02237 |       | 0,70  | 0,00 | -0,45 | 0,00  |       |      |       |                                                              |          | TRANSMEMBRANE COG2252, Permease                                              | IV.D    |
